# Supplementary material for: An updated C. elegans nuclear body muscle transcriptome for studies in muscle formation and function
Source: Skelet Muscle. 2023 Mar 2;13:4. doi: 10.1186/s13395-023-00314-2 (PMC9979539; doi:10.1186/s13395-023-00314-2)
Supplement: Supplementary file 2 — Additional file 2: Supplemental Table S1. Comprehensive list of transcripts identified in this study. [file 13395_2023_314_MOESM2_ESM.xlsx]

## Sheet: Protein_coding
WBgene	alias	description	set12_cuff_median	Blazie	Fox	Kotagama	Human ortholog	Name	Generic Name
WBGene00015796	C15F1.5	none available	15864.6				n/a	n/a	n/a
WBGene00007131	B0284.1	none available	14266.9	Y			n/a	n/a	n/a
WBGene00000225	atgp-2	atgp-2 encodes an amino acid transporter glycoprotein subunit; when co-expressed in Xenopus oocytes with either the AAT-1 or AAT-3 catalytic subunit, ATGP-2 facilitates amino acid uptake and exchange, showing a relatively high affinity for small and some large neutral amino acids; when co-expressed with AAT-9, ATGP-2 is able to enhance the activity of this catalytic subunit; ATGP-2 can covalently…	12843.3	Y			ENSG00000168003	SLC3A2	Glycosyl hydrolase, family 13, catalytic domain
WBGene00020781	T24H7.2	T24H7.2 encodes an ortholog of hypoxia-upregulated vertebrate proteins such as human HYOU1; T24H7.2, its C. elegans paralog T14G8.3, and HYOU1 are ER resident hsp70 family molecular chaperone homologs; the grp (glucose regulated protein) 170 family is a collection of related large hsp70 chaperones confined to the ER; members of this family are present in all eukaryotes, participating in a wide ra…	12227.5				ENSG00000280682	HYOU1	Heat shock protein 70 family
WBGene00004409	rla-1	rla-1 encodes an acidic ribosomal subunit protein P1.	9753.61	Y		Y	ENSG00000137818	RPLP1	Trypanosoma cruzi ribosomal protein P2-like
WBGene00010269	F58G1.7	none available	8890.64				n/a	n/a	n/a
WBGene00007586	ril-2	none available	7817.34				n/a	n/a	n/a
WBGene00000512	ckb-2	ckb-2 encodes an isoform of choline kinase whose activity has been verified in vitro; CKB-1 through CKB-4 comprise a related group ("B") of choline kinases; purified CKB-2 has a strong preference for choline over ethanolamine, a specific activity of 2.4 micromol/min/mg protein and a pH optimum near 10.	7426.96				ENSG00000254413	CHKB-CPT1B	Protein kinase-like domain
WBGene00002005	hsp-1	hsp-1 encodes hsp70A, a member of the heat shock family of proteins; hsp70A is closely related to the Drosophila heat inducible hsp70s and the S. cerevisiae SSA hsp70 subfamily; the hsp-1 gene is normally expressed throughout development and upon heat-shock the hsp-1 mRNA is enhanced 2-6 fold; down-regulation of hsp-1 via RNA interference results in a small reduction in the life-span of an age-1 …	6444.27	Y			ENSG00000226704	HSPA1L	Heat shock protein 70 family
WBGene00008920	eef-1G	none available	5590.55	Y			ENSG00000234125	n/a	Translation elongation factor EF1B, gamma chain, conserved
WBGene00009123	F25H2.12	none available	4693.23			Y	ENSG00000127720	METTL25	Methyltransferase domain
WBGene00009122	tct-1	none available	4693.23	Y			ENSG00000133112	TPT1	Mss4-like
WBGene00008362	cfim-2	D1046.1 encodes a putative cleavage and polyadenylation specificity factor, orthologous to human CPSF6 (OMIM:604979) and CPSF7, that is required for normal locomotion and fertility; D1046.1 is expressed in many, if not all, somatic tissues of larvae and adults; D1046.1(RNAi) has no obvious synthetic phenotype in dual RNAi assays with W04D2.6 (an ortholog of the splicing protein RED120).	4218	Y			ENSG00000111605	CPSF6	Nucleotide-binding alpha-beta plait domain
WBGene00255595	D1046.18	none available	4218	Y			n/a	n/a	n/a
WBGene00007514	catp-8	none available	2837.2				ENSG00000105726	ATP13A1	P-type ATPase
WBGene00006781	unc-45	unc-45 encodes a conserved, muscle-specific protein that contains an N-terminal TRP (tetratricopeptide repeat) and a C-terminal UCS (UNC-45-CRO1-She4p) domain; during body wall muscle development, UNC-45 activity is essential for proper thick filament formation and sarcomere organization; in addition, maternally provided UNC-45 is required for embryonic polarity, cytokinesis, and germline cellula…	2768.54	Y	Y		ENSG00000140553	UNC45A	Armadillo-like helical
WBGene00010627	K07C5.4	none available	2605.18	Y			ENSG00000101361	NOP56	Nop domain
WBGene00006777	unc-41	unc-41 encodes an ortholog of Drosophila STONED B (STNB) required for normal locomotion; a beta-strand in the mu-adaptin-like domain of UNC-41 binds the C2A domain of SNT-1, and this binding is required for SNT-1 endocytosis, punctate localization of UNC-41 in neurons, and transgenic rescue of unc-41(e268) animals; UNC-41 is also required for normal secretion of EGL-17 from P6.p cells, and for em…	1533.76				ENSG00000243244	STON1	PH domain-like
WBGene00015173	trpp-11	none available	1506.62	Y			ENSG00000168538	TRAPPC11	Winged helix-turn-helix DNA-binding domain
WBGene00003148	mbf-1	none available	1439.53	Y			ENSG00000107223	EDF1	Cro/C1-type helix-turn-helix domain
WBGene00001748	gsp-2	none available	1428.7	Y			ENSG00000213639	PPP1CB	Calcineurin-like phosphoesterase domain, apaH type
WBGene00017074	D2096.7	none available	1338.03	Y			n/a	n/a	n/a
WBGene00017075	nap-1	D2096.8 encodes a protein related in sequence to the conserved NAP (Nucleosome Assembly Protein) family of proteins involved in chromatin remodeling; loss of D2096.8 activity in wild-type and various mutant backgrounds suggests that, in C. elegans, the product of D2096.8 is required for proper transcriptional regulation that affects a number of biological processes including embryonic and larval …	1338.03	Y			ENSG00000204118	NAP1L6	Nucleosome assembly protein (NAP)
WBGene00012347	W08G11.3	none available	1293.34			Y	n/a	n/a	n/a
WBGene00012348	pptr-1	pptr-1 encodes a PP2A holoenzyme regulatory subunit, a member of the B56 family of genes homologous to mammalian PPP2R5B (OMIM: 601644); out of the seven PP2A regulatory subunits only pptr-1 regulates dauer formation downstream of daf-2;pptr-1 controls dauer formation specifically through the IIS pathway; pptr-1 regulates multiple phenotypes associated with the IIS pathways like stress resistance…	1290.99	Y			ENSG00000112640	PPP2R5D	Protein phosphatase 2A, regulatory B subunit, B56
WBGene00021352	Y37E3.11	none available	866.01				ENSG00000185813	PCYT2	Cytidyltransferase-like domain
WBGene00010082	F55A11.11	F55A11.11 encodes a member of the histidine phosphatase superfamily orthologous to Bombyx mori ecdysteroid phosphate phosphatase (EPP), human STS1 (OMIM:609201) and human UBASH3A (OMIM:605736); F55A11.11 lacks the consensus sequence for phosphatase activity, and thus is predicted to be catalytically inactive; F55A11.11 is also paralogous to C. elegans C52E4.7, F09C12.8, F53B6.7, and T07F12.1; los…	848.84				ENSG00000160185	UBASH3A	Histidine phosphatase superfamily, clade-1
WBGene00010079	F55A11.6	F55A11.6 encodes a protein most similar to glutathione S-transferases; as loss of F55A11.6 activity via large-scale RNAi results in no obvious defects, the precise role of F55A11.6 in C. elegans development and/or behavior is not yet known.	848.84				n/a	n/a	n/a
WBGene00007352	cdc-48.1	cdc-48.1 encodes a type II AAA ATPase, homologous to yeast Cdc48 and mammalian p97/VCP, that functions as a ubiquitin-selective chaperone; cdc-48.1 acts redundantly with cdc-48.2 and in conjunction with ufd-1 and npl-4 in endoplasmic reticulum-associated protein degradation (ERAD); in addition, CDC-48.1, UFD-2 and chn-1 function together to regulate myosin assembly and muscle formation via the UN…	721.03				ENSG00000171763	SPATA5L1	CDC48, N-terminal subdomain
WBGene00009069	F23A7.4	none available	634.03	Y			n/a	n/a	n/a
WBGene00001386	far-2	far-2 encodes a protein similar to a class of secreted fatty acid and retinol-binding proteins expressed in parasitic nematodes and secreted in the surrounding tissues of the host; expressed in body wall muscle and vulval cells of adult hermaphrodites, and transcript levels progressively increase during development.	482.84	Y	Y		n/a	n/a	n/a
WBGene00007513	wht-2	wht-2 encodes a putative member of subfamily G of the ATP-binding cassette transporters; WHT-2 is required, redundantly with its paralog MRP-4, for sperm to normally migrate towards a PUFA-based signal exuded by oocytes; hermaphrodites subjected to double wht-2(RNAi) mrp-4(RNAi) are infertile, both through aberrant loss of their own sperm and through failure of males to effectively inseminate the…	353.78				ENSG00000143921	ABCG8	ABC transporter-like
WBGene00010964	ctc-1	The ctc-1 gene resides on the mitochondrial chromosome, and encodes the protein cytochrome c oxidase subunit 1; CTC-1 functions as the catalytic subunit of the cytochrome c oxidase complex (also known as Complex IV) that is the terminal member of the electron transport chain that catalyzes the reduction of oxygen to water.	325.21			Y	ENSG00000198804	MT-CO1	Cytochrome c oxidase subunit I
WBGene00044638	F23A7.8	none available	283.99				n/a	n/a	n/a
WBGene00010962	ctc-3	The ctc-3 gene resides on the mitochondrial chromosome, and encodes the protein cytochrome c oxidase subunit 3; cytochrome c oxidase is the component of the respiratory chain that catalyzes the reduction of oxygen to water; CTC-3 is one of the 3 subunits (1-3) that forms the functional core of the enzyme complex.	277.82			Y	ENSG00000198938	MT-CO3	Cytochrome c oxidase subunit III domain
WBGene00001385	far-1	far-1 encodes a fatty acid/retinol binding protein; expressed throughout development with highest expression levels in L3 stage larvae and in adult males.	263.74	Y	Y	Y	n/a	n/a	n/a
WBGene00006930	vit-6	vit-6 encodes a vitellogenin precursor protein that is cleaved in the body cavity into two smaller yolk proteins, YP115 and YP88; in C. elegans, vitellogenin genes exhibit stage-, sex-, and tissue-specific expression being expressed exclusively in the adult hermaphrodite intestine.	237.9	Y		Y	n/a	n/a	n/a
WBGene00015913	C17F4.7	none available	237.58				n/a	n/a	n/a
WBGene00000680	col-106	col-106 encodes a predicted cuticular collagen.	236.2	Y			ENSG00000133661	SFTPD	Nematode cuticle collagen, N-terminal
WBGene00000829	ctb-1	The ctb-1 gene resides on the mitochondrial chromosome, and encodes the cytochrome b protein of mitochondrial complex III; mutation of ctb-1 suppresses the slow embryonic development of isp-1 mutants, while enhancing their paraquat resistance.	225.82			Y	ENSG00000198727	MT-CYB	Cytochrome b/b6, N-terminal
WBGene00018150	epg-4	none available	224.65	Y			ENSG00000149547	EI24	Etoposide-induced 2.4
WBGene00018149	F37C12.1	none available	224.65				ENSG00000105248	CCDC94	CWC16 protein
WBGene00018151	F37C12.3	none available	224.65	Y			ENSG00000004779	NDUFAB1	Phosphopantetheine binding ACP domain
WBGene00022121	cogc-3	cogc-3 encodes an ortholog of mammalian COG-3/Sec34, a subunit of lobe A of the conserved oligomeric Golgi complex (COGC); COGC-3 is required for normal gonadal distal tip cell migration, a process that also requires COGC-1 and six other orthologs of COGC subunits; COGC-3 is also required for normal vulval morphology, growth rate, ventral nerve cord fasciculation, and adult locomotion; COGC-3 has…	223.23				ENSG00000136152	COG3	Conserved oligomeric Golgi complex, subunit 3
WBGene00016636	perm-2	none available	216.69				n/a	n/a	n/a
WBGene00006926	vit-2	vit-2 encodes the vitellogenin homolog YP170; vit-2 is expressed in the adult hermaphrodite intestine and VIT-2 is secreted into the pseudocoelomic space before being taken up by developing oocytes; vit-2 expression is regulated in a sex-, stage-, and tissue-specific manner by the ELT-2/GATA and MAB-3 transcription factors.	211.91	Y			n/a	n/a	n/a
WBGene00017088	akir-1	none available	207.48	Y			ENSG00000174574	AKIRIN1	Akirin
WBGene00012382	ttr-16	none available	191.55	Y	Y		n/a	n/a	n/a
WBGene00019462	K07A9.3	none available	190.79				n/a	n/a	n/a
WBGene00003893	ost-1	ost-1 encodes the C. elegans ortholog of the conserved basement membrane glycoprotein component osteonectin/SPARC/BM-40; loss of ost-1 function via RNAi indicates that ost-1 activity is required for embryonic and larval development, as well as for normal gut development, body size, and fecundity; an OST-1::GFP reporter fusion protein localizes to the basement membranes along body wall and sex mus…	190.57	Y	Y		ENSG00000152583	SPARCL1	Kazal domain
WBGene00000098	air-1	AIR-1 belongs to the Aurora-A family of serine/threonine kinases that localize to centrosomes; AIR-1 is required for embryonic survival, germline proliferation and development, locomotion, and vulval development; AIR-1 is required to recruit centrosomal gamma-tubulin during maturation; Aurora-A kinases are implicated in centrosome separation and spindle assembly.	183.56			Y	ENSG00000178999	AURKB	Protein kinase domain
WBGene00000675	col-101	col-101 encodes a cuticle collagen; loss of col-101 via large-scale RNAi screens results in animals that are pale and slow growing.	182.63				ENSG00000019169	MARCO	Nematode cuticle collagen, N-terminal
WBGene00021731	Y49G5A.1	none available	181.22				n/a	n/a	n/a
WBGene00000733	col-160	none available	174.78	Y			ENSG00000019169	MARCO	Nematode cuticle collagen, N-terminal
WBGene00000214	asp-1	asp-1 encodes a homolog of cathepsin D aspartic protease; it is transcribed exclusively in intestinal cells of the late embryo and early larvae and is not observed in older larvae or adults; ASP-1 is dispensable for neuronal degeneration.	166.14	Y			ENSG00000256713	PGA5	Aspartic peptidase A1 family
WBGene00016011	C23G10.2	none available	163.15	Y			ENSG00000132541	RIDA	RidA family
WBGene00016638	perm-4	none available	156.2	Y		Y	n/a	n/a	n/a
WBGene00010557	mspn-1	none available	155.21	Y			ENSG00000283024	ATAD1	AAA+ ATPase domain
WBGene00010556	rack-1	rack-1 encodes a seven-WD repeat-containing protein that is the C. elegans ortholog of vertebrate Receptor for Activated C Kinase (Rack1); rack-1 is required cell autonomously for VD/DD motor axon pathfinding; rack-1 is also required for gonadal distal tip cell migration and for normal brood sizes; genetic analyses indicate that rack-1 functions in the same pathway with ced-10/Rac and unc-115/abL…	155.21	Y			ENSG00000204628	RACK1	WD40 repeat
WBGene00018297	F41F3.3	none available	150.94	Y			n/a	n/a	n/a
WBGene00001168	eef-1A.1	eef-1A.1 encodes a translation elongation factor 1-alpha homolog that is required for embryonic viability, fertility, and germline maintenance; EEF-1A.1 is identical to EEF-1A.2	146.65	Y			ENSG00000156508	EEF1A1	Transcription factor, GTP-binding domain
WBGene00002280	let-2	let-2 encodes an alpha-2 type IV collagen, probably most closely equivalent to the human gene COL4A2 (OMIM:120090) on the basis of biological function; LET-2 is required for embryonic development and is a component of the basement membrane between muscle and hypodermis; LET-2 interacts with UNC-105, a mechanosensory ion channel of the degenerin ion channel superfamily that is expressed in muscle …	138.21	Y	Y		ENSG00000235708	COL11A2	Collagen IV, non-collagenous
WBGene00012179	W01D2.1	none available	137.13	Y			ENSG00000145592	RPL37	Ribosomal protein L37e
WBGene00018756	F53C3.13	none available	132.98	Y			ENSG00000162407	PLPP3	Phosphatidic acid phosphatase type 2/haloperoxidase
WBGene00016493	C37A2.7	none available	131.64	Y			ENSG00000177600	RPLP2	n/a
WBGene00020107	R151.2	R151.2 is orthologous to the human gene PHOSPHORIBOSYL PYROPHOSPHATE SYNTHETASE 1 (PRPS1; OMIM:311850), which when mutated leads to disease	128.96				ENSG00000229937	PRPS1L1	Ribose-phosphate diphosphokinase
WBGene00194742	F37C12.21	none available	127.91				n/a	n/a	n/a
WBGene00010960	atp-6	The atp-6 gene resides on the mitochondrial chromosome, and encodes the protein ATP synthase subunit a; this is the C. elegans homolog of the MT-ATP6 mitochondrial membrane ATP synthase (Complex V).	127.76				ENSG00000198899	MT-ATP6	ATPase, F0 complex, subunit A
WBGene00010959	nduo-1	The nduo-1 gene resides on the mitochondrial chromosome, and encodes the protein NADH-ubiquinone oxidoreductase chain 1; this is the C. elegans homolog of the core MT-ND1 of mitochondrial NADH:ubiquinone oxidoreductase (Complex I).	127.76			Y	ENSG00000198888	MT-ND1	NADH:ubiquinone oxidoreductase, subunit 1/F420H2 oxidoreductase subunit H
WBGene00012646	lron-10	none available	126.99	Y			n/a	n/a	n/a
WBGene00000776	cpl-1	cpl-1 encodes a member of the cathepsin L-like cysteine protease family required for embryonic viability and normal growth; expressed in eggshells and throughout early embryos, accumulates in intestinal cells during late embryogenesis, and expressed in the cuticle, gonad, and pharynx later in development.	126.46	Y	Y	Y	ENSG00000174080	CTSF	Peptidase C1A, papain C-terminal
WBGene00000732	col-159	none available	124.78				ENSG00000019169	MARCO	Nematode cuticle collagen, N-terminal
WBGene00006439	ant-1.1	ant-1.1 encodes one of four C. elegans mitochondrial adenine nucleotide transporters; by homology, ANT-1.1 is predicted to facilitate ADP/ATP exchange between the cytosol and mitochondria; ant-1.1 is an essential gene, required for embryogenesis as well as for normal postembryonic body size and adult lifespan; in addition, ANT-1.1 plays a critical role in promoting somatic and germline programmed…	124.77	Y			ENSG00000151729	SLC25A4	Mitochondrial carrier protein
WBGene00002185	kel-3	none available	124.77				ENSG00000114648	KLHL18	BTB/POZ domain
WBGene00000754	col-181	col-181 is homologous to the human gene PRO ALPHA 1(I) COLLAGEN (COL1A1; OMIM:120150), which when mutated leads to osteogenesis imperfecta.	122.24	Y			ENSG00000019169	MARCO	Nematode cuticle collagen, N-terminal
WBGene00021507	Y41D4A.5	none available	122.13	Y			ENSG00000204179	PTPN20	PTP type protein phosphatase
WBGene00007195	B0513.2	B0513.2 encodes the C. elegans ortholog of mammalian THOC7, a subunit of the THO complex involved in mRNP biogenesis as part of transcription elongation, mRNA maturation, and export.	121.22	Y		Y	ENSG00000163634	THOC7	THO complex subunit 7/Mft1
WBGene00001423	fib-1	fib-1 encodes the C. elegans ortholog of fibrillarin and Saccharomyces cerevisiae Nop1p, an essential component of the U3 SnoRNP; FIB-1 localizes to the nucleolus.	120.42	Y			ENSG00000188573	FBLL1	Fibrillarin
WBGene00011482	hpo-4	none available	116.98			Y	ENSG00000142892	PIGK	Peptidase C13, legumain
WBGene00022336	Y82E9BR.3	none available	115.23	Y			ENSG00000154518	ATP5G3	ATPase, F0 complex, subunit C
WBGene00004408	rla-0	rpa-0 encodes an acidic ribosomal subunit protein P0.	114.38	Y		Y	ENSG00000089157	RPLP0	Ribosomal protein L10P
WBGene00009394	clec-63	none available	114.32	Y			n/a	n/a	n/a
WBGene00018774	F53G12.9	none available	114.24	Y			ENSG00000146267	FAXC	Glutathione S-transferase, C-terminal-like
WBGene00000594	col-3	col-3 encodes a collagen protein that affects body morphogenesis, larval viability, and locomotion in large scale RNAi screens; mRNA is expressed during all developmental stages examined (in embryos, during the L2 to dauer molt, during the dauer to L4 larval molt, and during the L4 to adult molt).	114.07	Y			ENSG00000019169	MARCO	Nematode cuticle collagen, N-terminal
WBGene00000691	col-117	none available	113.89	Y		Y	ENSG00000019169	MARCO	Nematode cuticle collagen, N-terminal
WBGene00017121	cyc-2.1	cyc-2.1 encodes, along with cyc-2.2, one of two C. elegans cytochrome c proteins; the product of cyc-2.1 is predicted to function in the electron transport chain by transferring electrons from respiratory chain Complex III to Complex IV; large-scale RNAi screens indicate the cyc-2.1 activity is required for embryonic and larval development as well as for normal brood sizes and growth rates.	112	Y		Y	ENSG00000269383	n/a	Cytochrome c, class IA/ IB
WBGene00045272	F59C12.4	none available	111.03	Y			n/a	n/a	n/a
WBGene00019466	tos-1	none available	109.88	Y		Y	n/a	n/a	n/a
WBGene00007504	C09H10.10	none available	107.84	Y		Y	n/a	n/a	n/a
WBGene00004999	spp-14	none available	107.7	Y		Y	n/a	n/a	n/a
WBGene00018271	F41C3.5	F41C3.5 encodes a serine carboxypeptidase that is related to human cathepsin A (CTSA, OMIM:256540, mutations are associated with galactosialidosis: beta-galactosidase and alpha-neuraminidase deficiency); microarray experiments have shown that F41C3.5 mRNA levels are reduced in a lin-14 loss-of-function mutant background, suggesting that F41C3.5 expression is positively regulated by LIN-14; large-…	106.49	Y		Y	ENSG00000106066	CPVL	Peptidase S10, serine carboxypeptidase
WBGene00012615	dct-16	none available	106.46				n/a	n/a	n/a
WBGene00018938	F56C3.1	none available	104.19				n/a	n/a	n/a
WBGene00010809	M01F1.3	none available	103.63	Y	Y	Y	ENSG00000121897	LIAS	Lipoyl synthase
WBGene00002254	lbp-2	lbp-2 encodes a homolog of the novel fatty acid binding protein, As-p18, found in the parasitic nematode Ascaris suum; As-p18 is a member of a family of small intracellular fatty acid binding proteins (iFABPs); the expression pattern of lpb-2 is consistent with it being secreted into the perienteric fluid where it may play a role in lipid transport beween the intestine and body wall; a lbp-2 prom…	102.76		Y	Y	n/a	n/a	n/a
WBGene00000713	col-140	none available	101.98				ENSG00000133661	SFTPD	Nematode cuticle collagen, N-terminal
WBGene00006929	vit-5	vit-5 encodes a vitellogenin, a lipid-binding protein precursor related to vertebrate vitellogenins and mammalian ApoB-100, a core LDL particle constituent; by homology, VIT-5 is predicted to function as a lipid transport protein; loss of vit-5 activity via large-scale RNA-mediated interference (RNAi) screens indicates that VIT-5 is required for embryogenesis and normal rates of postembryonic gro…	101.57	Y			n/a	n/a	n/a
WBGene00019537	K08D12.3	K08D12.3 is orthologous to human ZNF9 (CNBP; OMIM:116955, mutated in myotonic dystrophy type 2) and ZCCHC13; like ZNF9, K08D12.3 is most conspicuously expressed in muscle cells; K08D12.3 is required for normal locomotion in mass RNAi assays, as well as for fertility, embryonic and larval viability, and general health.	101.27	Y			ENSG00000187969	ZCCHC13	Zinc finger, CCHC-type
WBGene00016943	acdh-1	acdh-1 encodes a short-chain acyl-CoA dehydrogenase; ACDH-1 is predicted to be a mitochondrial enzyme that catalyzes the first step of fatty acid beta-oxidation and thus plays a key role in energy production; steady-state acdh-1 mRNA levels are under the control of the MDT-15 mediator complex subunit; in addition, gene expression studies indicate that acdh-1 expression is upregulated in daf-2 mut…	100.44	Y			ENSG00000122971	ACADS	Acyl-CoA oxidase/dehydrogenase, central domain
WBGene00006911	vha-2	vha-2 and vha-3 encode an ortholog of subunit c of the membrane-bound (V0) domain of vacuolar proton-translocating ATPase (V-ATPase); the protein encoded by vha-2 and vha-3 (VHA-2/3) is identical; VHA-2/3 is a predicted V-ATPase transmembrane rotor component, whose polypeptide sequence is identical to that of VHA-3; VHA-1 and VHA-2/3 comprise a closely related family of subunit c co-orthologs, pr…	99.82	Y			ENSG00000185883	ATP6V0C	V-ATPase proteolipid subunit
WBGene00001794	gta-1	The gta-1 gene encodes an ortholog of the human gene GABAT, which when mutated leads to GABA-transaminase deficiency (OMIM:137150).	98.97	Y	Y	Y	ENSG00000183044	ABAT	4-aminobutyrate aminotransferase, eukaryotic
WBGene00000093	agt-1	agt-1 encodes an ortholog of the DNA repair enzyme O6-Alkylguanine DNA-alkyltransferase (AGT).	98.69				ENSG00000170430	MGMT	Winged helix-turn-helix DNA-binding domain
WBGene00004410	rla-2	rla-2 encodes an acidic ribosomal subunit protein P2.	98.69	Y			ENSG00000177600	RPLP2	n/a
WBGene00022117	Y71F9AL.12	none available	98.21			Y	n/a	n/a	n/a
WBGene00194982	Y17D7B.10	none available	98.17				n/a	n/a	n/a
WBGene00000802	crt-1	crt-1 encodes an ortholog of calreticulin (a calcium-binding molecular chaperone of the endoplasmic reticulum); crt-1 is dispensable for viability, but required for normal sperm development, male mating efficiency, some forms of necrotic cell death, and hermaphrodite fertility at high temperatures (which may reflect a stress response); crt-1 expression is induced by stress; CRT-1 protein binds Ca…	98.14	Y		Y	ENSG00000269058	CALR3	Calreticulin/calnexin
WBGene00016907	C53H9.2	C53H9.2 encodes at least three protein isoforms orthologous to the GTP-binding proteins human GNL1 (HSR1; OMIM:143024) and murine MMR1, as well as LSG1 in S. cerevisiae and many other eukaryotic and bacterial proteins; one alternative transcription unit of the C53H9.2 locus, C53H9.2a, has a natural nonsense transcript that is up-regulated in vivo by smg[-] mutations, indicating that C53H9.2 is a …	97.74				ENSG00000041802	LSG1	GTP binding domain
WBGene00010958	ndfl-4	The ndfl-4 gene resides on the mitochondrial chromosome, and encodes the protein NADH-ubiquinone oxidoreductase chain 4L; this is the C. elegans homolog of the core MT-ND4L of mitochondrial NADH:ubiquinone oxidoreductase (Complex I).	97.07			Y	n/a	n/a	n/a
WBGene00010957	nduo-6	The nduo-6 gene resides on the mitochondrial chromosome, and encodes the protein NADH-ubiquinone oxidoreductase chain 6; this is the C. elegans homolog of the core MT-ND6 of mitochondrial NADH:ubiquinone oxidoreductase (Complex I).	97.07				n/a	n/a	n/a
WBGene00010965	ctc-2	The ctc-2 gene resides on the mitochondrial chromosome, and encodes the protein cytochrome c oxidase subunit 2; cytochrome c oxidase is the component of the respiratory chain that catalyzes the reduction of oxygen to water; CTC-2 is one of the 3 subunits (1-3) that forms the functional core of the enzyme complex.	96.23			Y	ENSG00000198712	MT-CO2	Cytochrome c oxidase subunit II C-terminal
WBGene00017925	F29B9.11	none available	94.34	Y			n/a	n/a	n/a
WBGene00001263	emb-9	emb-9 encodes the alpha-1 chain of Type IV basement membrane collagen most closely equivalent to human COL4A1 (OMIM:120130) on the basis of biological function; EMB-9 forms heterotrimeric Type IV collagen with LET-2, the alpha-2-like chain, and is required for the assembly and/or secretion of LET-2; EMB-9 is essential for embryonic morphogenesis, particularly epidermal elongation, and for larval …	94.02	Y	Y		ENSG00000235708	COL11A2	Collagen IV, non-collagenous
WBGene00016964	C56C10.7	none available	93.84	Y		Y	ENSG00000253251	n/a	Protein of unknown function DUF974
WBGene00002045	icd-1	icd-1 encodes the C. elegans ortholog of the beta-subunit of the nascent polypeptide-associated complex (betaNAC); during development, icd-1 activity is required for prevention of ced-4-dependent, but ced-3-independent, programmed cell death and for normal embryonic development; ICD-1 is widely expressed throughout development and colocalizes primarily with mitochondria.	93.84	Y			ENSG00000145741	BTF3	Nascent polypeptide-associated complex NAC domain
WBGene00000668	col-93	none available	93.41	Y			ENSG00000133661	SFTPD	Nematode cuticle collagen, N-terminal
WBGene00000696	col-122	none available	92.74	Y			ENSG00000019169	MARCO	Nematode cuticle collagen, N-terminal
WBGene00000088	aex-5	an ortholog of calcium-dependent serine endoproteinases, the kex2/subtilisin-like proprotein convertase that affects defecation cycle and anterior body contractions; and is expressed in all muscle cells except pharyngeal muscles.	92.03	Y			n/a	n/a	n/a
WBGene00006789	unc-54	unc-54 encodes a muscle myosin class II heavy chain (MHC B); UNC-54 is the major myosin heavy chain expressed in C. elegans and is required for locomotion and egg-laying; in vivo and in vitro, UNC-54 interacts with ITR-1, an IP3 receptor, and this interaction may provide a link between calcium signaling and the muscle cytoskeleton; UNC-54 is a thick filament component that is expressed in multipl…	92.03	Y	Y		ENSG00000133392	MYH11	Myosin head, motor domain
WBGene00001167	eef-2	eef-2 encodes a homolog of translation elongation factor 2 (EF-2), a GTP-binding protein essential for the elongation phase of protein synthesis; eef-2 is required for embryogenesis and vulval morphogenesis, and is expressed during all stages of development, including the dauer larval stage.	90.19	Y			ENSG00000108883	EFTUD2	Translation elongation factor EFG, V domain
WBGene00008639	F10B5.2	none available	89.64				ENSG00000131043	AAR2	A1 cistron-splicing factor, AAR2
WBGene00022497	Y119D3B.21	none available	89.26	Y			n/a	n/a	n/a
WBGene00022127	yop-1	none available	87.21	Y			ENSG00000115255	REEP6	TB2/DP1/HVA22-related protein
WBGene00020894	T28D9.1	none available	87.17	Y			n/a	n/a	n/a
WBGene00003242	mig-6	mig-6 encodes at least two protein isoforms (long and short) that are highly similar to the extracellular matrix proteins papilin and lacunin; mig-6 is an essential gene required for embryonic hypodermal cell enclosure and normal excretory canal cell function in L1 larvae; MIG-6(S) activity is required cell nonautonomously for the ventral to dorsal phase of distal tip cell (DTC) migration and app…	86.71	Y			ENSG00000100767	PAPLN	Thrombospondin type-1 (TSP1) repeat
WBGene00015514	C06A8.3	C06A8.3 encodes, along with ZK970.7, one of two C. elegans proteins with similarity to the Onchocerca volvulus Ov17 hypodermal antigen.	85.78	Y			n/a	n/a	n/a
WBGene00008572	F08B12.4	none available	85.65	Y	Y		n/a	n/a	n/a
WBGene00044789	T07A9.14	none available	85.11				n/a	n/a	n/a
WBGene00020300	tag-261	none available	85.11			Y	ENSG00000176101	SSNA1	n/a
WBGene00004916	snr-3	snr-3 encodes an ortholog of human small nuclear ribonucleoprotein Sm D1, a protein that forms part of a heptameric complex required for biogenesis and function of the snRNPs that catalyze mRNA splicing; in combination with the gene that encodes the human Sm D2 ortholog (snr-4), snr-3 affects embryonic viability and nuclear association and localization of P granules in embryos, based on an RNAi a…	85.06	Y			ENSG00000167088	SNRPD1	LSM domain, eukaryotic/archaea-type
WBGene00000066	act-4	act-4 encodes an actin isoform that is most similar to act-2 in amino acid sequence; an act-4 reporter gene is expressed in body wall and vulval muscles and the spermatheca.	84.52	Y		Y	ENSG00000233917	POTEB	Actin family
WBGene00002268	lec-5	none available	84.51		Y		ENSG00000275572	GRIFIN	Galectin, carbohydrate recognition domain
WBGene00219383	Y61B8A.6	none available	84.38				n/a	n/a	n/a
WBGene00004990	spp-5	spp-5 encodes a caenopore, a saposin (B) domain-containing protein that is a member of the saposin-like protein (SAPLIP) superfamily containing mammalian NK-lysin and granulysin and the protozoan amoebapore-like proteins; SPP-5 exhibits pore-forming activity and functions as an effector of innate immunity, demonstrating antimicrobial activity against both Gram-positive and Gram-negative bacteria;…	83.81	Y			n/a	n/a	n/a
WBGene00000698	col-124	none available	82.39	Y			ENSG00000105327	BBC3	Nematode cuticle collagen, N-terminal
WBGene00006928	vit-4	none available	82.25			Y	n/a	n/a	n/a
WBGene00000753	col-180	none available	82.15				ENSG00000019169	MARCO	Nematode cuticle collagen, N-terminal
WBGene00000063	act-1	act-1 encodes an actin isoform that is required for proper body wall muscle and pharyngeal muscle structures and the motility of animals; actins have highly similar amino acid sequences; ACT-1 is identical to ACT-3; act-1 functions redundantly with two other actin isoforms, act-2 and act-3, to control cytoplasmic microfilament function in the early embryo.	80.88	Y			ENSG00000233917	POTEB	Actin family
WBGene00006728	ubq-2	ubq-2 encodes a bifunctional protein that contains two domains; an N-terminal ubiquitin peptide, and a C-terminal large ribosomal subunit protein L40 peptide.	80.64	Y			ENSG00000221983	UBA52	Ubiquitin domain
WBGene00000749	col-176	none available	79.21	Y			ENSG00000105327	BBC3	Nematode cuticle collagen, N-terminal
WBGene00006924	vig-1	vig-1 encodes a predicted RNA-binding protein orthologous to Drosophila VIG (Vasa Intronic Gene); vig-1 activity is required for proper function of the let-7 miRNA in vivo and thus, for regulating the transition from late larval to adult cell fates; VIG-1 is a component of the 250 kDa RNA-induced silencing complex (RISC) complex and co-immunoprecipates with both TSN-1, the C. elegans Tudor-SN ort…	78.9	Y	Y		ENSG00000142864	SERBP1	Hyaluronan/mRNA-binding protein
WBGene00006927	vit-3	vit-3 encodes a vitellogenin, a precursor of the lipid-binding protein related to vertebrate vitellogenins and mammalian ApoB-100, a core LDL particle constituent (OMIM:107730); VIT-3 is a major yolk component, but as loss of VIT-3 activity via RNA-mediated interference (RNAi) does not result in any abnormalities, VIT-3 likely functions redundantly with other vitellogenins to provide essential nu…	78.47				n/a	n/a	n/a
WBGene00019658	K11H12.1	none available	78.3			Y	ENSG00000178096	BOLA1	BolA protein
WBGene00000599	col-10	col-10 encodes a collagen protein; expressed exclusively in hypodermal cells	77.94				ENSG00000133661	SFTPD	Nematode cuticle collagen, N-terminal
WBGene00000065	act-3	act-3 encodes an invertebrate actin, highly similar to ACT-1, ACT-2, and ACT-4, that functions in body wall muscle; act-3 functions with two other action isoforms, act-1 and act-2, to control cytoplasmic microfilament function in the early embryo.	77.29	Y		Y	ENSG00000233917	POTEB	Actin family
WBGene00000229	atp-2	atp-2 encodes the beta subunit of the soluble, catalytic F1 portion of ATP synthase (mitochondrial respiratory chain [MRC] complex V); atp-2 activity is required for embryonic and larval development past the L3 stage, as well as for normal mobility, pharyngeal pumping, defecation, growth rate, and larval lifespan; in males, atp-2 activity is also required cell autonomously in male-specific sensor…	76.82	Y			ENSG00000110955	ATP5B	ATPase, F1/V1/A1 complex, alpha/beta subunit, nucleotide-binding domain
WBGene00016412	mrps-26	none available	76.82				ENSG00000125901	MRPS26	28S ribosomal protein S26
WBGene00016408	prmt-5	none available	76.82				ENSG00000100462	PRMT5	Protein arginine N-methyltransferase PRMT5
WBGene00004736	sca-1	The sca-1 gene encodes a sarco-endoplasmic reticulum Ca[2+] ATPase homolog that is required for development and muscle function; sca-1 is also a ortholog of human ATP2A1 (OMIM:108730), which when mutated leads to Darier-White disease (OMIM:124200).	75.7	Y	Y		ENSG00000064270	ATP2C2	P-type ATPase
WBGene00006359	swp-1	swp-1 encodes a protein containing two SWAP (Suppressor-of-White-APricot splicing regulator) domains that have been implicated in RNA binding; orthologous to C. briggsae CBG09000.	75.44			Y	ENSG00000061936	SFSWAP	SWAP/Surp
WBGene00003963	pdi-2	pdi-2 encodes a protein disulfide isomerase beta subunit; by homology, PDI-2 is predicted to function in oxidative protein folding in the endoplasmic reticulum (ER); PDI-2 activity is required for several organismal processes including body morphology, locomotion, fertility, molting, and collagen deposition; pdi-2 transcript levels are increased in response to ER stress; pdi-2 is expressed in the…	75.28	Y			ENSG00000155660	PDIA4	Disulphide isomerase
WBGene00017691	ilys-5	none available	75.12	Y			n/a	n/a	n/a
WBGene00000656	col-80	none available	74.53				ENSG00000133661	SFTPD	Nematode cuticle collagen, N-terminal
WBGene00000717	col-144	none available	73.77				ENSG00000133661	SFTPD	Nematode cuticle collagen, N-terminal
WBGene00006452	heh-1	tag-79/R148.6 is orthologous to human NPC2 (OMIM:601015, mutated in Niemann-Pick disease type C2)	72.84	Y	Y		ENSG00000119655	NPC2	MD-2-related lipid-recognition domain
WBGene00000216	asp-3	asp-3 encodes an aspartyl protease homolog that is required, in parallel with ASP-4 but downstream of CLP-1 and TRA-3, for degenerative (necrotic-like) cell death in neurons induced by mutations such as mec-4(d), deg-3(d), or gsa-1(gf).	72.3	Y			ENSG00000131401	n/a	Aspartic peptidase A1 family
WBGene00000670	col-95	col-95 encodes a collagen.	72.29				ENSG00000019169	MARCO	Nematode cuticle collagen, N-terminal
WBGene00000757	col-184	none available	72.16				ENSG00000133661	SFTPD	Nematode cuticle collagen, N-terminal
WBGene00017924	mrps-21	none available	72.11				ENSG00000266472	MRPS21	Ribosomal protein S21
WBGene00000699	col-125	none available	71.67				ENSG00000019169	MARCO	Nematode cuticle collagen, N-terminal
WBGene00000740	col-167	none available	71.55				ENSG00000019169	MARCO	Nematode cuticle collagen, N-terminal
WBGene00044784	F13H10.8	none available	71.55	Y			n/a	n/a	n/a
WBGene00013311	sec-61	none available	71.17	Y			ENSG00000058262	SEC61A1	SecY/SEC61-alpha family
WBGene00009119	ndk-1	none available	71.16	Y	Y		ENSG00000123009	n/a	Nucleoside diphosphate kinase
WBGene00007219	nlp-38	none available	70.92	Y			n/a	n/a	n/a
WBGene00000693	col-119	none available	69.4				ENSG00000133661	SFTPD	Nematode cuticle collagen, N-terminal
WBGene00000883	cyn-7	cyn-7 encodes a cyclophilin A isoform; while not tested for peptidyl-prolyl isomerase activity in vitro, it is very similar to CYN-3 and closely resembles the prototypical CypA, and is therefore likely to be a member of the cytosolic CsA-binding cyclophilin subfamily; CYN-7 was required for embryonic viability in one set of mass RNAi assays.	69.07	Y			ENSG00000279782	PPIAL4F	Cyclophilin-type peptidyl-prolyl cis-trans isomerase domain
WBGene00000716	col-143	none available	68.51				ENSG00000133661	SFTPD	Nematode cuticle collagen, N-terminal
WBGene00020662	T21H3.1	none available	68.46	Y			n/a	n/a	n/a
WBGene00019999	srab-14	none available	68.13				n/a	n/a	n/a
WBGene00018519	F46H5.3	none available	67.88	Y			ENSG00000237289	CKMT1B	ATP:guanido phosphotransferase
WBGene00018522	F46H5.7	none available	67.88	Y			n/a	n/a	n/a
WBGene00000602	col-13	col-13 encodes a collagen which is expressed in all stages of development, like sqt-3 (col-1), col-3, col-10, col-11, col-12, and col-14; collagen genes with this expression profile may be specifically required to construct the L1 cuticle (and, perhaps, less specifically required for cuticles at other stages); the amino- and carboxyl-terminal cysteine-rich regions of COL-13 are most closely relat…	67.67				ENSG00000019169	MARCO	Nematode cuticle collagen, N-terminal
WBGene00017201	grsp-4	none available	67.51				n/a	n/a	n/a
WBGene00019322	ahcy-1	ahcy-1 encodes the C. elegans S-adenosylhomocysteine hydrolase (SAHH) ortholog; by homology, AHCY-1 is predicted to catalyze the hydrolysis of S-adenosyl-L-homocysteine to adenosine and L-homocysteine; loss of ahcy-1 activity via RNAi results in embryonic and larval lethality, abnormal body morphology, sick animals, and uncoordinated locomotion; Northern blot analyses indicate the ahcy-1 mRNA is …	67.19	Y		Y	ENSG00000168710	AHCYL1	Adenosylhomocysteinase
WBGene00004924	snt-4	none available	66.56	Y		Y	ENSG00000019505	SYT13	C2 domain
WBGene00001635	gly-10	none available	66.2	Y			ENSG00000174473	GALNTL6	Ricin B, lectin domain
WBGene00011156	R09B3.3	none available	65.68	Y			ENSG00000102317	RBM3	RNA recognition motif domain
WBGene00000669	col-94	none available	65.35	Y			ENSG00000133661	SFTPD	Nematode cuticle collagen, N-terminal
WBGene00006725	ubl-1	ubl-1 encodes a protein similar to Drosophila ubiquitin/ ribosomal protein S27a that affects body length, fertility, and larval viability.	65.04	Y			ENSG00000143947	RPS27A	Ubiquitin domain
WBGene00000601	col-12	col-12 encodes a member of the collagen superfamily containing collagen triple helix repeats (20 copies); expressed throughout development but expression peaks after each larval molt when new cuticle is being secreted and deposited, and after the L4 to adult larval molt.	64.85				ENSG00000019169	MARCO	Nematode cuticle collagen, N-terminal
WBGene00045386	C02B4.4	none available	64.55				n/a	n/a	n/a
WBGene00006925	vit-1	none available	63.62			Y	n/a	n/a	n/a
WBGene00010419	H28O16.1	H28O16.1 encodes the C. elegans ortholog of the alpha subunit of mitochondrial ATP synthase.	62.87	Y			ENSG00000152234	ATP5A1	ATPase, F1/V1/A1 complex, alpha/beta subunit, nucleotide-binding domain
WBGene00006910	vha-1	vha-1 encodes an ortholog of subunit c of the membrane-bound (V0) domain of vacuolar proton-translocating ATPase (V-ATPase); VHA-1 is a predicted V-ATPase transmembrane rotor component; VHA-1 and VHA-2/3 comprise a closely related family of subunit c co-orthologs, predicted to carry protons from the cytosol to a-subunits (VHA-5, VHA-6, VHA-7, or UNC-32) for transmembrane export; VHA-1, like VHA-1…	62.65	Y		Y	ENSG00000185883	ATP6V0C	V-ATPase proteolipid subunit
WBGene00014793	H40L08.2	none available	62.33	Y			n/a	n/a	n/a
WBGene00010882	atg-7	atg-7 encodes an E1 ubiquitin-activating-like enzyme orthologous to the autophagic budding yeast protein Apg7p; ATG-7 is required for normal dauer morphogenesis and autophagy in daf-2 mutant animals.	61.63			Y	ENSG00000197548	ATG7	THIF-type NAD/FAD binding fold
WBGene00002344	let-70	let-70 encodes a class I E2 ubiquitin conjugating enzyme; let-70 was identified in screens for essential genes and phenotypic analyses indicate that loss of let-70 activity results in embryonic and larval lethality with defects in sarcomere assembly; purified LET-70 can stimulate the self-ubiquitylation activities of CHN-1 and UFD-2, E4 ubiquitin conjugation factors and, in addition, can stimulat…	61.63	Y			ENSG00000072401	UBE2D1	Ubiquitin-conjugating enzyme E2
WBGene00000667	col-92	none available	61.29	Y			ENSG00000133661	SFTPD	Nematode cuticle collagen, N-terminal
WBGene00016918	test-1	none available	61.19		Y		ENSG00000152377	SPOCK1	Thyroglobulin type-1
WBGene00013489	col-42	none available	59.27	Y			ENSG00000019169	MARCO	Nematode cuticle collagen, N-terminal
WBGene00015558	C06G4.4	none available	58.96				n/a	n/a	n/a
WBGene00018846	eef-1B.1	none available	58.96	Y			ENSG00000283391	EEF1B2	Glutathione S-transferase, C-terminal-like
WBGene00017120	tctn-1	none available	58.08			Y	ENSG00000204852	TCTN1	Domain of unknown function DUF1619
WBGene00010814	M01F1.8	none available	57.77	Y		Y	n/a	n/a	n/a
WBGene00000739	col-166	none available	57.6				ENSG00000019169	MARCO	Nematode cuticle collagen, N-terminal
WBGene00010440	ttr-51	none available	57.02	Y	Y		n/a	n/a	n/a
WBGene00000915	daf-21	daf-21 encodes a member of the Hsp90 family of molecular chaperones; DAF-21 activity is required for larval development, negative regulation of dauer larva formation, and a number of specific chemosensory behaviors, such as the response to chemicals and odorants detected by the ASE and AWC sensory neurons; a daf-21 sensory defect can be rescued by a cyclic GMP analogue, suggesting that, in regula…	56.43	Y			ENSG00000183199	n/a	Heat shock protein Hsp90 family
WBGene00000370	ccg-1	none available	55.59	Y	Y		n/a	n/a	n/a
WBGene00011273	R53.4	R53.4 encodes a mitochondrial ATP synthase subunit f homolog; R53.4 is predicated to be a member of the F(1)F(0)ATP synthase required for ATP synthesis; R53.4 is also required for expression of antimicrobial peptides in response to infection.	55.09	Y			ENSG00000241468	ATP5J2	Mitochondrial F1-F0 ATP synthase subunit F, predicted
WBGene00019536	rpi-2	rpi-2 is orthologous to human RP2 (OMIM:312600, mutated in retinitis pigmentosa 2), and paralogous to human TBCC (OMIM:602971) and Y71H2AM.24; RPI-2 localizes to the periciliary membrane compartment beneath the ciliary base.	55.01				ENSG00000102218	RP2	CARP motif
WBGene00000609	col-20	col-20 encodes a collagen; its expression pattern and mutant phenotypes are unknown.	54.83				n/a	n/a	n/a
WBGene00012553	cco-2	cco-2 encodes the C. elegans ortholog of the cytochrome c oxidase (COX) subunit Va (COX Va); loss of cco-2 activity via RNAi results in a shortened life span, reduced fertility, and defects in mitochondrial respiratory chain function.	54.73	Y			ENSG00000178741	COX5A	Cytochrome c oxidase, subunit Va/VI
WBGene00017003	D1007.5	none available	54.46			Y	ENSG00000121775	TMEM39B	Uncharacterised protein family TMEM39
WBGene00002978	lev-11	lev-11 encodes tropomyosin, an actin-binding contractile structural protein orthologous to human TROPOMYOSIN 1 (TPM1; OMIM:191010), which when mutated leads to familial hypertrophic cardiomyopathy; LEV-11 is required for embryonic development, normal body morphology, and locomotion; expressed as multiple tissue-specific isoforms generated by alternative mRNA splicing and promoter use, LEV-11 is d…	54.33	Y	Y		ENSG00000198467	TPM2	Tropomyosin
WBGene00000751	col-178	none available	54.21			Y	ENSG00000019169	MARCO	Nematode cuticle collagen, N-terminal
WBGene00006363	syd-1	syd-1 encodes a protein that contains a Rho-GTPase-like activating domain as well as PDZ and C2 domains; during neuronal development, SYD-1 is required cell autonomously to positively regulate synaptogenesis; in regulating synapse development, SYD-1 functions as a positive regulator of SYD-2/liprin through direct interaction with ELKS-1, a pre-synaptic protein also required for synapse developmen…	53.98				ENSG00000097096	SYDE2	C2 domain
WBGene00007223	C01F6.9	The C01F6.9 gene resides in an operon that also contains the genes icl-1 and lpl-1.	53.88				ENSG00000120963	ZNF706	Uncharacterised protein family SERF
WBGene00006307	suf-1	none available	53.7				ENSG00000176102	CSTF3	HAT (Half-A-TPR) repeat
WBGene00000741	col-168	none available	53.24				ENSG00000019169	MARCO	Nematode cuticle collagen, N-terminal
WBGene00010042	bcs-1	F54C9.6 encodes a protein orthologous to the human mitochondrial protein BCS1 (YEAST HOMOLOG)-LIKE (BCS1L; OMIM:603647); mutation of BCS1L leads to neonatal tubulopathy, encephalopathy, and liver failure, or to GRACILE syndrome.	52.33		Y	Y	ENSG00000074582	BCS1L	AAA+ ATPase domain
WBGene00015248	mai-2	mai-2/B0546.1 is orthologous to mitochondrial intrinsic ATPase inhibitor protein (IF(1)), which blocks reverse action (ATP hydrolysis) by F(0)F(1)-ATPase when its (normally required) proton gradient is lost; MAI-2 has a mitochondrial import signal at its N-terminus, and is transported to yeast mitochondria; MAI-2 can inhibit yeast F(0)F(1)-ATPase, and this inhibition is pH-dependent; MAI-2"s tert…	52.1	Y	Y		ENSG00000130770	ATPIF1	Mitochondrial ATPase inhibitor
WBGene00002064	iff-1	iff-1 encodes an eIF-5A homolog that affects fertility and is required for germ cell proliferation and for some P granule components to localize properly; expression is germline specific and mRNA is expressed in the distal region of gonads where germ cells actively proliferate.	51.4				ENSG00000132507	EIF5A	Translation elongation factor IF5A
WBGene00000781	cpr-1	cpr-1 encodes a cysteine protease of the cathepsin B-like cysteine protease family; cpr-1 appears to be required for embryogenesis; cpr-1 is specifically expressed in the gut of all stages except the embryo and around developing embryos in the gonad; expression of cpr-1 is regulated by three promoter GATA motifs.	50.17	Y	Y		ENSG00000164733	CTSB	Peptidase C1A, papain C-terminal
WBGene00011258	best-15	none available	49.96				ENSG00000127325	BEST3	Bestrophin
WBGene00002007	hsp-3	hsp-3 encodes one of two C. elegans heat shock response 70 (hsp70) proteins homologous to mammalian grp78/BiP (glucose regulated protein 78/immunoglobulin heavy chain-binding protein, OMIM:138120); HSP-3 likely functions as a molecular chaperone, and is expressed constitutively (expression is not heat inducible) throughout development with greatest abundance during the L1 larval stage; hsp-3 tran…	49.74	Y			ENSG00000226704	HSPA1L	Heat shock protein 70 family
WBGene00000720	col-147	none available	49.65				ENSG00000133661	SFTPD	Nematode cuticle collagen, N-terminal
WBGene00022645	ZK6.11	none available	48.84				n/a	n/a	n/a
WBGene00015340	C02E7.7	none available	48.64				n/a	n/a	n/a
WBGene00003762	nlp-24	none available	48.34	Y		Y	n/a	n/a	n/a
WBGene00004995	spp-10	spp-10 encodes two protein isoforms that are orthologous to the human gene PROSAPOSIN (PSAP; OMIM:176801, mutated in Gaucher disease and metachromatic leukodystrophy); SPP-10A and -10B are predicted to have 3 and 4 embedded saposin sequences, that are likely to be split into individual saposin peptides by proteolysis; in mammals, saposins activate the enzymes sphingomyelinphosphodiesterase and be…	48.2	Y	Y		ENSG00000178597	PSAPL1	Saposin-like type B, region 1
WBGene00000219	asp-6	aspartic protease.	48.04	Y			ENSG00000256713	PGA5	Aspartic peptidase A1 family
WBGene00000673	col-98	none available	47.79				n/a	n/a	n/a
WBGene00020886	ttr-6	none available	47.57	Y			n/a	n/a	n/a
WBGene00003594	nft-1	The nft-1 gene encodes an ortholog of human FHIT, which when mutated is associated with head and neck cancers (OMIM:601153).	47.32				ENSG00000114021	NIT2	Histidine triad (HIT) protein
WBGene00013238	trap-4	none available	47.32	Y			ENSG00000180879	SSR4	Translocon-associated
WBGene00013239	Y56A3A.22	none available	47.32				ENSG00000177150	FAM210A	Domain of unknown function DUF1279
WBGene00000608	col-19	col-19 encodes a member of the collagen superfamily containing collagen triple helix repeats (20 copies) that is required for normal structure of the alae; expressed during the L2-to-dauer and L4-to-adult molts with strongest expression in adult animals.	47.19				ENSG00000133661	SFTPD	Nematode cuticle collagen, N-terminal
WBGene00000881	cyn-5	cyn-5 encodes a cyclophilin that is functional in vitro and is predicted to be a secreted protein that is structurally most similar to human cyclophilin B; expressed in the intestine.	46.9	Y			ENSG00000168938	PPIC	Cyclophilin-type peptidyl-prolyl cis-trans isomerase domain
WBGene00003964	pdi-3	pdi-3 encodes a protein disulfide isomerase (PDI) required for normal cuticle collagen deposition and, subliminally, for maintenance of normal body shape; PDI-3 has both PDI and calcium-dependent transglutaminase activity in vitro, crosslinking proteins through a gamma-glutamyl epsilon-lysine dual residue; PDI-3 is homologous to the human PDI ERp60, as well as a homolog in the dog heartworm Dirof…	46.4	Y			ENSG00000155660	PDIA4	Disulphide isomerase
WBGene00004798	sip-1	sip-1 encodes a member of the small heat shock family of proteins; loss of sip-1 function via antisense or large-scale RNAi experiments results in embryonic lethality and in a small but reproducible reduction in lifespan in otherwise long-lived animals, respectively, suggesting that sip-1 plays a role in embryonic development as well as regulation of adult lifespan; in addition, expression of sip…	46.26	Y			ENSG00000170276	HSPB2	Alpha crystallin/Heat shock protein
WBGene00000742	col-169	none available	46.11				ENSG00000019169	MARCO	Nematode cuticle collagen, N-terminal
WBGene00002187	kgb-1	kgb-1 encodes a serine/threonine kinase that is a member of the JNK (Jun-N-terminal kinase) subfamily of MAP (mitogen-activated protein)kinases; loss of kgb-1 activity results in temperature-sensitive sterility in hermaphrodites and males; in hermaphrodites, this sterility is associated with disorganized gonads and endomitotic oocytes that have likely failed to undergo oocyte maturation; in kgb-1…	46.01				n/a	n/a	n/a
WBGene00003934	pat-10	pat-10 encodes body wall muscle troponin C, the calcium-binding component of the troponin complex of actin thin filaments; PAT-10 is essential for muscle contraction and thus for completion of embryonic morphogenesis and elongation; by homology, PAT-10 likely functions to regulate body wall muscle contraction in response to changes in intracellular calcium; PAT-10 is expressed in body wall muscle…	45.76	Y	Y		ENSG00000203666	EFCAB2	EF-hand domain
WBGene00017506	F16B4.4	none available	45.57	Y			n/a	n/a	n/a
WBGene00010963	nduo-4	The nduo-4 gene resides on the mitochondrial chromosome, and encodes the protein NADH-ubiquinone oxidoreductase chain 4; this is the C. elegans homolog of the core MT-ND4 subunit of mitochondrial NADH:ubiquinone oxidoreductase (Complex I).	45.57			Y	ENSG00000198886	MT-ND4	NADH:quinone oxidoreductase/Mrp antiporter, membrane subunit
WBGene00019774	M04G7.3	none available	45.34				n/a	n/a	n/a
WBGene00000719	col-146	none available	45.26				ENSG00000133661	SFTPD	Nematode cuticle collagen, N-terminal
WBGene00014252	ZK1320.2	none available	44.52				n/a	n/a	n/a
WBGene00001137	eat-6	eat-6 encodes an ortholog of the alpha subunit of a sodium/potassium ATPase, which in turn affects Na+,K(+)-ATPase activity of membranes by affecting the level of the phosphorylated intermediate of the Na+,K(+)-ATPase; EAT-6 affects relaxation of the pharyngeal muscles, fertility (and thus affects feeding); EAT-6 also affects body length, life span, and ASE, ASI and ASJ axonal outgrowth.	44.01	Y			ENSG00000105675	ATP4A	P-type ATPase
WBGene00000218	asp-5	none available	43.7	Y			ENSG00000256713	PGA5	Aspartic peptidase A1 family
WBGene00000896	dad-1	dad-1 encodes an ortholog of human DAD1 (OMIM:600243) that inhibits cell death and can functionally complement the hamster protein in cultured cells.	43.69				ENSG00000129562	DAD1	DAD/Ost2
WBGene00019007	F57B10.14	none available	43.69				n/a	n/a	n/a
WBGene00000822	csq-1	csq-1 encodes a calsequestrin that is required to normal survival in media containing either excess or deficient Ca[2+], and that also binds UNC-68"s intraluminal domain; CSQ-1 binds Ca[2+] in vitro, and is thought to buffer Ca[2+] stores in sarcoplasmic reticulum; CSQ-1 is expressed in bodywall muscle cells from mid-embryogenesis to adulthood, as well as in vulval muscles, and in the isthmus and…	43.63	Y	Y		ENSG00000118729	CASQ2	Calsequestrin
WBGene00019780	M60.4	none available	43.33	Y		Y	n/a	n/a	n/a
WBGene00003371	mlc-3	mlc-3 encodes an essential myosin light chain; large-scale RNAi screens indicate that mlc-3 activity is required for both embryonic and postembryonic development, as well as for normal locomotion and egg laying.	43.21	Y	Y		ENSG00000198336	MYL4	EF-hand domain
WBGene00000671	col-96	none available	43.08				ENSG00000133661	SFTPD	Nematode cuticle collagen, N-terminal
WBGene00000784	cpr-4	cpr-4 encodes a cathepsin B-like cysteine protease expressed at all life stages.	43.06	Y			ENSG00000164733	CTSB	Peptidase C1A, papain C-terminal
WBGene00000703	col-129	none available	43.02	Y			ENSG00000133661	SFTPD	Nematode cuticle collagen, N-terminal
WBGene00206464	F59C6.18	none available	42.84				n/a	n/a	n/a
WBGene00013255	Y57A10A.10	none available	42.65		Y		ENSG00000095209	TMEM38B	TRIC channel
WBGene00021625	Y47D7A.13	none available	42.51				n/a	n/a	n/a
WBGene00003370	mlc-2	mlc-2 encodes, along with mlc-1 and mlc-4, one of three C. elegans regulatory myosin light chains; MLC-2 is predicted to function as a regulator of myosin ATPase activity, and genetic studies indicate that MLC-2 is nearly essential in hermaphrodites for normal pharyngeal muscle function, but redundant with MLC-1, with which it is nearly identical, for proper bodywall muscle development; according…	42.43	Y	Y		ENSG00000111245	MYL2	EF-hand domain
WBGene00000718	col-145	none available	41.83				ENSG00000133661	SFTPD	Nematode cuticle collagen, N-terminal
WBGene00009058	F22E12.1	none available	41.74		Y		ENSG00000121064	SCPEP1	Peptidase S10, serine carboxypeptidase
WBGene00012530	Y32F6A.5	none available	41.74		Y		ENSG00000121064	SCPEP1	Peptidase S10, serine carboxypeptidase
WBGene00000251	bli-1	The bli-1 gene encodes an unusual cuticular collagen that is required for proper strut formation within the unique medial layer of the adult cuticle; bli-1 interacts genetically with other cuticular collagens such as bli-2 and rol-1, and may be processed for secretion by BLI-4, a Kex2/subtilisin serine endoproteinase; consistent with its role in adult cuticle formation, bli-1 mRNA is highly expre…	41.37				ENSG00000133661	SFTPD	Nematode cuticle collagen, N-terminal
WBGene00022169	Y71H2AM.4	none available	41.25	Y			n/a	n/a	n/a
WBGene00022170	Y71H2AM.5	none available	41.25	Y			ENSG00000160471	COX6B2	Cytochrome c oxidase, subunit VIb
WBGene00000170	aqp-2	aqp-2 encodes, by alternative splicing, two isoforms of an biochemically atypical aquaglyceroporin; when expressed in Xenopus oocytes, AQP-2 increases water permeability 5- to 11-fold, and urea permeability 4.5-fold, but has no effect on glycerol permeability; AQP-2::GFP fusion proteins are expressed predominantly in the excretory cell and more weakly in muscle, motor neurons, and hypodermis; AQP…	41.15	Y			ENSG00000171885	AQP4	Major intrinsic protein
WBGene00000785	cpr-5	cpr-5 encodes a cysteine protease.	41.06				ENSG00000164733	CTSB	Peptidase C1A, papain C-terminal
WBGene00010966	nduo-3	The nduo-3 gene resides on the mitochondrial chromosome, and encodes the protein NADH-ubiquinone oxidoreductase chain 3; this is the C. elegans homolog of the core MT-ND3 of mitochondrial NADH:ubiquinone oxidoreductase (Complex I).	40.99			Y	n/a	n/a	n/a
WBGene00010967	nduo-5	The nduo-5 gene resides on the mitochondrial chromosome, and encodes the protein NADH-ubiquinone oxidoreductase chain 5; this is the C. elegans homolog of the core MT-ND5 of mitochondrial NADH:ubiquinone oxidoreductase (Complex I).	40.99			Y	ENSG00000198786	MT-ND5	NADH:quinone oxidoreductase/Mrp antiporter, membrane subunit
WBGene00006946	prx-10	This is a complicated gene locus that produces two distinct gene products, prx-10 and wars-2/wrs-2; transcription of this locus produces a large primary transcript containing the coding potential for functionally different proteins; the transcript can be processed (by an unknown mechanism) to allow for the translation of either the 5" (PRX-10) gene product or the 3" (WARS-2) gene product; prx-10 …	40.97				ENSG00000116874	WARS2	Zinc finger, RING-type
WBGene00002065	iff-2	none available	40.89	Y		Y	ENSG00000132507	EIF5A	Translation elongation factor IF5A
WBGene00015102	cpg-2	cpg-2 encodes a chondroitin proteoglycan with six chitin-binding peritrophin-A domains and three mucin-like regions; CPG-2 is individually dispensable for normal embryonic development; however, CPG-2 and CPG-1 are jointly required for osmotic integrity of early embryos, error-free chromosomal segregation during meiosis, polar body extrusion, association of the sperm pronucleus/centrosome complex …	40.76	Y			n/a	n/a	n/a
WBGene00006466	tag-115	none available	40.71			Y	ENSG00000168061	SAC3D1	SAC3/GANP/THP3
WBGene00021546	laat-1	none available	40.35				ENSG00000174899	PQLC2L	PQ-loop repeat
WBGene00001426	fkb-1	fkb-1 encodes a homolog of mouse FK506-binding protein 2.	39.93	Y			ENSG00000173486	FKBP2	FKBP-type peptidyl-prolyl cis-trans isomerase domain
WBGene00004238	ptr-24	ptr-24 encodes a nematode-specific member of the sterol sensing domain (SSD) proteins, distantly paralogous to Drosophila PATCHED (PTC) and human PTCH (OMIM:601309, mutated in basal cell nevus syndrome); PTR-24 has no known function in vivo.	39.51		Y	Y	n/a	n/a	n/a
WBGene00021351	Y37E3.10	none available	39.22	Y			ENSG00000134001	EIF2S1	S1 domain
WBGene00011561	ttr-15	none available	39.1	Y			n/a	n/a	n/a
WBGene00000786	cpr-6	none available	38.96	Y			ENSG00000164733	CTSB	Peptidase C1A, papain C-terminal
WBGene00003836	nxt-1	none available	38.65				ENSG00000132661	NXT1	Nuclear transport factor 2
WBGene00022122	trap-1	none available	38.65	Y			ENSG00000124783	SSR1	Translocon-associated protein (TRAP), alpha subunit
WBGene00019357	cpg-8	cpg-8 encodes, by alternative splicing, two putatively secreted small proteins of 115 and 99 residues; the large CPG-8 isoform has 6 potential chondroitin attachment sites, 5 of them verified by mass spectrometry; CPG-8 has no obvious function in mass RNAi assays.	38.64	Y			n/a	n/a	n/a
WBGene00003093	lys-4	none available	38.43	Y		Y	n/a	n/a	n/a
WBGene00022653	ZK105.1	none available	38.41				n/a	n/a	n/a
WBGene00018491	mdh-1	mdh-1 encodes a malate dehydrogenase; by homology, MDH-1 is predicted to function to reversibly catalyze the formation of oxaloacetate from malate.	38.3	Y			ENSG00000138400	MDH1B	Lactate/malate dehydrogenase, N-terminal
WBGene00001169	eef-1A.2	eef-1A.2 encodes a translation elongation factor 1-alpha homolog that is required for embryonic viability, fertility, and a normal postembryonic growth rate; eef-1A.2 encodes at least one alternatively spliced coding sequence identical to that of eef-1A.1.	38.2	Y		Y	ENSG00000156508	EEF1A1	Transcription factor, GTP-binding domain
WBGene00000273	brp-1	brp-1 encodes a glutamine-rich protein that is conserved in nematodes, but that has no known homologies or sequence motifs; BRP-1 is able to bypass the need for the S. cerevisiae mating pheromone MAP kinase cascade to activate the mating pheromone-responsive gene FUSl.	38.14	Y			n/a	n/a	n/a
WBGene00008131	C47B2.2	C47B2.2 encodes, by alternative splicing, two isoforms of a uracil phosphoribosyltransferase (UPRTase) homolog, orthologous to human UPRT (OMIM:300656) and budding yeast Fur1p; however, C47B2.2 lacks two normally conserved residues in its putative uracil-binding domain, and is thus predicted (like human UPRT) to lack UPRTase activity; C47B2.2"s actual substrates are unknown.	38.13	Y			ENSG00000198276	UCKL1	Phosphoribosyltransferase-like
WBGene00006529	tba-2	tba-2 encodes an alpha-tubulin.	38.13	Y	Y	Y	ENSG00000214391	n/a	Tubulin
WBGene00019900	vdac-1	none available	38.05	Y			ENSG00000213585	VDAC1	Porin, eukaryotic type
WBGene00020230	nep-2	T05A8.4 encodes a neprilysin; neprilysins are thermolysin-like zinc metallopeptidases, found on the outer surface of animal cells, that negatively regulate small signalling peptides (e.g., enkephalin, tachykinin, insulin, and natriuretic peptides) by cleaving them; while T05A8.4 is an ortholog of mammalian neutral endopeptidase (NEP), expressed on the brush-border membranes of kidney; more genera…	37.89	Y		Y	ENSG00000277131	MMEL1	Peptidase M13
WBGene00020229	T05A8.3	none available	37.89				n/a	n/a	n/a
WBGene00001684	gpd-2	gpd-2 encodes one of four C. elegans glyceraldehyde-3-phosphate dehydrogenases (GAPDHs); by homology, GPD-2 is predicted to reversibly catalyze the oxidation and phosphorylation of glyceraldehyde-3-phosphate to 1,3-diphosphoglycerate during glycolysis; in C. elegans, GPD-2 and GPD-3 constitute the major GAPDH isoenzymes and are expressed at highest levels during postembryonic development, primari…	37.81	Y	Y		ENSG00000105679	GAPDHS	Glyceraldehyde-3-phosphate dehydrogenase, type I
WBGene00001685	gpd-3	gpd-3 encodes a predicted glyceraldehyde 3-phosphate dehydrogenase that affects embryonic viability; GPD-3 interacts with LIN-2 in two-hybrid assays.	37.81	Y	Y		ENSG00000105679	GAPDHS	Glyceraldehyde-3-phosphate dehydrogenase, type I
WBGene00003124	mai-1	mai-1 is homologous to mitochondrial intrinsic ATPase inhibitor protein (IF(1)), which blocks reverse action (ATP hydrolysis) by F(0)F(1)-ATPase when its (normally required) proton gradient is lost; MAI-1 lacks an obvious mitochondrial import signal at its N-terminus, and is not transported to yeast mitochondria; MAI-1 may be cytosolic in vivo, regulating cytosolic ATPase(s); MAI-1 can inhibit ye…	37.81	Y	Y		ENSG00000130770	ATPIF1	Mitochondrial ATPase inhibitor
WBGene00000779	cpn-3	cpn-3 encodes a calponin homolog, most closely related to its paralog CPN-4 in C. elegans; CPN-3 is more similar to the calponin paralogs transgelin (SM22 alpha) or neuronal protein NP25 than to calponin per se.	37.52	Y	Y		ENSG00000158710	TAGLN2	Calponin homology domain
WBGene00016627	C44B7.5	none available	37.45	Y			n/a	n/a	n/a
WBGene00022644	dod-19	none available	37.42				n/a	n/a	n/a
WBGene00000743	col-170	none available	37.17				ENSG00000019169	MARCO	Nematode cuticle collagen, N-terminal
WBGene00011977	T24B8.3	none available	36.84	Y			n/a	n/a	n/a
WBGene00011015	R04F11.2	none available	36.49	Y			n/a	n/a	n/a
WBGene00000263	F23H11.5	none available	36.46	Y		Y	n/a	n/a	n/a
WBGene00010204	F57F5.1	none available	36.4	Y			ENSG00000164733	CTSB	Peptidase C1A, papain C-terminal
WBGene00044080	D1086.10	none available	36.38				n/a	n/a	n/a
WBGene00012383	ttr-17	none available	36.33	Y	Y		n/a	n/a	n/a
WBGene00017128	E04F6.9	none available	36.1			Y	n/a	n/a	n/a
WBGene00011304	mnk-1	mnk-1 encodes the C. elegans ortholog of the Mnk MAP kinase-interacting kinase	35.7	Y		Y	ENSG00000079277	MKNK1	Protein kinase domain
WBGene00011028	R05D7.3	none available	35.55	Y			n/a	n/a	n/a
WBGene00000465	cpg-1	cpg-1 encodes, by alternative splicing, two isoforms of a chondroitin proteoglycan; CPG-1 contains three chitin-binding peritrophin-A domains and two mucin-like regions; CPG-1 is individually dispensable for normal embryonic development; however, CPG-1 and CPG-2 are jointly required for osmotic integrity of early embryos, error-free chromosomal segregation during meiosis, polar body extrusion, as…	35.5	Y			n/a	n/a	n/a
WBGene00018393	msra-1	msra-1 encodes a methionine sulfoxide-S-reductase (MsrA) with experimentally confirmed activity.	35.4				ENSG00000175806	MSRA	Peptide methionine sulphoxide reductase MsrA
WBGene00020842	T27A3.6	T27A3.6 is orthologous to the human gene Molybdenum cofactor synthesis gene 2 (MOCS2), which encodes molybdenum cofactor synthesis protein 2A and molybdenum cofactor synthesis protein 2B, which dimerize to form molybdopterin synthase.	35.03	Y			ENSG00000106733	NMRK1	Molybdopterin biosynthesis MoaE
WBGene00008262	ril-1	none available	34.92	Y			n/a	n/a	n/a
WBGene00000678	col-104	none available	34.8			Y	ENSG00000240654	C1QTNF9	Nematode cuticle collagen, N-terminal
WBGene00000677	col-103	col-103 encodes a collagen.	34.79				n/a	n/a	n/a
WBGene00003902	pab-1	pab-1 encodes a polyadenylate-binding protein (i.e., poly(A)-binding protein, or PAB); pab-1 is essential for germline proliferation, regulation of adult lifespan, and normal body size; PAB-1 forms a complex with ATX-2, the C. elegans ataxin 2 ortholog, which is also required for germline development; PAB-1 has been successfully used as an epitope-tagged transgenic reagent for tissue-specific iso…	34.63	Y			ENSG00000254535	PABPC4L	RNA recognition motif domain
WBGene00009621	fipr-21	none available	34.48				n/a	n/a	n/a
WBGene00003169	mec-5	mec-5 encodes a collagen unique in the number of Gly-X-Y repeats and in the composition of amino acids surrounding these repeats; MEC-5 is required for normal mechanosensory response to gentle touch and for the proper functioning of the touch receptor neurons; mec-5 interacts genetically with mec-4 and mec-10 which encode degenerins (ion channels) expressed in the touch neurons, mec-9, which enco…	34.41		Y		ENSG00000197467	COL13A1	Collagen triple helix repeat
WBGene00011480	enpl-1	enpl-1 encodes the C. elegans ortholog of the Hsp90 family member and endoplasmic reticulum (ER) chaperone GRP94/GP96; loss of enpl-1 activity via RNAi results in slow growth, larval arrest, uncoordinated locomotion, and weak endocytosis defects; in addition, loss of enpl-1 expression results in an increase in hsp-4 expression, revealing compensatory regulation amongst ER chaperones; an enpl-1::g…	34.35	Y		Y	ENSG00000183199	n/a	Heat shock protein Hsp90 family
WBGene00000067	act-5	act-5 encodes an ortholog of human cytoplasmic actin; act-5 is required for formation of the terminal web and microvilli on the apical surface of intestinal cells; act-5 also plays a role in mediating non-lytic exit of intracellular parasites from the intestine; act-5 is expressed only in intestinal cells and in the excretory cell; in the intestine, ACT-5 localizes to microvilli and the terminal …	34.28	Y			ENSG00000233917	POTEB	Actin family
WBGene00020471	pho-14	none available	34.27				ENSG00000142513	ACPT	Histidine phosphatase superfamily, clade-2
WBGene00006434	prdx-2	prdx-2 encodes one of two C. elegans typical 2-Cys peroxiredoxins, peroxidase enzymes that reduce hydrogen peroxide and contribute to the oxidative-stress response of multicellular organisms; loss of prdx-2 activity results in increased sensitivity to sublethal doses of hydrogen peroxide and increased resistance to heavy metals, likely via increased expression of Phase II detoxification enzymes s…	34.24	Y			ENSG00000123131	PRDX4	Alkyl hydroperoxide reductase subunit C/ Thiol specific antioxidant
WBGene00008504	F01G4.5	none available	34.02			Y	ENSG00000007541	PIGQ	N-acetylglucosaminyl transferase component
WBGene00008505	F01G4.6	none available	34.02		Y		ENSG00000075415	SLC25A3	Mitochondrial substrate/solute carrier
WBGene00000707	col-133	none available	33.89				ENSG00000019169	MARCO	Nematode cuticle collagen, N-terminal
WBGene00008603	F09B9.4	none available	33.76		Y		n/a	n/a	n/a
WBGene00001067	dpy-5	dpy-5 encodes a Group I cuticle procollagen; dpy-5 activity is required for wild-type body length, cuticle structure (width of the annuli), postembryonic growth rates, and reproduction; dpy-5 is described as an intermediate collagen gene, as its mRNA, which is present in all larval stages, adults, and dauer larvae, increases in abudance two hours prior to the secretion of each new cuticle; a dpy-…	33.55			Y	ENSG00000133661	SFTPD	Nematode cuticle collagen, N-terminal
WBGene00004336	ret-1	none available	33.46	Y			ENSG00000274803	BDP1	Reticulon
WBGene00014095	gdh-1	gdh-1 encodes a glutamate dehydrogenase, required in mass RNAi assays for normal fertility and rapid growth, that is expressed in larval and adult pharynx, intestine, and rectal gland cells; GDH-1 is orthologous to human GLUD1 (OMIM:138130, mutated in hyperinsulinemic hypoglycemia and hyperammonemia) and GLUD2 (OMIM:300144).	33.44	Y	Y		ENSG00000182890	GLUD2	Glutamate/phenylalanine/leucine/valine dehydrogenase
WBGene00015339	C02E7.6	none available	33.31	Y			n/a	n/a	n/a
WBGene00003369	mlc-1	mlc-1 encodes a muscle regulatory myosin light chain that is nearly identical to MLC-2 and functions redundantly with MLC-2 in the body-wall and in pharyngeal muscle to affect L1 larval viability, elongation, and pharyngeal and body-wall muscle development, and also affects locomotion and growth; expressed in the body-wall muscles, pharyngeal muscles, and vulval muscles.	33.3	Y	Y		ENSG00000111245	MYL2	EF-hand domain
WBGene00007458	C08F11.11	none available	33.21				n/a	n/a	n/a
WBGene00000788	cpz-1	cpz-1 encodes a homolog of cathepsin z-like cysteine protease cyclically expressed in hypodermal cells throughout development (along with adult gonad and pharynx) and required for normal molting; CPZ-1 protein is present in cuticle regions shortly before their degradation during ecydsis, and this expression pattern is conserved in Onchocerca volvulus; cpz-1(ok497) and cpz-1(RNAi) worms have defec…	33.2	Y			ENSG00000101160	CTSZ	Peptidase C1A, papain C-terminal
WBGene00001239	elo-1	elo-1 encodes a component of C-18 polyunsaturated fatty acid (PUFA) elongase that is required for normal elongation of n-6 and n-3 20-carbon PUFA in vivo; ELO-1 is a condensing enzyme that elongates n-6 and n-7 (and, with less efficiency, n-3) series C18 PUFAs.	33.05	Y			ENSG00000170522	ELOVL6	ELO family
WBGene00001394	fat-2	fat-2 encodes a delta-12 fatty acyl desaturase that increases membrane fluidity when expressed in yeast, and that may protect against cold stress; FAT-2"s substrate is unknown, but may be acyl-CoA; FAT-2 is required in vivo for normal levels of C18 or C20 polyunsaturated fatty acids (PUFAs); FAT-2 is fully required for a sperm-attracting cue (perhaps an eicosanoid) secreted by oocytes, and partia…	32.92	Y	Y		n/a	n/a	n/a
WBGene00022089	Y69A2AR.18	none available	32.85	Y			ENSG00000165629	ATP5C1	ATPase, F1 complex, gamma subunit
WBGene00000064	act-2	act-2 encodes one of five C. elegans actins; act-2 functions redundantly in early embryonic cortical microfilaments with act-1 and act-3, and dominant mutations in act-2 result in uncoordinated locomotion; an ACT-2::GFP reporter fusion is expressed in the cytoplasm of embryonic cells and is also found in contractile filaments in adult muscle cells.	32.76	Y		Y	ENSG00000233917	POTEB	Actin family
WBGene00002247	lam-1	lam-1 encodes a laminin beta that affects degenerin-induced cell death and is required redundantly with lam-2 for morphogenesis.	32.48	Y			ENSG00000091128	LAMB4	EGF-like domain
WBGene00000752	col-179	none available	32.22				ENSG00000019169	MARCO	Nematode cuticle collagen, N-terminal
WBGene00011869	dod-6	none available	32.2	Y			n/a	n/a	n/a
WBGene00000597	col-8	col-8 encodes a collagen, individually dispensable for viability and gross morphology, which is specifically expressed in dauers and adults but not in eggs or L4 larvae, like col-7, col-18, and col-19; the amino- and carboxyl-terminal cysteine-rich regions of COL-8 are most closely related to those of COL-19, COL-35, and COL-39.	32.16				ENSG00000133661	SFTPD	Nematode cuticle collagen, N-terminal
WBGene00019017	F57F4.4	none available	32.16	Y			ENSG00000074181	NOTCH3	ET repeat
WBGene00010605	K06G5.1	none available	31.93				n/a	n/a	n/a
WBGene00003153	mca-3	mca-3 encodes one of three C. elegans plasma membrane Ca2+ ATPases (PMCAs); by homology, MCA-3 is predicted to function as a molecular pump that couples ATP hydrolysis to extrusion of cytosolic Ca2+; mca-3 activity is required for coelomoycte endocytosis, normal coordinated locomotion, and embryonic and larval development; in regulating endocytosis, MCA-3 is required specifically in the early sta…	31.92	Y			ENSG00000157087	ATP2B2	P-type ATPase
WBGene00000215	asp-2	asp-2 encodes aspartic protease.	31.84	Y		Y	ENSG00000256713	PGA5	Aspartic peptidase A1 family
WBGene00002264	lec-1	lec-1 encodes a tandem repeat-type galectin in which each galectin domain is homologous to typical vertebrate 14-kDa-type galectins; the two sugar binding sites have distinct sugar binding properties in vitro and lec-1 is expressed most abundantly in the adult cuticle.	31.84	Y	Y		ENSG00000275572	GRIFIN	Galectin, carbohydrate recognition domain
WBGene00016148	C26F1.3	none available	31.78	Y			n/a	n/a	n/a
WBGene00019955	R08C7.12	none available	31.66				n/a	n/a	n/a
WBGene00000276	byn-1	byn-1 encodes a homolog of mammalian BYSTIN-LIKE (BYSL; OMIM:603871).	31.43	Y			ENSG00000112578	BYSL	Bystin
WBGene00002083	inf-1	inf-1 encodes a protein with high similarity to eukaryotic initiation factor 4A.	31.43	Y			ENSG00000161960	EIF4A1	Helicase, C-terminal
WBGene00002258	lbp-6	none available	31.38				ENSG00000166426	CRABP1	Cytosolic fatty-acid binding
WBGene00000371	cco-1	cco-1 encodes the ortholog of the nuclear-encoded cytochrome c oxidase-1 subunit Vb/COX4, a component of the electron transport chain in mitochondria; knock-down of cco-1 via RNA interference in specific tissues like body wall muscle decreases life span, whereas knock-down in the nervous system and intestine increases life-span; the effects of cco-1 on life span indicate that the electron transpo…	31.09				ENSG00000135940	COX5B	Cytochrome c oxidase, subunit Vb
WBGene00022072	cpg-9	cpg-9 encodes a small (69-residue), putatively secreted protein with 4 potential chondroitin attachment sites, 2 of them verified by mass spectrometry; CPG-9 has no obvious function in mass RNAi assays.	31.09				n/a	n/a	n/a
WBGene00013016	tbc-15	none available	31.09				ENSG00000068354	TBC1D25	n/a
WBGene00022042	icd-2	none available	30.93	Y			ENSG00000121089	n/a	Nascent polypeptide-associated complex NAC domain
WBGene00000114	alh-8	alh-8 is orthologous to the human gene METHYLMALONATE-SEMIALDEHYDE DEHYDROGENASE (ALDH6A1; OMIM:603178), which when mutated leads to MMSDH deficiency.	30.91	Y	Y		ENSG00000119711	ALDH6A1	Methylmalonate-semialdehyde dehydrogenase
WBGene00009982	F53F1.4	none available	30.86	Y			n/a	n/a	n/a
WBGene00000217	asp-4	asp-4 encodes an aspartyl protease homolog that is required, in parallel with ASP-3 but downstream of CLP-1 and TRA-3, for degenerative (necrotic-like) cell death in neurons induced by mutations such as mec-4(d), deg-3(d), or gsa-1(gf).	30.85	Y	Y		ENSG00000131401	n/a	Aspartic peptidase A1 family
WBGene00008799	F14E5.1	none available	30.84	Y			ENSG00000251357	n/a	Major facilitator, sugar transporter-like
WBGene00195147	F14E5.8	none available	30.84	Y			n/a	n/a	n/a
WBGene00009050	F22D6.2	none available	30.75	Y			ENSG00000086666	ZFAND6	Zinc finger, AN1-type
WBGene00002198	kin-14	kin-14 encodes a member of the tyrosine-specific subfamily of kinases that contains an SH2 domain, and has with similarity to the human proto-oncogene tyrosine-protein kinase FER.	30.75				ENSG00000182511	FES	SH2 domain
WBGene00000700	col-126	none available	30.74				ENSG00000133661	SFTPD	Nematode cuticle collagen, N-terminal
WBGene00017591	F19C7.1	none available	30.73				n/a	n/a	n/a
WBGene00004300	ram-2	ram-2 encodes a cuticle collagen that interacts with unc-6 to affect ray cell migration, and interacts with unc-5 and unc-6 to affect embryonic viability; also affects ray morphology in males such that the structural cells and the hypodermis of the rays are swollen in mutants.	30.54	Y			ENSG00000019169	MARCO	Nematode cuticle collagen, N-terminal
WBGene00000701	col-127	none available	30.35				ENSG00000133661	SFTPD	Nematode cuticle collagen, N-terminal
WBGene00003375	mlp-1	mlp-1 encodes a LIM domain-containing protein that is a member of the MLP/CRP family of muscle LIM domain proteins.	30.34	Y	Y		ENSG00000182809	CRIP2	Zinc finger, LIM-type
WBGene00001155	ech-6	none available	30.06			Y	ENSG00000127884	ECHS1	Crotonase superfamily
WBGene00011500	T05G5.5	none available	30.06				ENSG00000172992	DCAKD	Dephospho-CoA kinase
WBGene00000714	col-141	none available	29.99				ENSG00000133661	SFTPD	Nematode cuticle collagen, N-terminal
WBGene00019946	chat-1	none available	29.67	Y			ENSG00000182107	TMEM30B	CDC50/LEM3 family
WBGene00011272	dtmk-1	none available	29.62			Y	ENSG00000168393	DTYMK	Thymidylate kinase
WBGene00002110	ins-27	ins-27 encodes an insulin-like peptide.	29.55	Y			n/a	n/a	n/a
WBGene00003962	pdi-1	pdi-1 encodes a protein disulfide isomerase; loss of function mutations in pdi-1 result in no obvious abnormalities, but animals triply mutant for three C. elegans PDI"s, encoded by pdi-1, pdi-2, and pdi-3, display embryonic lethality characterized by loss of vermiform morphology after elongation, suggesting that the pdi genes function redundantly in embryonic morphogenesis; PDI-1 exhibits protei…	29.52	Y		Y	ENSG00000185624	P4HB	Disulphide isomerase
WBGene00014148	ZK909.3	none available	29.49				ENSG00000184508	HDDC3	HD/PDEase domain
WBGene00011232	pck-2	R11A5.4 is one of three C. elegans genes that encode proteins with similarity to phosphoenolpyruvate carboxykinase (PEPCK); by similarity, the products of R11A5.4 are predicted to function in gluconeogenesis.	29.48	Y	Y		ENSG00000124253	PCK1	Phosphoenolpyruvate carboxykinase, GTP-utilising
WBGene00000681	col-107	none available	29.4				ENSG00000133661	SFTPD	Nematode cuticle collagen, N-terminal
WBGene00001244	elo-6	The elo-6 gene encodes a paralog of elo-1 and elo-2, each of which encodes a polyunsaturated fatty acid (PUFA) elongase; ELO-6 may be required for a normally high growth rate.	29.39	Y			n/a	n/a	n/a
WBGene00016534	C39D10.7	C39D10.7 encodes a large (1185-residue) protein with 11 chitin-binding peritrophin-A domains; C39D10.7 transcripts are enriched in hermaphrodites; like CEJ-1 and CPG-2, C39D10.7 might participate in eggshell synthesis and early embryonic development, and C39D10.7"s multiple peritrophin-A domains might enable mechanical cross-linking of chitin; however, C39D10.7 alone has no visible function in ma…	29.38				n/a	n/a	n/a
WBGene00002269	lec-6	lec-6 encodes a "proto" type galectin (beta-galactosyl-binding lectin) containing a single carbohydrate recognition domain; by homology, LEC-6 may play roles in cell adhesion and aggregation, proliferation, or programmed cell death, but as loss of lec-6 activity via large-scale RNAi screens does not result in obvious abnormalities, the precise role of LEC-6 in C. elegans development and/or behavi…	29.33	Y			ENSG00000283082	LGALS7	Galectin, carbohydrate recognition domain
WBGene00001073	dpy-11	dpy-11 encodes a membrane- associated thioredoxin- like (TRX) protein that affects body shape and ray morphology; the TRX domain displays catalytic activity in vitro, and dpy-11 is expressed in cytoplasm of hypodermis.	29.27	Y			ENSG00000125827	TMX4	Thioredoxin-like fold
WBGene00000653	col-77	col-77 encodes a cuticular collagen; as loss of col-77 activity via RNAi screens results in no obvious defects, the precise role of col-77 in C. elegans development and/or behavior is not yet known.	29.21	Y			ENSG00000019169	MARCO	Nematode cuticle collagen, N-terminal
WBGene00005002	spp-17	none available	29.21				n/a	n/a	n/a
WBGene00009454	F36A2.7	none available	29.16		Y	Y	n/a	n/a	n/a
WBGene00000712	col-139	none available	29.15				n/a	n/a	n/a
WBGene00009578	F40F8.5	none available	29.02	Y			ENSG00000130528	HRC	n/a
WBGene00020836	lgc-34	none available	29.02				n/a	n/a	n/a
WBGene00010174	F56H9.2	none available	29.01	Y			n/a	n/a	n/a
WBGene00006537	tbb-2	tbb-2 encodes a homolog of mammalian beta-tubulin (TUBB) that is expressed at high levels in the germline; TBB-2 is redundant for embryonic viability, due to its paralog TBB-1; however, unlike its paralog TBB-1 it is preferred for normal microtubule severing by the katanin complex MEI-1/MEI-2; TBB-2 is required together with TBB-1, TBA-1, and tba-2 to make spindle structures in embryos and TBB-2 …	29	Y			ENSG00000173876	n/a	Tubulin
WBGene00000928	dao-2	dao-2 encodes a (putatively) secreted protein with a DB module; dao-2 is down-regulated in daf-2 mutant adults by comparison with normal adults, and thus may be involved in dauer formation.	28.99	Y			n/a	n/a	n/a
WBGene00001390	far-6	none available	28.95	Y	Y		n/a	n/a	n/a
WBGene00013308	nuo-3	The nuo-3 locus encodes two distinct, non-overlapping proteins: Y57G11C.12a (homologous to human C3orf10/BRICK1, a component of the WAVE1 complex) and Y57G11C.12b (a putative NADH-ubiquinone oxidoreductase alpha subunit, homologous to human NDUFA6 [OMIM:602138]).	28.92	Y			ENSG00000254999	BRK1	NADH dehydrogenase [ubiquinone] (complex I), alpha subcomplex, subunit 6
WBGene00003786	npa-1	npa-1 encodes a large polyprotein precursor that is posttranslationally cleaved to multiple units of ~14.5kDa, each of which is a strong binding protein for fatty acids and retinol (Vitamin A); the lipid binding sites of NPA-1-derived peptides are unusually apolar; NPA-1-derived peptides probably are carrier proteins that enable distribution of these lipids within nematodes; NPA-1-derived peptide…	28.87				n/a	n/a	n/a
WBGene00019760	calu-1	none available	28.4				ENSG00000142552	RCN3	EF-hand domain
WBGene00008142	C47E8.3	none available	28.31			Y	n/a	n/a	n/a
WBGene00001581	gfi-1	gfi-1 encodes a protein that contains 21 ET modules; interacts with unc-68 in yeast two-hybrid assays.	28.23	Y		Y	ENSG00000074181	NOTCH3	ET repeat
WBGene00044180	C47E8.11	none available	28.21			Y	n/a	n/a	n/a
WBGene00011884	enol-1	enol-1 is orthologous to human ENOLASE 1 (also CRYSTALLIN, TAU; ENO1; OMIM:172430), which when mutated leads to spherocytic red cell enolase deficiency.	27.98	Y			ENSG00000111674	ENO2	Enolase
WBGene00011498	T05G5.1	none available	27.52	Y	Y		n/a	n/a	n/a
WBGene00001427	fkb-2	fkb-2 encodes a peptidylprolyl cis/trans isomerase homologous to the mammalian FK506 immunosuppressant-binding protein 1A (FKBP1A, OMIM:186945, mutations associated with myocardial noncompaction); by homology, FKB-2 could function in a number of processes including protein folding, signal transduction, and regulation of muscle contraction; however, the precise role of FKB-2 in C. elegans developm…	27.4	Y		Y	ENSG00000105701	FKBP8	FKBP-type peptidyl-prolyl cis-trans isomerase domain
WBGene00001113	dur-1	The dur-1 ("Dauer UpRegulated") gene encodes proteins (DUR-1A and DUR-1C) that are predicted to be hydrophilic and heat-resistant, and that might participate in anhydrobiosis; expression of at least one dur-1 transcript is upregulated in dauer larvae and other transcripts may be specifically expressed in dauer larvae.	27.39	Y	Y		ENSG00000189001	SBSN	n/a
WBGene00006784	unc-49	unc-49 encodes multiple subunits of a heteromeric GABA receptor; unc-49 activity is required for postsynaptic GABA responsiveness and thus for normal regulation of locomotion; UNC-49::GFP reporter fusions for at least two isoforms are expressed in dorsal and ventral head and body wall muscles, with isoform-specific expression also seen in the sphincter muscle; UNC-49::GFP subcellular localization…	27.29	Y	Y		ENSG00000188828	GLRA4	Gamma-aminobutyric-acid A receptor, beta subunit
WBGene00009983	cut-2	cut-2 encodes a secreted protein which is a component of cuticlin, the insoluble residue of nematode cuticles; CUT-2 is expressed during all developmental stages and contributes to the external cortical layer of the cuticle of all larval stages.	27.28				n/a	n/a	n/a
WBGene00000715	col-142	none available	27.27				ENSG00000133661	SFTPD	Nematode cuticle collagen, N-terminal
WBGene00012472	Y17G7B.21	none available	27.15	Y			n/a	n/a	n/a
WBGene00001694	grd-5	grd-5 encodes a hedgehog-like protein, with an N-terminal signal sequence and a C-terminal Ground domain; GRD-5 is expressed in adult anterior and posterior seam cells, overlapping GRD-3 expression; the Ground domain is predicted to form a cysteine-crosslinked protein involved in intercellular signalling, and it has subtle similarity to the N-terminal Hedge domain of HEDGEHOG proteins; GRD-5 is w…	27.04	Y			n/a	n/a	n/a
WBGene00000534	cpi-2	cpi-2 encodes a protein that contains a cystatin-like domain.	27.01	Y		Y	ENSG00000175315	CST6	Cystatin domain
WBGene00020869	T28A11.2	none available	26.98	Y			n/a	n/a	n/a
WBGene00020216	trap-2	none available	26.97				ENSG00000163479	SSR2	Translocon-associated protein subunit beta
WBGene00021768	Y51F10.7	none available	26.91				n/a	n/a	n/a
WBGene00194920	H12I19.115	none available	26.71				n/a	n/a	n/a
WBGene00003090	lys-1	lys-1 encodes a putative lysozyme, whose overexpression increases resistance to infection by Serratia marcescens; lys-1(RNAi) animals have normal resistance to S. marcescens, perhaps because of genetic redundancy with the LYS-1 paralogs LYS-2 to -8 and LYS-10; in uninfected animals, LYS-1 is expressed in the intestine and in IL1/IL2 neurons, along with a few unidentified head neurons; in intestin…	26.69	Y			n/a	n/a	n/a
WBGene00012668	Y39B6A.5	none available	26.6			Y	n/a	n/a	n/a
WBGene00010539	ttr-2	K03H1.4 encodes a protein containing a predicted signal sequence followed by a transthyretin-like domain; the product of K03H1.4 belongs to a family of apparently nematode-specific proteins whose function is not yet known.	26.58				n/a	n/a	n/a
WBGene00019713	pqn-52	pqn-52 encodes, by alternative splicing, three proteins with glutamine/asparagine (Q/N)-rich ("prion") domains; at least one of these isoforms bound KLC-2 in a mass yeast two-hybrid screen; PQN-52 proteins are predicted to be secreted, and have no obvious homologs outside of the nematodes (e.g., Brugia malayi 14952.m01392).	26.39	Y		Y	n/a	n/a	n/a
WBGene00001398	fat-6	fat-6 encodes an Acyl-CoA desaturase (also known as delta-9 fatty acid desaturase); when expressed heterologously in S. cerevisiae, FAT-6 rescues the fatty acid auxotrophy of the ole1 delta-9 desaturase mutant; FAT-6 readily desaturates stearic acid (18:0), or similar fatty acids (17:0 or 18:1 delta-11 trans), but shows less activity on palmitic acid (16:0), and no activity on other medium chain …	26.37	Y			ENSG00000145284	SCD5	Fatty acid desaturase domain
WBGene00018148	F37C4.8	none available	26.24				n/a	n/a	n/a
WBGene00044438	Y51F10.11	none available	26.14	Y			n/a	n/a	n/a
WBGene00020808	clik-1	none available	26.11	Y		Y	n/a	n/a	n/a
WBGene00004700	rsp-3	rsp-3 encodes an ortholog of human SF2/ASF and member of the SR protein family of nuclear phosphoproteins that are required for constitutive splicing and influence alternative splicing regulation; rsp-3 affects the development of oocytes together with rsr-1, and is required for late embryonic viability; SPK-1 binds directly to and phosphorylates the RS domain of RSP-3 in vitro; the rsp-3 mRNA is …	26.05	Y			ENSG00000111786	SRSF9	RNA recognition motif domain
WBGene00011059	R06C1.4	none available	25.89	Y	Y		ENSG00000197038	n/a	RNA recognition motif domain
WBGene00001444	flp-1	flp-1 can encode up to seven distinct, yet highly similar, FMRFamide-related peptides (FaRPs), small neuromodulatory peptides that are characterized by a C-terminal Arg-Phe-amide motif; in C. elegans, FLP-1 peptides are required for regulation of several behaviors, including well-coordinated, sinusoidal movement and the transition between active and inactive states of egg-laying; receptors for th…	25.88	Y			n/a	n/a	n/a
WBGene00001502	ftt-2	ftt-2 encodes a 14-3-3 protein; FTT-2 is required for regulating the localization of the product of YAP-1, a Yes-associated protein (Yap) homolog, between the cytoplasm and the nucleus.	25.88	Y	Y		ENSG00000108953	YWHAE	14-3-3 protein
WBGene00011856	T20D3.2	none available	25.83				n/a	n/a	n/a
WBGene00004398	rol-8	rol-8 encodes a collagen that is enriched in dauer larvae; mutations cause adults to become left-handed rollers.	25.81	Y			ENSG00000019169	MARCO	Nematode cuticle collagen, N-terminal
WBGene00001005	dlc-1	dlc-1 encodes a dynein light chain 1, required for viability, that inhibits DHC-1 in vivo; DLC-1 is 92-95% identical to its orthologs human DYNLL1 (OMIM:601562) and DYNLL2 (OMIM:608942); DLC-1 is paralogous to DLC-2/-6; DLC-1 is expressed in adult body wall muscle, and in larval and adult pharynx, posterior intestine, and nervous system (e.g., ventral nerve cord, head neurons, and tail neurons); …	25.77	Y	Y	Y	ENSG00000088986	DYNLL1	Dynein light chain, type 1/2
WBGene00019947	htz-1	htz-1 encodes the C. elegans ortholog of the H2A.Z histone variant; htz-1 is an essential gene and during development, HTZ-1 functions with the PHA-4/FoxA transcription factor and the MYS-1/TIP60-SSL-1/SWR1 remodeling complex to regulate gene expression during pharyngeal (foregut) organogenesis; a YFP::HTZ-1 fusion protein localizes to pharyngeal gene promoters at the onset of transcription, in a…	25.69	Y			ENSG00000164032	H2AFZ	Histone H2A
WBGene00003515	myo-3	myo-3 encodes MHC A, the minor isoform of MHC (myosin heavy chain) that is essential for thick filament formation, and for viability, movement, and embryonic elongation; expressed in body muscle, the somatic sheath cell covering the hermaphrodite gonad, and also expressed in enteric muscle, vulval muscles of the hermaphrodite and the diagonal muscles of the male tail.	25.67	Y	Y		ENSG00000133392	MYH11	Myosin head, motor domain
WBGene00000473	cey-2	cey-2 encodes a cold-shock/Y-box domain-containing protein; by homology, CEY-2 is predicted to function as either an RNA-binding protein involved in translation or RNA processing, or a DNA-binding protein involved in transcriptional regulation; cey-2 mRNA is expressed maternally in the early embryo, in a pattern characteristic of class II maternal RNAs, which are initially detected throughout the…	25.58	Y		Y	ENSG00000065978	YBX1	Cold-shock protein, DNA-binding
WBGene00044609	tbcc-1	none available	25.57				ENSG00000124659	TBCC	Tubulin binding cofactor C-like domain
WBGene00020679	ogdh-1	The T22B11.5 gene encodes an ortholog of the human gene OGDH, which when mutated leads to alpha-ketoglutarate deficiency (OMIM:203740); the T22B11.5 protein is predicted to be mitochondrial with 68% accuracy.	25.47	Y			ENSG00000181192	DHTKD1	Dehydrogenase, E1 component
WBGene00006660	twk-5	twk-5 encodes one of 44 C. elegans TWK (two-P domain K+) potassium channel subunits that contain two pore-forming domains and four transmembrane domains; as loss of TWK-5 function via RNA-mediated interference (RNAi) does not result in any abnormalities, the precise role of TWK-5 in C. elegans development and/or behavior is not yet known; TWK-5 may, however, function redundantly with other TWK ch…	25.43				n/a	n/a	n/a
WBGene00000727	col-154	none available	25.42				ENSG00000019169	MARCO	Nematode cuticle collagen, N-terminal
WBGene00000603	col-14	col-14 encodes a collagen protein that affects vulval morphology in a large-scale RNAi screen; mRNA expressed in embryos and transcript levels peak during each larval stage.	25.36	Y			ENSG00000019169	MARCO	Nematode cuticle collagen, N-terminal
WBGene00017688	ttr-35	none available	25.05				n/a	n/a	n/a
WBGene00044605	ttr-36	none available	25.05	Y			n/a	n/a	n/a
WBGene00022642	lipl-5	lipl-5 encodes a lipase; lipl-5 is expressed in the intestine and its expression is negatively regulated in well-fed animals by MXL-3; lipl-5 expression is induced upon bacterial infection.	25.04				ENSG00000204022	LIPJ	Alpha/beta hydrolase fold-1
WBGene00010049	F54D5.3	none available	25.02	Y			n/a	n/a	n/a
WBGene00003511	mxl-3	mxl-3 encodes a basic helix-loop-helix transcription factor; an mxl-3 deletion mutation, tm2580, has been reported to exhibit a slight growth delay; in vitro, MXL-3 binds E-box and/or E-box-like sequences; an mxl-3 reporter fusion is expressed in larvae and adults and seen in head muscles and neurons, part of the intestine, and body hypodermis.	24.95	Y	Y		ENSG00000125952	MAX	Myc-type, basic helix-loop-helix (bHLH) domain
WBGene00009514	F37H8.5	none available	24.94		Y		ENSG00000216490	IFI30	Peptide methionine sulphoxide reductase MrsB
WBGene00004357	rho-1	rho-1 encodes a Rho GTPase; rho-1 activity is required for regulation of a number of actin filament-based processes including embryonic polarity, cell migration, cell shape changes, muscle contraction, and neurite outgrowth; in addition, RHO-1 is required for both DGK-1- and UNC-13-dependent and independent regulation of synaptic signaling at neuromuscular junctions; as RHO-1 binds DGK-1 in vitro…	24.93	Y			ENSG00000271810	n/a	Small GTPase superfamily
WBGene00014016	ZK632.9	none available	24.93	Y			n/a	n/a	n/a
WBGene00017166	aldo-2	aldo-2 encodes a fructose-bisphosphate aldolase homologous to human ALDOB, which when mutated leads to fructosemia, hereditary fructose intolerance (OMIM:229600).	24.85	Y			ENSG00000136872	ALDOB	Fructose-bisphosphate aldolase, class-I
WBGene00015168	pdi-6	none available	24.85	Y			ENSG00000143870	PDIA6	Disulphide isomerase
WBGene00002253	lbp-1	lbp-1 encodes a predicted secreted fatty acid binding protein (FABP) that is similar to the Ascaris suum secreted FABP As-p18; by homology, LBP-1 is predicted to function in sequestering or transporting small hydrophobic molecules such as lipids and steroid hormones; an lbp-1::gfp promoter fusion is expressed in the embryo, beginning at gastrulation, in presumptive hypodermal precursors; lbp-1::g…	24.8				n/a	n/a	n/a
WBGene00010631	cash-1	cash-1 encodes an ortholog of Drosophila CKA and the human striatins STRN, STRN3, and STRN4 that is required for vulval development; CASH-1 has an N-terminal region which may bind caveolin or calmodulin, and a C-terminal region with five tandem WD domains; by its orthology with CKA and striatins, CASH-1 is predicted to act as a scaffold linking signal transduction proteins (such as JKK-1 and JNK-…	24.69				ENSG00000115808	STRN	WD40 repeat
WBGene00013569	bath-36	none available	24.64	Y		Y	n/a	n/a	n/a
WBGene00000879	cyn-3	cyn-3 encodes an abundantly expressed cyclophilin A isoform with peptidyl-prolyl isomerase activity in vitro, which closely resembles the prototypical CypA and is thus likely to be a member of the cytosolic CsA-binding cyclophilin subfamily; cyn-3 is exclusively expressed in the single anterior excretory cell, and is dispensable for viability and gross morphology in mass RNAi screens.	24.64	Y			ENSG00000263464	PPIAL4C	Cyclophilin-type peptidyl-prolyl cis-trans isomerase domain
WBGene00022245	acp-6	none available	24.62				n/a	n/a	n/a
WBGene00006794	unc-60	unc-60 encodes two, tissue-specific isoforms of actin depolymerizing factor(ADF)/cofilin, actin-binding proteins that regulate actin filament dynamics; one UNC-60 isoform, UNC-60A, primarily binds G-actin, depolymerizes actin filaments, and inhibits actin polymerization; UNC-60A is essential during early embryonic development for polar body extrusion, cytokinesis, and embryonic patterning; UNC-60…	24.62	Y	Y		ENSG00000125868	DSTN	Actin-depolymerising factor homology domain
WBGene00017981	figl-1	figl-1 encodes an homolog of human SPASTIN (OMIM:604277, mutated in spastic paraplegia), FIDGETIN (OMIM:605295, mutated in fidget mice), and FIDGETIN-LIKE-1, and of Drosophila SPASTIN; recombinant FIGL-1 protein has N-ethylmaleimide-sensitive ATPase activity in vitro, which is strongly dependent on the C368 residue immediately C-terminal to its Walker A motif; figl-1 is required for persistence o…	24.54				ENSG00000278685	IQCA1L	AAA+ ATPase domain
WBGene00017982	hpo-18	none available	24.54			Y	ENSG00000180389	ATP5EP2	ATPase, F1 complex, epsilon subunit, mitochondrial
WBGene00001303	emo-1	emo-1 encodes an ortholog of S. cerevisiae Sec61p gamma subunit, which is required for translocation of secreted and membrane proteins into the endoplasmic reticulum; EMO-1 is required for oogenesis and ovulation.	24.53	Y			ENSG00000132432	SEC61G	Protein translocase complex, SecE/Sec61-gamma subunit
WBGene00006945	wars-1	wrs-1 encodes a predicted tryptophanyl-tRNA synthetase that affects fertility, embryonic viability, growth, and locomotion	24.47				ENSG00000140105	WARS	Aminoacyl-tRNA synthetase, class Ic
WBGene00000728	col-155	none available	24.26				ENSG00000019169	MARCO	Nematode cuticle collagen, N-terminal
WBGene00000657	col-81	none available	24.11			Y	ENSG00000019169	MARCO	Nematode cuticle collagen, N-terminal
WBGene00000479	cgh-1	cgh-1 encodes a putative DEAD-box RNA helicase, orthologous to budding yeast Dhh1p, fission yeast Ste13p, Drosophila ME31B, and human DDX6 (OMIM:600326); CGH-1 inhibits physiological apoptosis in oocytes, keeping it down to a normal level of ~50% in hermaphrodite gonads; independently of apoptosis, CGH-1 is also required for sperm function, oocyte fertilization, and early embryonic cytokinesis; b…	24	Y			ENSG00000110367	DDX6	Helicase, C-terminal
WBGene00044065	tag-229	none available	23.99				n/a	n/a	n/a
WBGene00012370	W09G3.7	none available	23.99				ENSG00000274523	RCC1L	Regulator of chromosome condensation, RCC1
WBGene00012544	Y37D8A.2	none available	23.99		Y		ENSG00000121316	PLBD1	Phospholipase B-like
WBGene00006915	vha-6	vha-6 encodes an ortholog of subunit a of the membrane-bound (V0) domain of vacuolar proton-translocating ATPase (V-ATPase); VHA-6 is orthologous to human ATP6N1A (OMIM:192130), ATP6V0A2, ATP6V0A4 (OMIM:605239, mutated in distal renal tubular acidosis), and TCIRG1 (OMIM:604592, mutated in osteopetrosis); VHA-6 is expressed in germline (P2 through Z3 cells until the comma stage), on the apical sur…	23.93	Y		Y	ENSG00000185344	ATP6V0A2	V-type ATPase, V0 complex, 116kDa subunit family
WBGene00019678	K12H4.3	none available	23.92				ENSG00000113460	BRIX1	Anticodon-binding
WBGene00019679	K12H4.4	none available	23.92			Y	ENSG00000129128	SPCS3	Signal peptidase 22kDa subunit
WBGene00019680	K12H4.5	none available	23.92				n/a	n/a	n/a
WBGene00021335	spp-23	none available	23.9				n/a	n/a	n/a
WBGene00019207	fgt-1	none available	23.89				ENSG00000251357	n/a	Sugar/inositol transporter
WBGene00016981	C56G2.7	none available	23.85	Y			ENSG00000130706	ADRM1	26S proteasome complex ubiquitin receptor, subunit Rpn13
WBGene00002891	let-767	let-767 encodes a steroid dehydrogenase required for embryogenesis, molting, and female reproduction; LET-767 is orthologous to human HSD17B3 (OMIM:605573, mutated in pseudohermaphroditism), HSD17B12 (OMIM:609574), and HSDL1; in vitro, LET-767 catalytically converts androstenedione and estrone into testosterone and estradiol, and in vivo probably catalyzes the synthesis of endogeneous steroid hor…	23.85	Y			ENSG00000130948	HSD17B3	Short-chain dehydrogenase/reductase SDR
WBGene00009141	ncbp-2	ncbp-2 encodes the C. elegans ortholog of the CBP20 subunit of the nuclear cap binding complex; by homology, NCBP-2 is predicted to play a role in mRNA decay; loss of ncbp-2 activity via RNAi indicates that this gene is essential for embryonic and larval development and in addition, plays a role in reproduction and vulval morphogenesis; staining of C. elegans embryos with an antibody to human CBP…	23.85	Y			ENSG00000170935	NCBP2L	RNA recognition motif domain
WBGene00019895	aagr-2	none available	23.82	Y			ENSG00000278563	MGAM2	Glycoside hydrolase family 31
WBGene00185086	F59A3.12	none available	23.71			Y	n/a	n/a	n/a
WBGene00006727	ubq-1	none available	23.65	Y			ENSG00000213886	UBD	Ubiquitin domain
WBGene00013025	vha-13	vha-13 encodes an ortholog of subunit A of the cytoplasmic (V1) domain of vacuolar proton-translocating ATPase (V-ATPase); VHA-13 is predicted to hydrolyse ATP as part of a cytosolic VHA-12/VHA-13 heterohexamer, whose activity drives the V-ATPase rotor; VHA-13 levels are lowered in mutants with either abnormally low or abnormally high calcineurin levels, and elevated in mutants lacking both calci…	23.6	Y			ENSG00000114573	ATP6V1A	ATPase, F1/V1/A1 complex, alpha/beta subunit, nucleotide-binding domain
WBGene00013026	Y49A3A.3	Y49A3A.3 encodes a conserved but uncharacterized protein with some similarity to Barwin-related endoglucanase; Y49A3A.3 shares an operon with vha-13, and thus might be a previously undescribed V-ATPase component or ancillary protein.	23.6	Y			ENSG00000122435	TRMT13	Methyltransferase TRM13
WBGene00010244	F58D5.5	none available	23.55	Y			n/a	n/a	n/a
WBGene00006764	unc-27	unc-27 encodes a troponin I isoform; unc-27 is required for coordinated motility and normal muscle morphology; structural analyses indicate that unc-27 is required for proper sarcomeric organization; unc-27/troponin I interacts with the body wall and pharynx types of troponin C; expression studies show that unc-27 is expressed in body wall, vulval and anal muscles.	23.54	Y	Y		ENSG00000159173	TNNI1	Troponin
WBGene00003929	pat-2	pat-2 encodes an alpha integrin subunit; during embryogenesis, pat-2 is essential for body wall muscle assembly and function and hence, proper elongation and hatching.	23.53	Y			ENSG00000005961	ITGA2B	Integrin alpha chain
WBGene00021420	trap-3	none available	23.4				ENSG00000114850	SSR3	Translocon-associated protein subunit gamma
WBGene00013434	Y66D12A.8	none available	23.38				ENSG00000018610	CXorf56	UPF0428 family
WBGene00018237	drd-2	none available	23.35	Y			n/a	n/a	n/a
WBGene00001243	elo-5	The elo-5 gene encodes a paralog of elo-1 and elo-2, each of which encodes a polyunsaturated fatty acid (PUFA) elongase; ELO-5 is required for normally rapid growth and for normal fatty acid composition.	23.24	Y		Y	n/a	n/a	n/a
WBGene00003915	pan-1	pan-1 encodes a novel predicted transmembrane protein with extracellular leucine-rich repeats; loss of PAN-1 activity via RNAi results in molting defects and arrested L2-sized larvae, indicating that PAN-1 is required for completion of the larval molts; pan-1 expression is enriched in the germline and upregulated in animals mutant for unc-95, which encodes a LIM domain-containing protein that loc…	23.2	Y			ENSG00000185985	SLITRK2	Leucine-rich repeat
WBGene00021952	vha-19	vha-19 encodes an ortholog of subunit Ac45 of the membrane-bound (V0) domain of vacuolar proton-translocating ATPase (V-ATPase); VHA-19 is a predicted V-ATPase transmembrane rotor component; Ac45 is a nonhomologous replacement for subunit c", which is found in fungi but not in animals; conversely, orthologs of Ac45 are only found in animals; VHA-19 is predicted to help carry protons from the cyto…	23.15	Y			n/a	n/a	n/a
WBGene00000833	cts-1	cts-1 encodes a citrate synthase; by homology, CTS-1 is predicted to function in the citric acid cycle to catalyze the formation of citrate from oxaloacetate and acetyl-CoA; cts-1 is required for embryonic development.	23.14	Y			ENSG00000062485	CS	Citrate synthase
WBGene00016655	acbp-1	acbp-1 encodes a highly conserved protein containing a functional acyl-CoA-binding binding domain orthologous to human DBI (Diazepam Binding inhibitor) (OMIM: 125950) required for protein stability and ligand binding; acyl-CoA proteins are required for lipid droplet morphology and lipid storage function; acbp-1 mutants have reduced triglycerides, aberrant lipid droplet morphology and number in th…	23.02	Y			ENSG00000176244	ACBD7	Acyl-CoA-binding protein, ACBP
WBGene00012097	abcf-2	none available	22.99	Y			ENSG00000033050	ABCF2	ABC transporter-like
WBGene00012094	T27E9.2	none available	22.99	Y		Y	ENSG00000233954	UQCRHL	Cytochrome b-c1 complex, subunit 6
WBGene00000535	cpi-1	cpi-1 encodes a homolog of cysteine protease inhibitors (cystatins); cpi-1 is at least superficially dispensable for viability and gross morphology.	22.95				ENSG00000175315	CST6	Cystatin domain
WBGene00009097	fipr-2	none available	22.89	Y			n/a	n/a	n/a
WBGene00022235	sqd-1	none available	22.83	Y			ENSG00000277726	n/a	RNA recognition motif domain
WBGene00012148	inos-1	inos-1 encodes the C. elegans myo-inositol-1-phosphate (MIP) synthase ortholog; by homology, the product of inos-1 is predicted to function in de novo inositol biosynthesis by catalyzing the conversion of glucose-6-phosphate to inositol-1-phosphate; loss of inos-1 activity via RNAi has been reported to result in low levels of embryonic lethality, larval lethality, slow growth, uncoordinated locom…	22.81				ENSG00000105655	ISYNA1	Myo-inositol-1-phosphate synthase
WBGene00020696	T22F3.3	T22F3.3 is orthologous to the human glycogen phosphorylase isozymes found in the muscle (PYGM), liver (PYGL) and brain (PYGB); T22F3.3 is down-regulated in efl-1/E2F transcription factor and dpl-1/DP (E2F-heterodimerization partner) mutants and has putative E2F consensus sites.	22.79	Y		Y	ENSG00000100994	PYGB	Glycosyl transferase, family 35
WBGene00000149	apl-1	apl-1 encodes two almost identical isoforms orthologous to human Amyloid precursor protein (APP); although native APL-1 is predicted to be membrane-bound until proteolytically cleaved, neuronal expression of a partial N-terminal extracellular region of APL-1 alone, containing either the E1 or the E2 domain, is sufficient for APL-1"s normal functions in vivo (molting and morphogenesis, pharyngeal …	22.76	Y			ENSG00000105290	APLP1	Amyloidogenic glycoprotein, extracellular
WBGene00021427	Y38F2AR.9	none available	22.73	Y			ENSG00000106803	SEC61B	Protein transport protein SecG/Sec61-beta/Sbh
WBGene00011487	T05E12.6	none available	22.72				n/a	n/a	n/a
WBGene00003920	par-5	PAR-5 encodes one of two C. elegans 14-3-3 proteins; par-5 is essential for early embryonic development, particularly for early embryonic asymmetry; PAR-5 also functions in a Wnt/MAPK signaling pathway to regulate the nuclear level of the POP-1/TCF transcription factor; PAR-5 has been shown to physically interact with a number of proteins, including those involved in G protein signaling pathways …	22.67	Y			ENSG00000175793	SFN	14-3-3 protein
WBGene00011880	T21B6.3	The protein product of this gene is predicted to contain a glutamine/asparagine (Q/N)-rich ("prion") domain, by the algorithm of Michelitsch and Weissman (as of the WS77 release of WormBase, i.e., in wormpep77).	22.63	Y	Y		ENSG00000126759	CFP	Thrombospondin type-1 (TSP1) repeat
WBGene00011392	sbt-1	sbt-1 encodes the C. elegans ortholog of the neuroendocrine chaperone 7B2; by homology, SBT-1 is predicted to function in the maturation/activation of the EGL-3/PC2 proprotein convertase; accordingly, mass spectrometry analysis indicates that sbt-1 activity is required for production of some neuropeptides; sbt-1 mutant animals are also aldicarb resistant, suggesting that SBT-1 is required for nor…	22.61	Y			ENSG00000281931	SCG5	Neuroendocrine 7B2 precursor
WBGene00022748	oaz-1	none available	22.6	Y			ENSG00000180304	OAZ2	Ornithine decarboxylase antizyme
WBGene00009787	F46F2.3	none available	22.54				n/a	n/a	n/a
WBGene00007009	wwp-1	wwp-1 encodes, by alternative splicing, two isoforms of a putative E3 ubiquitin ligase orthologous to budding yeast Rsp5, Drosophila SU(DX), and human WWP1 (OMIM:602307) and WWP2 (OMIM:602308); WWP-1 is required for proteolysis of the intracellular LIN-12 domain in primary ventral precursor cells, and for protection of germ cells against ionizing radiation or camptothecin, as well as for normal a…	22.49	Y			ENSG00000069869	NEDD4	C2 domain
WBGene00000735	col-162	none available	22.48				ENSG00000133661	SFTPD	Nematode cuticle collagen, N-terminal
WBGene00003096	lys-7	lys-7 encodes an enzyme homologous to an antimicrobial lysozyme encoded by the LYS4 gene of the protozoan parasite Entamoeba histolytica; LYS-7 functions in the innate immune response as an antimicrobial enzyme that, by homology, hydrolyzes the 1,4-beta-linkages between N-acetyl-D-glucosamine and N-acetylmuramic acid in peptidoglycan heteropolymers of prokaryotic cell walls; loss of lys-7 activit…	22.47	Y		Y	n/a	n/a	n/a
WBGene00022048	fln-1	fln-1 encodes three protein isoforms, a full length filamin (fln-1a) orthologous to human filamin A, alpha (FLNA; OMIM:300017), of 2257 amino acids containing a well conserved N-terminal ABD and 20 Ig-like repeats and two trans-sliced versions with C- and N- terminal truncations are 1084 and 836 amino-acids respectively; expression of full-length filamin in hermaphrodites is required for normal b…	22.46	Y			ENSG00000136068	FLNB	Filamin/ABP280 repeat
WBGene00004703	rsp-6	rsp-6 encodes an RNA binding protein that is the C. elegans ortholog of the vertebrate SFRS3/SRp20 pre-mRNA splicing factors; although loss of rsp-6 activity alone results in no obvious abnormalities, RNAi experiments targeting multiple RSP proteins indicate that, in combination with other RSP proteins, RSP-6 plays a role in embryonic and larval development, germline sex determination (sperm-oocy…	22.3	Y			ENSG00000112081	SRSF3	RNA recognition motif domain
WBGene00014017	ZK632.10	none available	22.29				n/a	n/a	n/a
WBGene00007185	nlp-36	none available	22.26	Y			n/a	n/a	n/a
WBGene00019975	flp-34	none available	22.24				n/a	n/a	n/a
WBGene00005018	sqt-3	sqt-3 encodes a cuticle collagen; during development, sqt-3 activity is essential for viability and normal body morphology; genetic and expression studies indicate that SQT-3 is a cuticle component at all stages of development and that SQT-3 likely forms higher order cuticular structures with the DPY-17 cuticular collagen, both of which are candidate substrates for the DPY-31 procollagen C-protei…	22.23	Y			n/a	n/a	n/a
WBGene00016894	C53B7.3	none available	22.17	Y			n/a	n/a	n/a
WBGene00017970	F32A5.4	none available	22.17	Y			n/a	n/a	n/a
WBGene00206505	B0250.18	none available	22.14			Y	n/a	n/a	n/a
WBGene00000734	col-161	none available	22.07				ENSG00000133661	SFTPD	Nematode cuticle collagen, N-terminal
WBGene00001189	egl-21	egl-21 encodes a putative carboxypeptidase (whose homologs include human enkephalin convertase/carboxypeptidase E); EGL-21 is expressed throughout the nervous system; EGL-21 is required for normal synthesis of FMRFamide-like (FLP) and neuropeptide-like (NLP) peptides, and for normal egg-laying, locomotion, and defecation; EGL-21 promotes acetylcholine release at neuromuscular junctions; egl-21 mu…	22.06				ENSG00000106624	AEBP1	Peptidase M14, carboxypeptidase A
WBGene00006754	unc-15	The unc-15 gene encodes a paramyosin ortholog; UNC-15 protein physically interacts with MHC A, one isoform of myosin heavy chain (MHC) in striated muscle; UNC-15 accumulation is decreased in the absence of UNC-54 (myosin B), implying that degradation of UNC-15 is inhibited by its binding myosin B; conversely, myosin B (but not MYO-3/myosin A) fails to accumulate in unc-15 mutants.	22.01	Y	Y		ENSG00000143375	CGN	Myosin tail
WBGene00000209	asg-1	asg-1 encodes a homolog of the proton-translocating F0 ATP synthase complex subunit g; by homology, ASG-1 is predicted to function in ATP synthesis, although its precise role in ATP anabolism is not yet known; in C. elegans, asg-1 activity is required for transposon silencing in the germline, suggesting that healthy energy metabolism is necessary for this process; in addition, large-scale RNAi sc…	21.99		Y		ENSG00000249222	ATP5L2	ATPase, F0 complex, subunit G, mitochondrial
WBGene00018512	trpp-8	F46F11.9 encodes an ortholog of S. cerevisiae GSG1, involved in intracellular transport and meiosis; F46F11.9 shares an operon with vha-10, and thus might be a previously undescribed V-ATPase component or ancillary protein.	21.89	Y		Y	ENSG00000153339	TRAPPC8	TRAPP III complex, Trs85
WBGene00006919	vha-10	vha-10 encodes an ortholog of subunit G of the cytoplasmic (V1) domain of vacuolar proton-translocating ATPase (V-ATPase); VHA-10 is required for necrosis, since vha-10(RNAi) suppresses necrotic neurodegeneration and thapsigargin-induced cell death; VHA-10 is a predicted cytosolic stator (stalk) component.	21.89	Y			ENSG00000263014	ATP6V1G3	Vacuolar (H+)-ATPase G subunit
WBGene00021486	lbp-9	none available	21.84	Y			ENSG00000166426	CRABP1	Cytosolic fatty-acid binding
WBGene00013807	Y116A8C.30	none available	21.83				ENSG00000164182	NDUFAF2	NADH dehydrogenase [ubiquinone] 1 alpha subcomplex subunit 12
WBGene00000710	col-137	none available	21.8				ENSG00000019169	MARCO	Nematode cuticle collagen, N-terminal
WBGene00021888	Y54G2A.23	Y54G2A.23 is orthologous to the human genes CDNF (Conserved Dopamine Neurotrophic Factor), also known as ARMETL1 (Arginine-Rich Protein Mutated In Early Stage Tumors-Like 1) and MANF (Mesencephalic Astrocyte-derived Neurotrophic Factor); CDNF is involved in the survival and function of dopaminergic neurons.	21.8				ENSG00000185267	CDNF	SAP domain
WBGene00000666	col-91	col-91 encodes a cuticle collagen; loss of col-91 via large-scale RNAi results in no obvious defects.	21.78				ENSG00000133661	SFTPD	Nematode cuticle collagen, N-terminal
WBGene00003930	pat-3	pat-3 encodes the C. elegans beta-integrin subunit; pat-3 is an essential gene that is required for muscle cell attachment to the overlying hypodermis and for normal muscle filament assembly and function; in addition, pat-3 is required for normal axon guidance and for ovulation; antibody staining reveals that PAT-3 is expressed in body wall muscle as well as in the anal depressor, sphincter, inte…	21.76		Y		ENSG00000198542	ITGBL1	von Willebrand factor, type A
WBGene00000175	aqp-7	aqp-7 encodes an aquaglyceroporin whose expression in Xenopus oocytes increases either water or glycerol permeability five- to seven-fold; AQP-7 has no function in mass RNAi assays, perhaps reflecting genetic redundancy with its several paralogs; AQP-7 is expressed in muscle punctae (perhaps focal adhesions).	21.73	Y	Y		ENSG00000171885	AQP4	Major intrinsic protein
WBGene00017763	crls-1	crls-1 encodes a cardiolipin synthase; by homology, CRLS-1 is predicted to catalyze cardiolipin biosynthesis from phosphatidylglycerol and cytidinediphosphate-diacylglycerol, and loss of crls-1 activity results in reduced levels of cardiolipin and elevated levels of phosphatidylglycerol; in C. elegans, crls-1 activity is required for normal germ cell mitochondrial membrane potential and cristae m…	21.67				ENSG00000088766	CRLS1	CDP-alcohol phosphatidyltransferase
WBGene00008944	F19B2.5	none available	21.67	Y			n/a	n/a	n/a
WBGene00009882	vha-17	vha-17 (aka "fus-1") encodes an an ortholog of subunit e of the membrane-bound (V0) domain of vacuolar proton-translocating ATPase (V-ATPase); VHA-17, like VHA-1 and VHA-12, antagonizes EFF-1-mediated cell fusion in hypodermal cells; VHA-17 is expressed in gut cells of comma stage embryos, and in excretory cell and apical membranes of gut cells at later embryonic stages; VHA-17 is found in gut gr…	21.67	Y		Y	ENSG00000171130	ATP6V0E2	ATPase, V0 complex, subunit e1/e2
WBGene00022212	Y73B3A.10	none available	21.55				n/a	n/a	n/a
WBGene00022211	Y73B3A.9	none available	21.5	Y			n/a	n/a	n/a
WBGene00016739	pitr-1	none available	21.49	Y			ENSG00000168575	SLC20A2	Phosphate transporter
WBGene00006913	vha-4	vha-4 encodes an ortholog of subunit c"" of the membrane-bound (V0) domain of vacuolar proton-translocating ATPase (V-ATPase); VHA-4 is a predicted V-ATPase transmembrane rotor component; VHA-4 is paralogous to the c subunits VHA-1/-2/-3, and is predicted to help carry protons from the cytosol to a-subunits (VHA-5, VHA-6, VHA-7, or UNC-32) for transmembrane export; VHA-4 is required for ovulation…	21.45	Y			ENSG00000117410	ATP6V0B	V-ATPase proteolipid subunit C-like domain
WBGene00000672	col-97	col-97 encodes a cuticular collagen; loss of col-97 activity via large-scale RNAi screens results in defects in body morphology and locomotion.	21.42				n/a	n/a	n/a
WBGene00003162	mdh-2	mdh-2 encodes a homolog of malate dehydrogenase that is predicted to be mitochondrial.	21.4	Y	Y		ENSG00000146701	MDH2	Lactate/malate dehydrogenase, N-terminal
WBGene00010216	F57G8.7	none available	21.36				n/a	n/a	n/a
WBGene00006920	vha-11	vha-11 encodes, by alternative splicing, two isoforms of an ortholog of subunit C of the cytoplasmic (V1) domain of vacuolar proton-translocating ATPase (V-ATPase); VHA-11 is a predicted cytosolic stator (stalk) component; VHA-11 is found in dot-like structures around embryonic nuclei, with diffuse distribution in embryonic cytoplasm; in later embryos (comma stage onward), VHA-11 is found in gut …	21.32	Y			ENSG00000143882	ATP6V1C2	ATPase, V1 complex, subunit C
WBGene00006912	vha-3	vha-3 and vha-2 encode an ortholog of subunit c of the membrane-bound (V0) domain of vacuolar proton-translocating ATPase (V-ATPase); the protein encoded by vha-2 and vha-3 (VHA-2/3) is identical; VHA-2/3 is a predicted V-ATPase transmembrane rotor component; VHA-1 and VHA-2/3 comprise a closely related family of subunit c co-orthologs, predicted to carry protons from the cytosol to a-subunits (V…	21.32				ENSG00000185883	ATP6V0C	V-ATPase proteolipid subunit
WBGene00011638	ostb-1	none available	21.31	Y			ENSG00000244038	DDOST	Dolichyl-diphosphooligosaccharide--protein glycosyltransferase 48 kDa subunit
WBGene00007385	atp-5	none available	21.27	Y			ENSG00000167863	ATP5H	ATPase, F0 complex, subunit D, mitochondrial
WBGene00013394	Y62H9A.6	none available	21.2	Y			n/a	n/a	n/a
WBGene00000711	col-138	none available	21.18				ENSG00000019169	MARCO	Nematode cuticle collagen, N-terminal
WBGene00012471	Y17G7B.20	none available	21.11	Y			n/a	n/a	n/a
WBGene00022801	pcp-5	none available	21.1				ENSG00000176978	DPP7	Peptidase S28
WBGene00017374	ttr-41	none available	21.09	Y			n/a	n/a	n/a
WBGene00000647	col-71	none available	21.02	Y			ENSG00000206561	COLQ	Nematode cuticle collagen, N-terminal
WBGene00022366	Y92H12BL.5	The Y92H12BL.5 gene encodes a NUDIX hydrolase.	21	Y			ENSG00000177144	NUDT4P1	NUDIX hydrolase domain
WBGene00013263	Y57A10A.23	none available	20.94	Y			ENSG00000173467	AGR3	Thioredoxin-like fold
WBGene00003214	mel-32	mel-32 encodes a serine hydroxymethyltransferase; by homology, MEL-32 is predicted to catalyze the biochemical reaction that converts serine to glycine and in the process transfers a methyl group to tetrahydrofolate and, thus, into the one-carbon pool used for a variety of cellular metabolic processes; in C. elegans MEL-32 activity is required maternally for embryonic development past the 100-cel…	20.92				ENSG00000182199	SHMT2	Serine hydroxymethyltransferase
WBGene00015803	C15H9.9	none available	20.87	Y	Y		n/a	n/a	n/a
WBGene00019647	K11D12.7	none available	20.84	Y			n/a	n/a	n/a
WBGene00007707	C25A1.5	none available	20.83	Y			ENSG00000103089	FA2H	Cytochrome b5-like heme/steroid binding domain
WBGene00013884	ZC412.3	none available	20.83	Y	Y		n/a	n/a	n/a
WBGene00010597	K06A4.7	none available	20.81	Y			n/a	n/a	n/a
WBGene00018811	pmt-2	pmt-2 encodes an experimentally validated N-methyltransferase required for phosphocholine biosynthesis and viability; PMT-2 lacks known mammalian orthologs, but has orthologs in parasitic nematodes, fish, amphibians, echinoderms, plants, alveolata, and bacteria; PMT-2 is distantly paralogous to PMT-1; PMT-2 has a single C-terminal methyltransferase domain, unlike plant enzymes that have two tande…	20.81				n/a	n/a	n/a
WBGene00000616	col-39	col-39 encodes a collagen that is individually dispensable for viability and gross morphology in mass RNAi screens; the amino- and carboxyl-terminal cysteine-rich regions of COL-39 are most closely related to those of COL-8, COL-19, and COL-35.	20.77				ENSG00000133661	SFTPD	Nematode cuticle collagen, N-terminal
WBGene00000783	cpr-3	none available	20.76				ENSG00000164733	CTSB	Peptidase C1A, papain C-terminal
WBGene00008205	sams-1	sams-1 encodes an S-adenosyl methionine synthetase; by homology, SAMS-1 is predicted to function as a methyl-group donor in many biochemical reactions; sams-1 expression levels are negatively regulated by dietary restriction (as seen in eat-2 mutant animals), suggesting that increased lifespan due to dietary restriction is due, in part, to reducing the activity of key metabolic enzymes; loss of s…	20.65	Y			ENSG00000151224	MAT1A	S-adenosylmethionine synthetase
WBGene00006787	unc-52	The unc-52 gene encodes perlecan, a protein orthologous to human basement membrane-specific heparan sulfate proteoglycan core protein (HSPG2; OMIM:142461, which when mutated leads to Schwartz-Jampel syndrome or dyssegmental dysplasia); UNC-52 plays essential roles in muscle structure development and regulation of growth factor-like signaling pathways; UNC-52 is synthesized by the hypodermis and l…	20.64	Y	Y		ENSG00000154358	OBSCN	Laminin IV
WBGene00022276	nlp-40	nlp-40 encodes a neuropeptide-like protein; NLP-40 is secreted by the intestine and mediates the pacemaker function of the intestine that regulates the rhythmic defecation motor program; NLP-40 likely functions with the AEX-2 G protein-coupled receptor, expressed on GABAergic neurons, to regulate GABA release and effect contraction of the enteric muscles.	20.59	Y			n/a	n/a	n/a
WBGene00013077	ttr-24	none available	20.59	Y	Y		n/a	n/a	n/a
WBGene00022793	ZK686.3	ZK686.3 is orthologous to the putative tumor suppressor candidate 3 (TUSC3); TUSC3 is involved in plasma membrane magnesium ion transport; ZK686.3 is also orthologous to the S. cerevisiae dolichyl-diphosphooligosaccharide-protein glycotransferase gamma chain (34-kD) subunit, OST3.	20.48	Y			ENSG00000102158	MAGT1	Thioredoxin-like fold
WBGene00000567	cnx-1	cnx-1 encodes the C. elegans ortholog of calnexin, a type I Ca2+-binding integral membrane protein of the endoplasmic reticulum (ER); CNX-1 binds calcium and is predicted to function as a molecular chaperone required for glycoprotein folding and maturation as well as regulation of intracellular calcium homeostasis; in C. elegans, cnx-1 activity is required at 25 degrees C for wild-type levels of …	20.39	Y			ENSG00000153132	CLGN	Calreticulin/calnexin
WBGene00013682	Y105E8A.25	none available	20.32	Y			ENSG00000268861	n/a	Dbl homology (DH) domain
WBGene00013393	Y62H9A.5	none available	20.32				n/a	n/a	n/a
WBGene00020115	mboa-6	mboa-6 encodes, by alternative splicing, two isoforms of a putative transmembrane O-acyl transferase (MBOAT) that incorporates exogenous arachidonic acid into phosphatidylcholine (PC), phosphatidylserine (PS) and phosphatidylethanolamine (PE); MBOA-6 is required for normal larval development and body morphology, and for normally rapid growth; MBOA-6 is orthologous to Drosophila NESSY and human MB…	20.31				ENSG00000111684	LPCAT3	Membrane bound O-acyl transferase, MBOAT
WBGene00006779	unc-43	unc-43 encodes the C. elegans ortholog of type II calcium/calmodulin-dependent protein kinase (CaMKII); unc-43 activity is required for a number of processes, including locomotion, neuronal cell fate specification and regulation of synaptic density, egg laying, defecation, and meiotic maturation; in regulating some of these processes, unc-43 acts in concert with MAPKKK and G protein signaling pat…	20.3	Y			ENSG00000058404	CAMK2B	Protein kinase domain
WBGene00012253	clec-50	none available	20.25				ENSG00000185303	SFTPA2	C-type lectin
WBGene00002183	kat-1	kat-1 encodes a predicted 3-ketoacyl-coA thiolase, a conserved enzyme in the mitochondrial fatty acid beta-oxidation pathway; kat-1 acts synergistically with tub-1 and together with the Bardet-Biedl syndrome protein BBS1 ortholog, bbs-1, to regulate lipid accumulation; genetic interaction studies of kat-1 with che-2, osm-5 and daf-6, genes that are required for ciliary structure and intraflagella…	20.17		Y		ENSG00000120437	ACAT2	Thiolase
WBGene00020166	T02G5.7	The T02G5.7 gene encodes a homolog of the human gene ACAT1, which when mutated leads to alpha-methylacetoaceticaciduria (OMIM:203750).	20.17				ENSG00000120437	ACAT2	Thiolase
WBGene00000223	atf-7	atf-7 encodes a basic-region leucine zipper (bZIP) transcription factor orthologous to members of the ATF2/ATF7/CREB5 family of cyclic AMPresponse element binding (CREB)/activating transcription factors (ATFs); ATF-7 plays a key role in the innate immune response by regulating the expression of immune genes downstream of PMK-1/p38 MAPK; ATF-7 is likely converted from a transcriptional repressor t…	20.11	Y			ENSG00000170653	ATF7	Basic-leucine zipper domain
WBGene00022205	Y73B3A.3	none available	20.11				ENSG00000198643	FAM3D	n/a
WBGene00003559	ncl-1	ncl-1 encodes a cytoplasmic B-box zinc finger protein that negatively regulates rRNA and 5S RNA transcription, nucleolus size, and body size; NCL-1 is orthologous to Drosophila BRAIN TUMOR (BRAT), and ncl-1 mutants can be rescued by brat transgenes; NCL-1 is required for the normally small size of neuronal, muscle, and hypodermal nucleoli, and is already active in 4-cell embryos; NCL-1 may be a r…	20.1	Y		Y	ENSG00000110171	TRIM3	B-box-type zinc finger
WBGene00001172	egl-3	The egl-3 gene encodes a homolog of a mammalian proprotein convertase that participates in peptide secretion.	20.09				ENSG00000125851	PCSK2	Peptidase S8/S53 domain
WBGene00013181	Y53H1B.2	none available	20.08	Y	Y		n/a	n/a	n/a
WBGene00000403	casy-1	casy-1 encodes a type I transmembrane protein with two extracellular cadherin domains and an LG/LNS domain that is the sole C. elegans calsyntenin/alcadein ortholog; genetic studies indicate that in C. elegans casy-1 activity is required, in parallel to the insulin-like signaling pathway, for several types of learning, including salt chemotaxis learning, temperature learning, olfactory adaptation…	20.05	Y		Y	ENSG00000158258	CLSTN2	Cadherin
WBGene00016658	C45B2.1	none available	19.91			Y	n/a	n/a	n/a
WBGene00013094	Y51H1A.3	Y51H1A.3 encodes the C. elegans ortholog of NDUFB8, an accessory subunit of the mitochondrial respiratory chain NADH:ubiquinone oxidoreductase (Complex I); large-scale RNAi screens indicate that Y51H1A.3 activity is required for embryonic and larval development, normal brood size, and molting.	19.88				ENSG00000166136	NDUFB8	NADH dehydrogenase [ubiquinone] 1 beta subcomplex subunit 8
WBGene00000649	col-73	none available	19.86				ENSG00000019169	MARCO	Nematode cuticle collagen, N-terminal
WBGene00011276	aakg-5	aakg-5 encodes one of five C. elegans AMP kinase (AMPK) gamma regulatory subunits.	19.83				ENSG00000181929	PRKAG1	CBS domain
WBGene00019957	R08E3.1	none available	19.79			Y	n/a	n/a	n/a
WBGene00019958	R08E3.2	none available	19.79				n/a	n/a	n/a
WBGene00015413	pdhb-1	C04C3.3 encodes the C. elegans ortholog of the pyruvate dehydrogenase complex E1 beta subunit (PDHB); by homology to mammalian enzymes, the product of C04C3.3 is predicted to function in mitochondria to catalyze the irreversible decarboxylation of pyruvate to acetyl-CoA.	19.68	Y			ENSG00000168291	PDHB	Transketolase-like, pyrimidine-binding domain
WBGene00044206	T26H5.9	none available	19.61	Y			n/a	n/a	n/a
WBGene00012759	sup-1	sup-1 encodes a novel, single-pass transmembrane protein; sup-1 was identified as an allele-specific dominant suppressor of unc-17(e245); unc-17 encodes a synaptic vesicle acetylcholine transporter and the e245 missense mutation results in substitution of arginine for glycine in the ninth transmembrane domain and reduced levels of UNC-17 protein; sup-1 is defined by several alleles that all behav…	19.6	Y			n/a	n/a	n/a
WBGene00000606	col-17	col-17 encodes a collagen which is expressed in all developmental stages except eggs, like col-15, col-16, and col-20; collagen genes with this expression pattern may be used for synthesis of cuticles after the L1 stage (e.g., the L4 cuticle).	19.58				ENSG00000124160	NCOA5	n/a
WBGene00000140	anc-1	anc-1 encodes a protein, orthologous to Drosophila MSP 300 and mammalian SYNE1 and SYNE2 proteins; ANC-1 has coiled regions, a nuclear envelope localization domain (the KASH domain) and an actin-binding domain; ANC-1 affects the positioning of nuclei and mitochondria within the cytoskeleton; ANC-1 is expressed in the cytoplasm, but is localized to the nuclear periphery in an UNC-84 dependent mann…	19.57	Y		Y	ENSG00000173230	GOLGB1	Calponin homology domain
WBGene00020114	pde-4	pde-4 encodes a cAMP phosphodiesterase orthologous to Drosophila dunce and the mammalian PDE4 family of phosphodiesterases; genetic analysis indicates that pde-4 activity is required for negative regulation of cAMP pools in the synaptic signaling network that controls locomotory rates and for regulation of sleep-like behavior (lethargus) during larval development; antibody staining of adult anima…	19.56	Y		Y	n/a	n/a	n/a
WBGene00021883	Y54G2A.18	none available	19.55				ENSG00000075790	BCAP29	B-cell receptor-associated protein 29/31
WBGene00010086	F55B11.4	none available	19.52				n/a	n/a	n/a
WBGene00000380	cct-5	cct-5 encodes, by alternative splicing, two isoforms of a putative epsilon subunit of the eukaryotic cytosolic ("T complex") chaperonin, orthologous to human CCT5 (OMIM:610150, mutated in sensory neuropathy with spastic paraplegia); CCT-5 represses SKN-1-dependent transcription of gst-4; in mass RNAi assays, cct-5 is required for normal embryonic osmotic integrity, transgene subcellular localizat…	19.5	Y			ENSG00000150753	CCT5	Chaperonin Cpn60/TCP-1 family
WBGene00020854	T27C4.1	none available	19.5	Y			n/a	n/a	n/a
WBGene00001501	ftn-2	ftn-2 encodes one of two C. elegans ferritin heavy chain homologs; loss of ftn-2 activity via deletion mutation results in slightly lower brood sizes and, under iron stress conditions, slightly faster growth from the L4 to adult stage of development, and slightly reduced lifespan; an ftn-2::gfp reporter fusion is expressed in diverse tissues, including the pharynx, intestine, and hypodermis, and …	19.45	Y			ENSG00000087086	FTL	Ferritin
WBGene00008404	D2013.6	none available	19.43	Y			ENSG00000183066	WBP2NL	GRAM domain
WBGene00001558	gdi-1	gdi-1 encodes a member of the Rab GDP dissociation inhibitor (GDI) family with high similarity to Drosophila Gdi; expressed around the pharyngeal, vulval, and tail regions.	19.4	Y			ENSG00000057608	GDI2	Rab GDI protein
WBGene00003759	nlp-21	nlp-21 encodes nine predicted neuropeptide-like proteins; in C. elegans, nlp-21 is part of the GGARAF neuropeptide family that also contains nlp-9; nlp-21 is expressed in a variety of neurons, including AFD, five head neurons, the ventral nerve cord, one anterior pharyngeal neuron, and one tail neuron; nlp-21 expression is also detected in the embryo and the intestine; NLP-21 is tranported by den…	19.4				n/a	n/a	n/a
WBGene00021960	Y57E12AM.1	none available	19.38				ENSG00000134825	TMEM258	Transmembrane protein 258
WBGene00002008	hsp-4	hsp-4 encodes one of two C. elegans heat shock response 70 (hsp70) proteins homologous to mammalian grp78/BiP (glucose regulated protein 78/immunoglobulin heavy chain-binding protein, OMIM:138120); hsp-4 affects embryonic and larval viability; hsp-4 is expressed in several tissues including the hypodermis, intestine, and spermatheca; hsp-4 transcription is upregulated in response to endoplasmic r…	19.35	Y		Y	ENSG00000226704	HSPA1L	Heat shock protein 70 family
WBGene00020181	T02H6.11	none available	19.3	Y			ENSG00000156467	UQCRB	Cytochrome b-c1 complex subunit 7
WBGene00044134	D1025.10	none available	19.27	Y			n/a	n/a	n/a
WBGene00206419	R106.5	none available	19.27	Y			n/a	n/a	n/a
WBGene00000183	arf-3	arf-3 encodes a member of the ADP-ribosylation factor related protein family; likely expressed in touch receptors and regulated by MEC-3.	19.26	Y			ENSG00000272822	n/a	Small GTP-binding protein domain
WBGene00018605	F48E3.4	none available	19.21				n/a	n/a	n/a
WBGene00002263	lea-1	The lea-1 gene encodes a protein that is predicted to be hydrophilic and heat-resistant, and that might participate in anhydrobiosis.	19.21	Y			ENSG00000167676	PLIN4	Apolipoprotein A/E
WBGene00012768	eef-1B.2	none available	19.2	Y	Y	Y	ENSG00000255561	FDXACB1	Translation elongation factor EF1B, beta/delta subunit, guanine nucleotide exchange domain
WBGene00002980	lgg-1	lgg-1 encodes the C. elegans ortholog of Saccharomyces cerevisiae Atg8p and mammalian MAP-LC3; by homology, LGG-1 is predicted to be required for the degradation of cellular components by autophagy; loss of lgg-1 function via RNAi indicates that, like several other C. elegans genes involved in autophagy, lgg-1 is essential for normal dauer morphogenesis and life-span extension; a GFP::LGG-1 repor…	19.2	Y			ENSG00000034713	GABARAPL2	Autophagy protein Atg8 ubiquitin-like
WBGene00044737	ttr-45	none available	19.2			Y	n/a	n/a	n/a
WBGene00012769	Y41E3.11	none available	19.2	Y			ENSG00000214753	HNRNPUL2	SAP domain
WBGene00000998	dig-1	dig-1 encodes a giant member of the immunoglobulin superfamily; dig-1 functions cell non-autonomously to mediate axon fasciculation and maintenance of cell body position within ganglia; dig-1 is also required for proper placement of the gonad; dig-1 is initially expressed in the developing embryonic gut and then expressed by a number of different muscle cells, including the body wall, head, vulva…	19.16	Y	Y	Y	ENSG00000181143	MUC16	EGF-like domain
WBGene00006917	vha-8	vha-8 encodes an ortholog of subunit E of the cytoplasmic (V1) domain of vacuolar proton-translocating ATPase (V-ATPase); VHA-8 is a predicted cytosolic stator (stalk) component; VHA-8 is required for embryonic and larval viability, for ovulation, and for receptor-mediated endocytosis of yolk protein; VHA-8 is highly expressed in the cytoplasm of excretory canals throughout development, and in th…	19.13	Y			ENSG00000250565	ATP6V1E2	ATPase, V1/A1 complex, subunit E
WBGene00001604	gln-3	none available	19.02	Y	Y		ENSG00000135821	GLUL	Glutamine synthetase, catalytic domain
WBGene00017127	E04F6.8	none available	19				n/a	n/a	n/a
WBGene00008110	C46C2.2	none available	18.9				n/a	n/a	n/a
WBGene00013605	Y95D11A.1	none available	18.9	Y			n/a	n/a	n/a
WBGene00006536	tbb-1	This gene encodes a homolog of mammalian beta-tubulin (TUBB) that is expressed at high levels in the germline; TBB-1 is redundant for embryonic viability, due to its paralog TBB-2.	18.89	Y		Y	ENSG00000173876	n/a	Tubulin
WBGene00012354	W09C5.8	W09C5.8 encodes the C. elegans ortholog of the cytochrome c oxidase (COX) subunit IV (COX IV); loss of W09C5.8 activity via RNAi results in a shortened life span, reduced fertility, and defects in mitochondrial respiratory chain function.	18.88	Y			ENSG00000131055	COX4I2	Cytochrome c oxidase subunit IV family
WBGene00004143	pqn-59	pqn-59 encodes a protein containing a glutamine/asparagine (Q/N)-rich domain and similarity to the vertebrate ubiquitin-associated proteins UBAP2 and UBAP2L; microarray experiments indicate that pqn-59 is expressed maternally and embryonically and in situ hybridization studies show that pqn-59 mRNA exhibits strong germline expression; loss of pqn-59 activity via RNAi in a wild-type background res…	18.86	Y			ENSG00000143569	UBAP2L	UBA-like
WBGene00020089	R119.3	none available	18.86	Y		Y	ENSG00000196368	NUDT11	Short-chain dehydrogenase/reductase SDR
WBGene00011128	R07H5.8	none available	18.85	Y			ENSG00000156110	ADK	Adenosine kinase
WBGene00008707	F11E6.3	none available	18.84	Y			ENSG00000189139	FSCB	n/a
WBGene00020437	stt-3	none available	18.84	Y			ENSG00000134910	STT3A	Oligosaccharyl transferase, STT3 subunit
WBGene00000230	atp-3	atp-3 encodes the C. elegans homolog of the ATP5O subunit of mitochondrial ATP synthase (complex V); as part of the ATP synthase complex, ATP-3 controls respiration and regulates growth rate and body size, aging, and rates of behaviors such as pharyngeal pumping, defecation, and locomotion; loss of atp-3 function during larval development indicates that respiratory rates established during develo…	18.82	Y			ENSG00000249209	n/a	ATPase, OSCP/delta subunit
WBGene00017855	F27C1.6	none available	18.82	Y		Y	ENSG00000253797	UTP14C	Small-subunit processome, Utp14
WBGene00003372	mlc-4	mlc-4 encodes, along with mlc-1 and mlc-2, one of three C. elegans regulatory myosin light chains; mlc-4 appears to encode the sole C. elegans regulatory light chain for nonmuscle myosin and during development, mlc-4 activity is required maternally for cytokinesis in meiosis and mitosis and for establishment of some aspects of anterior-posterior polarity in the early embryo; further, RNA interfer…	18.82	Y		Y	ENSG00000101608	MYL12A	EF-hand domain
WBGene00007142	ttr-18	none available	18.77	Y			n/a	n/a	n/a
WBGene00018777	F53H1.3	none available	18.74	Y			ENSG00000174839	DENND6A	AVL9/DENND6 domain
WBGene00000378	cct-2	cct-2 encodes a putative beta subunit of the eukaryotic cytosolic ("T complex") chaperonin, orthologous to human CCT2 (OMIM:605139); CCT-2 is expressed in most, if not all, tissues; CCT-2 represses SKN-1-dependent transcription of gst-4; CCT-2 is expressed in touch receptor neurons in a MEC-3-dependent fashion; in mass RNAi assays, CCT-2 is required for normal transgene repression and subcellular…	18.73				ENSG00000166226	CCT2	Chaperonin Cpn60/TCP-1 family
WBGene00011883	mrpl-50	none available	18.73	Y	Y	Y	ENSG00000136897	MRPL50	Ribosomal protein L50, mitochondria
WBGene00019510	K07H8.10	none available	18.71	Y			ENSG00000115053	NCL	RNA recognition motif domain
WBGene00021844	Y54E10BR.5	none available	18.71				ENSG00000140612	SEC11A	Peptidase S26B
WBGene00002010	hsp-6	hsp-6 encodes a nuclear-encoded mitochondrion-specific chaperone that is a member of the DnaK/Hsp70 superfamily of molecular chaperones; hsp-6 is involved in the mitochondrial unfolded protein response, as hsp-6 expression, normally broadly detected from the L1 larval through adult stages of development, is greatly increased in response to treatments that disrupt mitochondrial protein handling; l…	18.7	Y		Y	ENSG00000113013	HSPA9	Chaperone DnaK
WBGene00015280	C01B10.6	none available	18.67				n/a	n/a	n/a
WBGene00000256	bli-6	bli-6 encodes a collagen involved in adult cuticle structure.	18.64				ENSG00000019169	MARCO	Nematode cuticle collagen, N-terminal
WBGene00007390	lmtr-3	none available	18.6				n/a	n/a	n/a
WBGene00001328	epi-1	epi-1 encodes one of two C. elegans laminin alpha chains; epi-1 affects oogenesis due to its affect on gonad development, and also affects cell migrations, axon extension and GABAergic defasciculation, morphology of the VD and DD motor neurons, body morphology, locomotion, gonad sheath epithelialization, body muscle structure, and germ cell proliferation.	18.51	Y	Y		ENSG00000135862	LAMC1	Laminin IV
WBGene00001076	dpy-17	dpy-17 encodes a cuticle collagen; during development, dpy-17 activity is required for normal body morphology, hermaphrodite tail development, and outgrowth of posterior canal cell processes; genetic and immunofluorescence studies suggest that extracellular assembly of DPY-17 and the essential SQT-3 cuticle collagen is interdependent, as loss of dpy-17 activity results in intracellular retention …	18.47	Y			ENSG00000206561	COLQ	Nematode cuticle collagen, N-terminal
WBGene00002189	kin-1	kin-1 encodes multiple isoforms of a serine/threonine protein kinase that is orthologous to cAMP-dependent protein kinase (protein kinase A or PKA) catalytic subunits; KIN-1 is able to phosphorylate histone H2B in vitro and is associated with both particulate (~65%) and cytosolic (35%) cellular fractions; KIN-1 is expressed at low levels during embryogenesis, but its expression level increases in…	18.45	Y	Y		ENSG00000183943	PRKX	Protein kinase domain
WBGene00006959	xbp-1	xbp-1 encodes a bZIP transcription factor orthologous to yeast Hac1 and mammalian X box-binding protein 1 (XBP-1, OMIM:194355); XBP-1 is required for the unfolded protein response (UPR) that counteracts cellular stress induced by accumulation of unfolded proteins in the endoplasmic reticulum (ER); xbp-1 mRNA is spliced by the IRE-1 endoribonuclease to promote translation of transcriptionally acti…	18.45	Y			ENSG00000100219	XBP1	Basic-leucine zipper domain
WBGene00000912	daf-16	daf-16 encodes the sole C. elegans forkhead box O (FOXO) homologue; DAF-16 functions as a transcription factor that acts in the insulin/IGF-1-mediated signaling (IIS) pathway that regulates dauer formation, longevity, fat metabolism, stress response, and innate immunity; DAF-16 regulates these various processes through isoform-specific expression, isoform-specific regulation by different AKT kina…	18.41	Y			ENSG00000204060	FOXO6	Fork head domain
WBGene00007709	clec-87	clec-87 encodes a C-type lectin, paralogous to CLEC-88, C25B8.4, F26D10.12, and ZK858.3; CLEC-87 has a single chondroitin attachment site verified by mass spectrometry; clec-87 expression is upregulated in response to pathogen infection.	18.4	Y		Y	ENSG00000256797	KLRF2	C-type lectin
WBGene00016118	C25H3.9	C25H3.9 encodes the C. elegans ortholog of the NDUFB5/SGDH subunit of the mitochondrial NADH dehydrogenase (ubiquinone) complex (complex I).	18.38				ENSG00000136521	NDUFB5	NADH:ubiquinone oxidoreductase, NDUFB5/SGDH subunit
WBGene00194706	C53A5.16	none available	18.38				n/a	n/a	n/a
WBGene00019914	clec-150	none available	18.36				n/a	n/a	n/a
WBGene00016594	C42D4.1	none available	18.35				n/a	n/a	n/a
WBGene00017850	F27B10.1	none available	18.34			Y	n/a	n/a	n/a
WBGene00001074	dpy-13	dpy-13 encodes a member of the collagen superfamily containing 20 copies of the collagen triple helix repeat; transcipt levels oscillate, peaking once during each larval stage.	18.29	Y			ENSG00000240654	C1QTNF9	Nematode cuticle collagen, N-terminal
WBGene00003097	lys-8	lys-8 encodes a putative lysozyme required for normal longevity, probably because it prevents killing of C. elegans by bacteria infecting its gut; LYS-8 is expressed in intestine up to the terminal bulb of the pharynx, as well as in g1 and g2 pharyngeal gland cells; LYS-8 expression is induced by infection with Serratia marcescens, Pseudomonas aeruginosa, or (weakly) by Microbacterium nematophilu…	18.29				n/a	n/a	n/a
WBGene00022734	ZK418.5	none available	18.22	Y		Y	ENSG00000105677	TMEM147	Protein of unknown function DUF2053, membrane
WBGene00009161	F26E4.6	none available	18.18	Y			n/a	n/a	n/a
WBGene00008263	C53A5.2	none available	18.16			Y	ENSG00000126814	TRMT5	n/a
WBGene00020683	ribo-1	none available	18.15	Y			ENSG00000163902	RPN1	Ribophorin I
WBGene00001066	dpy-4	dpy-4 encodes a cuticle collagen; dpy-4 activity is required for normal body morphology, locomotion, and larval development.	18.14				ENSG00000019169	MARCO	Nematode cuticle collagen, N-terminal
WBGene00011349	T01H3.3	none available	18.11	Y			n/a	n/a	n/a
WBGene00019205	kcc-2	kcc-2 encodes a potassium chloride cotransporter; in C. elegans, kcc-2 acts partially redundantly with the sodium-driven chloride-bicarbonate transporter, abts-1, for effecting GABA-receptor mediated inhibitory neurotransmission in the HSNs (hermaphrodite-specific neurons) that control egg-laying and in body wall muscle to control body length and movement; neuronal expression studies indicate tha…	17.97				ENSG00000140199	SLC12A6	Amino acid permease/ SLC12A domain
WBGene00006807	unc-75	unc-75 encodes an RNA-binding protein with two N-terminal RNA recognition motifs (RRMs), a glutamine/asparagine-rich linker domain, and a third C-terminal RRM that is orthologous to the mammalian CELF/BrunoL proteins that control pre-mRNA splicing; UNC-75 is required for neuron-specific splicing of unc-32 mRNA; UNC-75 binds the unc-32 intron 7a in vitro; both UNC-75 and EXC-7 are required in para…	17.93	Y		Y	ENSG00000273025	n/a	RNA recognition motif domain
WBGene00019261	H34I24.2	none available	17.87				n/a	n/a	n/a
WBGene00044686	flp-28	none available	17.84	Y			n/a	n/a	n/a
WBGene00013766	prmt-1	prmt-1 encodes a type I protein arginine methyltransferase; in C. elegans, PRMT-1 positively regulates adult lifespan and is required for stress response and fat storage in the absence of DAF-2-mediated signaling; PRMT-1 is also required for proper development of myofilament structure; PRMT-1 physically interacts with, and methylates, DAF-16 thereby preventing its phosphorylation and cytoplasmic …	17.8	Y			ENSG00000111218	PRMT8	Protein arginine N-methyltransferase
WBGene00007020	mdt-20	none available	17.76				ENSG00000124641	MED20	Mediator complex, subunit Med20
WBGene00022427	Y104H12D.3	none available	17.76				ENSG00000166224	SGPL1	Pyridoxal phosphate-dependent decarboxylase
WBGene00019831	R02F2.1	none available	17.75	Y			ENSG00000205089	CCNI2	Cyclin, N-terminal
WBGene00006519	tag-174	none available	17.74	Y	Y		ENSG00000226976	n/a	Cytochrome c oxidase, subunit VIa
WBGene00001725	grl-16	grl-16 encodes, by alternative splicing, two hedgehog-like proteins with an N-terminal signal sequence, a central proline-rich low-complexity region, and a C-terminal Ground-like (Grl) domain; the Grl domain is predicted to form a cysteine-crosslinked protein involved in intercellular signalling, and it has subtle similarity to the N-terminal Hedge domain of HEDGEHOG proteins.	17.62				n/a	n/a	n/a
WBGene00000182	arf-1.2	arf-1.2 encodes an ADP-ribosylation factor homolog required in vivo for embryonic development, fertility, locomotion, vulval development, and cuticular synthesis; ARF proteins are N-myristoylated GTPases that regulate membrane traffic and the actin cytoskeleton, and that activate both phospholipase D1 (PLD1) and phosphatidylinositol 4-phosphate 5-kinase.	17.59	Y			ENSG00000113595	TRIM23	Small GTP-binding protein domain
WBGene00044650	Y71G10AR.4	none available	17.56	Y			ENSG00000253598	SLC10A5	Bile acid:sodium symporter/arsenical resistance protein Acr3
WBGene00018152	acs-4	none available	17.52	Y		Y	ENSG00000197142	ACSL5	AMP-dependent synthetase/ligase
WBGene00022515	ttr-48	none available	17.52	Y			n/a	n/a	n/a
WBGene00015933	C17H12.8	none available	17.49				n/a	n/a	n/a
WBGene00019693	ostd-1	none available	17.44				ENSG00000118705	RPN2	Dolichyl-diphosphooligosaccharide--protein glycosyltransferase subunit Swp1
WBGene00007836	C31C9.2	C31C9.2 is orthologous to the human gene PHOSPHOGLYCERATE DEHYDROGENASE (PHGDH; OMIM:606879), which when mutated leads to phosphoglycerate dehydrogenase deficiency.	17.43	Y			ENSG00000092621	PHGDH	D-isomer specific 2-hydroxyacid dehydrogenase, catalytic domain
WBGene00003891	osm-11	osm-11 encodes a protein required for normal osmosensation, osmotic resistance, and defecation rhythm, and for fully normal growth rate; OSM-11 has no clear orthologs outside of nematodes, but is paralogous to DOS-1, OSM-7, and K02F3.7, has a predicted signal sequence with 12 conserved cysteine residues, and may be secreted; osm-11 mutants have abnormally high levels of internal glycerol, defecti…	17.43	Y			n/a	n/a	n/a
WBGene00016195	C28H8.4	none available	17.4	Y			ENSG00000100196	KDELR3	ER lumen protein retaining receptor
WBGene00010896	M28.5	none available	17.36	Y			ENSG00000100138	SNU13	H/ACA ribonucleoprotein complex, subunit Nhp2, eukaryote
WBGene00009829	F47G9.1	none available	17.35	Y			ENSG00000170348	TMED10	GOLD domain
WBGene00021641	Y47G6A.15	none available	17.35				n/a	n/a	n/a
WBGene00021627	Y47D7A.15	none available	17.34				n/a	n/a	n/a
WBGene00022354	Y82E9BR.22	none available	17.31				n/a	n/a	n/a
WBGene00001393	fat-1	fat-1 encodes an omega-3 fatty acyl desaturase that acts on substrates of 16-20 carbons with a preference for omega-6 fatty acids; FAT-1 dehydrogenates its substrates 3 carbons from the methyl terminus; FAT-1 is required in vivo for n3 polyunsaturated fatty acid (PUFA) synthesis; the fatty acids of fat-1(wa9) mutants consist of 20% arachidonic acid (20:4n6), instead of the 20% eicosapentaenoic ac…	17.29	Y		Y	n/a	n/a	n/a
WBGene00021331	glrx-10	glrx-10 encodes a glutaredoxin, oxidoreductases of the thioredoxin family; by homology, GLRX-10 is predicted to function in regulation of the thiol redox state of proteins.	17.26				ENSG00000023572	GLRX2	Glutaredoxin
WBGene00010703	K09A9.6	none available	17.23		Y		ENSG00000174939	ASPHD1	Aspartyl/asparaginy/proline hydroxylase
WBGene00009688	F44E5.1	none available	17.18	Y	Y	Y	n/a	n/a	n/a
WBGene00007055	tag-196	none available	17.16	Y		Y	ENSG00000163131	CTSS	Cystatin domain
WBGene00010723	cpg-7	cpg-7 encodes a small (116-residue), putatively secreted protein with 11 potential chondroitin attachment sites, 6 of them verified by mass spectrometry.	17.13	Y			n/a	n/a	n/a
WBGene00001564	icl-1	icl-1 encodes a predicted isocitrate lyase/malate synthase, an enzyme known to function in the glyoxylate cycle; ICL-1 was identified in a screen for proteins that interact with GEX-3, a homolog of human HEM-2 which is required for embryonic development; ICL-1 is required for embryonic morphogenesis and appears to act downstream of DAF-16 to influence lifespan.	17.13	Y	Y		n/a	n/a	n/a
WBGene00012018	T25C12.3	none available	17.06	Y		Y	n/a	n/a	n/a
WBGene00022564	ZC204.14	none available	16.95				n/a	n/a	n/a
WBGene00007786	rmd-2	none available	16.9	Y			ENSG00000137824	RMDN3	Tetratricopeptide-like helical domain
WBGene00018951	F56C9.7	F56C9.7 encodes a protein containing a DUF1261 (Domain of unknown function 1261) domain that is conserved amongst nematodes; loss of F56C9.7 activity results in decreased intestinal dipeptide transport and slightly increased fat storage; loss of F56C9.7 activity in a bar-1 mutant background also results in developmental variation; large-scale expression studies indicate that F56C9.7 is expressed …	16.86				n/a	n/a	n/a
WBGene00006918	vha-9	vha-9 encodes an ortholog of subunit F of the cytoplasmic (V1) domain of vacuolar proton-translocating ATPase (V-ATPase); VHA-9 is a predicted cytosolic rotor (stalk) component.	16.86	Y			ENSG00000226138	n/a	ATPase, V1 complex, subunit F, eukaryotic
WBGene00019327	zip-2	zip-2 encodes a bZIP transcription factor; ZIP-2 activity is required for regulating one branch of the immune response pathway that responds to infection by virulent strains of the bacterial pathogen Pseudomonas aeruginosa; specifically, ZIP-2 is required for inducing expression of a subset of infection response genes, including irg-1 and irg-2, and for full resistance to P. aeruginosa infection.	16.86	Y			n/a	n/a	n/a
WBGene00019624	K10C9.3	none available	16.85				ENSG00000249141	n/a	Ribonuclease T2-like
WBGene00022491	Y119D3B.14	Y119D3B.14 encodes the the C. elegans ortholog of mitochondrial translation elongation factor G2 (EFG2), a GTP-binding protein essential for the elongation phase of protein synthesis; loss of Y119D3B.14 activity via RNAi in a wild-type background results in embryonic and larval lethality, sterility, body morphology defects, and slow growth rates.	16.79				ENSG00000168827	GFM1	Translation elongation factor EFG, V domain
WBGene00017070	praf-3	none available	16.77	Y	Y		ENSG00000243279	PRAF2	Prenylated rab acceptor PRA1
WBGene00018764	F53F10.2	none available	16.76	Y		Y	ENSG00000155096	AZIN1	Ornithine/DAP/Arg decarboxylase
WBGene00004174	abu-14	The protein product of abu-14 is predicted to contain a glutamine/asparagine (Q/N)-rich ("prion") domain; abu-14 is transcriptionally up-regulated during times of cuticle synthesis, such as in late embryogenesis and in the molts; it is localized to the pharyngeal cuticle and is required for the function of the pharyngeal grinder.	16.74	Y			n/a	n/a	n/a
WBGene00011571	ttr-46	none available	16.7	Y			n/a	n/a	n/a
WBGene00000502	chp-1	chp-1 encodes a protein containing two CHORD domains that is required for embryonic polarity, germline development, and vulval development.	16.58				ENSG00000147166	ITGB1BP2	CHORD domain
WBGene00003924	pas-3	pas-3 encodes a proteasome subunit alpha type-4 that affects embryonic viability, growth, fertility, and locomotion.	16.58	Y	Y		ENSG00000041357	PSMA4	Proteasome alpha-subunit, N-terminal domain
WBGene00015809	C16A3.4	none available	16.5	Y			ENSG00000173545	ZNF622	Zinc finger, U1-type
WBGene00015810	C16A3.5	none available	16.5	Y			ENSG00000147684	NDUFB9	Complex 1 LYR protein
WBGene00022347	Y82E9BR.14	none available	16.45				ENSG00000134297	n/a	Glycolipid transfer protein domain
WBGene00007645	C17E4.6	none available	16.43	Y			ENSG00000163159	VPS72	Vps72/YL1 family
WBGene00007646	nkb-1	none available	16.43	Y			ENSG00000186009	ATP4B	Sodium/potassium-transporting ATPase subunit beta
WBGene00045394	ZK813.7	none available	16.42				n/a	n/a	n/a
WBGene00016539	madd-2	madd-2 encodes a protein containing RBCC/TRIM, fibronectin type III, and SPRY domains that is the sole C. elegans member of the C1 subfamily of tripartite motif (TRIM) proteins and is homologous to mammalian TRIM9, TRIM67, and MID1/TRIM18, mutations in which result in Opitz G/BBB syndrome, a congenital malformation disorder affecting ventral midline structures and resulting in mental retardation;…	16.41	Y			ENSG00000213186	TRIM59	B-box-type zinc finger
WBGene00010317	idh-1	idh-1 encodes a predicted cytosolic isocitrate dehydrogenase; by homology, IDH-1 is predicted to catalyze the formation of alpha-ketoglutarate from isocitrate.	16.4	Y			ENSG00000182054	IDH2	Isocitrate dehydrogenase NADP-dependent
WBGene00013514	Y73F4A.1	none available	16.32				n/a	n/a	n/a
WBGene00011383	T02E9.5	none available	16.3	Y			n/a	n/a	n/a
WBGene00001241	elo-3	The elo-3 gene encodes a paralog of elo-1 and elo-2, each of which encodes a polyunsaturated fatty acid (PUFA) elongase; ELO-3 may be required for normally rapid growth.	16.27	Y			ENSG00000119915	ELOVL3	ELO family
WBGene00012664	Y39B6A.1	none available	16.25	Y	Y		ENSG00000197915	HRNR	n/a
WBGene00022745	ZK470.2	none available	16.24	Y		Y	n/a	n/a	n/a
WBGene00011668	clec-47	clec-47 encodes a C-type lectin; clec-47 expression is upregulated in response to stressors including ionizing radiation and bacterial infection.	16.15			Y	n/a	n/a	n/a
WBGene00018138	folt-2	folt-2 encodes a putative folate transporter; FOLT-2 is orthologous to the human folate transporters SLC19A1, SLC19A2, and SLC19A3 (Solute Carrier Family 19 (thiamine transporter), Member 1, 2 or 3); heterologously expressed FOLT-2 does not significantly transport folate; FOLT-2 does not seem to have any obvious function, perhaps because of genetic redundancy with its paralogs, FOLT-1 and FOLT-3.	16.15			Y	ENSG00000173638	SLC19A1	Reduced folate carrier
WBGene00004905	snf-6	snf-6 encodes a member of the sodium:neurotransmitter symporter family.	16.13	Y			ENSG00000196517	SLC6A9	Sodium:neurotransmitter symporter
WBGene00020195	T03G6.3	T03G6.3 encodes a protein homologous to human ENPP6 (nucleotide pyrophosphatase/phosphodiesterase 6); T03G6.3 fusion proteins are expressed in body wall and vulval muscles and localize dynamically to the I-bands of bodywall muscle sarcomeres; T03G6.3 activity is required for wild-type levels of PGL-1::GFP in P granules of F1 embryos.	16.1				ENSG00000182156	ENPP7	Type I phosphodiesterase/nucleotide pyrophosphatase/phosphate transferase
WBGene00013463	Y67H2A.5	Y67H2A.5 encodes a KASH domain (klarsicht, ANC-1 and Syne) protein; vertebrate KASH domain proteins include SYNE1 and SYNE2; most KASH domain proteins do not share primary sequence homology outside of their KASH domain; Y67H2A.5 is required for meiotic progression in the gonad and normal cell cycle progression in the early embryo; knock-down of Y67H2A.5 results in embryonic and larval lethalities…	16.1	Y			n/a	n/a	n/a
WBGene00017062	glrx-3	none available	16.09			Y	ENSG00000108010	GLRX3	Glutaredoxin
WBGene00017734	F23C8.5	The F23C8.5 gene encodes an ortholog of the human gene ELECTRON TRANSFER FLAVOPROTEIN BETA SUBUNIT (ETFB), which when mutated leads to glutaricaciduria type IIB (OMIM:130410).	16.06				ENSG00000105379	ETFB	Electron transfer flavoprotein, beta subunit
WBGene00006699	uba-1	uba-1 encodes the only known ubiquitin-activating enzyme in C. elegans and is orthologous to Saccharomyces cerevisiae UBA1 and human UBE1; UBA-1 is essential for embryogenesis and larval development and is required for proper formation of the male tail, sperm fertility, proper body size, meiotic progression in the embryo and germline development; by homology, UBA-1 is predicted to function in an …	16.06	Y			ENSG00000182179	UBA7	Ubiquitin/SUMO-activating enzyme E1
WBGene00019203	ttr-47	none available	16.02	Y			n/a	n/a	n/a
WBGene00013867	ZC373.2	none available	16.02			Y	n/a	n/a	n/a
WBGene00021934	cct-8	cct-8 encodes a putative theta subunit of the eukaryotic cytosolic ("T complex") chaperonin, orthologous to human CCT8, ENSG00000020219, and CCT8L2/KCNMB3L; in mass RNAi assays, CCT-8 is required for transgene repression, distal tip cell migration, embryonic and larval viability, fertility, normal body coloration, locomotion, and vulval development, and normally rapid growth.	15.99				ENSG00000198445	CCT8L2	Chaperonin Cpn60/TCP-1 family
WBGene00006921	vha-12	vha-12 encodes an ortholog of subunit B of the cytoplasmic (V1) domain of vacuolar proton-translocating ATPase (V-ATPase); VHA-12 is orthologous to human ATP6V1B1 (OMIM:192132, mutated in distal renal tubular acidosis with progressive sensorineural deafness) and ATP6V1B2 (OMIM:606939); VHA-12 and TAG-300/Y110A7A.12 are co-orthologs; VHA-17, like VHA-1 and VHA-12, antagonizes EFF-1-mediated cell f…	15.99	Y			ENSG00000147416	ATP6V1B2	ATPase, F1/V1/A1 complex, alpha/beta subunit, nucleotide-binding domain
WBGene00022037	acs-13	none available	15.96	Y			ENSG00000123983	ACSL3	AMP-dependent synthetase/ligase
WBGene00000985	dhs-22	dhs-22 encodes a short-chain dehydrogenase predicted to be mitochondrial.	15.95				ENSG00000278284	RDH13	Short-chain dehydrogenase/reductase SDR
WBGene00003922	pas-1	pas-1 encodes a type 6 alpha subunit of the 26S proteasome"s 20S protease core particle (CP); PAS-1 is required for embryonic development and by homology, is predicted to comprise the outer rings of the proteasome and to play a role in selective degradation of ubiquitinated proteins during development; in vitro, PAS-1 interacts with VET-1, a coiled-coil domain-containing protein expressed in the …	15.95		Y		ENSG00000100902	PSMA6	Proteasome alpha-subunit, N-terminal domain
WBGene00014108	ZK856.7	none available	15.95		Y		n/a	n/a	n/a
WBGene00020930	hlh-30	hlh-30 encodes a predicted basic helix-loop-helix (bHLH) transcription factor, one of 42 such genes in the C. elegans genome, it is spliced to give 18 different transcripts; it is orthologous to human microphthalmia-associated transcription factor (HGNC:MITF); loss of hlh-30 activity via RNAi results in reduced fat storage; HLH-30 demonstrates sequence-specific DNA binding for the E box sequence …	15.84	Y		Y	ENSG00000187098	MITF	Myc-type, basic helix-loop-helix (bHLH) domain
WBGene00014088	ZK809.8	none available	15.8	Y			n/a	n/a	n/a
WBGene00235269	F59E12.15	none available	15.79	Y			n/a	n/a	n/a
WBGene00019122	F59E12.6	none available	15.79	Y			n/a	n/a	n/a
WBGene00000967	dhs-3	dhs-3 encodes a member of the short-chain dehydrogenases/reductases family (SDR) predicted to be mitochondrial.	15.78	Y			ENSG00000170786	SDR16C5	Short-chain dehydrogenase/reductase SDR
WBGene00021043	pck-1	pck-1 is one of three C. elegans genes that encode proteins with similarity to phosphoenolpyruvate carboxykinase (PEPCK); by similarity, the products of W05G11.6 are predicted to function in gluconeogenesis.	15.77				ENSG00000124253	PCK1	Phosphoenolpyruvate carboxykinase, GTP-utilising
WBGene00015687	chdp-1	none available	15.7	Y		Y	n/a	n/a	n/a
WBGene00008741	F13D12.6	F13D12.6 is orthologous to the human gene SIMILAR TO PROTECTIVE PROTEIN FOR BETA-GALACTOSIDASE (GALACTOSIALIDOSIS) (PPGB; OMIM:256540), which when mutated leads to disease.	15.68				ENSG00000106066	CPVL	Peptidase S10, serine carboxypeptidase
WBGene00007907	C34B4.2	none available	15.67	Y			n/a	n/a	n/a
WBGene00007909	C34B4.4	none available	15.67	Y		Y	n/a	n/a	n/a
WBGene00008377	D1054.10	none available	15.65	Y			n/a	n/a	n/a
WBGene00001173	egl-4	egl-4 encodes a cyclic GMP-dependent protein kinase that may act through the TGF-beta signaling pathway to relay sensory cues that modulate chemosensory behavior, dauer formation, foraging, egg laying, body size, and endoreduplication in response to dietary restriction; egl-4 is also required for lethargus, a sleep-like state that is induced before each of the four larval molts; in addition, gene…	15.6	Y		Y	ENSG00000138669	PRKG2	Cyclic nucleotide-binding domain
WBGene00008378	D1054.11	none available	15.59	Y			n/a	n/a	n/a
WBGene00006780	unc-44	The unc-44 gene encodes an ankyrin-like protein required for proper sex myoblast and axonal guidance during development.	15.59	Y	Y		ENSG00000205277	MUC12	Death domain
WBGene00004888	smo-1	smo-1 encodes the C. elegans ortholog of SUMO, a small ubiquitin-like moiety that, when attached to protein substrates, regulates their subcellular localization and activity; smo-1 is an essential gene: loss of its activity results in embryonic and larval lethality; in addition, smo-1 mutants have defects in synaptonemal complex disassembly and bivalent formation, enhance meiotic defects of zhp-3…	15.57				ENSG00000228532	n/a	Ubiquitin domain
WBGene00019160	H05L03.3	none available	15.55	Y			n/a	n/a	n/a
WBGene00001745	gsa-1	The gsa-1 gene encodes a Gs alpha subunit of heterotrimeric G proteins which affects L1 larval stage viability, movement, and egg laying; it is genetically upstream of sgs-1 with respect to neuronal degeneration, as defined by gain-of-function analysis, and is expressed in excitable cells.	15.48	Y		Y	ENSG00000141404	GNAL	G-protein alpha subunit, group S
WBGene00003053	lmp-1	lmp-1 encodes a protein with similarity to vertebrate lysosome-associated membrane proteins CD68, and appears to be the only protein in C. elegans that has a GYXX (phi) vertebrate lysosomal targeting sequence at its carboxy terminus; LMP-1 is widely expressed in the early embryo, with later expression seen in the intestine, coelomocytes, and neurons; LMP-1 localizes to lysosomes and is recruited …	15.48	Y		Y	n/a	n/a	n/a
WBGene00021597	spsb-1	none available	15.47	Y			ENSG00000111671	SPSB2	SOCS box domain
WBGene00009881	F49C12.12	none available	15.45	Y		Y	ENSG00000219200	RNASEK	Ribonuclease kappa
WBGene00017671	pgal-1	none available	15.44				ENSG00000145730	PAM	Peptidylglycine alpha-hydroxylating monooxygenase/peptidyl-hydroxyglycine alpha-amidating lyase
WBGene00021089	W08E12.8	none available	15.43			Y	n/a	n/a	n/a
WBGene00000277	cab-1	Novel protein which has a C-terminal motif weakly homologous to mouse NPDC-1 and is involved in synaptic regulation; it is expressed in various neurons including ventral cord and tail ganglion neurons; it physically interacts with AEX-3, which is a guanine nucleotide exchange factor for the Rab3 GTPase.	15.41	Y			ENSG00000107281	NPDC1	Neural proliferation differentiation control-1
WBGene00002025	hsp-60	hsp-60 encodes a nuclear-encoded mitochondrion-specific chaperone that is a member of the GroE/Hsp10/60 superfamily of molecular chaperones; hsp-60 is involved in the mitochondrial unfolded protein response, as hsp-60 expression, normally broadly detected during development, is greatly increased in response to treatments that disrupt mitochondrial protein handling; loss of hsp-60 activity via RNA…	15.41	Y			ENSG00000144381	HSPD1	Chaperonin Cpn60
WBGene00016913	lam-2	lam-2 encodes a laminin gamma subunit; lam-2 activity is required for embryonic development and for regulation of muscle arm extension; loss of lam-2 function via large-scale RNAi screens results in embryonic, larval, and adult lethality, sterility, body morphology defects, and abnormal locomotion.	15.4	Y			ENSG00000196569	LAMA2	Laminin IV
WBGene00009177	F26H9.5	none available	15.37				ENSG00000135069	PSAT1	Aminotransferase class V domain
WBGene00007463	vgln-1	none available	15.36	Y			ENSG00000115677	HDLBP	K Homology domain
WBGene00016977	akap-1	none available	15.33	Y			ENSG00000121057	AKAP1	Tudor domain
WBGene00000780	cpn-4	cpn-4 encodes a calponin homolog, most closely related to its paralog CPN-3 in C. elegans; CPN-4 is somewhat more similar to calponins per se (such as CLP1 and CLP2 in humans) than to the to the calponin paralogs transgelin (SM22 alpha) or neuronal protein NP25.	15.33	Y			ENSG00000158710	TAGLN2	Calponin homology domain
WBGene00022679	ZK180.5	none available	15.33	Y			n/a	n/a	n/a
WBGene00016509	adss-1	none available	15.3	Y		Y	ENSG00000035687	ADSS	Adenylosuccinate synthetase
WBGene00019842	R02F11.4	none available	15.3	Y			ENSG00000182504	CEP97	Leucine rich repeat 4
WBGene00012907	cpt-1	Y46G5A.17 is orthologous to the human gene SIMILAR TO CARNITINE PALMITOYLTRANSFERASE I, LIVER (CPT1A; OMIM:600528), which when mutated leads to disease.	15.25	Y			ENSG00000205560	CPT1B	Acyltransferase ChoActase/COT/CPT
WBGene00003082	lsm-8	none available	15.25	Y			ENSG00000128534	LSM8	LSM domain, eukaryotic/archaea-type
WBGene00004783	seu-1	seu-1 encodes three unfamiliar nuclear proteins by alternative splicing, at least two of which are required for completely normal signalling by UNC-6/netrin and its UNC-5 receptor; SEU-1 is also required for fully normal locomotion, body size and dauer formation; seu-1 mutations strongly suppress the misorientation of touch cell growth cones by ectopically expressed UNC-5, which otherwise would d…	15.25	Y			ENSG00000130528	HRC	n/a
WBGene00022361	Y92H12A.5	none available	15.24	Y			ENSG00000115970	THADA	Armadillo-like helical
WBGene00009992	F53F4.10	F53F4.10 is orthologous to the human gene NADH-ubiquinone oxidoreductase flavoprotein 2 (NDUFV2; complex I of the respiratory chain); F53F4.10 protein is predicted to be mitochondrial.	15.22			Y	ENSG00000178127	NDUFV2	NADH-quinone oxidoreductase subunit E-like
WBGene00009993	F53F4.11	none available	15.22				ENSG00000171490	RSL1D1	Ribosomal protein L1, 2-layer alpha/beta-sandwich
WBGene00010424	H36L18.2	none available	15.22	Y			n/a	n/a	n/a
WBGene00010681	mak-1	none available	15.17	Y	Y	Y	ENSG00000162889	MAPKAPK2	Protein kinase domain
WBGene00017299	molo-1	none available	15.15				n/a	n/a	n/a
WBGene00013260	rsr-2	none available	15.15				ENSG00000177679	SRRM3	mRNA splicing factor Cwf21 domain
WBGene00021630	Y47D9A.3	none available	15.15				n/a	n/a	n/a
WBGene00013859	ZC247.1	none available	15.15	Y		Y	ENSG00000277518	MUC6	n/a
WBGene00012875	Y45F10B.13	none available	15.12		Y		n/a	n/a	n/a
WBGene00010982	flp-32	none available	15.09				n/a	n/a	n/a
WBGene00003901	paa-1	paa-1 encodes the sole C. elegans homolog of PR65, the structural subunit of protein phosphatase 2A (PP2A); paa-1 is an essential gene, required in RNAi assays for embryonic viability, fertility, and cuticular integrity; PAA-1 protein physically interacts with LET-92, the PP2A catalytic subunit, and with RSA-1, a PP2A regulatory subunit; PAA-1 also physically interacts with SMG-5; PAA-1 localizes…	15.09				ENSG00000137713	PPP2R1B	HEAT repeat
WBGene00019209	emc-1	none available	15.08				ENSG00000127463	EMC1	Six-bladed beta-propeller, TolB-like
WBGene00007696	tram-1	tram-1 encodes the C. elegans ortholog of translocating chain-associated membrane protein 1; by homology, TRAM-1 is predicted to function in translocation of protein across the endoplasmic reticulum membrane; TRAM-1 localizes to the rough endoplasmic reticulum (ER) as well as to post-ER compartments such as the ciliary base.	15.08	Y			ENSG00000174599	TRAM1L1	TRAM/LAG1/CLN8 homology domain
WBGene00002191	kin-3	kin-3 encodes an ortholog of the catalytic subunit of casein kinase II alpha, which in Drosophila and mammals is required for normal circadian rhythms, and which directly phosphorylates the Drosophila PERIOD protein (which itself regulates circadian rhythms); by analogy, KIN-3 might be expected to help regulate heterochronic functions dependent on such proteins as LIN-42.	15.07	Y			ENSG00000254598	CSNK2A3	Protein kinase domain
WBGene00016378	imp-3	none available	15.06				n/a	n/a	n/a
WBGene00006634	tsp-8	tsp-8 is orthologous to the human gene KANGAI 1 (SUPPRESSION OF TUMORIGENICITY 6, PROSTATE; CD82 ANTIGEN (R2 LEUKOCYTE ANTIGEN, ANTIGEN DETECTED BY MONOCLONAL AND ANTIBODY IA4)) (KAI1; OMIM:600623), which when mutated leads to disease.	15.06		Y		ENSG00000250349	n/a	Tetraspanin
WBGene00000552	cmd-1	cmd-1 encodes a putative homolog of calmodulin 1 that affects growth rate and fertility.	15.05	Y		Y	ENSG00000178363	CALML3	EF-hand domain
WBGene00003022	lin-37	none available	15.05				n/a	n/a	n/a
WBGene00010408	mboa-2	mboa-2 encodes a sterol O-acyltransferase orthologous to Drosophila MIDWAY, and to human DGAT1 (OMIM:604900); MBOA-2 has acyl-CoA:diacylglycerol O-acyltransferase activity when expressed in yeast; MBOA-2 has no obvious function in mass RNAi assays.	15.05	Y		Y	ENSG00000185000	DGAT1	Membrane bound O-acyl transferase, MBOAT
WBGene00006528	tba-1	tba-1 encodes one of nine C. elegans alpha-tubulins; in early embryos, tba-1 is required, partially redundantly with the closely related tba-2, for a number of microtubule-dependent processes and hence, for normal embryonic development; wild-type tba-1 activity is also required for cell migrations as well as motor neuron synapse and axon development; tba-1 is transcribed during oogenesis and wide…	15.05	Y			ENSG00000214391	n/a	Tubulin
WBGene00001240	elo-2	elo-2 encodes a palmitic acid elongase, homologous to polyunsaturated fatty acid (PUFA) elongases such as ELO-1, that is required for normally rapid growth, normally large body size, fertility, and for the quantitative regulation of the ultradian defecation rhythm; the joint action of ELO-2 with ELO-1 is strongly required for 20-carbon PUFA production and for general viability; loss of el-2 activ…	15	Y		Y	ENSG00000170522	ELOVL6	ELO family
WBGene00017727	F22H10.3	none available	14.99	Y			n/a	n/a	n/a
WBGene00016474	C36C5.5	none available	14.98				n/a	n/a	n/a
WBGene00003812	nrf-5	nrf-5 encodes a lipid-binding protein that is related to mammalian cholesterol-ester-binding proteins; nrf-5 was identified in screens for genes that confer resistance to the action of fluoxetine, and appears to play a role in transporting hydrophobic molecules from the intestine to other tissues; NRF-5 also functions with CED-7 and TTR-52 to mediate phosphatidylserine transfer from apoptotic cel…	14.97		Y		n/a	n/a	n/a
WBGene00004245	puf-9	The puf-9 gene encodes a predicted RNA binding protein orthologous to Drosophila PUMILIO and human PUMILIO 2 (OMIM:607205); PUF-9 is required for normal locomotion and fluid balance, and is expressed primarily in somatic tissues; PUF-9 contains a glutamine/asparagine-rich domain.	14.97	Y			ENSG00000134644	PUM1	Pumilio RNA-binding repeat
WBGene00000615	col-38	col-38 encodes a member of the collagen superfamily containing collagen triple helix repeats (20 copies) required for normal body morphology.	14.96	Y		Y	ENSG00000133661	SFTPD	Nematode cuticle collagen, N-terminal
WBGene00004173	pqn-94	The protein product of this gene is predicted to contain a glutamine/asparagine (Q/N)-rich ("prion") domain, by the algorithm of Michelitsch and Weissman (as of the WS77 release of WormBase, i.e., in wormpep77).	14.96				n/a	n/a	n/a
WBGene00007196	B0513.4	none available	14.95	Y		Y	n/a	n/a	n/a
WBGene00010266	dct-18	none available	14.95				n/a	n/a	n/a
WBGene00015472	C05D9.3	none available	14.93		Y		ENSG00000132470	ITGB4	Integrin beta subunit, N-terminal
WBGene00022820	ZK813.1	none available	14.92				n/a	n/a	n/a
WBGene00016785	C49G7.7	none available	14.91				n/a	n/a	n/a
WBGene00008446	E01G4.3	none available	14.87	Y	Y		n/a	n/a	n/a
WBGene00013732	aakg-1	aakg-1 is orthologous to the human gene AMP-ACTIVATED PROTEIN KINASE GAMMA SUBUNIT (PRKAG2; OMIM:602743), which when mutated leads to disease; aakg-1 encodes one of five C. elegans AMP kinase (AMPK) gamma regulatory subunits.	14.86				ENSG00000115592	PRKAG3	CBS domain
WBGene00019682	K12H4.7	none available	14.86			Y	ENSG00000112812	PRSS16	Peptidase S28
WBGene00022144	pghm-1	none available	14.85	Y			n/a	n/a	n/a
WBGene00016838	C50F2.4	none available	14.8	Y	Y		n/a	n/a	n/a
WBGene00001000	dim-1	dim-1 encodes novel proteins containing three immunoglobulin-like repeats in the carboxy terminus; dim-1 was originally identified in screens for mutations that suppress locomotion defects caused by aberrant muscle assembly in animals carrying a missense mutation in unc-112, which encodes a pleckstrin homology domain-containing protein required for the early stages of muscle assembly; loss-of-fun…	14.79	Y	Y		n/a	n/a	n/a
WBGene00021845	rpb-7	none available	14.79				ENSG00000168002	POLR2G	S1 domain
WBGene00011348	T01H3.2	T01H3.2 encodes a large (980-residue) uncharacterized protein, with multiple dysferlin and beta-propeller domains, that is conserved among metazoa; T01H3.2 shares an operon with vha-4, and thus might be a previously undescribed V-ATPase component or ancillary protein.	14.79				ENSG00000205356	TECPR1	Peroxin/Ferlin domain
WBGene00000472	cey-1	cey-1 encodes a protein with a cold-shock/Y-box domain that is expressed in early embryonic blastomeres (at the 15-cell stage, i.e., pre-gastrulation), but is normally repressed in early germline blastomeres by PIE-1.	14.78	Y			ENSG00000231167	n/a	Cold-shock protein, DNA-binding
WBGene00017881	asp-13	none available	14.77				ENSG00000256713	PGA5	Aspartic peptidase A1 family
WBGene00003568	ncx-3	ncx-3 encodes a putative 3Na[+]/1Ca[2+] exchanger, orthologous to human SLC8A1-3 and paralogous to NCX-1/-2; NCX-3 is predicted to export free cytoplasmic Ca[2+] with low affinity but high capacity, being complemented by low-capacity/high-affinity Ca[2+] ATPase pumps such as MCA-1/-3; NCX-3 has tandem Calx-alpha and Calx-beta domains predicted to carry out ion transport and regulation; NCX-3 has …	14.72				ENSG00000183023	SLC8A1	Na-Ca exchanger/integrin-beta4
WBGene00009583	aagr-3	none available	14.7				ENSG00000214013	GANC	Glycoside hydrolase family 31
WBGene00010048	F54D5.2	none available	14.7				n/a	n/a	n/a
WBGene00019332	K02F3.9	none available	14.6				n/a	n/a	n/a
WBGene00003567	ncx-2	ncx-2 encodes, by alternative splicing, three full-length isoforms of a putative 3Na[+]/1Ca[2+] exchanger, orthologous to human SLC8A1-3 and paralogous to NCX-1 and NCX-3; NCX-2 is predicted to export free cytoplasmic Ca[2+] with low affinity but high capacity, being complemented by low-capacity/high-affinity Ca[2+] ATPase pumps such as MCA-1/-3; NCX-3 has tandem Calx-alpha and Calx-beta domains …	14.59	Y	Y		ENSG00000164199	ADGRV1	Na-Ca exchanger/integrin-beta4
WBGene00006876	vab-10	vab-10 encodes, by alternative splicing, two spectraplakins (VAB-10A and VAB-10B) that are jointly required for mechanical resilience of the epidermis under strain by the contraction of actin microfilaments mechanically linked to fibrous organelles (FOs); VAB-10A/B are, accordingly, required for elongation during embryonic morphogenesis; VAB-10A has C-terminal plectin repeats while VAB-10B has sp…	14.58	Y			ENSG00000261150	EPPK1	Plectin repeat
WBGene00004249	pvf-1	pvf-1 encodes a protein related to the VEGF family of growth factors; in C. elegans, PVF-1 functions in the male tail to regulate the position of the ray 1 sensillum via inhibition of UNC-40/DCC netrin signaling through the CED-10 GTPase; PVF-1 can bind the human VEGF receptors VEGFR1 (FLT) and VEGFR2 (KDR) and when expressed in chick embryos and human umbilical vein endothelial cells induces ang…	14.55		Y		ENSG00000197461	PDGFA	PDGF/VEGF domain
WBGene00003150	mbk-2	mbk-2 encodes one of two C. elegans members of the DYRK (dual-specificity Yak1-related kinase) family of proteins that includes S. cerevisiae Yak1 and the Drosophila minibrain and DYRK2 kinases; MBK-2 activity is required maternally for the oocyte-to-egg transition that occurs during the earliest stages of embryonic development; specifically, MBK-2 is required for: 1) posterior localization of th…	14.53	Y			ENSG00000010219	DYRK4	Protein kinase domain
WBGene00000730	col-157	none available	14.52				ENSG00000019169	MARCO	Nematode cuticle collagen, N-terminal
WBGene00009880	F49C12.11	none available	14.51	Y			ENSG00000232112	TMA7	Translation machinery associated TMA7
WBGene00004463	rpn-7	rpn-7 is predicted to encode a non-ATPase subunit of the 19S regulatory complex of the proteasome that affects fertility and embryonic viability.	14.51	Y	Y		ENSG00000163636	PSMD6	Proteasome component (PCI) domain
WBGene00009118	F25H2.4	none available	14.5			Y	ENSG00000131148	EMC8	Uncharacterised protein family UPF0172
WBGene00001971	hmg-1.1	hmg-1.1 encodes a member of the high mobility group (HMG) family of proteins.	14.5	Y			ENSG00000189403	HMGB1	High mobility group box domain
WBGene00010351	cbd-1	cbd-1 encodes a large (1319-residue) protein with 12 chitin-binding peritrophin-A domains; cbd-1(RNAi) animals have an osmotically-sensitive embryonic lethal phenotype, perhaps because of defects in chitin and eggshell synthesis; like CEJ-1 and CPG-2, CBD-1 may participate in eggshell synthesis and early embryonic development; CBD-1"s multiple peritrophin-A domains might enable mechanical cross-l…	14.49	Y			n/a	n/a	n/a
WBGene00012608	Y38F1A.6	none available	14.48			Y	ENSG00000147576	ADHFE1	Alcohol dehydrogenase, iron-type
WBGene00020588	T19H12.2	none available	14.46	Y			ENSG00000139223	ANP32D	Leucine-rich repeat domain, L domain-like
WBGene00017719	ldp-1	none available	14.42				ENSG00000143653	SCCPDH	Saccharopine dehydrogenase, NADP binding domain
WBGene00044070	set-18	set-18 encodes, by alternative splicing, two isoforms of a divergent ortholog of human SMYD1 (OMIM:606846), SMYD2 (OMIM:610663), and SYMD3 (OMIM:608783); SET-18 is paralogous to SET-10, SET-14, and SET-30.	14.39				ENSG00000143499	SMYD2	Zinc finger, MYND-type
WBGene00018145	F37C4.5	none available	14.36	Y			n/a	n/a	n/a
WBGene00009096	fipr-1	none available	14.35	Y		Y	n/a	n/a	n/a
WBGene00000198	art-1	a protein similar to synaptic glycoprotein SC2 from mammals.	14.34	Y			ENSG00000205678	TECRL	Ubiquitin domain
WBGene00001038	dnj-20	none available	14.34	Y			ENSG00000283149	n/a	DnaJ domain
WBGene00007058	dmd-6	none available	14.3	Y			n/a	n/a	n/a
WBGene00000207	asb-2	asb-2 encodes the B subunit of the membrane-bound F0 proton channel portion of ATP synthase (mitochondrial respiratory chain [MRC] complex V) that is closely similar to its paralog ASB-1; RNAi experiments indicate that asb-2 activity is required for larval development as well as for normal body morphology, lifespan, and growth rate.	14.29	Y	Y	Y	ENSG00000116459	ATP5F1	ATPase, F0 complex, B chain/subunit B/MI25
WBGene00008149	pyp-1	pyp-1 encodes, by alternative splicing, three isoforms of an inorganic pyrophosphatase required for embryonic and larval viability, intestinal function, and distal tip cell migration; PYP-1 is catalytically active in vitro, and is expressed in neurons, intestine, and coelomocytes; PYP-1 is orthologous to Drosophila NURF-38, and to human PPA1 (OMIM:179030) and PPA2; by orthology with NURF-38, PYP-…	14.26			Y	ENSG00000138777	PPA2	Inorganic pyrophosphatase
WBGene00020317	pdf-1	none available	14.24	Y		Y	n/a	n/a	n/a
WBGene00011155	R09B3.2	none available	14.24			Y	ENSG00000102317	RBM3	RNA recognition motif domain
WBGene00010178	yif-1	none available	14.23	Y			ENSG00000167645	YIF1B	Yif1 family
WBGene00019162	eif-1.A	eif-1.A encodes a homolog of eukaryotic translation initiation factor 1A; eif-1.A is widely expressed and, by homology, is predicted to function in translation initiation.	14.19				ENSG00000173674	EIF1AX	Translation initiation factor 1A (eIF-1A)
WBGene00001047	dnj-29	This gene encodes a protein containing a DnaJ ("J") domain.	14.18				ENSG00000025796	SEC63	C2 domain
WBGene00001561	gei-4	gei-4 encodes a protein with a coiled-coil domain (predicted to mediate protein-protein interactions), an internal repeat of 69 residues (covering residues 134-202, 203-265, and 266-328 of W07B3.2a), and a glutamine/asparagine-rich domain; GEI-4 is paralogous to Y50D7A.8 and Y59C2A.3, physically interacts with GEX-2, and is required for embryonic viability, fertility, and vulval morphogenesis; GE…	14.18	Y			n/a	n/a	n/a
WBGene00004208	ptc-1	ptc-1 encodes an ortholog of Drosophila PATCHED (PTC) and human PTCH which defines one of seven paralogous families of sterol sensing domain (SSD) proteins; PTC-1 is required for cytokinesis in the germline, but not in somatic cells (the converse of PTR-2"s function, and a role conserved in C. briggsae); PTC-1 is also required to isolate meiotic germline nuclei from one another so that their nucl…	14.15	Y			ENSG00000117425	PTCH2	Protein patched/dispatched
WBGene00014090	ZK822.2	none available	14.13	Y	Y		n/a	n/a	n/a
WBGene00000814	csn-2	csn-2 encodes a homolog of COP9 signalosome complex subunit 2 that affects embryonic viability and growth rate.	14.12	Y			ENSG00000166200	COPS2	Proteasome component (PCI) domain
WBGene00012557	Y37D8A.19	none available	14.11	Y		Y	n/a	n/a	n/a
WBGene00020158	T02C5.1	The T02C5.1 gene encodes a protein that may be involved in apoptosis; it has some similarity to the tumor necrosis factor (TNF) receptor of vertebrates.	14.09				n/a	n/a	n/a
WBGene00013037	Y49E10.18	none available	14.08	Y			n/a	n/a	n/a
WBGene00019170	H06I04.6	none available	14.07			Y	n/a	n/a	n/a
WBGene00007261	lron-3	none available	14.07				ENSG00000283085	TPBG	Cysteine-rich flanking region, C-terminal
WBGene00004113	pqn-24	The protein product of this gene is predicted to contain a glutamine/asparagine (Q/N)-rich ("prion") domain, by the algorithm of Michelitsch and Weissman (as of the WS77 release of WormBase, i.e., in wormpep77).	14.03		Y	Y	n/a	n/a	n/a
WBGene00010988	metr-1	metr-1 encodes a protein orthologous to the human gene Methionine synthase (MTR), which is involved in the conversion of homocysteine to form methionine.	14.01				ENSG00000116984	MTR	Pterin-binding domain
WBGene00017675	F21F3.6	none available	13.98	Y			n/a	n/a	n/a
WBGene00011110	prdx-3	prdx-3 encodes one of two C. elegans typical 2-Cys peroxiredoxins, peroxidase enzymes that reduce hydrogen peroxide and contribute to the oxidative-stress response of multicellular organisms.	13.98				ENSG00000117592	PRDX6	Alkyl hydroperoxide reductase subunit C/ Thiol specific antioxidant
WBGene00006984	zig-7	zig-7 encodes a predicted secreted protein that is a member of the immunoglobulin superfamily of proteins; loss of zig-7 activity via RNAi has been reported to result in aldicarb resistance; a zig-7::gfp reporter fusion is expressed in body wall muscle.	13.97		Y		n/a	n/a	n/a
WBGene00001404	fbp-1	fbp-1 encodes fructose 1,6-bisphosphatase, a gluconeogenic enzyme that catalyzes the hydrolysis of fructose 1,6-bisphosphate to fructose 6-phosphate and inorganic phosphate in a reaction that reverses the third enzymatic step of glycolysis; FBP-1 is orthologous to human FBP1 (OMIM:229700, mutated in FBP deficiency).	13.95		Y		ENSG00000165140	FBP1	Fructose-1,6-bisphosphatase class 1
WBGene00004062	pmp-5	none available	13.94				ENSG00000119688	ABCD4	ABC transporter-like
WBGene00020481	T13C2.6	none available	13.92	Y			ENSG00000157193	LRP8	LDLR class B repeat
WBGene00013735	Y111B2A.12	none available	13.92	Y			ENSG00000127837	AAMP	WD40 repeat
WBGene00010416	hxk-2	hxk-2 encodes one of three C. elegans hexokinases; in one large-scale RNAi screen, loss of hxk-2 activity was reported to result in embryonic lethality and reduced brood size; a GFP fusion protein containing the first two exons of hxk-2 localizes to mitochondria.	13.91				ENSG00000160883	HK3	Hexokinase
WBGene00021248	Y22D7AL.10	none available	13.9	Y		Y	ENSG00000235930	n/a	GroES-like
WBGene00000041	aco-2	aco-2 encodes an aconitase homolog that is required for embryonic viability, fertility, locomotion, and vulval morphogenesis, and perhaps for normal lifespan.	13.89	Y	Y		ENSG00000136381	IREB2	Aconitase A/isopropylmalate dehydratase small subunit, swivel domain
WBGene00017301	F09F7.4	none available	13.89	Y		Y	ENSG00000198130	HIBCH	ClpP/crotonase-like domain
WBGene00008914	F17C11.2	none available	13.89	Y		Y	n/a	n/a	n/a
WBGene00017300	rpc-2	none available	13.89				ENSG00000047315	POLR2B	DNA-directed RNA polymerase, subunit 2, domain 6
WBGene00017765	gcst-1	gcst-1 is orthologous to the human gene GLYCINE CLEAVAGE SYSTEM T-PROTEIN (AMT; OMIM:238310), which when mutated leads to glycine encephalopathy.	13.86				ENSG00000145020	AMT	Glycine cleavage T-protein-like, N-terminal
WBGene00011063	cpg-3	cgp-3 encodes a putatively secreted protein with an N-terminal low-complexity domain containing 15 potential chondroitin attachment sites, and a C-terminal EGF-like region; cpg-3 mRNA is enriched in oogenesis, but CPG-3 has no obvious function in mass RNAi assays.	13.85	Y			n/a	n/a	n/a
WBGene00016652	got-2.1	none available	13.84			Y	ENSG00000120053	GOT1	Aspartate/other aminotransferase
WBGene00009353	sdhd-1	F33A8.5 is orthologous to the human gene SUCCINATE DEHYDROGENASE COMPLEX, SUBUNIT D, INTEGRAL MEMBRANE PROTEIN (SDHD; OMIM:602690), which when mutated leads to disease.	13.84	Y			ENSG00000255292	SDHD	Succinate dehydrogenase [ubiquinone] cytochrome b small subunit, CybS
WBGene00194925	K08D8.11	none available	13.83				n/a	n/a	n/a
WBGene00020823	T26A5.8	none available	13.82	Y		Y	ENSG00000148229	POLE3	Transcription factor CBF/NF-Y/archaeal histone domain
WBGene00010838	M03C11.1	none available	13.8				ENSG00000169302	STK32A	Protein kinase domain
WBGene00004915	snr-2	none available	13.8				ENSG00000125835	SNRPB	LSM domain, eukaryotic/archaea-type
WBGene00006365	syg-1	syg-1 encodes a novel transmembrane protein that is a member of the immunoglobulin superfamily of proteins; during larval development, SYG-1 activity is required cell autonomously within the HSNL neuron to specify proper synaptic specificity with its targets, such as vulval muscles and the VC neuron; in regulating synapse formation, SYG-1 acts as a receptor for a second immunoglobulin superfamily…	13.8		Y		ENSG00000149571	KIRREL3	Immunoglobulin subtype 2
WBGene00014086	ZK809.3	none available	13.75			Y	n/a	n/a	n/a
WBGene00018877	aman-1	aman-1 encodes an ortholog of human lysosomal mannosidase (MAN2B1; OMIM:609458, mutated in alpha-mannosidosis); AMAN-1 is predicted to help digest glycoproteins by removing mannose residues from their N-linked oligosaccharides; AMAN-1 has seven predicted N-glycosylation sites; AMAN-1 is biochemically active in vitro, has optimal activity at pH 4-4.5, and is unaffected by Co(II); however, AMAN-1 e…	13.72				ENSG00000269590	n/a	Glycoside hydrolase family 38, N-terminal domain
WBGene00003771	nlp-33	none available	13.7	Y			n/a	n/a	n/a
WBGene00022069	eel-1	eel-1 encodes a predicted Hect E3 ubiquitin ligase that contains multiple domains of similarity to the mammalian Mcl1 ubiquitin ligase Mule; eel-1 (enhancer of efl-1) was identified in a screen for modifiers of the transcription factor efl-1/E2F which is involved in the generation of SKN-1 protein asymmetry in the early embryo, a process essential for proper embryonic patterning; EEL-1 binds SKN-…	13.66	Y			ENSG00000086758	HUWE1	HECT domain
WBGene00012929	rsks-1	rsks-1 encodes a putative ribosomal protein S6 kinase (S6K) required additively with IFG-1 for normally high levels of protein synthesis, and for normally short lifespan; RSKS-1"s effect on lifespan is independent of DAF-16, ISP-1, and SIR-2.1, and does not correlate with juglone resistance, but does correlate with abnormally high resistance to starvation and (perhaps) thermotolerance; RSKS-1 is …	13.65	Y			ENSG00000118515	SGK1	Protein kinase domain
WBGene00011446	T04F8.8	none available	13.65	Y			n/a	n/a	n/a
WBGene00021506	Y41D4A.4	none available	13.63	Y			ENSG00000077147	TM9SF3	Nonaspanin (TM9SF)
WBGene00013597	gpi-1	gpi-1 encodes two isoforms of a putative glucose 6-phosphate isomerase orthologous to human GPI (OMIM:172400, mutated in chronic hemolytic anemia); gpi-1 is required both for embryonic viability and (paradoxically) for normally short lifespan; gpi-1 is expressed in neurons and intestine.	13.61	Y			ENSG00000105220	GPI	Phosphoglucose isomerase (PGI)
WBGene00006709	ubc-14	ubc-14 encodes an E2 ubiquitin-conjugating enzyme; by homology, UBC-14 is predicted to function in the covalent attachment of ubiquitin molecules to protein substrates, via its association with an E3 ubiquitin-protein ligase; loss of ubc-14 activity via RNAi results in embryonic lethality at a stage after gastrulation but prior to muscle twitching, and in abnormal larval tail morphology.	13.61			Y	ENSG00000132388	UBE2G1	Ubiquitin-conjugating enzyme E2
WBGene00009771	F46B6.6	none available	13.6			Y	ENSG00000085760	MTIF2	Small GTP-binding protein domain
WBGene00009772	ztf-7	none available	13.6	Y			ENSG00000198839	ZNF277	Zinc finger, C2H2-like
WBGene00000685	col-111	none available	13.57				ENSG00000240654	C1QTNF9	Nematode cuticle collagen, N-terminal
WBGene00000423	ced-9	ced-9 encodes the sole C. elegans homolog of the mammalian cell-death inhibitor Bcl-2; during development, ced-9 activity is essential for preventing cells from undergoing programmed cell death; ced-9 also appears to have proapoptotic activity; CED-9 functions by binding and repressing the activity of CED-4, a protein similar to human APAF-1 and positive regulator of CED-3 caspase activity; CED-9…	13.55				ENSG00000171552	BCL2L1	Apoptosis regulator, Bcl-2 protein, BH4
WBGene00003225	mev-1	mev-1 encodes the C. elegans ortholog of the succinate dehydrogenase cytochrome b560 subunit, an integral membrane protein that is a subunit of mitochondrial respiratory chain complex II (ubiquinol-cytochrome c reductase); MEV-1 is required for oxidative phosphorylation, and mev-1 mutations result abnormal energy metabolism and increased sensitivity to oxidative stress and pathogen infection; a m…	13.55		Y		ENSG00000143252	SDHC	Succinate dehydrogenase/Fumarate reductase, transmembrane subunit
WBGene00020131	gcy-28	gcy-28 encodes a membrane-bound guanylyl cyclase with an extracellular ligand binding domain, a transmembrane domain, and a guanylyl cyclase domain; GCY-28 regulates odor preferences in AWC sensory neurons; gcy-28 regulates the sensory integration in the nervous system and that function of gcy-28 at adulthood is sufficient for normal sensory integration; GCY-28 in AIA interneurons is important fo…	13.48	Y		Y	ENSG00000169418	NPR1	Adenylyl cyclase class-3/4/guanylyl cyclase
WBGene00002265	lec-2	lec-2 encodes a "tandem repeat" type galectin (beta-galactosyl-binding lectin) containing two, tandemly arranged carbohydrate recognition domains; by homology, LEC-2 may play roles in cell adhesion and aggregation, proliferation, or programmed cell death.	13.46	Y	Y		ENSG00000100285	NEFH	Galectin, carbohydrate recognition domain
WBGene00004788	sft-4	sft-4 encodes an integral membrane protein orthologous to Saccharomyces cerevisiae endoplasmic reticulum (ER)-to-Golgi cargo receptor Erv29p and mouse Surfeit-4 (Surf-4); by homology, SFT-4 is predicted to function as a cargo receptor that selectively transports proteins in COPII vesicles from the ER to the cis-Golgi; SFT-4 activity is required for larval development and for normal down regulatio…	13.44	Y			ENSG00000280951	SURF4	Surfeit locus 4
WBGene00001692	grd-3	grd-3 encodes a hedgehog-like protein, with an N-terminal signal sequence and a C-terminal Ground domain; GRD-3 is expressed in adult anterior and posterior seam cells, overlapping GRD-5 expression; GRD-3 is also strongly expressed upon infection with the gram-negative bacterium Serratia marcescens, indicating that GRD-3 may be part of C. elegans" innate immunity response; the Ground domain is pr…	13.43				n/a	n/a	n/a
WBGene00021227	mct-1	none available	13.43	Y			ENSG00000168679	SLC16A4	Major facilitator superfamily
WBGene00021562	nuo-5	nuo-5 is orthologous to human NADH-UBIQUINONE OXIDOREDUCTASE Fe-S PROTEIN 1 (NDUFS1; OMIM:157655), which when mutated leads to mitochondrial complex I deficiency.	13.42	Y		Y	ENSG00000283447	NDUFS1	2Fe-2S ferredoxin-type iron-sulfur binding domain
WBGene00016610	paqr-1	none available	13.42				ENSG00000006831	ADIPOR2	PAC motif
WBGene00021563	Y45G12B.2	none available	13.42				ENSG00000162300	ZFPL1	Zinc finger, RING-type
WBGene00001395	fat-3	fat-3 encodes a delta-6 fatty acid desaturase ("linoleoyl-CoA desaturase") containing an N-terminal cytochrome b5 domain that is orthologous to the vertebrate fatty acid desaturases (FADS); FAT-3 expressed in yeast uses linoleic and alpha-linolenic acid as substrates; FAT-3 is absolutely required in vivo for synthesis of delta-6 fatty acids, and also required for fully normal synthesis of C20 fat…	13.41	Y			ENSG00000221968	FADS3	Cytochrome b5-like heme/steroid binding domain
WBGene00018782	cct-3	cct-3 encodes a putative gamma subunit of the eukaryotic cytosolic ("T complex") chaperonin, orthologous to human CCT3 (OMIM:600114); in early embryos, CCT-3 is required for normally fast microtubule elongation; CCT-3 is also required to repress SKN-1-dependent transcription of gst-4; in mass RNAi assays, CCT-3 is required for normal embryonic and larval viability, and for fertility.	13.39				ENSG00000163468	CCT3	Chaperonin Cpn60/TCP-1 family
WBGene00018781	F54A3.2	none available	13.39				ENSG00000175216	CKAP5	Armadillo-like helical
WBGene00044109	K02E11.10	none available	13.39				n/a	n/a	n/a
WBGene00013225	Y56A3A.2	none available	13.39				ENSG00000012174	MBTPS2	Membrane-bound transcription factor site-2 protease
WBGene00000892	cyn-16	cyn-16 encodes a highly diverged member of the cyclophilin family; CYN-16 exhibits low levels of peptidyl-prolyl cis/trans isomerase activity in vitro that is insensitive to the presence of cyclosporin A; a cyn-16::gfp fusion protein is expressed in the intestine during larval and adult stages of development, with particularly strong expression seen in the anterior and posterior ends; in dauer la…	13.36				ENSG00000153015	CWC27	Cyclophilin-type peptidyl-prolyl cis-trans isomerase domain
WBGene00004988	spp-3	spp-3 encodes an antimicrobial peptide that belongs to the SPP-protein family, called caenopores, with structural similarity to saposin-like proteins (SAPLIPs), the amoebapores and the mammalian NK-lysin and granulysin; caenopores are part of the worm"s innate immune system and interact with and eliminate bacteria via membrane pore-forming activity; C. elegans has at least 33 putative SPP protein…	13.36	Y			n/a	n/a	n/a
WBGene00006601	tpi-1	tpi-1 encodes a putative triosephosphate isomerase orthologous to human TPI1 (OMIM:190450, mutated in TPI deficiency) and Drosophila WASTED AWAY; loss of tpi-1 activity via RNAi results in increased resistance to exogenous oxidants and shortening of natural adult lifespan, both presumably due to alterations in the redox state of cells.	13.36	Y	Y		ENSG00000111669	TPI1	Triosephosphate isomerase
WBGene00000006	aat-5	aat-5 encodes a predicted amino acid transporter catalytic subunit; unlike catalytic subunits in other organisms, however, AAT-5 does not contain the highly conserved cysteine residue known to facilitate covalent interaction with a glycoprotein subunit, suggesting that AAT-5 does not require this residue for heterodimer formation or alternatively, does not require the glycoprotein subunit for fun…	13.35				n/a	n/a	n/a
WBGene00000665	col-90	none available	13.31			Y	ENSG00000133661	SFTPD	Nematode cuticle collagen, N-terminal
WBGene00009920	abts-1	abts-1 encodes a sodium-driven chloride-bicarbonate transporter; when expressed in Xenopus oocytes, ABTS-1 exhibits robust chloride transport, as well as chloride/bicarbonate exchange activity; abts-1 responds to arsenite in the environment with an increase in mRNA levels and is required for protection against toxicity of arsenite; abts-1 is involved in cholinergic signaling as abts-1 mutant worm…	13.28	Y		Y	ENSG00000164889	SLC4A2	Bicarbonate transporter, eukaryotic
WBGene00000793	crh-1	crh-1 encodes a homolog of the cyclic AMP-response element binding protein (CREB); crh-1 is involved in the transcription of CRE-sequence dependant genes activated by a CaM kinase cascade; crh-1 is required in the bilateral thermosensory neuron AFD, for a memory-related behaviour and for response to tap (nonlocalized mechanosensory stimulation) and tap habituation; crh-1 appears to be ubiquitousl…	13.27	Y			ENSG00000267281	n/a	cAMP response element binding (CREB) protein
WBGene00016630	acer-1	none available	13.25	Y	Y		n/a	n/a	n/a
WBGene00012344	ola-1	none available	13.25	Y			ENSG00000138430	OLA1	Ribosome-binding ATPase YchF/Obg-like ATPase 1
WBGene00019488	K07D4.9	none available	13.21				n/a	n/a	n/a
WBGene00021348	moag-4	moag-4 encodes a small protein that is evolutionarily highly conserved, containing a 4F5 domain predicted to have a helix-loop-helix secondary structure, moag-4 is orthologous to human SERF1A and SERF2 (OMIM: 603011, 605054); MOAG-4 is a general regulator of protein aggregation and proteotoxicity but it does not act on all disease-associated aggregation-prone proteins; MOAG-4 and human SERF prote…	13.19	Y		Y	ENSG00000205572	SERF1B	Uncharacterised protein family SERF
WBGene00003564	ncs-2	none available	13.19	Y			ENSG00000138472	GUCA1C	EF-hand domain
WBGene00011056	R06B9.5	none available	13.19				n/a	n/a	n/a
WBGene00021347	rpb-10	Y37E3.3 encodes the C. elegans ortholog of the RNA polymerase II Rbp10 subunit; loss of Y37E3.3 activity via large-scale RNAi results in early embryonic lethality.	13.19	Y			ENSG00000177700	POLR2L	DNA-directed RNA polymerase, subunit N/Rpb10
WBGene00004732	sax-7	sax-7 encodes an ortholog of human L1CAM, and a paralog of lad-2; L1CAM is a member of the group of highly conserved transmembrane cell adhesion receptor molecules which belong to the immunuglobulin superfamily; SAX-7 is required for axon guidance, neurite outgrowth and maintenance of neuronal positioning through homophilic and heterophilic interactions; sax-7 also affects germline development, e…	13.19	Y			ENSG00000198910	L1CAM	Immunoglobulin subtype 2
WBGene00004076	pod-2	pod-2 encodes an acetyl-CoA carboxylase; by sequence similarity, POD-2 is predicted to catalyze the first step in de novo fatty acid biosynthesis; pod-2 is required for proper embryonic polarity and for osmotic protection of the eggshell; pod-2 activity is also required for molting.	13.18	Y			ENSG00000275176	ACACA	Carboxyl transferase
WBGene00010993	vha-20	none available	13.16	Y			ENSG00000182220	ATP6AP2	Renin receptor-like
WBGene00008604	F09B9.5	none available	13.15				ENSG00000122694	GLIPR2	Cysteine-rich secretory protein, allergen V5/Tpx-1-related
WBGene00011038	R05H5.3	none available	13.15				ENSG00000171773	NXNL1	Thioredoxin-like fold
WBGene00000638	col-62	none available	13.14				ENSG00000133661	SFTPD	Nematode cuticle collagen, N-terminal
WBGene00016235	C29H12.2	none available	13.11	Y		Y	ENSG00000213699	SLC35F6	Sugar phosphate transporter domain
WBGene00002202	kin-19	kin-19 encodes a serine/threonine kinase orthologous to Casein Kinase I (CKI); in the early embryo, kin-19 is a component of both the non-canonical Wnt signaling pathway that regulates endoderm formation in the early embryo as well as the Wnt spindle orientation pathway; during larval development, kin-19 functions in a non-canonical Wnt signaling pathway to control asymmetric division and fate sp…	13.11	Y		Y	ENSG00000213923	CSNK1E	Protein kinase domain
WBGene00018586	ubxn-3	ubxn-3 encodes one of six C. elegans UBX (ubiquitin regulatory X) domain-containing proteins.	13.09	Y			ENSG00000185104	FAF1	UBX domain
WBGene00000625	col-48	col-48 encodes a cuticle collagen.	13.07				ENSG00000019169	MARCO	Nematode cuticle collagen, N-terminal
WBGene00006819	unc-87	unc-87 encodes, through alternative splicing, two proteins that are required to maintain the structure of myofilaments in body wall muscle cells; UNC-87 proteins resemble the C-terminal repeat region of calponin but have no obvious orthologs outside of nematodes; in vitro, UNC-87 proteins exist as monomers in solution, associate with thin (F-actin) filaments but not with monomeric G-actin, and bu…	13.07	Y	Y	Y	n/a	n/a	n/a
WBGene00021837	Y54E10BL.1	none available	13.07				n/a	n/a	n/a
WBGene00011971	lron-9	none available	13.06	Y		Y	ENSG00000178772	CPN2	Leucine-rich repeat
WBGene00012140	T28F4.5	The T28F4.5 gene encodes a homolog of Death Associated Protein 1 (DAP-1) protein that may be involved in apoptosis.	13.04	Y			n/a	n/a	n/a
WBGene00077526	C25A1.16	none available	13.03	Y			n/a	n/a	n/a
WBGene00018990	klf-1	klf-1 encodes a C2H2 zinc finger protein which based on homology belongs to the family of mammalian Kruppel-like transcription factors which are involved in regulation of cellular development and differentiation; klf-1 is essential for fat regulation; RNA interference studies indicate that klf-1 may also be involved in apoptosis and the phagocytosis of apoptotic cells in the uterus and germline; …	13.03	Y			ENSG00000118922	KLF12	Zinc finger C2H2-type/integrase DNA-binding domain
WBGene00007708	nola-3	none available	13.03	Y			ENSG00000182117	NOP10	H/ACA ribonucleoprotein complex, subunit Nop10
WBGene00008000	slc-17.2	C38C10.2 is orthologous to the human gene SOLUTE CARRIER FAMILY 17 (ANION/SUGAR TRANSPORTER), MEMBER 5 (SLC17A5; OMIM:604322), which when mutated leads to disease.	13.03	Y		Y	ENSG00000146039	SLC17A4	Major facilitator superfamily
WBGene00013360	Y60A3A.9	none available	13.03				ENSG00000215367	n/a	GOLD domain
WBGene00002055	ifc-1	ifc-1 encodes a nonessential intermediate filament protein; IFC-1 is predicted to function as a structural component of the cytoskeleton; IFC-1 has no function in RNAi assays.	13.02				ENSG00000186442	KRT3	Intermediate filament protein
WBGene00000381	cct-6	cct-6 encodes, by alternative splicing, two isoforms of a putative zeta subunit of the eukaryotic cytosolic ("T complex") chaperonin, orthologous to human CCT6A (OMIM:104613); CCT-6 represses SKN-1-dependent transcription of gst-4; CCT-6 is expressed in a few cells of pre-comma stage embryos; in mass RNAi assays, CCT-6 is required for normally short life span, and for normal transgene subcellular…	13		Y		ENSG00000132141	CCT6B	Chaperonin Cpn60/TCP-1 family
WBGene00010236	F58B4.3	none available	12.99				n/a	n/a	n/a
WBGene00010034	F54B11.11	none available	12.94				n/a	n/a	n/a
WBGene00004274	rab-11.1	rab-11.1 encodes a small GTPase homologous to the Rab GTPases that function in endocytosis, membrane fusion, and vesicular trafficking events; RAB-11.1 activity is required for completion of the final stages of cytokinesis during early embryogenesis and for efficient uptake of yolk proteins during oocyte development; RAB-11.1 is also required for normal peripheral localization of nuclei in the sy…	12.94	Y		Y	ENSG00000132698	RAB25	Small GTPase superfamily
WBGene00007331	pho-11	none available	12.93	Y			ENSG00000142513	ACPT	Histidine phosphatase superfamily, clade-2
WBGene00010038	rheb-1	rheb-1 encodes a GTPase orthologous to the mammalian Rheb and Rheb1 GTPases; by homology, RHEB-1 is predicted to function as a regulator of LET_363/TOR function; in C. elegans, rheb-1 plays an essential role in mediating intermittent fasting (IF)-induced longevity; further, loss of rheb-1 activity via RNAi indicates that rheb-1 is involved in the mitochondrial unfolded protein response and that i…	12.92	Y			ENSG00000167550	RHEBL1	Small GTPase superfamily
WBGene00003947	pbs-1	pbs-1 encodes a protease subunit with highest similarity to vertebrate proteasome subunit beta type 6 that affects fertility, embryonic viability, locomotion, and larval viability	12.91	Y	Y	Y	ENSG00000243067	PSMB9	Peptidase T1A, proteasome beta-subunit
WBGene00008040	ttr-5	C40H1.5 encodes a protein containing a predicted signal sequence followed by a transthyretin-like domain; the product of C40H1.5 belongs to a family of apparently nematode-specific proteins whose function is not yet known.	12.89	Y	Y		n/a	n/a	n/a
WBGene00010491	K02B7.3	none available	12.88		Y		n/a	n/a	n/a
WBGene00001462	flp-19	none available	12.87				n/a	n/a	n/a
WBGene00015755	C14B9.10	none available	12.86	Y			n/a	n/a	n/a
WBGene00021893	ndnf-1	none available	12.86			Y	ENSG00000173376	NDNF	Protein of unknown function DUF2369
WBGene00004394	rol-1	rol-1 encodes a nematode cuticular collagen required for normal body morphology at the adult stage of development; rol-1 expression is under the control of the heterochronic pathway, as heterochronic mutants that synthesize adult cuticle early produce animals that roll as larvae, while heterochronic mutants that fail to execute normal adult development never display the roller phenotype.	12.84			Y	n/a	n/a	n/a
WBGene00001863	him-4	The him-4 gene encodes a large (5198-residue) extracellular protein, called "hemicentin", that belongs to the immunoglobulin superfamily.	12.82	Y	Y		ENSG00000072195	SPEG	EGF-like domain
WBGene00000762	coq-2	coq-2 encodes a putative para-hydroxybenzoate-polyprenyl transferase (UbiA prenyltransferase), orthologous to S. cerevisiae COQ2; COQ-2 is required for ubiquinone (coenzyme Q9) biosynthesis and for normally short lifespan; coq-2 mutants have slowed pharyngeal pumping, and eventually arrest as paralysed larvae before dying; coq-2(RNAi) animals have reduced levels of coenzyme Q9 and superoxide, and…	12.81			Y	ENSG00000173085	COQ2	UbiA prenyltransferase family
WBGene00009045	F22B5.10	none available	12.81	Y		Y	ENSG00000143183	TMCO1	Protein of unknown function DUF106, transmembrane
WBGene00010875	M05D6.2	none available	12.81				ENSG00000215029	TCP11X2	T-complex 11
WBGene00001648	goa-1	goa-1 encodes an ortholog of the heterotrimeric G protein alpha subunit Go (Go/Gi class); GOA-1 activity is required for regulation of a number of behaviors, including locomotion, egg-laying, male mating, and olfactory-mediated behaviors; GOA-1 activity is also required for asymmetric cell division in the early embryo; goa-1 genetically interacts with the egl-30 pathway, and is expressed in all n…	12.79	Y		Y	ENSG00000214415	GNAT3	Guanine nucleotide binding protein (G-protein), alpha subunit
WBGene00006604	tra-1	tra-1 encodes Zn2+-finger-containing proteins that are the sole C. elegans members of the GLI transcription factor family; during development, tra-1 functions cell autonomously as the terminal regulator of the sex determination pathway and positively regulates all aspects of hermaphrodite somatic sexual differentiation; in addition, tra-1 activity is required for proper development of the male so…	12.78				ENSG00000126603	GLIS2	Zinc finger C2H2-type/integrase DNA-binding domain
WBGene00004271	rab-7	rab-7 encodes a Rab GTPase orthologous to the Rab7 GTPases of yeast, Drosophila, and vertebrates; RAB-7 is required for endosome and endosome to lysosome trafficking and thus, for proper yolk protein transport in oocytes and transport of endocytosed materials in coelomoyctes; RAB-7 is also required for apoptotic cell clearance, particularly for regulation of lysosome to phagosome fusion; RAB-7 ac…	12.77	Y			ENSG00000075785	RAB7A	Small GTPase superfamily
WBGene00012221	W03C9.5	none available	12.77	Y			n/a	n/a	n/a
WBGene00013039	scav-3	Y49E10.20 encodes a ortholog of human CD36 antigen (OMIM:173510, mutated in platelet glycoprotein IV deficiency); Y49E10.20 is needed for cell corpse engulfment in the germline and in the three-fold embryo, and for migration of the anterior arm of the gonad.	12.75				ENSG00000073060	SCARB1	CD36 family
WBGene00013079	ttr-26	none available	12.74	Y			n/a	n/a	n/a
WBGene00005016	sqt-1	sqt-1 encodes a cuticle collagen; during larval and adult development, sqt-1 activity is required, likely redundantly, for normal cuticle, and hence organismal, morphology; sqt-1 mRNA abundance oscillates during larval development, peaking at one point during each larval stage and peaking again in adults; sqt-1 transcripts are also detected in animals at the L1-L2d molt; in the temporally distinc…	12.73				ENSG00000206561	COLQ	Nematode cuticle collagen, N-terminal
WBGene00012489	Y19D2B.1	none available	12.7				ENSG00000198033	TUBA3C	Tubulin
WBGene00001149	bcat-1	bcat-1 encodes a branched-chain amino acid aminotransferase that, by homology, is predicted to catalyze the first reaction in the catabolism of essential branched-chain amino acids such as leucine, isoleucine, and valine; in C. elegans, large-scale RNA-mediated interference (RNAi) screens indicate that bcat-1 activity is required for embryonic and larval development.	12.69	Y	Y		ENSG00000105552	BCAT2	Aminotransferase class IV
WBGene00003765	nlp-27	nlp-27 encodes a predicted neuropeptide with homology to C. elegans nlp-28 through nlp-31.	12.69				n/a	n/a	n/a
WBGene00015143	B0336.3	none available	12.68			Y	ENSG00000275740	n/a	RNA recognition motif domain
WBGene00022794	snu-23	none available	12.68				ENSG00000146007	ZMAT2	Zinc finger, U1-type
WBGene00015676	mct-6	none available	12.67				ENSG00000108932	SLC16A6	Major facilitator superfamily
WBGene00011831	T19B10.2	none available	12.67	Y			n/a	n/a	n/a
WBGene00001430	fkb-5	fkb-5 encodes a peptidyl-prolyl cis-trans isomerase (PPIase) that is one of eight FK506 binding proteins encoded by the C. elegans genome; although fkb-5 single mutants show no obvious defects, animals doubly and triply mutant for fkb-5 and other FKB secretory pathway mutants display synthetic, cold-sensitive body morphology and molting defects as well as L1 larval lethality; an fkb-5::lacZ repor…	12.66		Y		ENSG00000134285	FKBP11	FKBP-type peptidyl-prolyl cis-trans isomerase domain
WBGene00022492	dss-1	dss-1 encodes the C. elegans ortholog of human DSS1 (deleted in split hand/split foot 1) and Saccharomyces cerevisiae SEM1, subunits of the 26S proteasome regulatory particle; in C. elegans, DSS-1 is an essential protein, required for oogenesis and for embryonic and larval development; in addition, dss-1 appears to be required for proper development and/or function of the intestine and dss-1 may …	12.65				ENSG00000214857	n/a	DSS1/SEM1
WBGene00010579	K05C4.2	none available	12.65	Y		Y	ENSG00000171135	JAGN1	Protein jagunal
WBGene00019726	bris-1	none available	12.63	Y			ENSG00000262607	IQSEC3	Sec7 domain
WBGene00010050	F54D5.4	none available	12.63				n/a	n/a	n/a
WBGene00012484	car-1	car-1 encodes a putative RNA-binding protein orthologous to budding yeast Scd6p, fission yeast Sum2p, Drosophila TRAL, and human LSM14A and LSM14B; CAR-1 inhibits physiological apoptosis in oocytes, keeping it down to a normal level of ~50% in hermaphrodite gonads; independently of apoptosis, CAR-1 is also required for normal oogenesis, early embryonic cytokinesis, and normally organized endoplas…	12.62	Y		Y	ENSG00000262860	LSM14A	LSM domain
WBGene00003588	nex-1	nex-1 encodes an annexin, a member of a family of calcium-dependent phospholipid binding proteins; NEX-1 is required for efficient engulfment of apoptotic cell corpses in the pharynx, and may also function in other membrane fusion events, such as exocytosis; NEX-1 in vitro can bind phosphatidylserine, phosphatidylinositol, heparin, heparan sulfate, and chondroitin sulfate; NEX-1 is expressed in t…	12.62	Y		Y	ENSG00000265190	ANXA8	Annexin
WBGene00020218	T04G9.7	none available	12.62				n/a	n/a	n/a
WBGene00003966	pdl-1	pdl-1 encodes the C. elegans ortholog of the mammalian cGMP phosphodiesterase delta subunit (PDE6D); genetic analyses indicate that pdl-1 plays a role in regulating gustatory plasticity.	12.61				ENSG00000175970	UNC119B	GMP phosphodiesterase, delta subunit
WBGene00017362	F10G2.1	none available	12.56	Y			n/a	n/a	n/a
WBGene00011723	T12A7.2	none available	12.55				n/a	n/a	n/a
WBGene00020931	cytb-5.2	none available	12.54	Y			ENSG00000166347	CYB5A	Cytochrome b5-like heme/steroid binding domain
WBGene00020932	dhod-1	none available	12.54	Y			ENSG00000102967	DHODH	Dihydroorotate dehydrogenase, class 2
WBGene00019617	K10C2.1	none available	12.53				ENSG00000106066	CPVL	Peptidase S10, serine carboxypeptidase
WBGene00008426	D2045.9	none available	12.51	Y		Y	ENSG00000167123	CERCAM	Glycosyl transferase, family 25
WBGene00021534	mvk-1	mvk-1 encodes an ortholog of the human gene MEVALONATE KINASE (MVK), which when mutated leads to mevalonicaciduria (OMIM:251170).	12.51	Y		Y	ENSG00000110921	MVK	GHMP kinase N-terminal domain
WBGene00022389	pde-6	pde-6 encodes a 3"-5"-cAMP phosphodiesterase most similar to the mammalian PDE8 family of enzymes; in C. elegans, PDE-6 activity is required for negative regulation of oocyte maturation.	12.51				ENSG00000113231	PDE8B	PAS domain
WBGene00013340	tcc-1	none available	12.51				n/a	n/a	n/a
WBGene00021325	Y34B4A.9	none available	12.51	Y			n/a	n/a	n/a
WBGene00016250	hsp-110	C30C11.4 encodes a member of the Hsp70 family of heat shock proteins; loss of C30C11.4 activity via large-scale RNAi screens results in a variety of defects including embryonic and larval lethality, slow growth rates, and locomotory and morphological defects; in addition loss of C30C11.4 has been reported to result in a small but reproducible reduction in adult lifespan in otherwise long-lived an…	12.5	Y			ENSG00000164070	HSPA4L	Heat shock protein 70 family
WBGene00010793	LLC1.2	none available	12.49				n/a	n/a	n/a
WBGene00021690	Y48G8AL.12	none available	12.47				n/a	n/a	n/a
WBGene00006527	tax-6	tax-6 encodes an ortholog of calcineurin A that is required for inhibition and adaptation of several sensory neurons and for the normal regulation of egg-laying by serotonin; TAX-6 stimulates transcription of rcn-1, and binds RCN-1 protein if free Ca[2+] is present; in general, calcineurin positively regulates calcium-dependent signaling; tax-6 loss-of-function mutants exhibit an extended lifespa…	12.46	Y			ENSG00000120910	PPP3CC	Calcineurin-like phosphoesterase domain, apaH type
WBGene00010407	H19N07.3	none available	12.45		Y		n/a	n/a	n/a
WBGene00009952	acaa-2	none available	12.43				ENSG00000120437	ACAT2	Thiolase
WBGene00010326	F59C6.5	none available	12.43	Y			ENSG00000140990	NDUFB10	NADH-ubiquinone oxidoreductase, subunit 10
WBGene00019650	K11D12.11	none available	12.43				n/a	n/a	n/a
WBGene00006739	ulp-4	none available	12.42	Y			ENSG00000138468	SENP7	Ulp1 protease family, C-terminal catalytic domain
WBGene00017735	did-2	none available	12.4				ENSG00000255112	CHMP1B	Snf7 family
WBGene00003238	mig-1	mig-1 encodes one of four C. elegans Frizzled-like receptors; mig-1 was initially identified in screens for animals with defective cell migrations, and its activity is required for proper migration of the QL neuroblast and the HSN neurons.	12.4		Y		ENSG00000188763	FZD9	Frizzled protein
WBGene00006710	ubc-15	ubc-15 encodes an E2 ubiquitin-conjugating enzyme predicted to mediate the covalent attachment of an activated ubiquityl moiety to a substrate protein; as loss of UBC-15 activity via RNA-mediated interference (RNAi) does not result in any abnormalities, the precise role of UBC-15 in C. elegans development and/or behavior is not yet known; by sequence similarity, however, UBC-15 is predicted to fu…	12.39	Y			ENSG00000160087	UBE2J2	Ubiquitin-conjugating enzyme E2
WBGene00022382	Y94H6A.10	none available	12.38	Y			n/a	n/a	n/a
WBGene00006587	tnt-2	none available	12.37	Y	Y		ENSG00000130595	TNNT3	Troponin T
WBGene00012291	W06A7.2	none available	12.35		Y		n/a	n/a	n/a
WBGene00002059	ife-1	The ife-1 gene encodes one of five C. elegans homologs of the mRNA cap-binding protein eIF4E; it is specifically required for spermatogenesis, and is expressed in P granules.	12.34				ENSG00000175766	EIF4E1B	Translation Initiation factor eIF- 4e
WBGene00006942	wrk-1	wrk-1 encodes, by alternative splicing, at least three isoforms of a GPI-anchored immunoglobulin superfamily (IgSF) protein orthologous to Drosophila KLINGON, WRAPPER, CG7166, and CG13506; WRK-1 is expressed in the pioneering embryonic motoneurons (eMNs) DA, DB, and DD; WRK-1 expression in DA, DB, and DD is necessary and sufficient to prevent follower axons from inappropriately crossing the ventr…	12.33	Y			ENSG00000185565	LSAMP	Immunoglobulin subtype 2
WBGene00008443	pde-3	none available	12.32				n/a	n/a	n/a
WBGene00011529	T06D8.9	none available	12.32		Y		ENSG00000133872	SARAF	Store-operated calcium entry-associated regulatory factor
WBGene00000527	cle-1	cle-1 encodes the only vertebrate type XV/XVIII collagen homolog in C. elegans and generates multiple developmentally regulated protein isoforms via alternative splicing; cle-1 is required for neuron migrations, including the migration of the HSN, ALM and AVM neurons, axon guidance of the sensory and motor neurons, distal tip cell migration, and for proper morphogenesis of the mail tail; cle-1 is…	12.3			Y	ENSG00000204291	COL15A1	Fibronectin type III
WBGene00002255	lbp-3	lbp-3 encodes a predicted secreted fatty acid binding protein (FABP) that is similar to the Ascaris suum secreted FABP As-p18; by homology, LBP-3 is predicted to function in sequestering or transporting small hydrophobic molecules such as lipids and steroid hormones; an lbp-3::gfp promoter fusion is expressed in the embryo, with expression seen in presumptive hypodermal cells by the comma stage a…	12.29		Y		n/a	n/a	n/a
WBGene00021068	W06H8.6	none available	12.27	Y			n/a	n/a	n/a
WBGene00006533	tba-7	none available	12.26				ENSG00000214391	n/a	Tubulin
WBGene00020517	hpo-8	none available	12.25	Y			ENSG00000165996	HACD1	Protein-tyrosine phosphatase-like, PTPLA
WBGene00007145	B0334.5	none available	12.23				ENSG00000156170	NDUFAF6	Squalene/phytoene synthase
WBGene00000832	ctn-1	ctn-1 encodes a protein that belongs to the alpha-catulin family of catenin-like proteins; CTN-1 physically interacts in vivo with DYB-1/dystrobrevin; a ctn-1::GFP fusion is expressed in body wall, vulval, and anal muscles; in body wall muscles, CTN-1::GFP localizes to the plasma membranes near dense bodies.	12.23		Y	Y	ENSG00000119326	CTNNAL1	Alpha-catenin
WBGene00195248	emc-5	none available	12.23				ENSG00000169446	MMGT1	Magnesium transporter
WBGene00020097	larp-1	larp-1 encodes an La-related protein containing an La RNA-binding motif and a conserved LARP1 domain; loss of larp-1 activity results in defective oogenesis, which is suppressed by loss of function mutations in Ras-MAPK signaling components, suggesting that in the germline, LARP-1 functions to negatively regulate Ras-MAPK pathway activity; as LARP-1 binds RNA homopolymers in vitro and larp-1 muta…	12.19	Y		Y	ENSG00000155506	LARP1	Protein of unknown function DM15
WBGene00000748	col-175	none available	12.17				ENSG00000133661	SFTPD	Nematode cuticle collagen, N-terminal
WBGene00016084	cht-3	none available	12.16				n/a	n/a	n/a
WBGene00022029	Y65B4A.6	none available	12.16				ENSG00000141543	EIF4A3	Helicase, C-terminal
WBGene00004807	skr-1	The skr-1 gene encodes a homolog of Skp1 in S. cerevisiae that is required for the restraint of cell proliferation, progression through the pachytene stage of meiosis, and the formation of bivalent chromosomes at diakinesis.	12.15	Y			ENSG00000272772	n/a	S-phase kinase-associated protein 1-like
WBGene00018487	F46C8.8	none available	12.14				n/a	n/a	n/a
WBGene00206532	F11A6.15	none available	12.13				n/a	n/a	n/a
WBGene00006759	unc-22	unc-22 encodes twitchin, a giant intracellular protein with multiple fibronectin- and immunoglobulin-like domains and a single protein kinase domain that is homologous to titin (OMIM:188840); UNC-22 is required in muscle for regulation of the actomyosin contraction-relaxation cycle and for maintenance of normal muscle morphology; UNC-22 associates with myosin and is localized to A-bands; in vitro…	12.11	Y	Y		ENSG00000072195	SPEG	Protein kinase domain
WBGene00002162	isp-1	isp-1 encodes a Rieske iron sulphur protein (ISP) which is a subunit of the mitochondrial complex III in the mitochondrial membrane; the subunits are highly conserved in all mitochondria and aerobic bacteria; mitochondrial complex III catalyses electron transport from ubiquinol to cytochrome c; isp-1 mutants show low oxygen consumption, a decreased sensitivity to reactive oxygen species and incre…	12.09		Y	Y	ENSG00000169021	UQCRFS1	Ubiquinol cytochrome reductase, transmembrane domain
WBGene00004266	rab-1	rab-1 encodes an ortholog of the small Ras-like GTPase Rab1; by homology, RAB-1 is predicted to play a role in intracellular vesicle trafficking, and consistent with this broad role, large-scale RNAi screens indicate that rab-1 activity is required for fertility, movement, and survival; in yeast two-hybrid assays, RAB-1 interacts with TIR-1, a C. elegans SARM ortholog that is required for innate …	12.08	Y		Y	ENSG00000174903	RAB1B	Small GTPase superfamily
WBGene00002272	lec-9	lec-9 encodes a predicted lectin that affects embryonic viability.	12.07				ENSG00000131981	LGALS3	Galectin, carbohydrate recognition domain
WBGene00018395	mtch-1	none available	12.01	Y			ENSG00000137409	MTCH1	Mitochondrial carrier domain
WBGene00022781	pmt-1	pmt-1 encodes, by alternative splicing, four isoforms of an experimentally validated phosphoethanolamine N-methyltransferase required for phosphocholine biosynthesis and viability; PMT-1 lacks known mammalian orthologs, but has orthologs in parasitic nematodes, fish, amphibians, echinoderms, plants, alveolata, and bacteria; PMT-1 is distantly paralogous to PMT-2; PMT-1 catalyses the conversion of…	12.01	Y			n/a	n/a	n/a
WBGene00004387	rnp-4	rnp-4 encodes a putative member of the exon-exon junction complex, orthologous to Y14 in S. cerevisiae and TSUNAGI in D. melanogaster; RNP-4 is required for embryonic viability, fertility, vulval development, and cuticular integrity; however, rnp-4(RNAi) animals show no accumulation of poly(A)+ mRNA in their nuclei, indicating that RNP-4 is dispensable for mRNA export.	12.01	Y			ENSG00000265241	RBM8A	RNA recognition motif domain
WBGene00011111	snfc-5	snfc-5 encodes a homolog of SNF5/Ini1, a component of the SWI/SNF complex that is conserved from yeast to mammals and that is involved in chromatin remodeling; snfc-5 may be involved in asymmetric cell division of the T cells.	12.01				ENSG00000275837	SMARCB1	SNF5/SMARCB1/INI1
WBGene00009180	nurf-1	nurf-1 encodes the C. elegans ortholog of Drosophila NURF301, a component of the NURF chromatin remodeling complex; in C. elegans, nurf-1 acts with isw-1 to regulate vulval development.	11.99	Y			ENSG00000171634	BPTF	Bromodomain
WBGene00021095	mlt-8	mlt-8 encodes a novel protein; during development, mlt-8 activity is required for molting; a mlt-8::gfp reporter is expressed in hypodermal cells and in a single posterior neuron.	11.97			Y	n/a	n/a	n/a
WBGene00044998	M199.9	none available	11.96				n/a	n/a	n/a
WBGene00017065	D2092.4	none available	11.91		Y		ENSG00000065485	PDIA5	Thioredoxin-like fold
WBGene00010615	K07A1.9	none available	11.9			Y	ENSG00000107669	ATE1	Arginine-tRNA-protein transferase, N-terminal
WBGene00022856	cth-2	cth-2 encodes a putative cystathionine gamma-lyase; CTH-2 is orthologous to human CTH (OMIM:607657, mutated in cystathioninuria), extremely similar to its paralog CTH-1, and also paralogous to CBL-1; either CTH-2, or CTH-1, or both proteins weakly inhibit DHC-1 in vivo; CTH-2 is expressed in both larval and adult hypodermis, anal depressor muscle, and body wall muscle, as well as in adult vulval …	11.89	Y			ENSG00000116761	CTH	Cys/Met metabolism, pyridoxal phosphate-dependent enzyme
WBGene00010877	lact-4	lact-4 encodes a beta-lactamase domain-containing protein that contains predicted signal and transmembrane sequences in its N terminus.	11.86	Y	Y		n/a	n/a	n/a
WBGene00010878	M05D6.5	none available	11.86	Y	Y		n/a	n/a	n/a
WBGene00010879	M05D6.6	none available	11.86		Y		n/a	n/a	n/a
WBGene00015273	mct-2	none available	11.84	Y			ENSG00000168679	SLC16A4	Major facilitator superfamily
WBGene00016500	memo-1	none available	11.84	Y			ENSG00000162959	MEMO1	MEMO1 family
WBGene00010337	F59F4.2	none available	11.83	Y			ENSG00000120742	SERP1	Stress-associated endoplasmic reticulum protein
WBGene00195068	Y48G8AL.16	none available	11.82				n/a	n/a	n/a
WBGene00013670	hpo-13	none available	11.8				ENSG00000070610	GBA2	Glycosyl-hydrolase family 116, catalytic region
WBGene00000988	dhs-25	dhs-25 encodes a short-chain dehydrogenase predicted to be mitochondrial.	11.77		Y		ENSG00000145439	CBR4	Short-chain dehydrogenase/reductase SDR
WBGene00010794	dld-1	LLC1.3 is orthologous to the human gene DIHYDROLIPOAMIDE DEHYDROGENASE (DLD; OMIM:246900), which when mutated leads to dihydrolipoamide dehydrogenase deficiency.	11.77	Y			ENSG00000091140	DLD	Pyridine nucleotide-disulphide oxidoreductase, dimerisation domain
WBGene00010528	K03D3.2	none available	11.76				n/a	n/a	n/a
WBGene00006771	tln-1	none available	11.75	Y			ENSG00000137076	TLN1	IRS-type PTB domain
WBGene00020839	usp-5	none available	11.75	Y			ENSG00000058056	USP13	Peptidase C19, ubiquitin carboxyl-terminal hydrolase
WBGene00005000	spp-15	none available	11.74		Y		n/a	n/a	n/a
WBGene00018784	F54A3.5	none available	11.73	Y			ENSG00000173436	MINOS1	Protein of unknown function DUF543
WBGene00001452	flp-9	flp-9 encodes a predicted FMRFamide-like peptide neurotransmitter that inhibits action potentials in the pharyngeal muscle when applied to the pharynx of dissected worms and inhibits movement when injected into A. suum; expressed at highest levels prior to adulthood.	11.73	Y			n/a	n/a	n/a
WBGene00006702	ubc-3	ubc-3 encodes an E2 ubiquitin-conjugating enzyme orthologous to Saccharomyces cerevisiae and human CDC34 (OMIM:603731) which are involved in regulating protein stability during G1 and G2 cell cycle phase transitions; by homology, UBC-3 is likely required for covalent attachment of ubiquitin to select target proteins to facilitate their degradation; however, as loss of UBC-3 activity via RNA-media…	11.72	Y			ENSG00000099804	CDC34	Ubiquitin-conjugating enzyme E2
WBGene00017639	F20D6.10	none available	11.71				n/a	n/a	n/a
WBGene00008506	tkt-1	tkt-1 encodes an ortholog of the human gene TRANSKETOLASE (TKT; OMIM:606781), which when mutated leads to Wernicke-Korsakoff syndrome (OMIM:277730).	11.71				ENSG00000007350	TKTL1	Transketolase, N-terminal
WBGene00022287	Y75B7AR.1	none available	11.71				n/a	n/a	n/a
WBGene00001232	eif-3.I	none available	11.7				ENSG00000084623	EIF3I	WD40 repeat
WBGene00002071	ile-2	none available	11.69				ENSG00000169223	LMAN2	Legume-like lectin
WBGene00011510	pdha-1	T05H10.6 encodes an ortholog of the human gene PYRUVATE DEHYDROGENASE (LIPOAMIDE) ALPHA 1 (PDHA1; OMIM:312170), which when mutated leads to Leigh syndrome (OMIM:256000).	11.68	Y			ENSG00000163114	PDHA2	Dehydrogenase, E1 component
WBGene00006734	ufd-2	ufd-2 encodes an E4 ubiquitin conjugation factor orthologous to Saccharomyces cerevisiae Ufd2p which catalyzes multiubiquitin chain assembly; during development, UFD-2 acts in a complex with the C. elegans CHIP ortholog CHN-1 and the ubiquitin-selective chaperone CDC-48.1 to ubiquitinate, and thus negatively regulate, the UNC-45 myosin chaperone whose activity is essential for normal sarcomere as…	11.68	Y			ENSG00000130939	UBE4B	U box domain
WBGene00021005	W03F11.1	W03F11.1 encodes a protein with three chitin-binding peritrophin-A domains; like CEJ-1 and CPG-2, W03F11.1 may participate in eggshell synthesis and early embryonic development; W03F11.1 is required for fertility in mass RNAi assays; W03F11.1"s multiple peritrophin-A domains might enable mechanical cross-linking of chitin.	11.67				n/a	n/a	n/a
WBGene00002273	lec-10	lec-10 encodes a galectin, a soluble galactose-binding lectin; recombinant lec-10 can bind to sugar in an in vitro assay.	11.66			Y	ENSG00000131981	LGALS3	Galectin, carbohydrate recognition domain
WBGene00020297	nog-1	T07A9.9 encodes a GTPase with similarity to the mammalian CRFG proteins and Saccharomyces cerevisiae nucleolar NOG1 involved in biogenesis of the 60S ribosomal subunit; in C. elegans, T07A9.9 plays a role in regulating growth, development, lifespan, and fat metabolism; T07A9.9::GFP reporter fusions expressed ubiquitously throughout the life cycle and localizes to the nucleus; in intestinal cells,…	11.65	Y		Y	ENSG00000107937	GTPBP4	Small GTP-binding protein domain
WBGene00020296	T07A9.8	none available	11.65	Y			ENSG00000132275	RRP8	Ribosomal RNA processing protein 8
WBGene00021322	Y34B4A.6	none available	11.64				n/a	n/a	n/a
WBGene00012663	hex-3	hex-3 encodes a beta-N-acetylhexosaminidase.	11.61			Y	ENSG00000169660	HEXDC	Glycoside hydrolase, catalytic domain
WBGene00044001	C09G4.4	none available	11.6	Y			n/a	n/a	n/a
WBGene00001051	cks-1	A homolog of Cks/Suc1, a highly conserved member of the eukaryotic cell cycle machinery that affects both meiosis and mitosis and has a role in the inactivation of the M-phase promoting factor (MPF) during early embryogenesis.	11.6	Y			ENSG00000178556	n/a	Cyclin-dependent kinase, regulatory subunit
WBGene00003224	mes-6	mes-6 encodes a WD repeat-containing protein that is orthologous to Drosophila Extra sex combs (Esc); as a member of a Polycomb-like chromatin repressive complex with MES-2 and MES-3, MES-6 is required maternally for normal germline development and during larval development, for anteroposterior patterning; during germline development, the MES-2/MES-3/MES-6 complex is believed to be essential for …	11.6	Y			ENSG00000074266	EED	WD40 repeat
WBGene00017926	F29C4.2	none available	11.59	Y			n/a	n/a	n/a
WBGene00010639	K07F5.15	The K07F5.15 gene encodes a small protein that is of ancient origin, and thus is presumably important to eukaryotic life; it is homologous to YNL024C-A (also known as NNL005C) in S. cerevisiae, and has homologs in Drosophila, mammals, and Neurospora, most of which are also small (<100-residue) proteins.	11.59	Y			ENSG00000215717	TMEM167B	Protein kish
WBGene00021686	Y48G8AL.5	none available	11.58				ENSG00000037474	NSUN2	SAM-dependent methyltransferase RsmB/NOP2-type
WBGene00003429	msp-31	msp-31 encodes a member of the major sperm protein family; msp-31 has a C. briggsae homolog as predicted by the Wobble Aware Bulk Aligner (WABA); expression is enriched in sperm.	11.57				n/a	n/a	n/a
WBGene00002363	let-92	let-92 encodes a homolog of PP2AC, the catalytic subunit of protein phosphatase 2A (PP2A); let-92 was identified genetically in screens for essential genes on chromosome IV; LET-92 may regulate a number of signal transduction pathways as it is required for embryogenesis, larval development, Ras-mediated vulval development, and axonal guidance in the DD and VD neurons; let-92 interacts genetically…	11.56	Y			ENSG00000104695	PPP2CB	Calcineurin-like phosphoesterase domain, apaH type
WBGene00016422	noah-1	noah-1 encodes a PAN and ZP domain-containing protein that is related to the Drosophila extracellular matrix component NompA (no-mechanoreceptor-potential A); loss of noah-1 function via RNAi indicates that NOAH-1 activity is essential for molting; in addition, NOAH-1 appears to be required for embryonic and larval development, vulval development, coordinated locomotion, and normal body morpholog…	11.56	Y			n/a	n/a	n/a
WBGene00000474	cey-3	cey-3 encodes a protein with a cold-shock/Y-box domain; CEY-3 associates with CGH-1, CEY-2, and CEY-4 in cytoplasmic particles of the gonad and early embryo.	11.55				ENSG00000231167	n/a	Cold-shock protein, DNA-binding
WBGene00004131	pqn-44	The protein product of this gene is predicted to contain a glutamine/asparagine (Q/N)-rich ("prion") domain, by the algorithm of Michelitsch and Weissman (as of the WS77 release of WormBase, i.e., in wormpep77).	11.55	Y			ENSG00000174016	FAM46D	FAM46 family
WBGene00019839	R02F11.1	none available	11.55	Y			n/a	n/a	n/a
WBGene00021872	clec-85	none available	11.52				n/a	n/a	n/a
WBGene00021292	copb-1	Y25C1A.5 encodes a beta subunit of the coatomer (COPI) complex; in mass RNAi assays, Y25C1A.5 is required for fertility, adult viability, osmoregulation, and general health.	11.5	Y		Y	ENSG00000129083	COPB1	Clathrin/coatomer adaptor, adaptin-like, N-terminal
WBGene00020831	T26C12.1	none available	11.5				ENSG00000131373	HACL1	Thiamine pyrophosphate enzyme, C-terminal TPP-binding
WBGene00015805	C15H9.11	none available	11.49			Y	n/a	n/a	n/a
WBGene00000987	dhs-24	dhs-24 encodes a member of the short-chain dehydrogenases/reductases family (SDR).	11.48				ENSG00000169084	DHRSX	Short-chain dehydrogenase/reductase SDR
WBGene00014171	nep-26	ZK970.1 encodes, by alternative splicing, two isoforms of a neprilysin; neprilysins are thermolysin-like zinc metallopeptidases, found on the outer surface of animal cells, that negatively regulate small signalling peptides (e.g., enkephalin, tachykinin, insulin, and natriuretic peptides) by cleaving them; ZK970.1 has no clear orthologs in other organisms.	11.48				ENSG00000171551	ECEL1	Peptidase M13
WBGene00013969	tep-1	none available	11.48	Y	Y		ENSG00000156535	CD109	Alpha-2-macroglobulin
WBGene00021800	Y53G8AL.2	none available	11.48				ENSG00000255639	n/a	NAD(P)-binding domain
WBGene00016781	C49G7.3	none available	11.47	Y		Y	n/a	n/a	n/a
WBGene00009498	tat-5	tat-5 encodes one of six C. elegans P4-type ATPases and is homologous to S. cerevisiae Neo1p; TAT-5 functions as an aminophospholipid translocase (flippase) whose activity is required to prevent phosphatidylethanolamine (PE) exposure on the outer plasma membrane and thus negatively regulate formation of extracellular vesicles known as ectosomes or microparticles; tat-5 loss-of-function mutations …	11.46	Y			ENSG00000054793	ATP9A	P-type ATPase
WBGene00001840	hel-1	hel-1 encodes an ortholog of human 56-kD U2AF65 associated protein (UAP56) that is required for exporting mRNAs from the nucleus; unlike animals with RNAi against several other splicing factors, hel-1(RNAi) animals fail to export transgenic GFP mRNA from the nucleus; conversely, hel-1 overexpression is lethal, with failed transgene expression as well.	11.45	Y			ENSG00000237889	DDX39B	Helicase, C-terminal
WBGene00008913	F17C11.1	none available	11.44	Y		Y	n/a	n/a	n/a
WBGene00021047	zfp-3	none available	11.44	Y			n/a	n/a	n/a
WBGene00077761	zip-9	none available	11.44	Y			n/a	n/a	n/a
WBGene00010428	dcn-1	dcn-1 encodes a protein containing UBA-like ubiquitin ligase and DUF298 domains that is orthologous to Saccharomyces cerevisiae Dcn1p; in C. elegans, DCN-1 activity is required for negative regulation of the MEI-1/katanin microtubule-severing complex that functions during meiosis but is inactivated prior to mitosis of the one cell-stage embryo; DCN-1 binds both ubiquitin and the ubiquitin-like Ne…	11.4				ENSG00000043093	DCUN1D1	Potentiating neddylation domain
WBGene00013221	Y54G11A.14	none available	11.38				n/a	n/a	n/a
WBGene00019097	F59B1.2	none available	11.37	Y			n/a	n/a	n/a
WBGene00007630	har-1	none available	11.37	Y	Y		ENSG00000273607	CHCHD10	CHCH
WBGene00010901	M28.10	none available	11.37			Y	n/a	n/a	n/a
WBGene00003687	nhr-97	none available	11.37	Y			n/a	n/a	n/a
WBGene00000110	alh-4	none available	11.36	Y			ENSG00000132746	ALDH3B2	Aldehyde dehydrogenase NAD(P)-dependent
WBGene00020275	atp-4	none available	11.36	Y			n/a	n/a	n/a
WBGene00010135	F55H12.4	none available	11.36	Y		Y	n/a	n/a	n/a
WBGene00003495	mup-2	mup-2 encodes the muscle contractile protein troponin T ( TnT ) homologous to vertebrate and invertebrate TnT and contains an invertebrate- specific COOH -terminal tail; mup-2 affects embryonic body wall muscle cell contraction, sarcomere organization, cell positioning, regulated muscle contraction in larval and adult body wall muscle, epidermal morphogenesis, and is required for proper function …	11.36	Y	Y		ENSG00000105048	TNNT1	Troponin T
WBGene00003727	nhr-137	none available	11.35				n/a	n/a	n/a
WBGene00022134	Y71G10AL.1	none available	11.35	Y			n/a	n/a	n/a
WBGene00000036	ace-2	An acetylcholineesterase involved in the termination of cholinergic nerve transmission; it is predominantly expressed in motoneurons.	11.33	Y		Y	ENSG00000087085	ACHE	Cholinesterase
WBGene00011648	cni-1	none available	11.32	Y			ENSG00000143771	CNIH4	Cornichon
WBGene00003704	nhr-114	nhr-114 encodes, by alternative splicing, two isoforms of a nuclear hormone receptor that specifically binds GPA-13 in yeast two-hybrid assays; the interaction of NHR-114 with GPA-13 is independent of whether GPA-13 is constitutively activated or not; NHR-114 is expressed in intestine (and weakly in hypodermal cells), with mainly nuclear localization; NHR-114 has no obvious function or phenotype …	11.32				ENSG00000025434	NR1H3	Nuclear hormone receptor, ligand-binding domain
WBGene00000882	cyn-6	cyn-6 encodes a cyclophilin most similar to human secreted cyclophilin type B isoforms that is functional when expressed in E. coli; it is expressed in the intestine.	11.31				ENSG00000168938	PPIC	Cyclophilin-type peptidyl-prolyl cis-trans isomerase domain
WBGene00016033	C24A3.2	none available	11.3	Y			n/a	n/a	n/a
WBGene00000596	col-7	col-7 encodes a member of the collagen superfamily containing collagen triple helix repeats (20 copies); expressed during the L2-to-dauer molt and the L4-to-adult molt.	11.3				ENSG00000133661	SFTPD	Nematode cuticle collagen, N-terminal
WBGene00022167	Y71H2AM.2	none available	11.3				ENSG00000155099	TMEM55A	Phosphatidylinositol 4,5-bisphosphate 4-phosphatase
WBGene00004302	ran-1	ran-1 encodes the C. elegans Ran GTPase ortholog; ran-1 activity is essential for proper mitotic spindle formation, effective connection between centrosomes and the male pronucleus, nuclear envelope assembly after cell division, and oocyte meiotic maturation; in regulating nuclear envelope dynamics, ran-1 appears to function upstream of MEL-28 by regulating its localization to the nuclear periphe…	11.29	Y		Y	ENSG00000132341	RAN	Small GTPase superfamily
WBGene00009440	idhg-1	F35G12.2 encodes the C. elegans ortholog of mitochondrial NAD+-isocitrate dehydrogenase.	11.28				ENSG00000101365	IDH3B	Isocitrate and isopropylmalate dehydrogenases family
WBGene00003916	par-1	par-1 encodes a serine-threonine kinase; maternally provided PAR-1 is essential for establishing early embryonic polarity; PAR-1 is present in the cytoplasm and in the cell cortex and asymmetrically localized to the posterior cortex of late one-cell stage embryos; PAR-1 is continuously asymmetrically localized to the P lineage (germline blastomeres) at each subsequent division, and evenly distrib…	11.27	Y		Y	ENSG00000116141	MARK1	Protein kinase domain
WBGene00004766	sel-9	sel-9 encodes a member of the p24 family of proteins that affects growth and locomotion and likely functions to negatively regulate the transport of lin-12 and glp-1 to the cell surface; genetically interacts with mutations in lin-12 that affect the extracellular domain with respect to egg laying, AC/VU fate decision, and vulval formation and interacts with glp-1 mutations with respect to proxima…	11.27				ENSG00000086598	TMED2	GOLD domain
WBGene00006541	tbh-1	tbh-1 encodes a tyramine beta-hydroxylase orthologous to human DBH (OMIM:609312, mutated in dopamine beta-hydroxylase deficiency); TBH-1 activity is required for biosynthesis of the octopamine neurotransmitter.	11.27				ENSG00000079931	MOXD1	Copper type II, ascorbate-dependent monooxygenase, N-terminal
WBGene00020942	W02D7.6	none available	11.27				n/a	n/a	n/a
WBGene00012897	pisy-1	none available	11.26	Y			ENSG00000103502	CDIPT	CDP-alcohol phosphatidyltransferase
WBGene00010130	vha-14	vha-14 encodes an ortholog of subunit D of the cytoplasmic (V1) domain of vacuolar proton-translocating ATPase (V-ATPase); VHA-14 is a predicted cytosolic rotor (stalk) component.	11.25	Y			ENSG00000100554	ATP6V1D	ATPase, V1 complex, subunit D
WBGene00004078	pos-1	pos-1 encodes a CCCH-type zinc-finger protein; during embryogenesis, maternally provided POS-1 is essential for proper fate specification of germ cells, intestine, pharynx, and hypodermis; POS-1"s role in cell fate specification is likely as a translational regulator, as POS-1 is required, in posterior blastomeres, for positive regulation of apx-1 mRNA translation and negative regulation of glp-1…	11.24	Y			n/a	n/a	n/a
WBGene00013078	ttr-25	none available	11.21		Y		n/a	n/a	n/a
WBGene00002134	inx-12	inx-12 (innexin=invertebrate connexin analogue) encodes a protein of the innexin family; innexins are gap junction proteins similar in function, though dissimilar in sequence to the vertebrate connexins; innexins are the only known gap junction proteins in invertebrates; inx-12 and inx-13 appear to be a tandom duplication; RNA interference of inx-12 results in an arrest at the L1 larval stage wit…	11.2				n/a	n/a	n/a
WBGene00020033	R12E2.7	none available	11.2				n/a	n/a	n/a
WBGene00018739	F53B1.8	none available	11.19				ENSG00000137571	SLCO5A1	Organic anion transporter polypeptide OATP
WBGene00006331	sup-26	sup-26 encodes an RRM domain-containing protein; SUP-26 functions in somatic sex determination via negative regulation of tra-2 translation; SUP-26 binds the tra-2 28-nucleotide repeat element known as the TRA-2/GLI element (TGE), which is located in tra-2 3";untranslated region (UTR); SUP-26 physically interacts with the poly(A)-binding protein PAB-1, suggesting that it may control tra-2 transla…	11.19	Y			ENSG00000186288	PABPC1L2A	RNA recognition motif domain
WBGene00009995	F53F4.13	none available	11.18				n/a	n/a	n/a
WBGene00044019	C55A6.12	none available	11.17				n/a	n/a	n/a
WBGene00012213	W02D9.7	none available	11.17				n/a	n/a	n/a
WBGene00195063	Y38C1AA.14	none available	11.16				ENSG00000106603	COA1	Cytochrome oxidase assembly protein 1
WBGene00022369	Y92H12BR.3	none available	11.16				n/a	n/a	n/a
WBGene00001620	glt-1	glt-1 encodes a predicted plasma membrane glutamate transporter that is functional when expressed in Xenopus oocytes; expressed in the M3 pharyngeal neuron, the male tail, some anterior hypodermal cells, and in cells in the terminal bulb of the pharynx.	11.15	Y			ENSG00000115902	SLC1A4	Sodium:dicarboxylate symporter
WBGene00007684	C18E9.4	C18E9.4 encodes the C. elegans ortholog of the NDUFB3/B12 subunit of the mitochondrial NADH dehydrogenase (ubiquinone) complex (complex I).	11.13	Y	Y		ENSG00000119013	NDUFB3	NADH dehydrogenase [ubiquinone] 1 beta subcomplex subunit 3
WBGene00007153	clec-41	none available	11.13				ENSG00000123610	TNFAIP6	CUB domain
WBGene00018776	F53H1.1	none available	11.13	Y			ENSG00000145833	DDX46	Helicase, C-terminal
WBGene00015184	djr-1.1	djr-1.1 encodes a glyoxylase orthologous to human DJ-1 (OMIM:602533, mutated in early-onset Parkinson disease); DJR-1.1 is required for resistance to rotenone, a mitochondrial complex I inhibitor that mimics Parkinson disease (PD); djr-1.1(RNAi) animals are partly rescued from PD-like sensitivity by D-beta-hydroxybutyrate or tauroursodeoxycholic acid, and fully rescued by both; by orthology with …	11.11				ENSG00000116288	PARK7	DJ-1/PfpI
WBGene00013481	Y69H2.3	none available	11.11	Y			n/a	n/a	n/a
WBGene00013378	emc-3	none available	11.1	Y			ENSG00000125037	EMC3	Protein of unknown function DUF106, transmembrane
WBGene00005648	srp-7	none available	11.1	Y			ENSG00000242550	SERPINB10	Serpin family
WBGene00017017	D1014.4	none available	11.08			Y	n/a	n/a	n/a
WBGene00017016	snap-1	none available	11.08	Y			ENSG00000125814	NAPB	NSF attachment protein
WBGene00000390	cdc-42	cdc-42 encodes a RHO GTPase; cdc-42 controls polarity of both individual cells and developing embryos by regulating the localization of PAR proteins; cdc-42 is also required for regulation of receptor-mediated endocytosis; CDC-42 is widely expressed and localizes to a number of different locations, including the cell cortex, centrosomes, recycling endosomes, and at the time of hypodermal cell fus…	11.06	Y		Y	ENSG00000070831	CDC42	Small GTPase superfamily
WBGene00015512	mthf-1	mthf-1 encodes a gene that is orthologous to human methylenetetrahydrofolate reductase (MTHFR), based on sequence comparison; mthf-1 is among several genes that are upregulated in a gene expression profiling study of the oxidative stress response of aak-2 (homolog of alpha-subunit of AMP-activated protein kinase) mutants.	11.05				ENSG00000177000	MTHFR	Methylenetetrahydrofolate reductase
WBGene00021595	Y46E12BL.2	none available	11.03				ENSG00000052749	RRP12	Armadillo-like helical
WBGene00013081	Y51A2D.14	none available	11.03	Y	Y		n/a	n/a	n/a
WBGene00009915	F52A8.1	none available	11.01	Y			n/a	n/a	n/a
WBGene00011687	T10C6.5	none available	11.01	Y			ENSG00000150316	CWC15	Pre-mRNA-splicing factor Cwf15/Cwc15
WBGene00011688	T10C6.6	none available	11.01	Y			ENSG00000160190	SLC37A1	Sugar phosphate transporter
WBGene00022059	Y67D8A.2	Y67D8A.2 encodes a protein orthologous to human Phosphorylase kinase, beta subunit,(PHKB); human phosphorylase kinase is a polymer of 16 subunits, and catalyses serine phosphorylation of substrates, including troponin I.	11.01	Y			ENSG00000102893	PHKB	Phosphorylase kinase alpha/beta subunit
WBGene00012144	T28H10.3	none available	11	Y			ENSG00000100600	LGMN	Peptidase C13, legumain
WBGene00009712	F44G4.2	none available	10.98	Y	Y		n/a	n/a	n/a
WBGene00010640	K07F5.16	none available	10.97				ENSG00000108176	DNAJC12	DnaJ domain
WBGene00009342	fasn-1	fasn-1 encodes a fatty acid synthase, orthologous to human FASN (OMIM:600212); CEP-1 is required for fully normal fasn-1 expression in vivo; CEP-1 drives transcription of luciferase reporters whose promoters contains either of two putative CEP-1 binding sites (FAS-T1 and FAS-T2) found in the fasn-1 gene, and this activity is partially lost by mutation of conserved CEP-1 residues (R298 or H310); i…	10.96	Y		Y	ENSG00000169710	FASN	Thioesterase
WBGene00012679	Y39B6A.18	none available	10.96				n/a	n/a	n/a
WBGene00012732	Y40B1A.1	none available	10.95				n/a	n/a	n/a
WBGene00015531	C06E4.2	none available	10.94			Y	n/a	n/a	n/a
WBGene00010953	clec-190	none available	10.93				n/a	n/a	n/a
WBGene00010509	K02E2.8	none available	10.93		Y	Y	n/a	n/a	n/a
WBGene00003476	mtm-3	mtm-3 encodes, by alternative splicing, two isoforms of a myotubularin lipid phosphatase orthologous to human MTMR3 and MTMR4 and paralogous to MTM1; MTM-3 is required for normal locomotion in older adults and for normally long lifespan; MTM-3 has phosphatidylinositol 3-phosphate (PI3P) phosphatase activity; MTM-3 contains a C-terminal FYVE domain that binds PI3P in vitro; MTM-3 is expressed thro…	10.93	Y			ENSG00000108389	MTMR4	FYVE zinc finger
WBGene00001099	dsc-4	dsc-4 encodes the C. elegans ortholog of the large subunit of the microsomal triglyceride transfer protein; dsc-4 affects the length of the defecation cycle and genetically interacts with clk-1 with respect to defecation cycle length, and also with respect to the clk-1- dependent adjustment of defecation cycle length to temperature; a DSC-4::GFP fusion protein is expressed in the intestine beginn…	10.92				n/a	n/a	n/a
WBGene00017563	F18C5.10	none available	10.92	Y			n/a	n/a	n/a
WBGene00004987	spp-2	spp-2 encodes an antimicrobial peptide that belongs to the SPP-protein family, called caenopores, with structural similarity to saposin-like proteins (SAPLIPs), the amoebapores and the mammalian NK-lysin and granulysin; caenopores are part of the worm"s innate immune system and interact with and eliminate bacteria via membrane pore-forming activity; C. elegans has at least 33 putative SPP protein…	10.92	Y			n/a	n/a	n/a
WBGene00014023	lnkn-1	lnkn-1 encodes a conserved, single-pass type I transmembrane glycoprotein with seven atypical FG-GAP domains in the extracellular domain, which potentially folds into a beta-propeller structure resembling the alpha-integrin ligand-binding domain; LNKN-1 is necessary for attachment of the male linker cell to the developing vas deferens and thus for normal male gonad migration; LNKN-1 is also requi…	10.91	Y			ENSG00000129636	ITFG1	T-cell immunomodulatory protein
WBGene00006888	vbh-1	vbh-1 encodes a DEAD-box RNA helicase with similarity to Drosophila Vasa and Belle; vbh-1 activity is required for the proper timing of the sperm-oocyte switch during germ line development; vbh-1 also plays a role in embryonic development; in regulating germ line development, vbh-1 appears to function at least partially redundantly with laf-1, which also encodes a DEAD-box RNA helicase; VBH-1 is …	10.91	Y			ENSG00000152670	DDX4	Helicase, C-terminal
WBGene00014022	ZK637.2	none available	10.91	Y			ENSG00000232830	n/a	Protein of unknown function DUF842, eukaryotic
WBGene00012550	hpo-21	none available	10.9				ENSG00000118363	SPCS2	Signal peptidase complex subunit 2
WBGene00012602	Y38E10A.24	none available	10.9	Y			n/a	n/a	n/a
WBGene00016088	clec-266	none available	10.89	Y			ENSG00000256660	CLEC12B	C-type lectin
WBGene00000818	csn-6	csn-6 encodes a homolog of COP9 signalosome complex subunit 2 that affects embryonic viability and fertility.	10.87				ENSG00000168090	COPS6	JAB1/MPN/MOV34 metalloenzyme domain
WBGene00017780	F25E2.2	none available	10.87				n/a	n/a	n/a
WBGene00002196	kin-10	kin-10 encodes a putative regulatory (beta) subunit of casein kinase II required for both viability and male mating behavior, the latter of which probably reflects activation of LOV-1 and PKD-2 by KIN-10; KIN-10 is orthologous to human CSNK2B (LY6G5B; OMIM:610433); a C-terminal domain of KIN-10 (residues 109-174) bind the PLAT domain of LOV-1 in two-hybrid and GST pulldown assays, and KIN-10 colo…	10.87	Y			ENSG00000263020	n/a	Casein kinase II, regulatory subunit
WBGene00013464	Y67H2A.7	none available	10.87				ENSG00000027001	MIPEP	Peptidase M3A/M3B
WBGene00015137	B0310.1	B0310.1 encodes a nematode-specific transmembrane protein; loss of B0310.1 activity via RNAi results in reduced fat content in wild-type and tub-1 mutant animals, suggesting that B0301.1 plays a role in lipid metabolism.	10.86	Y	Y		n/a	n/a	n/a
WBGene00011819	hal-2	none available	10.86				n/a	n/a	n/a
WBGene00011814	T16H12.4	none available	10.86				ENSG00000226259	n/a	von Willebrand factor, type A
WBGene00014172	clpp-1	clpp-1 encodes a mitochondrial protein, homologous to bacterial ClpP, required to initiate the stress response to unfolded mitochondrial proteins; as with its bacterial ortholog, CLPP-1 is predicted to be a proteolytic subunit of a Clp-like protease, with an N-terminal region required for mitochondrial localization, and a C-terminal region of ClpP similarity; in response to a mutation stressing m…	10.85				ENSG00000125656	CLPP	ATP-dependent Clp protease proteolytic subunit
WBGene00010139	F56A8.3	none available	10.84		Y	Y	ENSG00000108829	LRRC59	Leucine-rich repeat
WBGene00018701	pccb-1	F52E4.1 is orthologous to the human gene PROPIONYL-CoA CARBOXYLASE, BETA SUBUNIT (PCCB; OMIM:232050), which when mutated leads to propionicacidemia; F52E4.1 protein is predicted to be mitochondrial.	10.84	Y			ENSG00000114054	PCCB	Carboxyl transferase
WBGene00010500	K02B12.7	none available	10.83				ENSG00000101199	ARFGAP1	Arf GTPase activating protein
WBGene00003747	nlp-9	none available	10.81				n/a	n/a	n/a
WBGene00000729	col-156	none available	10.79				ENSG00000133661	SFTPD	Nematode cuticle collagen, N-terminal
WBGene00022351	Y82E9BR.19	none available	10.79				n/a	n/a	n/a
WBGene00016435	C35B1.5	none available	10.78	Y			ENSG00000171773	NXNL1	Thioredoxin-like fold
WBGene00002015	hsp-16.1	hsp-16.1 encodes a 16-kD heat shock protein (HSP) that is a member of the hsp16/hsp20/alphaB-crystallin (HSP16) family of heat shock proteins, and that is identical to the protein encoded by hsp-16.11; an hsp-16.1 reporter fusion, expressed broadly but most strongly in muscle and hypodermis, is induced solely in response to heat shock or other environmental stresses; expression is detectable in s…	10.78	Y		Y	ENSG00000276076	n/a	Alpha crystallin/Heat shock protein
WBGene00014249	ZK1307.8	none available	10.78			Y	ENSG00000130175	PRKCSH	EF-hand domain
WBGene00022678	sar-1	none available	10.77	Y			ENSG00000079332	SAR1A	Small GTP-binding protein domain
WBGene00000663	col-88	none available	10.75				ENSG00000133661	SFTPD	Nematode cuticle collagen, N-terminal
WBGene00017984	F32D1.5	none available	10.75				ENSG00000137198	GMPR	IMP dehydrogenase/GMP reductase
WBGene00003815	nars-1	nars-1 encodes an asparaginyl-tRNA synthetase that is required for embryonic viability and fertility.	10.74				ENSG00000137513	NARS2	Aspartyl/Asparaginyl-tRNA synthetase, class IIb
WBGene00003955	pcn-1	pcn-1 encodes the C. elegans ortholog of proliferating cell nuclear antigen (PCNA), an acidic protein that is an essential component of the DNA replication and repair machinery and serves as a processivity factor for DNA polymerase delta; PCN-1 is required for early embryogenesis and for proper germ-line development, and directly interacts with CKI-2, a cyclin-dependent kinase inhibitor homolog t…	10.74	Y			ENSG00000132646	PCNA	Proliferating cell nuclear antigen, PCNA
WBGene00011735	hip-1	none available	10.73	Y	Y		ENSG00000212789	n/a	Heat shock chaperonin-binding
WBGene00012894	tbc-17	none available	10.73	Y			ENSG00000278599	TBC1D3E	Rab-GTPase-TBC domain
WBGene00012782	Y43C5A.2	none available	10.7			Y	ENSG00000171819	ANGPTL7	Fibrinogen, alpha/beta/gamma chain, C-terminal globular domain
WBGene00016769	C49C8.5	none available	10.69			Y	ENSG00000171819	ANGPTL7	Fibrinogen, alpha/beta/gamma chain, C-terminal globular domain
WBGene00007455	ugt-22	none available	10.66				ENSG00000278216	UGT2A3	UDP-glucuronosyl/UDP-glucosyltransferase
WBGene00004830	slo-1	slo-1 encodes a voltage- and calcium-activated potassium (BK) channel; SLO-1 activity is required for muscle inactivation: mutants have wild-type levels of motor activity, but have less smooth movement and tend to stop and reverse direction; SLO-1 is expressed in neurons and in body wall and vulval muscle; SLO-1 localization in proximity to the EGL-19 L-type calcium channel in muscle membrane is …	10.65				ENSG00000215262	KCNU1	Potassium channel, calcium-activated, BK, alpha subunit
WBGene00021936	Y55F3BL.2	none available	10.64				ENSG00000141424	SLC39A6	Zinc/iron permease
WBGene00000868	cyb-3	cyb-3 encodes one of four C. elegans cyclin B family members that is most closely related to the B3-type cyclins; cyb-3 is required for a number of dynein-related mitotic processes and specifically for initiation of anaphase chromosome segregation; cyb-3 is also required for completion of meiosis II and proper pronuclear migration, centrosome maturation, and pronuclear condensation in the fertili…	10.63	Y			ENSG00000147082	CCNB3	Cyclin, C-terminal domain
WBGene00017073	D2096.6	none available	10.63				n/a	n/a	n/a
WBGene00011734	mlc-5	mlc-5 encodes a protein containing two EF-hand domains that is the C. elegans myosin II essential light chain ortholog; MLC-5 activity is required for cytokinesis and for epithelial morphogenesis during embryonic elongation; a GFP::MLC-5 fusion protein is expressed during embryogenesis in the lateral hypodermal seam cells as well as in the dorsal and ventral hypodermal cells where it exhibits co-…	10.61				ENSG00000198336	MYL4	EF-hand domain
WBGene00009812	suca-1	none available	10.61	Y			ENSG00000172340	SUCLG2	Succinyl-CoA synthetase, beta subunit
WBGene00006391	taf-9	none available	10.61	Y			ENSG00000276463	TAF9	Transcription initiation factor TAFII31
WBGene00000204	arx-6	arx-6 also called as p20Arc p21Arc encodes a subunit of the actin related protein of the conserved Arp2/3 complex, with 60% amino acid similarity with the homologous genes from human (OMIM:604226); arx-6 is an essential gene as disruption in the expression by RNAi results in embryonic arrest due to ventral enclosure during morphogenesis; Arp2/3 depletion results in partial shrinking of the Ea/p a…	10.6	Y			ENSG00000241553	ARPC4	Actin-related protein 2/3 complex subunit 4
WBGene00016439	C35D10.1	none available	10.6	Y			ENSG00000134153	EMC7	Domain of unknown function DUF2012
WBGene00000618	col-41	col-41 encodes a cuticle collagen.	10.6				ENSG00000133661	SFTPD	Nematode cuticle collagen, N-terminal
WBGene00022379	Y94H6A.7	none available	10.6				ENSG00000143727	ACP1	Protein-tyrosine phosphatase, low molecular weight, mammalian
WBGene00022380	Y94H6A.8	none available	10.6				ENSG00000184752	NDUFA12	NADH dehydrogenase [ubiquinone] 1 alpha subcomplex subunit 12
WBGene00015776	dct-1	dct-1 encodes a protein with similarity to the mammalian BNIP3 proteins that interact with Bcl-2 and the Adenovirus E1B 19kDa protein and that have been shown to have pro-apoptotic activity; loss of dct-1 activity via RNAi in daf-2 mutants and in gld-1; daf-2 doubly mutant animals indicates that dct-1 can function to regulate both lifespan and tumor cell proliferation; when expressed in mammalian…	10.58	Y			ENSG00000104765	BNIP3L	BNIP3
WBGene00007024	plin-1	none available	10.55	Y	Y		n/a	n/a	n/a
WBGene00016746	C48B6.10	none available	10.54	Y		Y	n/a	n/a	n/a
WBGene00013171	Y53F4B.25	none available	10.54				n/a	n/a	n/a
WBGene00001980	hmr-1	hmr-1 encodes two isoforms of a classical cadherin that contain extracellular cadherin, EGF-like, and laminin G domains as well as a highly conserved intracellular domain that binds beta-catenin; by homology, the HMR-1 proteins are predicted to function as calcium-dependent, homophilic cell-cell adhesion receptors; in vivo, HMR-1A activity is required for mediating the cell migrations, cell shape…	10.53	Y			ENSG00000107736	CDH23	Cadherin, cytoplasmic domain
WBGene00004373	rme-1	rme-1 encodes a conserved, EPS15 homology (EH) domain-containing protein; RME-1 is required for endocytosis, specifically for modulating endocytic transport through the endosomal recycling compartment (ERC); RME-1 is ubiquitously expressed and, in the polarized intestinal epithelium, is found on basolateral recycling endosomes.	10.52	Y			ENSG00000024422	EHD2	EH domain
WBGene00010697	uda-1	none available	10.51	Y			ENSG00000197586	ENTPD6	Nucleoside phosphatase GDA1/CD39
WBGene00006768	unc-32	unc-32 encodes, by alternative splicing, six isoforms of an ortholog of subunit a of the membrane-bound (V0) domain of vacuolar proton-translocating ATPase (V-ATPase); UNC-32 is orthologous to human ATP6N1A (OMIM:192130), ATP6V0A2, ATP6V0A4 (OMIM:605239, mutated in distal renal tubular acidosis), and TCIRG1 (OMIM:604592, mutated in osteopetrosis); one UNC-32 isoform is essential for locomotion an…	10.5	Y			ENSG00000185344	ATP6V0A2	V-type ATPase, V0 complex, 116kDa subunit family
WBGene00010727	K09G1.1	none available	10.49	Y			n/a	n/a	n/a
WBGene00000869	cyc-1	cyc-1 encodes a component of complex III ( cytochrome c reductase) required for normal ATP production; reduction of ATP production by cyc-1(RNAi) decreases growth rate and body size, slows behavior, and increases lifespan; cyc-1 encodes a protein predicted by Eisenberg and coworkers, with 52% accuracy, to be mitochondrial	10.48				ENSG00000179091	CYC1	Cytochrome c1
WBGene00020268	hpo-19	The T05H4.5 gene encodes an ortholog of the human gene NADH-CYTOCHROME B5 REDUCTASE (DIA1), which when mutated leads to methemoglobinemia (OMIM:250800).	10.48				ENSG00000166394	CYB5R2	Oxidoreductase FAD/NAD(P)-binding
WBGene00010260	ddx-17	none available	10.47	Y			ENSG00000108654	DDX5	Helicase, C-terminal
WBGene00010070	nep-17	nep-17 encodes a neprilysin; neprilysins are thermolysin-like zinc metallopeptidases, found on the outer surface of animal cells, that negatively regulate small signalling peptides (e.g., enkephalin, tachykinin, insulin, and natriuretic peptides) by cleaving them; NEP-17 has no clear orthologs in other organisms.	10.47	Y			ENSG00000197993	KEL	Peptidase M13
WBGene00012718	dhhc-8	none available	10.46				ENSG00000156599	ZDHHC5	Zinc finger, DHHC-type, palmitoyltransferase
WBGene00001077	dpy-18	dpy-18 encodes a catalytic alpha subunit of collagen prolyl 4-hydroxylase (P4H) orthologous to human P4H alpha (I) isoform (OMIM: 176710), an alpha subunit of prolyl-4-hydroxylase which is a procollagen modifying enzyme required for exoskeleton formation, morphogenesis and maintenance of body shape; dpy-18 has a critical role in hydroxylation of cuticle collagens during collagen synthesis; dpy-18…	10.46				ENSG00000072682	P4HA2	Oxoglutarate/iron-dependent dioxygenase
WBGene00021305	oig-6	none available	10.45			Y	ENSG00000172270	BSG	Immunoglobulin subtype 2
WBGene00002981	lgg-2	lgg-2 encodes an ortholog of the autophagic budding yeast protein Atg8p; LGG-2 is also homologous the light chain 3 (LC3) subunit of the microtubule-associated proteins 1A and 1B (MAP1A and MAP1B); LGG-2 is predicted to associate with MAP1A and MAP1B and with microtubules and to perhaps play a role in regulating the microtubule-binding activity of MAP1A and MAP1B; LGG-2 has no obvious function in…	10.44	Y			ENSG00000197769	MAP1LC3C	Autophagy protein Atg8 ubiquitin-like
WBGene00021035	W05F2.3	none available	10.44	Y			n/a	n/a	n/a
WBGene00017100	E02H9.2	none available	10.43				n/a	n/a	n/a
WBGene00012404	Y6G8.2	none available	10.43				n/a	n/a	n/a
WBGene00019465	acl-14	none available	10.42	Y			ENSG00000123684	LPGAT1	Phospholipid/glycerol acyltransferase
WBGene00018572	lin-42	lin-42 encodes three PAS domain-containing proteins orthologous to insect and vertebrate Period proteins that function in regulation of circadian rhythms; during larval development, lin-42 functions in the heterochronic pathway to regulate developmental switches that occurs in multiple tissues, including the hypodermis, gonad, sex myoblasts, and vulva; genetic analysis suggests that, in the hypod…	10.42				ENSG00000179094	PER1	PAS domain
WBGene00021764	Y51F10.3	none available	10.42				n/a	n/a	n/a
WBGene00004894	sms-3	none available	10.41				ENSG00000198964	SGMS1	Sphingomyelin synthase-like domain
WBGene00020399	ztf-4	none available	10.4			Y	n/a	n/a	n/a
WBGene00006863	gyg-1	none available	10.39	Y	Y		ENSG00000163754	GYG1	Glycosyl transferase, family 8
WBGene00002061	ife-3	ife-3 encodes one of five C. elegans homologs of the mRNA cap-binding protein eIF4E; by homology, IFE-3 is predicted to bind capped mRNA and mediate its recruitment to ribosomes during translation initiation; in vitro, IFE-3 binds a monomethylated guanosine cap structure but does not bind a trimethylated guanosine cap, which suggests that IFE-3 likely mediates translation of those mRNAs that do n…	10.39				ENSG00000175766	EIF4E1B	Translation Initiation factor eIF- 4e
WBGene00004128	pqn-41	The protein product of this gene is predicted to contain a glutamine/asparagine (Q/N)-rich ("prion") domain, by the algorithm of Michelitsch and Weissman (as of the WS77 release of WormBase, i.e., in wormpep77).	10.38	Y			n/a	n/a	n/a
WBGene00021849	Y54F10AM.5	none available	10.38				ENSG00000119421	NDUFA8	NADH dehydrogenase [ubiquinone] (complex I), alpha subcomplex, subunit 8
WBGene00003794	npp-8	none available	10.37	Y			ENSG00000113569	NUP155	Nucleoporin, Nup155-like
WBGene00004858	sma-4	sma-4 encodes a Smad protein and a homolog of human DPC4, which when mutated leads to pancreatic carcinoma (OMIM:260350); SMA-4 is similar to members of the vertebrate protein family of Dwarfins; during development, sma-4 functions as part of a DBL-1/SMA-6 TGF-beta-related signaling pathway that controls body size and male tail sensory ray and spicule formation; sma-4, through this pathway, also …	10.36	Y		Y	ENSG00000141646	SMAD4	SMAD domain, Dwarfin-type
WBGene00013354	snx-6	none available	10.35				ENSG00000089006	SNX5	Phox homologous domain
WBGene00000683	col-109	col-109 encodes a cuticular collagen; loss of col-109 via large-scale RNAi screens results in no obvious defects.	10.34				n/a	n/a	n/a
WBGene00021691	Y48G8AL.13	none available	10.34				ENSG00000185561	TLCD2	TRAM/LAG1/CLN8 homology domain
WBGene00008019	C38H2.2	C38H2.2 encodes a core 1 UDP-Gal:GalNAcalpha1-Ser/Thr beta1,3-galactosyltransferase (core 1 beta3-Gal-T or T-synthase, EC2.4.1.122); C38H2.2 protein is predicted to be primarily extracellular, with an N-terminal transmembrane domain; C38H2.2 shares 6 conserved cysteine residues with all known T-synthases, and is ubiquitously expressed; enzymatically active C38H2.2 can be generated from insect but…	10.33	Y			ENSG00000106392	C1GALT1	Fringe-like
WBGene00007560	C14A4.9	none available	10.32				n/a	n/a	n/a
WBGene00016258	vha-16	vha-16 encodes an an ortholog of subunit d of the membrane-bound (V0) domain of vacuolar proton-translocating ATPase (V-ATPase); VHA-16 is predicted to mechanically anchor the V-ATPase cytosolic rotor (stalk) to the membrane, while also providing a hub for the V-ATPase transmembrane rotor; vha-16 is expressed in diverse tissues (e.g., excretory cell, pharynx, intestine, hypodermis, and neurons).	10.32	Y			ENSG00000147614	ATP6V0D2	ATPase, V0 complex, c/d subunit
WBGene00003163	mdl-1	mdl-1 encodes a basic helix-loop-helix (bHLH) protein similar to the vertebrate MAD transcriptional regulators; in vitro, MDL-1 can heterodimerize, and bind an E-box DNA sequence, with MXL-1, a C. elegans MAX-like bHLH protein; when expressed in rat embryonic fibroblasts, MDL-1 is able to suppress c-MYC/RAS-induced cell transformation, in a manner dependent upon an intact, predicted SIN3 interact…	10.31	Y	Y		ENSG00000213347	MXD3	Myc-type, basic helix-loop-helix (bHLH) domain
WBGene00021545	Y43H11AL.1	none available	10.3				ENSG00000168556	ING2	Zinc finger, PHD-type
WBGene00002783	let-607	let-607 encodes an ortholog of the Cyclic AMP-responsive Element-Binding (CREB) family of transcription factors.	10.29	Y			ENSG00000157613	CREB3L1	Basic-leucine zipper domain
WBGene00006624	try-6	none available	10.29	Y			ENSG00000282049	PRSS2	Serine proteases, trypsin domain
WBGene00012468	Y17G7B.17	none available	10.29	Y			ENSG00000178053	MLF1	Myeloid leukemia factor
WBGene00004096	pqm-1	pqm-1 encodes a C2H2-type zinc finger and leucine zipper-containing protein that is upregulated in response to oxidative stress induced by paraquat treatment; PQM-1 may function as a stress-responsive transcription factor.	10.28				n/a	n/a	n/a
WBGene00006804	unc-71	unc-71 encodes an ADAM, a disintegrin and metalloprotease-containing transmembrane protein that is a member of the metzincin superfamily of proteases; UNC-71 is required non-cell autonomously for motor axon guidance and sex myoblast migration; UNC-71 does not appear to have an active metalloprotease domain, but functions with UNC-6/netrin and integrins INA-1/PAT-3 to provide guidance cues during …	10.28			Y	ENSG00000275594	ADAM32	Peptidase M12B, ADAM/reprolysin
WBGene00021048	W05H9.1	none available	10.28	Y			n/a	n/a	n/a
WBGene00011474	aldo-1	aldo-1 is orthologous to the human gene ALDOLASE A, FRUCTOSE-BISPHOSPHATE (ALDOA; OMIM:103850), which when mutated leads to aldolase A deficiency.	10.27	Y	Y		ENSG00000149925	ALDOA	Fructose-bisphosphate aldolase, class-I
WBGene00003003	lin-14	lin-14 encodes a novel protein whose activity is required for specifying the division timings of a specific group of cells during postembryonic development; lin-14 loss-of-function mutations result in the premature appearance of later larval lineages, while gain-of-function mutations result in reiteration of L1 larval stages lineages; in addition, lin-14 acts as a positive regulator of AVM, PVM, …	10.27	Y		Y	n/a	n/a	n/a
WBGene00013882	ZC410.5	none available	10.26	Y			n/a	n/a	n/a
WBGene00006494	hke-4.2	none available	10.25				ENSG00000229802	SLC39A7	Zinc/iron permease
WBGene00020269	erfa-1	none available	10.24				ENSG00000120705	ETF1	Peptide chain release factor eRF1/aRF1
WBGene00017327	F10C1.8	none available	10.24	Y			ENSG00000176619	LMNB2	Lamin Tail Domain
WBGene00020237	phat-4	none available	10.23	Y			n/a	n/a	n/a
WBGene00021036	W05F2.4	none available	10.23	Y			n/a	n/a	n/a
WBGene00013986	ZK512.7	none available	10.23				n/a	n/a	n/a
WBGene00003164	mdt-6	mdt-6 encodes a highly conserved transcriptional mediator of the Med6 family that includes Saccharomyces cerevisiae Med6 and human MED6 (OMIM:602984); MDT-6 is an essential gene required maternally for embryogenesis and zygotically for postembryonic transcriptional regulation of genes involved in the Ras and Wnt signaling pathways that mediate vulval and male tail formation, respectively; mdt-6 i…	10.22		Y		ENSG00000133997	MED6	Mediator complex, subunit Med6
WBGene00021959	Y57E12AL.6	none available	10.22				n/a	n/a	n/a
WBGene00001749	gst-1	gst-1 encodes a putative glutathione S-transferase of the pi class; GST-1 is required for sperm to normally migrate towards a PUFA-based signal exuded by oocytes; gst-1(RNAi) hermaphrodites are infertile, both through aberrant loss of their own sperm and through failure of males to effectively inseminate them.	10.21	Y		Y	ENSG00000213366	GSTM2	Glutathione S-transferase, Pi class
WBGene00009897	skpo-1	none available	10.21				ENSG00000167419	LPO	ShKT domain
WBGene00020155	T02B11.3	none available	10.21				n/a	n/a	n/a
WBGene00001735	grl-26	grl-26 encodes a hedgehog-like protein, with an N-terminal signal sequence, a central low-complexity region, and a C-terminal Ground-like (Grl) domain; the Grl domain is predicted to form a cysteine-crosslinked protein involved in intercellular signalling, and it has subtle similarity to the N-terminal Hedge domain of HEDGEHOG proteins.	10.2				n/a	n/a	n/a
WBGene00002054	ifb-2	ifb-2 encodes an intermediate filament protein; IFB-2 is expressed exclusively in the intestine and functions as a structural component of the intestinal terminal web; within the terminal web, IFB-2 localizes to a discrete substructure known as the endotube.	10.2	Y			ENSG00000175084	DES	Lamin Tail Domain
WBGene00021088	W08E12.7	none available	10.2	Y			ENSG00000257411	n/a	Peptidase M24, structural domain
WBGene00021895	clec-84	none available	10.19				n/a	n/a	n/a
WBGene00007330	C05C10.3	C05C10.3 is orthologous to the human gene 3-OXOACID COA TRANSFERASE (also called succinyl-CoA:3-ketoacid CoA transferase; OXCT; OMIM:245050), which when mutated leads to episodic ketoacidosis.	10.18				ENSG00000198754	OXCT2	Coenzyme A transferase family I
WBGene00003086	lst-4	lst-4 encodes multiple isoforms of a sorting nexin that are the sole C. elegans members of the SNX9 family of sorting nexins ; activity of the SH3 domain-containing LST-4 isoforms is required for regulation of phagosome maturation during apoptotic cell corpse clearance, specifically for regulating phagosomal fusion with endosomes and lysosomes; LST-4 physically interacts with the DYN-1/dynamin GT…	10.18	Y		Y	ENSG00000130340	SNX9	SH3 domain
WBGene00022410	Y97E10C.1	none available	10.18	Y			n/a	n/a	n/a
WBGene00003056	lon-2	lon-2 encodes a member of the glypican family of heparan sulfate proteoglycans; during development, lon-2 activity is required in the hypodermis for negative regulation of the DBL-1/BMP signaling pathway that regulates body length; genetic analyses indicate that lon-2 functions upstream of dbl-1, and in vitro studies show that LON-2 can bind mammalian BMP2, suggesting that LON-2 may directly inte…	10.17				n/a	n/a	n/a
WBGene00001333	erm-1	erm-1 encodes the C. elegans ortholog of the ERM (Ezrin, Radixin, Moesin) family of cytoskeletal linkers; ERM-1 activity is required for regulating LET-23/EGFR receptor localization in the vulval cell lineages to effect proper temporal regulation of Ras-mediated EGF signaling.	10.16	Y			ENSG00000137710	RDX	Ezrin/radixin/moesin-like
WBGene00012733	Y40B1A.2	none available	10.14				n/a	n/a	n/a
WBGene00018785	F54A3.6	none available	10.13				n/a	n/a	n/a
WBGene00007353	C06A1.2	none available	10.12		Y		n/a	n/a	n/a
WBGene00006840	unc-116	unc-116 encodes a kinesin-1 heavy chain ortholog; UNC-116 is predicted to function as an anterograde microtubule-based motor and its activity is required for transport and localization of synaptic vesicle components and thus for normal locomotion and larval development; in addition, unc-116 is required for normal early translocation of the meiotic spindle to the oocyte cortex, cortical positionin…	10.08	Y			ENSG00000168280	KIF5C	Kinesin motor domain
WBGene00044026	cisd-1	none available	10.07				ENSG00000145354	CISD2	Iron sulphur-containing domain, CDGSH-type
WBGene00001101	dsh-1	dsh-1 encodes a homolog of Drosophila DISHEVELED and a paralog of MIG-5 (and DSH-2); DSH-1 appears to be required for Wnt-induced endoderm specification in the EMS blastomere, and may influence HSN migration as well; DSH-1, along with LIN-17, CAM-1, and CWN-2, functions as part of a Wnt signaling pathway that regulates ACR-16 localization to postsynaptic regions, a key component of activity-depen…	10.07	Y			ENSG00000150764	DIXDC1	DEP domain
WBGene00021317	Y32H12A.9	none available	10.05				n/a	n/a	n/a
WBGene00010075	F55A11.1	none available	10.04	Y		Y	ENSG00000180398	MCFD2	EF-hand domain
WBGene00000722	col-149	none available	10.02				ENSG00000133661	SFTPD	Nematode cuticle collagen, N-terminal
WBGene00004959	spe-5	spe-5 encodes an ortholog of subunit B of the cytoplasmic (V1) domain of vacuolar proton-translocating ATPase (V-ATPase); spe-5 was identified in screens for mutations that result in defective spermatogenesis; defined by six cold-sensitive alleles, spe-5 is required for morphogenesis of the Golgi-derived fibrous body-membranous organelle (FB-MO) complex that is essential for the second, asymmetri…	10.02				ENSG00000116039	ATP6V1B1	ATPase, F1/V1/A1 complex, alpha/beta subunit, nucleotide-binding domain
WBGene00006591	toh-1	toh-1 encodes an astacin-like metalloprotease; TOH-1 is predicted to function as a secreted protease; experiments that specifically assessed toh-1"s role in molting indicate that toh-1(RNAi) causes no abnormal phenotypes.	10.01			Y	ENSG00000141434	MEP1B	CUB domain
WBGene00017772	clec-1	none available	9.99	Y			n/a	n/a	n/a
WBGene00009142	F26A3.4	none available	9.99	Y	Y		ENSG00000276023	DUSP14	Dual specificity phosphatase, catalytic domain
WBGene00010790	sodh-1	none available	9.99	Y			n/a	n/a	n/a
WBGene00012868	tbc-9	none available	9.99			Y	ENSG00000204634	TBC1D8	Rab-GTPase-TBC domain
WBGene00000113	alh-7	alh-7 encodes an ortholog of the human gene DJ73M23.2 (NAD+-DEPENDENT SUCCINIC SEMIALDEHYDE DEHYDROGENASE; ALDH5A1), which when mutated leads to SSADH deficiency (OMIM:271980).	9.98	Y			ENSG00000112294	ALDH5A1	Aldehyde dehydrogenase domain
WBGene00009739	F45H10.2	none available	9.98	Y			ENSG00000164405	UQCRQ	Cytochrome b-c1 complex subunit 8
WBGene00002017	hsp-16.11	hsp-16.11 encodes a 16-kD heat shock protein (HSP) that is a member of the hsp16/hsp20/alphaB-crystallin (HSP16) family of heat shock proteins, and that is identical to the protein encoded by hsp-16.1; hsp-16.11 expression is induced in response to heat shock or other environmental stresses; HSP-16.11 is likely to function as passive ligand temporarily preventing unfolded proteins from aggregatin…	9.98	Y			ENSG00000276076	n/a	Alpha crystallin/Heat shock protein
WBGene00019619	asp-14	asp-14 encodes an aspartyl protease.	9.96				ENSG00000186318	BACE1	Aspartic peptidase A1 family
WBGene00019620	fah-1	fah-1 encodes a putative fumarylacetoacetate hydrolase, orthologous to human FAH (OMIM:276700, mutated in type I tyrosinemia), that is required for tyrosine metabolism, resistance to oxidative and protein-folding stresses, and more generally for normally rapid growth, normal locomotion, fertility, and viability; fah-1 is expressed in hypodermis and intestine; the intestines of fah-1(RNAi) animals…	9.96				ENSG00000103876	FAH	Fumarylacetoacetase
WBGene00000626	col-49	col-49 encodes a cuticle collagen.	9.95			Y	ENSG00000133661	SFTPD	Nematode cuticle collagen, N-terminal
WBGene00019509	K07H8.9	none available	9.95			Y	ENSG00000131773	KHDRBS3	K Homology domain
WBGene00014058	ZK673.2	none available	9.95	Y			ENSG00000162433	AK4	Adenylate kinase/UMP-CMP kinase
WBGene00002048	ida-1	ida-1 encodes a protein tyrosine phosphatase-like receptor, orthologous to the mammalian type I diabetes autoantigens IA-2 and phogrin that are expressed in dense core vesicles of neuroendocrine tissue and involved in regulated protein secretion; in C. elegans, IDA-1 appears to be required for regulating presynaptic neurotransmission and in particular, for the neuropeptidergic control of egg-layi…	9.94	Y			ENSG00000155093	PTPRN2	PTP type protein phosphatase
WBGene00010742	K10D6.2	K10D6.2 encodes three isoforms of a claudin homolog that may be required for normal cohesion of apical junctions in epithelia; K10D6.2A-C are worm-specific, with obvious homologs only in C. elegans; K10D6.2A-C are required for embryonic viability in mass RNAi assays; claudins are integral membrane proteins with four transmembrane sequences that are found in mammalian tight junctions (TJs), induce…	9.93				n/a	n/a	n/a
WBGene00020208	T04C4.1	none available	9.93	Y			ENSG00000217128	FNIP1	Folliculin-interacting protein family
WBGene00000179	aqp-11	aqp-11 encodes a putative aquaporin with no function in mass RNAi assays, perhaps reflecting genetic redundancy with its paralogs AQP-9 and AQP-10; AQP-11 is orthologous to Drosophila CG12251 and human AQP11 (OMIM:609914), AQP12A (OMIM:609789), and AQP12B.	9.91		Y		n/a	n/a	n/a
WBGene00007197	B0513.5	none available	9.91	Y			ENSG00000277196	n/a	Proline dehydrogenase domain
WBGene00000877	cyn-1	cyn-1 encodes a functional cyclophilin that is predicted to be secreted; cyn-1 expression increases as worms progress from the L1 larval stage to the adult stage; cyn-1 shares an operon with vha-13 and thus might be a previously undescribed V-ATPase component or ancillary protein.	9.91			Y	ENSG00000263464	PPIAL4C	Cyclophilin-type peptidyl-prolyl cis-trans isomerase domain
WBGene00009724	F45D3.4	none available	9.9	Y			n/a	n/a	n/a
WBGene00004258	pyc-1	pyc-1 encodes the C. elegans pyruvate carboxylase ortholog; by homology, PYC-1 is predicted to function as a key regulatory enzyme of gluconeogenesis, lipogenesis, and anaplerosis, localizing to the mitochondrial matrix and catalyzing the formation of oxaloacetate from pyruvate and carbonate; pyc-1 expression is induced upon exposure of C. elegans to cadmium.	9.9	Y	Y		ENSG00000175198	PCCA	Biotin/lipoyl attachment
WBGene00011573	anmt-3	none available	9.87	Y	Y		ENSG00000141744	PNMT	Methyltransferase, NNMT/PNMT/TEMT
WBGene00017067	D2092.6	none available	9.86				n/a	n/a	n/a
WBGene00001178	egl-9	egl-9 encodes a proline hydroxylase; EGL-9 functions in a conserved hypoxia-sensing pathway to negatively regulate HIF-1 (hypoxia inducible factor) by hydroxylating prolyl HIF-1 residues; EGL-9 activity is negatively regulated by its physical association with CYSL-1, a protein with similarity to cysteine synthases that acts to transduce information about the environmental O2 levels through H2S (h…	9.85	Y		Y	ENSG00000268797	n/a	Zinc finger, MYND-type
WBGene00000201	arx-3	arx-3 also called as p41Arc encodes a subunit of the actin related protein of the conserved Arp2/3 complex, with 60% amino acid similarity with the homologous genes from human (OMIM: 604223); arx-3 is an essential gene as disruption in the expression by RNAi results in embryonic arrest due to ventral enclosure during morphogenesis; Arp2/3 depletion results in partial shrinking of the Ea/p apical …	9.82				ENSG00000284292	n/a	WD40 repeat
WBGene00015759	C14C6.5	C14C6.5 encodes a protein that contains a Metridin-like ShK toxin domain; C14C6.5 is involved in the transcriptional, innate immune response towards several different bacterial pathogens.	9.82	Y			n/a	n/a	n/a
WBGene00013888	nspa-3	none available	9.82				n/a	n/a	n/a
WBGene00004989	spp-4	spp-4 encodes an antimicrobial peptide that belongs to the SPP-protein family, called caenopores, with structural similarity to saposin-like proteins (SAPLIPs), the amoebapores and the mammalian NK-lysin and granulysin; caenopores are part of the worm"s innate immune system and interact with and eliminate bacteria via membrane pore-forming activity; C. elegans has at least 33 putative SPP protein…	9.82			Y	n/a	n/a	n/a
WBGene00007054	scpl-1	scpl-1 encodes, by alternative splicing, two protein isoforms of a putative class-C RNA polymerase II (RNAPII) carboxyl-terminal domain (CTD) phosphatase, orthologous to budding yeast PSR1 and PSR2 and human CTDSP1 (OMIM:605323), CTDSP2 (OMIM:608711, amplified in sarcoma), and CTDSPL (OMIM:608592, deleted in epithelial cancer), and paralogous to C. elegans SCPL-3 and human CTDSPL2; more distantly…	9.81	Y			ENSG00000175215	CTDSP2	FCP1 homology domain
WBGene00021509	Y41D4A.7	none available	9.81	Y			n/a	n/a	n/a
WBGene00001088	dpy-30	The dpy-30 gene encodes an essential nuclear protein required for hermaphrodite dosage compensation as well as normal male development; DPY-30 is expressed ubiquitously throughout development and can be detected in two different multiprotein complexes: the SDC complex involved in dosage compensation and a second complex containing NOX-1 (a WD repeat-containing protein) and ASH-2 (a trithorax-rela…	9.8	Y			ENSG00000162961	DPY30	Dpy-30 motif
WBGene00016115	mdt-26	none available	9.8	Y			n/a	n/a	n/a
WBGene00004910	snf-11	snf-11 encodes an electrogenic, Na[+]/Cl[-]-coupled, high-affinity GABA transporter that is required in vivo for GABA uptake, and for normal aldicarb sensitivity; SNF-11 is orthologous to human SLC6A1 (OMIM:137165); SNF-11 is selective for GABA with a Kt of ~15 microM, has an EC50 value of 168 microM, is blocked by GAT1 inhibitor SKF89976A, and has a 2:1:1 stoichiometry of Na[+]:Cl[-]:GABA; SNF-1…	9.8		Y		ENSG00000198555	n/a	Sodium:neurotransmitter symporter
WBGene00015650	pkg-2	none available	9.79	Y	Y	Y	ENSG00000138669	PRKG2	Cyclic nucleotide-binding domain
WBGene00017244	apy-1	apy-1 encodes a membrane-bound uridine diphosphatase (UDPase, endo-apyrase) orthologous to human CANT1 and paralogous to ZK563.7; APY-1 is required for repression of the unfolded protein response of stressed endoplasmic reticulum (ER), for normally organized pharynx and thin muscle fibers in adults, and for normally high fertility, rapid growth, and long lifespan; apy-1 is transcriptionally activ…	9.78				ENSG00000171302	CANT1	Apyrase
WBGene00011867	chc-1	chc-1 encodes the C. elegans clathrin heavy chain ortholog; loss of chc-1 activity via RNAi results in defects in receptor-mediated yolk endocytosis and thus, embryonic lethality.	9.77	Y			ENSG00000070371	CLTCL1	Clathrin, heavy chain/VPS, 7-fold repeat
WBGene00011871	T20G5.9	none available	9.77			Y	ENSG00000170473	PYM1	WIBG family
WBGene00007787	C27H6.8	none available	9.76			Y	ENSG00000139637	C12orf10	Metal-dependent protein hydrolase
WBGene00003756	nlp-18	nlp-18 encodes four predicted neuropeptide-like proteins; in C. elegans, nlp-18 is part of the FAFA neuropeptide family that also contains nlp-20; nlp-18 is expressed in a variety of neurons, including ASI, NSM, four head neurons, two tail neurons, and two anterior pharyngeal neurons; nlp-18 expression is also detected in the spermatheca, the rectal gland, and the intestine; as loss of nlp-18 act…	9.76	Y			n/a	n/a	n/a
WBGene00006999	zyx-1	zyx-1 encodes a LIM domain protein and is most similar to vertebrate Zyxin; the vertebrate zyxin sub-family also includes migfilin, TRIP6 and LPP; the ZYX-1 protein is expressed in striated body wall muscle and localizes at dense bodies/Z-discs and in the nucleus; ZYX-1 physically interacts with P granule components (GLH proteins) and several dense body and M-line proteins, including DEB-1 (Vincu…	9.76	Y			ENSG00000144791	LIMD1	Zinc finger, LIM-type
WBGene00004384	rnp-1	none available	9.72	Y			ENSG00000248643	RBM14-RBM4	RNA recognition motif domain
WBGene00005020	sqv-2	sqv-2 encodes a glycosaminoglycan galactosyltransferase II, biochemically active in vitro, that is required for cytokinesis of one-cell embryos and for vulval morphogenesis; the common requirement for SQV-2 in both cytokinesis and morphogenesis may be to promote filling an extracellular space with hygroscopic proteoglycans (either in the eggshell, or underneath the L4 cuticle), which in turn may …	9.72				ENSG00000162885	B3GALNT2	Glycosyl transferase, family 31
WBGene00014098	ZK836.2	none available	9.72				ENSG00000197444	OGDHL	Dehydrogenase, E1 component
WBGene00008390	D1086.3	none available	9.71			Y	n/a	n/a	n/a
WBGene00001910	C50F4.6	his-36 encodes an UNSPECIFIED histone.	9.69	Y			n/a	n/a	n/a
WBGene00001262	emb-8	emb-8 encodes the C. elegans NADPH-cytochrome P450 reductase ortholog; by homology, EMB-8 is predicted to function in the enzymatic reduction of the cytochrome P450 monooxygenase enzymes that play a role in fatty acid modification; during embryonic development, emb-8 activity is essential for normal interactions between the pronucleus/centrosome complex and the posterior cortex and thus, for prop…	9.69	Y			ENSG00000127948	POR	Flavodoxin-like
WBGene00021083	W08E12.2	none available	9.69				n/a	n/a	n/a
WBGene00021879	clec-83	none available	9.68				n/a	n/a	n/a
WBGene00003777	nmy-2	nmy-2 encodes a non-muscle myosin II; NMY-2 is required for polarized cytoplasmic flow, polarized distribution of the PAR proteins, cytokinesis, and for proper anterior-posterior polarity in early embryos; NMY-2 functions with PAR-5 in the onset of the establishment phase of polarization in the C. elegans zygote along the anterior-posterior axis, and nmy-2 is partially redundant with nmy-1 with r…	9.68	Y			ENSG00000197616	MYH6	Myosin head, motor domain
WBGene00010117	nkb-3	none available	9.66	Y			ENSG00000186009	ATP4B	Sodium/potassium-transporting ATPase subunit beta
WBGene00021839	nduf-5	Y54E10BL.5 encodes the C. elegans ortholog of the NDUFS5/15 kDa subunit of the mitochondrial NADH dehydrogenase (ubiquinone) complex (complex I).	9.64				ENSG00000168653	NDUFS5	NADH:ubiquinone oxidoreductase, iron-sulphur subunit 5
WBGene00018765	F53F10.3	none available	9.63				ENSG00000143158	MPC2	Mitochondrial pyruvate carrier
WBGene00003951	pbs-5	none available	9.61	Y	Y		ENSG00000236443	PSMB8	Peptidase T1A, proteasome beta-subunit
WBGene00013144	Y53C12B.2	none available	9.61	Y			ENSG00000115946	PNO1	K Homology domain
WBGene00018823	F54E2.1	none available	9.6				n/a	n/a	n/a
WBGene00006626	tsn-1	tsn-1 encodes the C. elegans ortholog of Tudor-SN (tudor staphylococcal nuclease); TSN-1 is a component of the RNA-induced silencing complex (RISC) and its activity is required for proper function of the let-7 miRNA in vivo; TSN-1 is found in both the nucleus and the cytosol.	9.59				ENSG00000197157	SND1	Tudor domain
WBGene00000181	ard-1	ard-1 encodes a homolog of mammalian 3-hydroxyacyl-CoA dehydrogenase (HADH II)/amyloid-beta binding alcohol dehydrogenase (ABAD) that is predicted to be mitochondrial.	9.57				ENSG00000072506	HSD17B10	Short-chain dehydrogenase/reductase SDR
WBGene00000674	col-99	none available	9.57				ENSG00000188517	COL25A1	Collagen triple helix repeat
WBGene00003952	pbs-6	The pbs-6 gene encodes a homolog of mammalian PSMB1.	9.57		Y		ENSG00000008018	PSMB1	Proteasome, subunit alpha/beta
WBGene00001396	fat-4	fat-4 encodes a delta-5 fatty acid desaturase; when expressed heterologously in S. cerevisiae, FAT-4 converts di-homo-gamma-linolenic acid (20:3delta8,11,14) to arachidonic acid (20:4delta5,8,11,14), an important precursor in eicosanoid metabolism, as well as on other fatty acids (C18 to C20); FAT-4 is is required in vivo for delta-5 unsaturated fatty acid synthesis.	9.56	Y			ENSG00000221968	FADS3	Cytochrome b5-like heme/steroid binding domain
WBGene00001503	fum-1	fum-1 is orthologous to human FUMARASE (FH; OMIM:136850), which when mutated leads to fumarase deficiency; FUM-1A and FUM-1B are predicted to be mitochondrial.	9.56				ENSG00000091483	FH	Fumarate lyase family
WBGene00019196	H14A12.3	H14A12.3 encodes an ortholog of S. cerevisiae RAV2; like RAV2, H14A12.3 may be required for the reassociation of vacuolar proton-translocating ATPase (V-ATPase) after temporary glucose starvation.	9.56				ENSG00000067836	ROGDI	RAVE subunit 2/Rogdi
WBGene00019127	cgt-3	cgt-3 encodes a transmembrane protein that is one of three C. elegans ceramide glucosyltransferases; by homology, CGT-3 is predicted to localize to the Golgi membrane and catalyze the transfer of glucose from UDP-glucose to ceramide to synthesize glucosylceramide, a glycosphingolipid precursor; although cgt-3 mutant worms show no obvious defects, animals doubly mutant for cgt-3 and cgt-1 arrest d…	9.55				ENSG00000148154	UGCG	Ceramide glucosyltransferase
WBGene00001089	dre-1	dre-1 encodes an ortholog of human FBXO11/PRMT9 (OMIM:607871, associated with vitiligo and otitis media) that is required, in conjunction with DAF-12 and its partners, for global developmental timing of the transistion from larval to adult cell fates; DRE-1 has an N-terminal F-box domain, three central tandem C-terminal CASH domains, and a C-terminal zinc finger; hypomorphic dre-1 mutations are s…	9.55	Y		Y	ENSG00000147912	FBXO10	F-box domain
WBGene00017852	F27C1.2	none available	9.55	Y			ENSG00000136868	SLC31A1	Ctr copper transporter
WBGene00001092	dro-1	none available	9.54				ENSG00000117505	DR1	Transcription factor CBF/NF-Y/archaeal histone domain
WBGene00001814	haf-4	haf-4 encodes a half-molecular ATP-binding cassette (ABC) transporters similar to the conserved half-type ATP-binding cassette (ABC) transporter, TAPL/ABCB9; in elegans, haf-4 along with another TAPL gene, haf-9 is required for the formation of intestinal organelles; haf-4 and haf-9 are required for proper growth, normal brood size and for the normal defecation cycle; haf-4 and haf-9 are localize…	9.54			Y	ENSG00000250264	n/a	ABC transporter-like
WBGene00022800	ZK688.5	none available	9.54	Y			n/a	n/a	n/a
WBGene00020706	atg-9	none available	9.52				ENSG00000181652	ATG9B	Autophagy-related protein 9
WBGene00007464	C08H9.3	none available	9.52			Y	ENSG00000173818	ENDOV	Glycosyl transferase, ALG6/ALG8
WBGene00000843	cup-2	cup-2 encodes a C. elegans Derlin ortholog; the primary phenotype of cup-2 animals is an accumulation of secreted GFP in the pseudocoelom, suggesting a decrease in, or the absence of, endocytosis in coelomocytes; CUP-2 localizes to endosomes and to the endoplasmic reticulum.	9.52			Y	ENSG00000136986	DERL1	Derlin
WBGene00000254	bli-4	bli-4 encodes a variety of related subtilases (serine endoproteases of the KEX2/subtilisin class), with shared N-termini but varying C-termini, that are collectively required both for larval viability and for stable adhesion of the adult cuticle.	9.51	Y			ENSG00000160613	PCSK7	Peptidase S8/S53 domain
WBGene00003989	pfn-1	pfn-1 encodes a profilin; pfn-1 is required for embryonic cytokinesis, specifically for the assembly or maintenance of cortical microfilaments and myosin; PFN-1 physically interacts with the CYK-1 Formin Homology protein; PFN-1 localizes to the cell cortex.	9.51	Y			ENSG00000176732	PFN4	Profilin
WBGene00017892	F28B4.3	none available	9.49			Y	n/a	n/a	n/a
WBGene00015155	B0353.1	none available	9.48				n/a	n/a	n/a
WBGene00001196	egl-30	egl-30 encodes an ortholog of the heterotrimeric G protein alpha subunit Gq (Gq/G11 class) that affects viability, locomotion, egg laying, synaptic transmission, and pharyngeal pumping; it genetically interacts with the goa-1 pathway, and is probably expressed ubiquitously, with highest expression in excitable cells.	9.48	Y			ENSG00000156049	GNA14	G-protein alpha subunit, group Q
WBGene00013805	bca-2	none available	9.47				n/a	n/a	n/a
WBGene00220253	C05A2.4	none available	9.47				n/a	n/a	n/a
WBGene00002019	hsp-16.48	hsp-16.48 encodes a 16-kD heat shock protein (HSP) that is a member of the hsp16/hsp20/alphaB-crystallin (HSP16) family of heat shock proteins; an hsp-16.48 reporter fusion, expressed broadly but most strongly in body muscle and hypodermis, is induced solely in response to heat shock or other environmental stresses; expression is detectable in somatic tissues in post-gastrulation embryos, all lar…	9.47	Y		Y	ENSG00000276076	n/a	Alpha crystallin/Heat shock protein
WBGene00019401	nuo-4	none available	9.47				ENSG00000281434	NDUFA10	NADH dehydrogenase [ubiquinone] 1 alpha subcomplex subunit 10, mitochondrial
WBGene00004164	pqn-83	The protein product of this gene is predicted to contain a glutamine/asparagine (Q/N)-rich ("prion") domain, by the algorithm of Michelitsch and Weissman (as of the WS77 release of WormBase, i.e., in wormpep77).	9.47				n/a	n/a	n/a
WBGene00001488	frm-1	none available	9.46	Y			ENSG00000277518	MUC6	Ezrin/radixin/moesin-like
WBGene00044578	K01A12.4	none available	9.46			Y	n/a	n/a	n/a
WBGene00016906	C53D5.5	The C53D5.5 gene encodes an ortholog of the human gene GAMMA-GLUTAMYLTRANSFERASE 1 (GGT1), which when mutated leads to glutathionuria (OMIM:231950).	9.45	Y			ENSG00000131067	GGT7	Gamma-glutamyltranspeptidase
WBGene00002077	imb-3	imb-3 encodes an importin-beta-like protein orthologous to Drosophila, vertebrate, and yeast importin/karyopherin-beta3; IMB-3 is predicted to function as a nuclear transport factor that, with the RAN-1 GTPase, regulates nuclear import of ribosomal proteins; in C. elegans, IMB-3 is essential for embryogenesis and germline development, and may also be required for normal postembryonic growth rates.	9.45	Y			ENSG00000137040	RANBP6	HEAT repeat
WBGene00011875	T20G5.14	none available	9.44				n/a	n/a	n/a
WBGene00012351	W09C5.1	none available	9.43	Y		Y	ENSG00000164346	NSA2	Ribosomal protein S8e/ribosomal biogenesis NSA2
WBGene00015547	ain-1	ain-1 encodes an unfamiliar protein synergistically required, with LIN-31, for the normal timing of vulval differentiation, independently of LET-60/RAS, and parallel to or downstream of LIN-14/LIN-28/HBL-1; AIN-1 is expressed in cytoplasmic foci (that are probably P bodies) in several tissues, including vulval precursor cells and neurons; AIN-1 coimmunoprecipitates with DCR-1 and ALG-1, also bind…	9.4	Y		Y	n/a	n/a	n/a
WBGene00010427	hpo-11	none available	9.4	Y			ENSG00000185189	NRBP2	Serine-threonine/tyrosine-protein kinase catalytic domain
WBGene00001334	ero-1	ero-1 encodes an endoplasmic reticulum oxidoreductase that affects ER-stress response and affects reactive oxygen species levels.	9.39	Y			ENSG00000197930	ERO1A	Endoplasmic reticulum oxidoreductin 1
WBGene00011481	imp-2	none available	9.38	Y		Y	ENSG00000101294	HM13	Presenilin/signal peptide peptidase
WBGene00006404	tag-10	tag-10 encodes, by alternative splicing, two nearly identical proteins; TAG-10 proteins are putatively secreted, with an N-terminal signal sequence and four C-terminal WD40 repeats; TAG-10 proteins are orthologous to the GA1 apical gut membrane polyprotein of Haemonchus contortus, and more distantly similar to the periplasmic TolB colicin receptor subunit of E. coli.	9.38				n/a	n/a	n/a
WBGene00000107	alh-1	alh-1 is orthologous to the human gene ALDEHYDE DEHYDROGENASE 2, MITOCHONDRIAL (ALDH2; OMIM:100650), in which a polymorphism can lead to acute ethanol intolerance.	9.36	Y			ENSG00000257767	n/a	Aldehyde dehydrogenase domain
WBGene00002066	ifg-1	ifg-1 encodes, by alternative splicing, two orthologs of the translation initiation factor 4F, ribosome/mRNA-bridging subunit (eIF-4G); by homology, IFG-1 is predicted to function in poly(A) tail-dependent translation initiation; loss of ifg-1 activity in adult animals extends lifespan.	9.36	Y		Y	ENSG00000110321	EIF4G2	MIF4G-like, type 3
WBGene00010834	mct-3	none available	9.36		Y		ENSG00000168679	SLC16A4	Major facilitator superfamily
WBGene00013435	Y66D12A.9	none available	9.36				ENSG00000100911	PSME2	Proteasome activator pa28, N-terminal domain
WBGene00235335	R02D5.24	none available	9.35				n/a	n/a	n/a
WBGene00019663	K11H12.7	none available	9.34	Y		Y	n/a	n/a	n/a
WBGene00009926	noah-2	noah-2 encodes a PAN and ZP domain-containing protein that is related to the Drosophila extracellular matrix component NompA (no-mechanoreceptor-potential A); loss of noah-2 function via RNAi indicates that NOAH-2 activity is essential for molting; in addition, NOAH-2 appears to be required for embryonic and larval development, reproduction, coordinated locomotion, and the overall health of the a…	9.34	Y			n/a	n/a	n/a
WBGene00000834	cua-1	cua-1 encodes a copper-transporting E1-E2 ATPase orthologous to the human gene ATP7A (OMIM:604384), which when mutated leads to Hailey-Hailey disease; loss of cua-1 activity via RNAi results in a number of defects, including slow growth, uncoordinated or no locomotion, adult and larval lethality, and axon guidance abnormalities; when overexpressed in S. cerevisiae ccc2 mutants, a cua-1 cDNA is ab…	9.32				ENSG00000123191	ATP7B	P-type ATPase
WBGene00004320	rbx-1	The rbx-1 gene encodes an ortholog of the mammalian RING box protein RBX1 (or ROC1), which interacts with several cullins and is a subunit of both the von Hippel-Lindau (VHL) tumor suppressor complex and of the SCF ubiquitin-ligase (E3) complex.	9.31	Y			ENSG00000100387	RBX1	Zinc finger, RING/FYVE/PHD-type
WBGene00008032	C39E9.8	none available	9.3	Y		Y	n/a	n/a	n/a
WBGene00014204	ccdc-47	none available	9.3				ENSG00000125695	n/a	Protein of unknown function DUF1682
WBGene00020915	nol-5	none available	9.3	Y			ENSG00000055044	NOP58	Nop domain
WBGene00020102	R148.3	none available	9.3	Y			ENSG00000119321	FKBP15	n/a
WBGene00004502	rpt-2	none available	9.3		Y	Y	ENSG00000100764	PSMC1	AAA+ ATPase domain
WBGene00021093	W08F4.3	none available	9.3				ENSG00000147955	SIGMAR1	ERG2/sigma1 receptor-like
WBGene00021876	Y54G2A.11	none available	9.3	Y			n/a	n/a	n/a
WBGene00009978	F53E4.1	none available	9.29	Y		Y	ENSG00000124702	KLHDC3	Kelch repeat type 2
WBGene00022286	rga-4	rga-4 encodes a GTPase-activating protein (GAP); RNAi experiments predicted to target rga-4 and the related rga-3 gene result in early embryonic defects, specifically defects in cortical contractility, non-muscle myosin NMY-2 distribution, and the relative size of PAR protein domains; in vitro, RGA-4 positively regulates RHO-1 GTPase activity, consistent with genetic studies showing that the rga-…	9.29	Y			ENSG00000198826	ARHGAP11A	Rho GTPase-activating protein domain
WBGene00021933	Y55F3AR.2	none available	9.29			Y	ENSG00000136810	TXN	Thioredoxin
WBGene00000763	coq-3	coq-3 encodes a putative 3,4-dihydroxy-5-hexaprenylbenzoate methyltransferase, orthologous to S. cerevisiae COQ3; by orthology, COQ-3 is predicted to be in a complex with COQ-4 (and perhaps COQ-6), and to be required for two different steps of ubiquinone synthesis; COQ-3 is required for viability, ubiquinone (coenzyme Q9) biosynthesis and for normally short lifespan; coq-3 null mutations are leth…	9.28	Y			ENSG00000132423	COQ3	Ubiquinone biosynthesis O-methyltransferase
WBGene00000639	col-63	none available	9.27				ENSG00000133661	SFTPD	Nematode cuticle collagen, N-terminal
WBGene00003620	nhr-21	none available	9.27	Y			n/a	n/a	n/a
WBGene00007419	C07E3.9	none available	9.24		Y	Y	ENSG00000258417	n/a	Phospholipase A2
WBGene00016019	C23H3.3	none available	9.24				ENSG00000138303	ASCC1	K Homology domain
WBGene00016020	sptl-1	sptl-1 encodes a putative serine palmitoyltransferase required for normal embryonic and larval developement, locomotion, and speed of growth.	9.24				ENSG00000090054	SPTLC1	Aminotransferase, class I/classII
WBGene00003927	pas-6	pas-6 encodes a type 1 alpha subunit of the 26S proteasome"s 20S protease core particle (CP); PAS-6 is required for embryonic, larval, and germline development and by homology, is predicted to comprise the outer rings of the proteasome and to play a role in selective degradation of ubiquitinated proteins during development; in vitro, PAS-6 interacts with BRP-1, a glutamine/asparagine (Q/N)-rich d…	9.2	Y			ENSG00000256206	n/a	Proteasome alpha-subunit, N-terminal domain
WBGene00004928	soc-1	soc-1 encodes a multisubstrate adaptor (MSA) protein containing an amino-terminal pleckstrin homology domain (PHD); SOC-1 functions as a regulator of growth factor receptor-mediated signal transduction pathways; in addition, SOC-1 also displays functional interactions with the nicotinic acetylcholine receptors (nAChRs): soc-1 mutations result in reduced receptor levels at synapses; SOC-1 physical…	9.2				ENSG00000215568	GAB4	Pleckstrin homology domain
WBGene00004358	rhr-1	rhr-1 encodes an ortholog of human Rhesus blood-group associated glycoprotein (RHAG; OMIM:180297, mutated in chronic hemolytic anemia), a member of the ammonium transporter family, and affects general levels of mRNA transcripts, and embryonic viability in a large-scale RNAi screen.	9.19			Y	ENSG00000188672	RHCE	Ammonium transporter
WBGene00017663	F21D12.3	none available	9.18	Y			n/a	n/a	n/a
WBGene00003926	pas-5	pas-5 encodes a proteasome alpha-type five subunit of the core 20S proteasome subcomplex; loss of pas-5 activity via RNAi results in a variety of defects including embryonic and larval lethality, sterility, and abnormal locomotion; loss of pas-5 activity also results in activation of SKN-1, a transcription factor required in adult worms for the acute response to oxidative stress and maternally fo…	9.18			Y	ENSG00000143106	PSMA5	Proteasome alpha-subunit, N-terminal domain
WBGene00013164	Y53F4B.18	none available	9.17	Y			ENSG00000165591	FAAH2	Amidase
WBGene00008194	C49C3.4	none available	9.16				n/a	n/a	n/a
WBGene00000377	cct-1	cct-1 encodes a putative alpha subunit of the eukaryotic cytosolic ("T complex") chaperonin, orthologous to human TCP1 (OMIM:186980), and required for normal pronuclear-centrosome rotation, positioning of the mitotic spindle, meiosis, and distal tip cell migration; CCT-1 is also required to repress SKN-1-dependent transcription of gst-4, and for fertility and viability; CCT-1 is expressed in larv…	9.16		Y		ENSG00000120438	TCP1	Chaperonin Cpn60/TCP-1 family
WBGene00000704	col-130	none available	9.16			Y	ENSG00000133661	SFTPD	Nematode cuticle collagen, N-terminal
WBGene00013350	slr-2	none available	9.16	Y			ENSG00000151612	ZNF827	Zinc finger C2H2-type/integrase DNA-binding domain
WBGene00002021	hsp-17	hsp-17 encodes a heat shock protein that is a member of the hsp16/hsp20/alpha-crystallin family of heat shock proteins; by homology, HSP-17 is predicted to function as a molecular chaperone that protects cells from heat-induced protein aggregation and denaturation.	9.15			Y	ENSG00000276076	n/a	Alpha crystallin/Heat shock protein
WBGene00003519	nac-3	nac-3 encodes a high affinity, sodium-coupled dicarboxylate transporter that is one of four C. elegans proteins related to Drosophila Indy and the mammalian NaDC1 and NaDC3 transporters; when expressed in a heterologous system, NAC-3 exhibits high affinity sodium/succinate cotransporter activity indicating that, functionally, NAC-3 is more closely related to mammalian NaDC3 than NaDC1; nac-3 mRNA…	9.15	Y			ENSG00000164707	SLC13A4	Sodium/sulphate symporter
WBGene00008495	F01D5.5	none available	9.14				n/a	n/a	n/a
WBGene00003798	npp-12	npp-12 encodes Gp210, an evolutionarily conserved membrane protein of the nuclear pore complex (NPC); NPP-12 is required for embryonic viability and normal nuclear membrane structures.	9.14				ENSG00000143552	NUP210L	Bacterial Ig-like, group 2
WBGene00019945	R08C7.1	none available	9.14				n/a	n/a	n/a
WBGene00010259	ric-7	none available	9.14	Y			n/a	n/a	n/a
WBGene00004112	pqn-22	The protein product of this gene is predicted to contain a glutamine/asparagine (Q/N)-rich ("prion") domain, by the algorithm of Michelitsch and Weissman (as of the WS77 release of WormBase, i.e., in wormpep77).	9.13	Y	Y		n/a	n/a	n/a
WBGene00001630	gly-5	gly-5 encodes a UDP-GalNAc:polypeptide N-acetylgalactosaminyltransferase; GLY-5 isoforms exhibit UDP-GalNAc:polypeptide N-acetylgalactosaminyltransferase activity in vitro.	9.12				ENSG00000257594	GALNT4	Ricin B, lectin domain
WBGene00015813	thoc-2	thoc-2 encodes the C. elegans ortholog of mammalian THOC2 and S. cerevisiae Tho2, conserved subunits of the THO complex involved in mRNP biogenesis as part of transcription elongation, mRNA maturation, and export; in C. elegans, thoc-2 activity is required for progression through the meiotic and mitotic cell cycles and thus for normal fertility and organismal development.	9.12				ENSG00000125676	THOC2	THO complex, subunitTHOC2, C-terminal
WBGene00008224	C50B8.1	none available	9.11	Y			ENSG00000119705	SLIRP	RNA recognition motif domain
WBGene00008731	F13B12.3	none available	9.11				n/a	n/a	n/a
WBGene00003144	max-2	max-2 encodes, by alternative splicing, at least two isoforms of a putative p21-activated kinase that is required (redundantly with its paralog, PAK-1) for normal axonal guidance of motoneurons, P cell migration, and locomotion, with max-2(cy2);pak-1(ok448) double mutants phenotypically resembling unc-73 or ced-10;mig-2 mutants; max-2 is expressed ubiquitously in early embryos, then localizes to …	9.11	Y			ENSG00000180370	PAK2	CRIB domain
WBGene00005017	sqt-2	sqt-2 encodes a collagen required for normal alae formation and body morphology; sqt-2 mutants exhibit a slightly dumpy phenotype and the bodies of mutants are helically twisted.	9.11				ENSG00000019169	MARCO	Nematode cuticle collagen, N-terminal
WBGene00016407	C34D10.2	none available	9.1	Y			ENSG00000132478	UNK	Zinc finger, CCCH-type
WBGene00010041	F54C9.3	none available	9.1	Y			n/a	n/a	n/a
WBGene00002275	lem-2	lem-2 encodes the ortholog of the vertebrate LEM2 and MAN1 proteins and contains a LEM domain which is a defining 40 amino acid motif shared by a family of nuclear envelope proteins; LEM family proteins bind to lamins and to the small inner nuclear membrane associated protein BAF; LEM-2 provides an anchor by which chromosomes are attached to the nuclear membrane; lem-2 together with the LEM domai…	9.1				ENSG00000174106	LEMD3	LEM domain
WBGene00010006	F53H2.3	none available	9.09	Y			n/a	n/a	n/a
WBGene00007679	C18D11.1	none available	9.07			Y	n/a	n/a	n/a
WBGene00002070	ile-1	ile-1 is orthologous to the human gene human ERGIC-53, which when mutated leads to deficiency of coagulation factors V/VIII (OMIM:227300).	9.07	Y			ENSG00000140506	LMAN1L	Legume-like lectin
WBGene00010619	K07A1.15	none available	9.07	Y			ENSG00000181817	LSM10	LSM domain, eukaryotic/archaea-type
WBGene00011488	nra-2	none available	9.07	Y		Y	ENSG00000125912	NCLN	Peptidase M28
WBGene00010633	nspd-2	none available	9.07	Y			n/a	n/a	n/a
WBGene00007030	epc-1	none available	9.06	Y			ENSG00000135999	EPC2	Enhancer of polycomb protein
WBGene00002004	hsf-1	hsf-1 encodes the C. elegans heat-shock transcription factor ortholog; HSF-1 functions as a transcriptional regulator of stress-induced gene expression whose activity is required for heat-shock and proteotoxicity response, larval development, innate immunity, and regulation of adult lifespan; HSF-1 binds bovine calmodulin in vitro in a calcium-dependent manner.	9.06	Y			ENSG00000025156	HSF2	Heat shock factor (HSF)-type, DNA-binding
WBGene00008852	ubql-1	none available	9.06				ENSG00000175518	UBQLNL	Ubiquitin domain
WBGene00021441	Y39A3CL.3	none available	9.06				n/a	n/a	n/a
WBGene00000857	cwn-1	cwn-1 encodes one of five C. elegans Wnt signaling ligands; during embryogenesis cwn-1 likely functions as a downstream target of the PAL-1 homeodomain protein in the regulatory network that specifies cell fates in the C lineage that gives rise to ectodermal and muscle tissue; consistent with this role, loss of cwn-1 activity via RNAi results in rare larval tail defects that may result, in part, …	9.05		Y		ENSG00000277641	WNT3	Wnt
WBGene00009126	pyk-1	pyk-1 encodes one of two C. elegans pyruvate kinases; large-scale RNAi experiments indicate that pyk-1 is essential for embryonic development and specifically, for normal cortical activity in the AB blastomere; large-scale expression studies show that pyk-1 is expressed in body wall muscle in larvae and in body wall and vulval muscle, as well as in the reproductive system, in adults.	9.05	Y			ENSG00000262785	PKLR	Pyruvate kinase
WBGene00015344	nra-4	none available	9.04	Y			ENSG00000278087	NOMO3	Immunoglobulin-like fold
WBGene00007959	C35C5.10	none available	9.03			Y	ENSG00000157600	TMEM164	Transmembrane protein 164
WBGene00006803	unc-70	unc-70 encodes two isoforms of a beta-spectrin ortholog required for normal body curvature and shape, normal movement, and correct localization of the alpha-spectrin SPC-1; the predominant UNC-70 isoform is expressed in all embryonic cells except the intestine, at the plasma membrane at sites of intercellular contact; UNC-70 becomes largely restricted to muscles and neurons from hatching to adult…	9.03	Y	Y		ENSG00000163554	SPTA1	Pleckstrin homology domain, spectrin-type
WBGene00013690	hprt-1	hprt-1 encodes an ortholog of human HYPOXANTHINE PHOSPHORIBOSYLTRANSFERASE 1 (HPRT1), which when mutated leads to Lesch-Nyhan syndrome (OMIM:308000).	9.02	Y			ENSG00000099256	PRTFDC1	Phosphoribosyltransferase domain
WBGene00022505	ZC21.3	ZC21.3 encodes a protein predicted to contain a glutamine/asparagine (Q/N)-rich ("prion") domain, by the algorithm of Michelitsch and Weissman (as of the WS77 release of WormBase, i.e., in wormpep77).	9.01	Y			n/a	n/a	n/a
WBGene00000900	daf-4	daf-4 encodes a transmembrane serine/threonine kinase that is the sole C. elegans ortholog of the type II transforming growth factor-beta (TGF-b) receptors; DAF-4 activity is required for several biological processes, including entry into and exit from the dauer larval stage, body size determination, male tail patterning, egg laying, chemosensory neuron specification, and increased thermotoleranc…	8.99				ENSG00000163513	TGFBR2	Ser/Thr protein kinase, TGFB receptor
WBGene00021281	ell-1	none available	8.99	Y		Y	ENSG00000105656	ELL	Occludin homology domain
WBGene00004077	pop-1	pop-1 encodes an HMG box-containing protein that is the sole C. elegans member of the TCF/LEF family of transcription factors; in C. elegans, POP-1 functions as a component of the canonical and noncanonical Wnt signaling pathways that are required for cell migrations and binary cell fate decisions associated with asymmetric cell division, respectively; in yeast two-hybrid assays, the POP-1 N-term…	8.98				ENSG00000138795	LEF1	High mobility group box domain
WBGene00022704	ZK353.9	none available	8.98				ENSG00000057757	PITHD1	Galactose-binding domain-like
WBGene00013168	arp-1	none available	8.97	Y			ENSG00000115073	ACTR1B	Actin family
WBGene00019301	K02D10.1	none available	8.97	Y			ENSG00000184117	NIPSNAP1	2-phosphoglycolate phosphatase, eukaryotic
WBGene00003030	lin-45	The lin-45 gene encodes an ortholog of the vertebrate protein RAF which is required for larval viability, fertility and the induction of vulval cell fates.	8.97	Y			ENSG00000132155	RAF1	Protein kinase domain
WBGene00012423	Y10G11A.1	none available	8.97	Y		Y	n/a	n/a	n/a
WBGene00004025	phy-2	phy-2 encodes a catalytic alpha subunit of collagen prolyl 4-hydroxylase (P4H) orthologous to human P4H alpha (II) isoform (OMIM: 600608); phy-2 is responsible for hydroxylation of cuticle collagen; loss-of-function mutations result in phenotypically wild-type animals, however phy-1; phy-2 double mutants arrest as embryos and larvae, suggesting that the PHY-1 and PHY-2 P2H alpha subunits function…	8.96		Y	Y	ENSG00000072682	P4HA2	Oxoglutarate/iron-dependent dioxygenase
WBGene00001562	lin-66	lin-66 encodes an unfamiliar protein, with visible homologs only in nematodes, that was identified in screens for molecules that interact with GEX-3, a homolog of mammalian protein ligands of the small GTPase Rac1, that is essential for ventral enclosure during embryonic development; LIN-66 is expressed in body wall and vulval muscles, and is also detected in the intestine, neurons, and probably …	8.95	Y		Y	n/a	n/a	n/a
WBGene00022493	mrpl-45	none available	8.95				ENSG00000278845	MRPL45	Tim44-like domain
WBGene00006567	tgt-2	none available	8.93	Y			ENSG00000151576	QTRT2	tRNA-guanine(15) transglycosylase-like
WBGene00012693	Y39B6A.34	none available	8.93	Y			ENSG00000256053	APOPT1	Uncharacterised protein family UPF0671
WBGene00022093	Y69A2AR.22	none available	8.93				n/a	n/a	n/a
WBGene00022680	ZK180.6	none available	8.93				n/a	n/a	n/a
WBGene00000789	cpz-2	none available	8.91				ENSG00000101160	CTSZ	Peptidase C1A, papain C-terminal
WBGene00022456	pfkb-1.1	pfkb-1.1 encodes a 6-phosphofructo-2-kinase/fructose-2,6-bisphosphatase (EC: 3.1.3.46) paralogous to PFKB-1.2; by homology, PFKB-1.1 is predicted to be a bifunctional enzyme that catalyzes the phosphorylation of fructose 6-phosphate and dephosphorylation of fructose 2,6-bisphosphate.	8.91	Y			ENSG00000158571	PFKFB1	Fructose-2,6-bisphosphatase
WBGene00012932	Y47D3A.21	none available	8.91				ENSG00000139726	DENR	Translation initiation factor SUI1
WBGene00022114	Y71F9AL.9	none available	8.91	Y			ENSG00000196141	SPATS2L	UBA-like
WBGene00043120	C09H10.4	none available	8.9				n/a	n/a	n/a
WBGene00009435	F35G2.1	none available	8.9	Y			ENSG00000165661	QSOX2	Thioredoxin-like fold
WBGene00003831	nuo-1	nuo-1 encodes a encodes a 51 kDa subunit of mitochondrial complex I that is required for oxidative phosphorylation, resistance to volatile anesthetics, and progression through development; nuo-1 is orthologous to human NDUFV1 (OMIM:161015, mutated in Leigh syndrome); nuo-1(ua1) induces a developmental arrest at the third larval (L3) stage that blocks reproduction, and thus is lethal to a populati…	8.9				ENSG00000167792	NDUFV1	NADH ubiquinone oxidoreductase, F subunit
WBGene00004014	phb-1	phb-1 encodes the C. elegans ortholog of prohibitin PHB1; loss of phb-1 activity via RNAi indicates that phb-1 function is required for mitochondrial organization and morphology and for embryonic, germline, and somatic gonad development; PHB-1, along with prohibitin subunit PHB-2, forms a macromolecular complex that localizes to mitochondrial membranes; PHB-1 and PHB-2 are dependent upon one anot…	8.9				ENSG00000167085	PHB	Prohibitin
WBGene00004135	pqn-48	The protein product of this gene is predicted to contain a glutamine/asparagine (Q/N)-rich ("prion") domain, by the algorithm of Michelitsch and Weissman (as of the WS77 release of WormBase, i.e., in wormpep77).	8.89		Y		ENSG00000216490	IFI30	Gamma interferon inducible lysosomal thiol reductase GILT
WBGene00000079	adr-1	adr-1 encodes, through alternative splicing, at least five isoforms of an adenosine deaminase that acts on RNA (ADAR); ADARs are RNA-editing enzymes that deaminate adenosines to create inosines in double-stranded RNA (dsRNA); adr-1 is expressed in embryos, most or all neurons (e.g., sensory neurons and cilia, the ventral nerve cord, motor neurons and interneurons) and in the developing (but not t…	8.88				ENSG00000164113	ADAD1	Adenosine deaminase/editase
WBGene00015752	C14B9.2	C14B9.2 encodes a protein disulfide isomerase; by homology, the product of C14B9.2 is predicted to function in oxidative protein folding in the endoplasmic reticulum (ER); C14B9.2 transcript levels are increased in response to ER stress.	8.88	Y			ENSG00000167004	PDIA3	Disulphide isomerase
WBGene00012005	2022-06-01	jun-1 encodes a basic-leucine zipper (bZIP) transcription factor that is the C. elegans JUN homolog; jun-1 activity is essential for regulation of ovulation, and thus normal levels of fertility; in regulating ovulation, JUN-1 functions with FOS-1 to regulate expression of plc-1 which encodes a phospholipase C essential for IP3 production and ovulation; in addition, JUN-1 interacts with FOS-1 in v…	8.87	Y			n/a	n/a	n/a
WBGene00001747	gsp-1	none available	8.87	Y			ENSG00000186298	PPP1CC	Calcineurin-like phosphoesterase domain, apaH type
WBGene00000224	atgp-1	atgp-1 encodes a predicted amino acid transporter glycoprotein subunit; when co-expressed in Xenopus oocytes with the AAT-1 or AAT-3 catalytic subunit, ATGP-1 is not able to facilitate amino acid uptake, even though ATGP-1 is able to covalently associate with AAT-1 or AAT-3 in the Xenopus expression system; however, when co-expressed with AAT-9, ATGP-1 is able to enhance the activity of this cata…	8.86	Y		Y	ENSG00000168003	SLC3A2	Glycosyl hydrolase, family 13, catalytic domain
WBGene00021733	otub-2	The Y50C1A.1 gene encodes an A20-like protease homolog that may be involved in apoptosis.	8.86				ENSG00000118503	TNFAIP3	OTU domain
WBGene00022865	ufbp-1	none available	8.86			Y	ENSG00000198171	DDRGK1	Winged helix-turn-helix DNA-binding domain
WBGene00001320	ent-1	ent-1 encodes a predicted equilibrative nucleoside transporter 1 that affects growth.	8.85	Y			ENSG00000174669	SLC29A2	Equilibrative nucleoside transporter
WBGene00001461	flp-18	flp-18 encodes the only FMRFamide-related neuropeptide (FaRP) encoded by the C. elegans genome, other than flp-21, that activates the solitary (215V) form of NPR-1 in Xenopus oocytes; in addition, FLP-18 can activated the social (215F) form of NPR-1 in pharyngeal assays; FLP-18 is expressed in the interneurons AVA, AIY and RIG, the motor neuron RIM and the pharyngeal neurons M2 and M3.	8.85				n/a	n/a	n/a
WBGene00022252	Y73B6BL.31	none available	8.85				ENSG00000151812	SLC35F4	Sugar phosphate transporter domain
WBGene00013531	Y73F8A.26	none available	8.85		Y		ENSG00000110811	P3H3	Tetratricopeptide-like helical domain
WBGene00013532	Y73F8A.27	none available	8.85				ENSG00000137714	FDX1	2Fe-2S ferredoxin-type iron-sulfur binding domain
WBGene00001397	fat-5	fat-5 encodes a delta-9 fatty acid desaturase that is predicted to be mitochondrial; when expressed heterologously in S. cerevisiae, FAT-5 rescues the fatty acid auxotrophy of the yeast delta-9 desaturase mutant ole1.	8.84			Y	ENSG00000145284	SCD5	Fatty acid desaturase, type 1, core
WBGene00002250	lap-2	The lap-2 gene encodes a homolog of the zinc metalloprotease leucine aminopeptidase LAP.	8.84	Y			ENSG00000002549	LAP3	Peptidase M17, leucyl aminopeptidase, C-terminal
WBGene00000245	bca-1	bca-1 encodes a member of the carbonic anhydrase family.	8.83		Y		n/a	n/a	n/a
WBGene00009294	F31D4.9	none available	8.83				n/a	n/a	n/a
WBGene00010738	K10D3.4	none available	8.82	Y			ENSG00000003436	TFPI	Pancreatic trypsin inhibitor Kunitz domain
WBGene00014213	ZK1073.1	none available	8.81	Y			ENSG00000165795	NDRG2	NDRG
WBGene00017834	F26F12.3	none available	8.8	Y		Y	n/a	n/a	n/a
WBGene00002271	lec-8	lec-8 encodes a glycolipid-binding galectin; LEC-8 binds glycolipids and can inhibit Bacillus thuringiensis Cry5B from binding glycolipids; lec-8 mutants are more susceptible to Cry5B; lec-8 is expressed in the pharyngeal-intestinal valve, the intestinal-rectal valve, and in some vesicles of the intestine; lec-8 expression in the intestine is induced in response to bacterial infection and Cry5B, …	8.8				ENSG00000131981	LGALS3	Galectin, carbohydrate recognition domain
WBGene00021286	Y24D9A.8	Y24D9A.8 is orthologous to the human gene Transaldolase 1 (TALDO1), a key enzyme in the pentose phosphate pathway, which provides ribose-5-phosphate for nucleic acid synthesis and NADPH for lipid biosynthesis.	8.8	Y		Y	ENSG00000177156	TALDO1	Transaldolase/Fructose-6-phosphate aldolase
WBGene00007605	asp-10	none available	8.78				ENSG00000256713	PGA5	Aspartic peptidase A1 family
WBGene00194866	Y41C4A.22	none available	8.78				n/a	n/a	n/a
WBGene00004047	plx-1	plx-1 encodes a C. elegans plexin ortholog; by homology, PLX-1 is predicted to function as a semaphorin receptor whose activity is required for proper positioning of the ray 1 cells in the male tail; genetic analyses indicate that while plx-1 functions in the same genetic pathway as the smp-1 and smp-2 semaphorin-encoding genes to position ray 1 cells, it functions in parallel to unc-73/GEF and t…	8.77				ENSG00000198753	PLXNB3	Sema domain
WBGene00015742	C13F10.2	none available	8.76				ENSG00000105700	KXD1	Uncharacterised domain KxDL
WBGene00000694	col-120	none available	8.76	Y			ENSG00000182447	OTOL1	Nematode cuticle collagen, N-terminal
WBGene00009574	F40E10.6	none available	8.76	Y			ENSG00000164168	TMEM184C	Organic solute transporter subunit alpha/Transmembrane protein 184
WBGene00012435	flh-1	none available	8.76	Y			n/a	n/a	n/a
WBGene00001480	fmo-5	fmo-5 encodes a flavin-containing monoxygenase homologous to human FMO1, FMO2, and FMO3 (OMIM:602079, mutated in trimethylaminuria).	8.76				ENSG00000215834	n/a	Flavin monooxygenase FMO
WBGene00044794	Y59A8B.25	none available	8.76				ENSG00000134265	NAPG	NSF attachment protein
WBGene00008607	F09B12.3	none available	8.75				ENSG00000151176	PLBD2	Phospholipase B-like
WBGene00018240	cox-17	none available	8.74				ENSG00000138495	COX17	Cytochrome c oxidase copper chaperone
WBGene00010828	M02B1.3	none available	8.74	Y			ENSG00000185561	TLCD2	TRAM/LAG1/CLN8 homology domain
WBGene00004397	rol-6	The rol-6 gene encodes a cuticle collagen related to human collagen alpha 1 (III) chain precursor (OMIM:120180), and is required for normal cuticular morphology; ROL-6 interacts with SQT-1, a closely related cuticle collagen, and is expressed at all stages from L2 to adult with transcripts detected at each of the molts preceding these stages.	8.74	Y			ENSG00000206561	COLQ	Nematode cuticle collagen, N-terminal
WBGene00006715	ubc-20	none available	8.74	Y	Y		ENSG00000078140	UBE2K	Ubiquitin-conjugating enzyme E2
WBGene00006769	unc-33	unc-33 encodes a conserved member of the CRMP/TOAD/Ulip/DRP family of proteins that includes mammalian CRMP-2 (Collapsin response mediator protein-2), which is essential for axon guidance and axonogenesis; in C. elegans, unc-33 activity is required for several biological processes including outgrowth and guidance of sensory, motor, and interneurons, sex myoblast migration, normal body movement an…	8.74	Y		Y	n/a	n/a	n/a
WBGene00008053	cdc-48.2	cdc-48.2 encodes a AAA (ATPase associated with various cellular activities) ATPase that is one of two C. elegans p97/VCP/CDC48 homologs; cdc-48.2 acts redundantly with cdc-48.1 in endoplasmic reticulum-associated protein degradation (ERAD); in addition, cdc-48.1 and cdc-48.2 together provide an essential function during embryonic development; CDC-48.2 exhibits ATPase activity when expressed in vi…	8.72	Y	Y	Y	ENSG00000171763	SPATA5L1	CDC48, N-terminal subdomain
WBGene00235094	K08D9.9	none available	8.72				n/a	n/a	n/a
WBGene00003749	nlp-11	none available	8.69	Y			n/a	n/a	n/a
WBGene00006050	ssq-1	ssq-1 encodes a member of the sperm-specific, class Q family of proteins; about 5% of ssq-1 transcripts are RNA edited to change A to G resulting in a change to residue 127 from an G to a G.	8.69			Y	ENSG00000049540	ELN	n/a
WBGene00002190	kin-2	kin-2 encodes a predicted regulatory subunit of a cAMP-dependent protein kinase that may act downstream of, or in parallel to, ric-8.	8.68	Y			ENSG00000114302	PRKAR2A	Cyclic nucleotide-binding domain
WBGene00006412	nlg-1	nlg-1 encodes the sole C. elegans neuroligin homolog; nlg-1 activity is required for a subset of sensory behaviors and sensory processing, and for normal sensitivity to oxidative stress and mercury compounds; NLG-1 is expressed in a variety of neurons, including sensory, motor, and interneurons, and localizes to synaptic regions.	8.68		Y		ENSG00000169992	NLGN2	Carboxylesterase, type B
WBGene00007516	gpx-5	gpx-5 encodes a glutathione peroxidase; by homology, GPX-5 is predicted to function to reduce lipid hydroperoxides to their corresponding alcohols and reduce hydrogen peroxide to water to protect cells from damage induced by reactive oxygen species.	8.67				ENSG00000176153	GPX2	Glutathione peroxidase
WBGene00001633	gly-8	gly-8 encodes a predicted transmembrane polypeptide N-acetylgalactosaminyl transferase (ppGaNTase) similar to the essential Drosophila ppGaNTase encoded by Pgant35A; by homology, GLY-8 is predicted to function as a Golgi enzyme that catalyzes transfer of N-acetylgalactosamine to serine and threonine-containing acceptor peptides, thus initiating mucin-type O-glycosylation; as loss of gly-8 activit…	8.66				ENSG00000185274	WBSCR17	Glycosyltransferase 2-like
WBGene00020868	eif-1	none available	8.64				ENSG00000069943	PIGB	Translation initiation factor SUI1
WBGene00007027	ssl-1	The protein product of this gene is predicted to contain a glutamine/asparagine (Q/N)-rich ("prion") domain, by the algorithm of Michelitsch and Weissman (as of the WS77 release of WormBase, i.e., in wormpep77)	8.64	Y			ENSG00000282034	n/a	SNF2-related, N-terminal domain
WBGene00006704	ubc-7	ubc-7 encodes an E2 ubiquitin-conjugating enzyme; by homology, UBC-7 is predicted to function in the covalent attachment of ubiquitin molecules to protein substrates via its association with an E3 ubiquitin-protein ligase; loss of ubc-7 activity via large-scale RNAi screens results in no obvious abnormalities.	8.64				ENSG00000184787	UBE2G2	Ubiquitin-conjugating enzyme E2
WBGene00006893	spon-1	spon-1 encodes a conserved member of the spondin family of ECM proteins, closely related to vertebrates spondins (OMIM: 604989, 605918); spon-1 most resemble to F-spondins which contain a N-terminal reelin domain and upto six thrombospondin type I repeats (TSRs); spon-1 mutants display defects in epidermal elongation, muscle attachment, axon guidance and development of excretory canal and of epid…	8.63		Y	Y	ENSG00000144229	THSD7B	Thrombospondin type-1 (TSP1) repeat
WBGene00000192	arl-8	arl-8 encodes an Arf-like small GTPase and is highly conserved among multicellular organisms; arl-8 regulates transport of axonal presynaptic vesicle protein cargo, most likely by preventing vesicle aggregation; arl-8 is involved in endosome to lysosome transport, by promoting late endosome-lysosome fusion; arl-8 is also required for proper embryonic development; arl-8 associates with synaptic ve…	8.62	Y		Y	ENSG00000134108	ARL8B	Small GTP-binding protein domain
WBGene00007405	C07A9.9	none available	8.62	Y		Y	n/a	n/a	n/a
WBGene00002023	hsp-25	hsp-25 encodes a member of the small heat shock family of proteins; HSP-25 is expressed throughout development and in vitro, exhibits chaperone activity; HSP-25 localizes to: 1) dense bodies and M lines in body wall muscle, 2) the lining of the pharynx, and 3) to cell-cell junctions in the spermathecal wall; consistent with a role in myofibril organization, HSP-25 binds vinculin and alpha-actinin…	8.62	Y	Y		ENSG00000170276	HSPB2	Alpha crystallin/Heat shock protein
WBGene00009580	xbx-6	none available	8.62	Y		Y	ENSG00000178719	GRINA	Bax inhibitor 1-related
WBGene00014118	ZK858.5	none available	8.62	Y			n/a	n/a	n/a
WBGene00014119	ZK858.6	none available	8.62	Y		Y	ENSG00000125304	TM9SF2	Nonaspanin (TM9SF)
WBGene00015021	B0205.6	none available	8.61				ENSG00000272897	n/a	Aminotransferase class V domain
WBGene00002123	inx-1	inx-1 encodes a predicted member of the innexin family; expressed in 4-6 anterior neurons.	8.61		Y		n/a	n/a	n/a
WBGene00003753	nlp-15	none available	8.61	Y			n/a	n/a	n/a
WBGene00006572	tin-9.1	tin-9.1 encodes one of two C. elegans members of the Tin9 family of mitochondrial import proteins; TIN-9.1 activity is required for protein import into the mitochondrial inner membrane; TIN-9.1 is also required for normal fertility, embryonic development, body size, and time of reproductive onset.	8.6		Y	Y	ENSG00000100575	TIMM9	Tim10/DDP family zinc finger
WBGene00004892	sms-1	none available	8.59	Y		Y	ENSG00000164023	SGMS2	Sphingomyelin synthase-like domain
WBGene00012386	agef-1	agef-1 encodes a putative ARF guanine nucleotide exchange factor orthologous to human ARFGEF1 (OMIM:604141) and ARFGEF2 (OMIM:605371); agef-1(RNAi) inhibits CAV-1 body formation in oocytes more severely than arf-1 disruption alone, indicating that activation of both ARF-1 and ARF-3 by AGEF-1 may be required for transport of caveolin from Golgi to CAV-1 bodies during oogenesis; more generally, AGE…	8.57				ENSG00000124198	ARFGEF2	Sec7 domain
WBGene00018270	F41C3.4	none available	8.57	Y			ENSG00000174567	GOLT1A	Vesicle transport protein, Got1/SFT2-like
WBGene00019716	M01G5.3	none available	8.56				ENSG00000189077	TMEM120A	TMPIT-like
WBGene00004175	pqn-96	The protein product of this gene is predicted to contain a glutamine/asparagine (Q/N)-rich ("prion") domain, by the algorithm of Michelitsch and Weissman (as of the WS77 release of WormBase, i.e., in wormpep77).	8.56	Y			n/a	n/a	n/a
WBGene00021956	Y57E12AL.1	none available	8.56				ENSG00000184716	SERINC4	Serine incorporator/TMS membrane protein
WBGene00001058	dpf-5	dpf-5 encodes a putative acylamino-acid-releasing enzyme (AARE; EC 3.4.19.1), orthologous to human APEH, with no obvious function in mass RNAi assays.	8.55				ENSG00000164062	APEH	Peptidase S9, prolyl oligopeptidase, catalytic domain
WBGene00001449	flp-6	none available	8.55				n/a	n/a	n/a
WBGene00012182	osta-3	none available	8.55	Y		Y	ENSG00000163959	SLC51A	Organic solute transporter subunit alpha/Transmembrane protein 184
WBGene00010677	gtbp-1	none available	8.54				ENSG00000145907	G3BP1	RNA recognition motif domain
WBGene00006751	unc-11	unc-11 encodes multiple isoforms of a clathrin-adaptor protein AP180 (OMIM:603025) that functions in clathrin-mediated endocytosis; UNC-11 is essential for embryogenesis, locomotion, and pharyngeal pumping, and regulates neurotransmitter release by controlling vesicle trafficking and fusion; UNC-11 is also required for localization of SNB-1/synaptobrevin to synaptic vesicles, thus acting as a sor…	8.54	Y		Y	ENSG00000073921	PICALM	ENTH/VHS
WBGene00016393	C34B2.8	none available	8.53			Y	ENSG00000258674	n/a	GRIM-19
WBGene00008042	C40H1.7	none available	8.53		Y		n/a	n/a	n/a
WBGene00018426	F44E7.4	none available	8.53				ENSG00000078618	NRDC	Peptidase M16, C-terminal
WBGene00017298	toca-1	none available	8.53	Y		Y	ENSG00000137942	FNBP1L	FCH domain
WBGene00017548	F18A1.7	none available	8.51	Y			n/a	n/a	n/a
WBGene00004110	pqn-20	The protein product of this gene is predicted to contain a glutamine/asparagine (Q/N)-rich ("prion") domain, by the algorithm of Michelitsch and Weissman (as of the WS77 release of WormBase, i.e., in wormpep77).	8.51	Y		Y	n/a	n/a	n/a
WBGene00020784	tat-4	tat-4 encodes one of six C. elegans subfamily IV P-type ATPase that, by sequence similarity, is proposed to function as an aminophospholipid translocase (flippase); loss of tat-4 function via RNAi or deletion mutation results in no obvious developmental or morphological defects, however tat-4 deletion mutants are hypersensitive to sterol deprivation and this hypersensitivity is enhanced by a muta…	8.51				ENSG00000206190	ATP10A	P-type ATPase
WBGene00006833	unc-108	unc-108 encodes a small GTPase homologous to the Rab GTPases that function in endocytosis, membrane fusion, and vesicular trafficking events; unc-108 function is required in neurons for normal locomotion; unc-108 also functions in the removal of apoptotic cells, specifically it functions in engulfing cells for the recruitment and fusion of the lysosome to the phagosome; unc-108 is expressed in ne…	8.51	Y			ENSG00000129472	RAB2B	Small GTPase superfamily
WBGene00009532	ccch-1	ccch-1 encodes a CCCH tandem zinc finger (TZF) protein; based upon its sequence similarity to human tristetraprolin and ERF-2 the product of F38B7.1 is predicted to function as an RNA-binding protein that specifically binds to UAUU repeats.	8.5	Y			ENSG00000152518	ZFP36L2	Zinc finger, CCCH-type
WBGene00010701	ent-2	none available	8.5	Y			ENSG00000174669	SLC29A2	Equilibrative nucleoside transporter
WBGene00019157	H05C05.1	none available	8.48	Y			n/a	n/a	n/a
WBGene00022500	lfi-1	lfi-1 encodes, by alternative splicing, at least four isoforms of a large coiled-coil protein paralogous to F35D11.11, and possibly orthologous to rootletin (the structural protein comprising ciliary rootlets); LFI-1 is also homologous to the Parascaris univalens Mitotic Antigen, PUMA1; LFI-1 was initially identified in yeast two-hybrid screens for proteins that interact with the coiled-coil prot…	8.48			Y	ENSG00000226321	CROCC2	n/a
WBGene00000620	col-43	col-43 encodes a collagen that is individually dispensable for viability and gross morphology in mass RNAi screens.	8.47	Y			ENSG00000019169	MARCO	Nematode cuticle collagen, N-terminal
WBGene00004930	sod-1	sod-1 encodes the copper/zinc superoxide dismustase, an enzyme that is known to protect cells from oxidative damage; superoxide dismutase activity can be detected in worm extracts; sod-1 activity has been implicated in the increased life-span of dauer larvae where this enzyme demonstrates the highest activity compared to other life-stages as well as in the increased life span of age-1 mutants and…	8.47	Y			ENSG00000173992	CCS	Superoxide dismutase, copper/zinc binding domain
WBGene00011644	T09B9.3	none available	8.47				ENSG00000006007	GDE1	Glycerophosphoryl diester phosphodiesterase
WBGene00006490	kdin-1	F36H1.2 encodes a KAP family P-loop predicted NTPase, with two or four transmembrane helices inserted into the P-loop NTPase domain; KAP NTPases include the neuronal membrane protein and receptor tyrosine kinase substrate Kidins220/ARMS (conserved in metazoa) and the F-plasmid PifA protein involved in phage T7 exclusion (with other bacterial homologs being sporadically distributed); F36H1.2 is ex…	8.46				ENSG00000134313	KIDINS220	Ankyrin repeat
WBGene00019347	mbl-1	mbl-1 encodes, by alternative splicing, two isoforms of a putative MUSCLEBLIND-type mRNA splicing regulator required in adults for normal muscle dense body organization, locomotion, and vulval morphogenesis; MBL-1 is orthologous to Drosophila MBL and human MBNL1 (OMIM:606516), MBNL2 (OMIM:607327), and MBNL3 (OMIM:300413); mbl-1 is transcribed in larvae and adults; mbl-1(RNAi) animals show protrud…	8.46	Y			ENSG00000139793	MBNL2	Zinc finger, CCCH-type
WBGene00017864	pcca-1	The F27D9.5 gene encodes an ortholog of the human gene PROPIONYL-COA CARBOXYLASE ALPHA SUBUNIT (PCCA), which when mutated leads to propionicaciduria, type I (OMIM:232000).	8.46				ENSG00000078070	MCCC1	Biotin/lipoyl attachment
WBGene00001045	dnj-27	This gene encodes a protein containing a DnaJ ("J") domain.	8.45			Y	ENSG00000077232	DNAJC10	DnaJ domain
WBGene00235102	Y54G2A.75	none available	8.45	Y		Y	ENSG00000140830	TXNL4B	Dim1 family
WBGene00001459	flp-16	flp-16 encodes a predicted FMRFamide-like peptide neurotransmitter that inhibits action potentials in the pharyngeal muscle when applied to the pharynx of dissected worms.	8.44				n/a	n/a	n/a
WBGene00000991	dhs-28	dhs-28 encodes an ortholog of human 17-BETA-HYDROXYSTEROID DEHYDROGENASE 4 (HSD17B4; OMIM:601860, mutated in D-bifunctional protein deficiency), which contains a C-terminal SCP-2 sterol transfer domain; the deletion allele dhs-28(ok450) is superficially wild-type.	8.43	Y			ENSG00000132631	SCP2D1	Short-chain dehydrogenase/reductase SDR
WBGene00004210	ptc-3	ptc-3 encodes an ortholog of Drosophila PATCHED (PTC) and human PTCH (OMIM:601309, mutated in basal cell nevus syndrome), which defines one of seven paralogous families of sterol sensing domain (SSD) proteins; PTC-3 is strongly required for normal molting from L1 to L3 larval stages; PTC-3 is also required for normal growth to full size and for viability.	8.42			Y	ENSG00000117425	PTCH2	Protein patched/dispatched
WBGene00003057	lon-3	lon-3 encodes a cuticle collagen; during development, lon-3 acts downstream of the TGF-beta signaling pathway to specify body length; lon-3 reporter fusions are expressed in hypodermal cells and LON-3 appears to localize to the surface of the animal, consistent with a role in cuticle formation.	8.4			Y	ENSG00000206561	COLQ	Nematode cuticle collagen, N-terminal
WBGene00020038	R12E2.13	none available	8.4				ENSG00000128228	SDF2L1	MIR motif
WBGene00020274	T05H4.11	none available	8.4	Y		Y	n/a	n/a	n/a
WBGene00016749	C48E7.1	none available	8.39	Y		Y	n/a	n/a	n/a
WBGene00003828	nuc-1	The nuc-1 gene encodes a DNase II homolog similar to mammalian and Drosophila DNaseII enzymes and is required for DNA degradation during apoptosis as well as for degradation of dietary DNA during normal feeding; during apoptosis, NUC-1 functions in apoptotic cells at an intermediate stage of DNA degradation, after the killing step, but prior to cell-corpse engulfment.	8.39			Y	ENSG00000105612	DNASE2	Deoxyribonuclease II
WBGene00006815	unc-83	unc-83 encodes a KASH domain-containing transmembrane protein; during development, UNC-83 is required for nuclear migrations in P cells, hyp7 hypodermal precursors, and intestinal cells and thus, for ventral nerve cord development, locomotion, and vulval formation; specifically, UNC-83 functions to recruit kinesin and dynein motor complexes to the nuclear envelope to regulate the directionality a…	8.38	Y			n/a	n/a	n/a
WBGene00009769	F46B6.4	none available	8.37				ENSG00000178605	GTPBP6	GTP binding domain
WBGene00009770	F46B6.5	none available	8.37				n/a	n/a	n/a
WBGene00002074	ima-3	ima-3 encodes one of three C. elegans importin alpha nuclear transport factors and the importin alpha that is most similar to the alpha3-subtype; ima-3 activity is required throughout development: during oogenesis, ima-3 is essential for progression past pachytene of meiotic prophase I and for proper organization of the nuclear pore complex (NPC) as well as association of P granules with the NPC;…	8.36	Y		Y	ENSG00000196911	KPNA5	Armadillo
WBGene00022791	ZK686.1	none available	8.36			Y	n/a	n/a	n/a
WBGene00013878	atfs-1	atfs-1 encodes a bZip transcription factor; ATFS-1 is required for the mitochondrial unfolded protein response (UPRmt); in wild-type animals, ATFS-1 is imported into the mitochondria and degraded, but in response to perturbed mitchondrial protein folding and decreased mitochondrial import efficiency, some ATFS-1 accumulates in the cytosol and then, traffics to the nucleus.	8.35	Y			n/a	n/a	n/a
WBGene00012117	T28B11.1	T28B11.1 encodes a protein containing an F-box, a motif predicted to mediate protein-protein interactions either with homologs of yeast Skp1 or with other proteins; about 5% to 15% of T28B11.1 transcripts are RNA edited to change A to G resulting in a change to residue 369 from an K to a E.	8.35				n/a	n/a	n/a
WBGene00020732	T23E7.2	none available	8.34	Y			n/a	n/a	n/a
WBGene00014039	ZK662.2	none available	8.34				n/a	n/a	n/a
WBGene00001538	gcy-12	gcy-12 encodes a membrane guanylyl cyclase; a gcy-12::GFP reporter is expressed in the PHA neurons as well as in a number of head sensory neurons including AFD, AWC, and ASE; when expressed in COS-M6 cells, GCY-12 exhibits temperature-dependent guanylyl cyclase activity.	8.33	Y			ENSG00000169418	NPR1	Adenylyl cyclase class-3/4/guanylyl cyclase
WBGene00016028	flp-24	none available	8.32				n/a	n/a	n/a
WBGene00019719	M01H9.3	none available	8.32	Y			n/a	n/a	n/a
WBGene00006433	sdhb-1	sdhb-1 encodes the C. elegans ortholog of human succinate dehydrogenase subunit B (SDHB; OMIM:185470, mutations lead to extraadrenal pheochromocytoma) which contains several iron-sulfur (Fe-S) clusters and functions to transfer electrons from the A (SDHA) subunit to the membrane-associated C (SDHC) subunit; RNAi screens indicate that sdhb-1 activity is essential for embryonic and larval developme…	8.32	Y	Y		ENSG00000117118	SDHB	2Fe-2S ferredoxin-type iron-sulfur binding domain
WBGene00006820	unc-89	unc-89 encodes several protein isoforms variably characterized by the presence or absence of SH3, DH, PH, immunoglobulin and myosin light chain kinase (MLCK)-like protein kinase domains; during development, unc-89 is required for proper organization of A bands in striated muscle and thus for fully normal locomotion, pharyngeal muscle contractions, and body size; unc-89 is expressed in body wall m…	8.32	Y	Y		ENSG00000072195	SPEG	Dbl homology (DH) domain
WBGene00009692	F44E5.5	F44E5.5 encodes a member of the Hsp70 family of heat shock proteins; as loss of F44E5.5 activity via large-scale RNAi screens results in no obvious defects, the precise role of F44E5.5 in C. elegans development and/or behavior is not yet known.	8.31	Y		Y	ENSG00000226704	HSPA1L	Heat shock protein 70 family
WBGene00001458	flp-15	flp-15 encodes two FMRFamide-related short peptide neurotransmitter; the precise roles for these peptides in C. elegans neurotransmission are not yet known.	8.31	Y			n/a	n/a	n/a
WBGene00008857	timm-23	F15D3.7 encodes the C. elegans ortholog of the mitochondrial import inner membrane translocase subunit Tim23; by homology, F15D3.7 is predicted to function in transit peptide-containing proteins across the mitochondrial inner membrane.	8.31		Y		ENSG00000204152	TIMM23B	Mitochondrial inner membrane translocase subunit Tim17/Tim22/Tim23/peroxisomal protein PMP24
WBGene00018963	ucr-1	none available	8.3				ENSG00000105819	PMPCB	Peptidase M16, C-terminal
WBGene00020908	VC5.2	none available	8.3				ENSG00000106780	MEGF9	EGF-like domain
WBGene00010339	acl-1	acl-1 encodes a glycerol-3-phosphate acyltransferase; ACL-1 is predicted to be a membrane protein that plays a role in phospholipid biosynthesis; acl-1 expression decreases gradually throughout aging.	8.29		Y		ENSG00000236873	AGPAT1	Phospholipid/glycerol acyltransferase
WBGene00019888	btbd-10	none available	8.29	Y			ENSG00000112078	KCTD20	BTB/POZ domain
WBGene00010325	exos-3	none available	8.29				ENSG00000107371	EXOSC3	K Homology domain, type 1
WBGene00017778	nono-1	nono-1 encodes an ortholog of Drosophila NONA and of human NONO (OMIM:300084) and SFPQ (OMIM: 605199); fly NONA and human NONO are putative DNA- or RNA-binding proteins required for normal rhythmic behaviors; fly NONA is also required for embryonic development and visual behavior, and forms a complex with the mRNA export factor NXF1.	8.29	Y			ENSG00000147140	NONO	RNA recognition motif domain
WBGene00007135	cdk-12	none available	8.28	Y			ENSG00000167258	CDK12	Protein kinase domain
WBGene00022580	iglr-2	none available	8.27				ENSG00000168140	VASN	Immunoglobulin-like domain
WBGene00022583	mrps-18A	none available	8.27				ENSG00000096080	MRPS18A	Ribosomal protein S18
WBGene00022754	nspd-1	none available	8.26				n/a	n/a	n/a
WBGene00021868	atln-1	none available	8.25	Y			ENSG00000128482	RNF112	Guanylate-binding protein, C-terminal
WBGene00001340	etr-1	etr-1 encodes a muscle-specific ELAV-type RNA-binding protein, whose homologs include Drosophila ELAV and human CUG-BINDING PROTEIN (CUGBP1; OMIM:601074); etr-1 function is required for embryonic muscle development, which suggests that ETR-1"s homology to CUG-BP (implicated in myotonic dystrophy) might reflect conserved roles in development.	8.24	Y	Y		ENSG00000140488	CELF6	RNA recognition motif domain
WBGene00008973	F20D1.1	none available	8.24	Y			ENSG00000280479	CACFD1	TVP18/Calcium channel flower
WBGene00017816	F26B1.2	none available	8.24	Y			ENSG00000165119	HNRNPK	K Homology domain
WBGene00003091	lys-2	lys-2 is one of ten C. elegans lysozyme genes; as such, lys-2 can be predicted to have a role in lysozymal function including immune function.	8.24				n/a	n/a	n/a
WBGene00006479	tmbi-4	none available	8.24				ENSG00000178719	GRINA	Bax inhibitor 1-related
WBGene00021852	Y54F10AM.8	none available	8.24	Y			ENSG00000151176	PLBD2	Phospholipase B-like
WBGene00015894	acdh-2	acdh-2 encodes a short-chain acyl-CoA dehydrogenase; ACDH-2 is predicted to be a mitochondrial enzyme that catalyzes the first step of fatty acid beta-oxidation and thus plays a key role in energy production; steady-state acdh-2 mRNA levels are under the control of the MDT-15 mediator complex subunit; in addition, gene expression studies indicate that acdh-2 expression is downregulated in fasted …	8.22				ENSG00000196177	ACADSB	Acyl-CoA oxidase/dehydrogenase, central domain
WBGene00016659	C45B2.2	none available	8.22				n/a	n/a	n/a
WBGene00002096	ins-13	ins-13 encodes an insulin-like peptide of the insulin superfamily of proteins (OMIM:176730, 147440); INS-13 is one of 38 insulin-like peptides in C. elegans, and the precise role of INS-13 in C. elegans development is not yet clear.	8.22				n/a	n/a	n/a
WBGene00004169	pqn-89	The protein product of this gene is predicted to contain a glutamine/asparagine (Q/N)-rich ("prion") domain, by the algorithm of Michelitsch and Weissman (as of the WS77 release of WormBase, i.e., in wormpep77).	8.22				n/a	n/a	n/a
WBGene00020099	R144.11	none available	8.22			Y	n/a	n/a	n/a
WBGene00000415	ced-1	ced-1 encodes a single-pass transmembrane protein homologous to human CD91, a low density lipoprotein receptor; CED-1 is a component of the apoptotic pathway and functions to initiate a signaling pathway in phagocytic cells that promotes cell corpse engulfment, phagosome maturation as evidenced by enrichment of PtdIns(3)P, DYN-1, and RAB-5 on phagosomal surfaces and, ultimately, apoptotic cell de…	8.21				ENSG00000162591	MEGF6	EGF-like domain
WBGene00010444	magi-1	magi-1 encodes a multi PDZ-domain containing tight junction-associated protein: MAGIs are members of vertebrate membrane associated guanylate-kinase (MAGUK) family (OMIM: 602625); MAGI-1/S-SCAM is also a broadly conserved synaptic scaffolding molecule; MAGI-1 is a component of a protein complex that functions as an organizer which maintains special segregation of different adhesion complexes into…	8.21	Y			ENSG00000269313	MAGIX	WW domain
WBGene00014066	rev-1	none available	8.2			Y	ENSG00000135945	REV1	UmuC domain
WBGene00000650	col-74	none available	8.19				ENSG00000206561	COLQ	Nematode cuticle collagen, N-terminal
WBGene00002078	xpo-1	xpo-1 encodes exportin-1, an importin-beta-like protein orthologous to Drosophila, vertebrate, and yeast exportin-1/CRM1; XPO-1 is predicted to function as a nuclear export receptor for proteins containing leucine-rich nuclear export signals; in C. elegans, XPO-1 is essential for embryogenesis and larval development, and may also be required for normal body morphology and postembryonic growth rat…	8.19	Y			ENSG00000082898	XPO1	Importin-beta, N-terminal domain
WBGene00012908	Y46G5A.18	none available	8.19				ENSG00000198858	R3HDM4	R3H domain
WBGene00000301	cav-1	cav-1 encodes one of two C. elegans caveolin orthologs; cav-1 is required for viability and Ras/MAP-kinase-dependent progression through the meiotic cell cycle; CAV-1 is expressed in the adult germ line and during embryonic development; CAV-1::GFP localizes to cortical granules that function to secrete chondroitin and mucin-like proteoglycans to the extracellular space following fertilization.	8.18	Y		Y	ENSG00000105971	CAV2	Caveolin
WBGene00019971	ergo-1	ergo-1 encodes an Argonaute protein; ERGO-1 is required for somatic gene regulation via the production or stabilization of endogenous (endo)-siRNAs, specifically the initial class of endo-siRNAs which are 26-nt, 5"-monophosphorylated, 5"-G-enriched antisense siRNAs; ERGO-1 activity is also required for the subcellular redistribution of the NRDE-3 Argonaute protein which, upon binding secondary si…	8.18	Y			n/a	n/a	n/a
WBGene00016706	C46C11.3	none available	8.14		Y		n/a	n/a	n/a
WBGene00009237	F28H7.3	none available	8.14				n/a	n/a	n/a
WBGene00017979	F32B5.6	none available	8.14	Y			n/a	n/a	n/a
WBGene00022425	plst-1	none available	8.13	Y			ENSG00000120756	PLS1	Calponin homology domain
WBGene00020738	T23F2.5	none available	8.13	Y			n/a	n/a	n/a
WBGene00015619	C08G9.1	none available	8.12				n/a	n/a	n/a
WBGene00018898	F55F10.1	none available	8.12			Y	ENSG00000112159	MDN1	von Willebrand factor, type A
WBGene00010425	lpin-1	lpin-1 encodes a putative phosphatidic acid phosphatase orthologous to budding yeast PAH1 and human LPIN1 (OMIM:605518), LPIN2 (OMIM:605519, mutated in Majeed syndrome), and LPIN3 (OMIM:605520); lpin-1 is expressed in vulval muscle; in mass RNAi assays, lpin-1 is required for the osmotic integrity of eggs and for normal larval growth, body thickness, locomotion, and fertility; by orthology, LPIN-…	8.12	Y			ENSG00000134324	LPIN1	Lipin, N-terminal
WBGene00008860	rmo-1	rmo-1 encodes a small (82-residue) protein, orthologous to human C20orf52/ROMO1 and budding yeast Mgr2p, that is required for viability and fertility; by orthology with C20orf52/ROMO1, rmo-1 is predicted to be a mitochondrial protein inducing the synthesis of reactive oxygen species (ROS) from the mitochondrial respiratory chain and (indirectly, via ROS production) promoting cell division.	8.11	Y			ENSG00000125995	ROMO1	Romo1/Mgr2
WBGene00022348	Y82E9BR.16	none available	8.11				ENSG00000004809	SLC22A16	Major facilitator, sugar transporter-like
WBGene00022822	ZK813.3	none available	8.11	Y			n/a	n/a	n/a
WBGene00003950	pbs-4	pbs-4 encodes a B-type subunit of the 26S proteasome"s 20S protease core particle; by homology, PBS-4 is predicted to function in ATP/ubiquitin-dependent nonlysosomal protein degradation; loss of pbs-4 activity via RNAi indicates that, in C. elegans, PBS-4 is required for embryonic, germline, and larval development.	8.1			Y	ENSG00000126067	PSMB2	Proteasome, subunit alpha/beta
WBGene00004914	snr-1	snr-1 encodes an ortholog of human small nuclear ribonucleoprotein Sm D3, a protein that forms part of a heptameric complex required for the biogenesis and function of the snRNPs that catalyze mRNA splicing; in combination with the gene that encodes the human Sm B ortholog (snr-2) snr-1 affects embryonic viability and the nuclear association and localization of P granules in embryos based on an R…	8.1	Y			ENSG00000100028	SNRPD3	LSM domain, eukaryotic/archaea-type
WBGene00020347	ech-1.2	ech-1.2 encodes one of two C. elegans enoyl-CoA hydratases/long-chain 3-hydroxyacyl-CoA dehydrogenases [EC:4.2.1.17 1.1.1.211] orthologous to human HADHA (hydroxyacyl-coenzyme A dehydrogenase/3-ketoacyl-coenzyme A thiolase/enoyl-coenzyme a hydratase (trifunctional protein), alpha subunit OMIM:600890), which when mutated leads to disease.	8.09				ENSG00000113790	EHHADH	Crotonase superfamily
WBGene00001993	hpd-1	hpd-1 encodes a putative 4-hydroxyphenylpyruvate dioxygenase required for normally short lifespan and for negative regulation of the dauer larval stage, with loss of hpd-1 function prolonging lifespan and promoting dauer formation; hpd-1 is a (perhaps evolutionarily conserved) target of transcriptional activation by DAF-16; HPD-1 is orthologous to human HPD (OMIM:609695, mutated in tyrosinemia ty…	8.09	Y			ENSG00000158104	HPD	Glyoxalase/fosfomycin resistance/dioxygenase domain
WBGene00019504	K07H8.2	K07H8.2 encodes, by alternative splicing, three isoforms of an ortholog of human SLC41A1 (OMIM:610801) and bacterial MgtE; like its orthologs, K07H8.2 is predicted to transport Mg(2+) into cells; K07H8.2 is paralogous to ZK185.2 and ZK1053.6; K07H8.2 is expressed in intestine, but has no obvious function in mass RNAi assays.	8.09	Y			ENSG00000114544	SLC41A3	SLC41 divalent cation transporters, integral membrane domain
WBGene00003752	nlp-14	none available	8.09	Y			n/a	n/a	n/a
WBGene00018072	nprl-3	none available	8.09				ENSG00000103148	NPRL3	Nitrogen permease regulator 3
WBGene00003953	pbs-7	pbs-7 encodes a B-type subunit of the 26S proteasome"s 20S protease core particle; by homology, PBS-7 is predicted to function in ATP/ubiquitin-dependent nonlysosomal protein degradation; loss of pbs-7 activity via large-scale RNAi screens indicates that, in C. elegans, PBS-7 is required for normal movement and for embryonic, germline, and larval development.	8.09	Y	Y		ENSG00000159377	PSMB4	Proteasome, subunit alpha/beta
WBGene00019503	tbce-1	K07H8.1 encodes a putative tubulin chaperone cofactor orthologous to human TBCE (OMIM:604934, mutated in HRD), and paralogous to COEL-1 and human TBCEL (LRRC35; OMIM:610451); K07H8.1 is required for normally short lifespan and for embryonic viability.	8.09				ENSG00000282984	TBCE	CAP Gly-rich domain
WBGene00010665	K08E3.5	none available	8.08	Y	Y		ENSG00000169764	UGP2	UDPGP family
WBGene00011124	sdz-27	none available	8.07			Y	n/a	n/a	n/a
WBGene00012188	W01G7.4	none available	8.07			Y	ENSG00000103061	SLC7A6OS	Transcription factor Iwr1
WBGene00007689	C18E9.9	none available	8.06				n/a	n/a	n/a
WBGene00010303	cri-3	none available	8.06	Y		Y	ENSG00000108561	C1QBP	Mitochondrial glycoprotein
WBGene00013728	Y111B2A.2	none available	8.06				n/a	n/a	n/a
WBGene00013729	Y111B2A.3	none available	8.06				n/a	n/a	n/a
WBGene00006816	unc-84	unc-84 encodes an inner nuclear membrane protein that contains a SUN domain with homology to S. pombe Sad1 and is paralogous to sun-1; SUN proteins include Drosophila Klaroid and CG6589, and mammalian SUN1, SUN2, SUN3 and Spag4; SUN-domain proteins bind lamins and the KASH domain proteins of the outer nuclear membrane; UNC-84 affects nuclear migration and anchoring of various cell types together …	8.05				ENSG00000164744	SUN3	SUN domain
WBGene00001520	gas-1	The gas-1 gene encodes a 49 kDa subunit of mitochondrial complex I that is required for oxidative phosphorylation, resistance to volatile anesthetics, fecundity, and normal lifespan; gas-1 is expressed in the nematode neuromuscular system; its subcellular distribution appears to be mitochondrial; drug effects on mutants versus wild-type indicate that gas-1 functions at least partially through pre…	8.03	Y	Y		ENSG00000158864	NDUFS2	NADH-quinone oxidoreductase, subunit D
WBGene00001851	hif-1	hif-1 encodes an ortholog of the mammalian hypoxia-induced factor HIF-1, and is required for survival in hypoxic environments (1% oxygen) that have no effect on wild-type C. elegans.	8.03	Y	Y		ENSG00000159263	SIM2	PAS domain
WBGene00011291	R102.4	none available	8.03	Y			ENSG00000087495	PHACTR3	Aromatic amino acid beta-eliminating lyase/threonine aldolase
WBGene00011292	R102.5	none available	8.03	Y	Y		n/a	n/a	n/a
WBGene00004804	skn-1	skn-1 encodes a bZip transcription factor orthologous to the mammalian Nrf (Nuclear factor-erythroid-related factor) transcription factors; during early embryogenesis, maternally provided SKN-1 is required for specification of the EMS blastomere, a mesendodermal precursor that gives rise to pharyngeal, muscle, and intestinal cells; later, during postembryonic development, SKN-1 functions in the p…	8.03	Y			ENSG00000123405	NFE2	Basic leucine zipper domain, Maf-type
WBGene00017217	F07F6.4	none available	8.02				ENSG00000242247	ARFGAP3	Arf GTPase activating protein
WBGene00017220	F07F6.8	none available	8.02			Y	n/a	n/a	n/a
WBGene00002244	laf-1	laf-1 encodes a DEAD-box RNA helicase; laf-1 is required for embryonic development and sex determination; laf-1 was identified in screens for dominant suppressors of the sterility produced by gain-of-function fem-3 mutations; when homozygous, laf-1 mutations result in embryonic and larval lethality and when heterozygous, feminization of XX and XO animals; reporter gene analyses indicate that wild…	8.02				ENSG00000152670	DDX4	Helicase, C-terminal
WBGene00019628	pup-2	pup-2 encodes a template-independent poly(U) polymerase with 3"" end RNA substrates, orthologous to human ZCCHC6 and ZCCHC11, and paralogous to CID-1; like its paralog CID-1, PUP-2 is required for normally rapid growth and normally short lifespan; pup-2(RNAi) animals are slow-growing and abnormally long-lived; PUP-2 is paralogous to the GLD-2 family of poly(A) polymerases.	8.02	Y			ENSG00000164329	PAPD4	PAP/25A-associated
WBGene00006369	sym-4	sym-4 encodes a large (1,043-residue) protein that is required for viability in a mec-8 mutant background, and is also required by itself for normally rapid growth and locomotion; SYM-4 is orthologous to human WDR44, and has a nondescript N-terminal domain, with a C-terminal domain containing seven WD repeats; SYM-4 is broadly expressed, in larval and adult pharynx, digestive tract, neurons, vulv…	8.02	Y			ENSG00000131725	WDR44	WD40 repeat
WBGene00006423	asd-2	asd-2 encodes, by alternative splicing, three isoforms of a signal transduction and activation of RNA (STAR protein) orthologous to human QKI (OMIM:609590) and Drosophila HOW, and paralogous to C. elegans GLD-1; ASD-2 is required for normal axonal guidance, developmentally regulated mRNA splicing, and correct protein folding in vivo; ASD-2 is required for the mutually exclusive splicing of let-2 …	8.01	Y			ENSG00000112531	QKI	K Homology domain
WBGene00011501	rmd-1	none available	8.01	Y		Y	ENSG00000137824	RMDN3	Tetratricopeptide-like helical domain
WBGene00011428	T04C12.3	none available	8.01			Y	n/a	n/a	n/a
WBGene00006713	ubc-18	ubc-18 encodes an E2 ubiquitin-conjugating enzyme related to human UBCH7 (OMIM:603731); UBC-18 activity is required for normal growth and reproduction, and UBC-18 functions redundantly with LIN-35/Rb and other class B synthetic multivulval (SynMuv) gene products to regulate pharyngeal morphogenesis during embryonic development; ubc-18 transcripts are detected in the germline, embryos, late larval…	8.01	Y			ENSG00000279392	n/a	Ubiquitin-conjugating enzyme E2
WBGene00009888	F49E2.5	none available	8	Y			ENSG00000159450	TCHH	Protein of unknown function DUF612
WBGene00007666	C18B12.4	none available	7.99				ENSG00000105428	ZNRF4	Zinc finger, RING-type
WBGene00017775	F25B5.3	F25B5.3 is orthologous to the human gene NUCLEOTIDASE, 5-PRIME, CYTOSOLIC III (NT5C3; OMIM:606224), which when mutated leads to hemolytic anemia due to UMPH1 deficiency	7.99				n/a	n/a	n/a
WBGene00009691	F44E5.4	F44E5.4 encodes a member of the Hsp70 family of heat shock proteins; as loss of F44E5.4 activity via large-scale RNAi screens results in no obvious defects, the precise role of F44E5.4 in C. elegans development and/or behavior is not yet known.	7.99	Y			ENSG00000226704	HSPA1L	Heat shock protein 70 family
WBGene00004374	rme-2	rme-2 encodes a member of the low-density lipoprotein (LDL) receptor superfamily; RME-2 functions as the C. elegans yolk receptor whose activity is required for yolk uptake during oogenesis; RME-2 is expressed in developing oocytes where it localizes at or near the cell surface.	7.98				ENSG00000197324	LRP10	LDLR class B repeat
WBGene00003451	msp-58	msp-58 encodes a protein that belongs to a family of proteins called the Major Sperm Proteins (MSPs) that is conserved in nematodes; this family consists of closely related, small, basic proteins that make up 15% of sperm protein; this multigene family consists of over fifty genes, including many pseudogenes; MSPs are involved in both extracellular signaling and cytoskeletal functions during repr…	7.97				n/a	n/a	n/a
WBGene00001229	eif-3.F	none available	7.96	Y			ENSG00000279081	n/a	JAB1/MPN/MOV34 metalloenzyme domain
WBGene00001699	grd-10	grd-10 encodes a hedgehog-like protein, with an N-terminal signal sequence and a C-terminal Ground domain; GRD-10 is expressed in seam cells; the Ground domain is predicted to form a cysteine-crosslinked protein involved in intercellular signalling, and it has subtle similarity to the N-terminal Hedge domain of HEDGEHOG proteins; GRD-10 is weakly required for normal molting; GRD-10 is also requir…	7.96				n/a	n/a	n/a
WBGene00013352	lon-8	lon-8 encodes a secreted protein, conserved among nematodes, that inhibits body elongation during larval and early adult growth, probably by limiting cell size rather than nuclear ploidy or cell number; LON-8 is also required for normal ray morphology in the male tail, but not for superficially normal male mating, suggesting a role in cuticle retraction; LON-8 is strongly expressed in the hypoder…	7.96				n/a	n/a	n/a
WBGene00003826	ntl-3	ntl-3 is the ortholog of NOT3/NOT5, a member of a protein complex also predicted to contain ccf-1/Y56A3A.20 (CAF1/POP2); ntl-3 is required for embryonic viability in mass RNAi assays.	7.96	Y			ENSG00000277615	CNOT3	CCR4-Not complex component, Not N-terminal domain
WBGene00004744	scp-1	scp-1 encodes PTC-related protein that contains a sterol-sensing domain related to human Sterol regulatory element binding protein (SREBP) cleavage activating protein.	7.96	Y			ENSG00000114650	SCAP	Sterol-sensing domain
WBGene00016201	tdo-2	none available	7.95	Y		Y	ENSG00000262635	TDO2	Tryptophan 2,3-dioxygenase
WBGene00003423	msi-1	none available	7.94	Y		Y	ENSG00000153944	MSI2	RNA recognition motif domain
WBGene00003948	pbs-2	none available	7.94		Y		ENSG00000261884	n/a	Peptidase T1A, proteasome beta-subunit
WBGene00015354	snet-1	none available	7.94				n/a	n/a	n/a
WBGene00003795	npp-9	none available	7.93				ENSG00000196862	RGPD4	Ran binding domain
WBGene00004768	sel-11	sel-11 encodes an E3 ubiquitin ligase; sel-11 was identified in screens for mutations that suppress the egg-laying defective (Egl) phenotype of a hypomorphic lin-12 allele; sel-11 mutations also suppress the temperature-sensitive, maternal-effect embryonic lethality of a glp-1 partial loss-of-function allele; SEL-11 functions as an ER E3 ubiquitin ligase that plays a role in the unfolded protein …	7.93	Y			ENSG00000162298	SYVN1	Zinc finger, RING-type
WBGene00021170	arx-4	arx-4 also called as p34Arc encodes a subunit of the actin related protein of the conserved Arp2/3 complex, with 60% amino acid similarity with the homologous genes from human (OMIM: 604224); arx-4 is an essential gene as disruption in the expression by RNAi results in embryonic arrest due to ventral enclosure during morphogenesis; Arp2/3 depletion results in partial shrinking of the Ea/p apical …	7.92			Y	ENSG00000163466	ARPC2	Actin-related protein 2/3 complex subunit 2
WBGene00044273	nspa-6	none available	7.92				n/a	n/a	n/a
WBGene00006472	tag-123	none available	7.92	Y			ENSG00000101337	TM9SF4	Nonaspanin (TM9SF)
WBGene00007499	C09H10.5	none available	7.91				n/a	n/a	n/a
WBGene00018731	F53A9.8	none available	7.91	Y		Y	n/a	n/a	n/a
WBGene00003923	pas-2	pas-2 encodes a proteasome subunit with highest similarity to vertebrate proteasome alpha 2 subunits.	7.91	Y	Y	Y	ENSG00000256646	n/a	Proteasome alpha-subunit, N-terminal domain
WBGene00001309	emr-1	emr-1 gene encodes a homolog of the human integral nuclear membrane protein emerin ; EMR-1 belongs to a family of proteins sharing the LEM-domain (LAP2-Emerin-MAN1 domain) that are generally conserved in metazoa and bind to lamin; EMR-1, along with another LEM-domain protein, LEM-2 is required for larval development, normal life-span, nuclear envelope and chromatin organization, chromosome segreg…	7.9	Y			n/a	n/a	n/a
WBGene00019978	hacd-1	none available	7.9			Y	ENSG00000138796	HADH	3-hydroxyacyl-CoA dehydrogenase, C-terminal
WBGene00014666	C05D12.3	none available	7.89	Y			n/a	n/a	n/a
WBGene00008768	F13G3.10	none available	7.89		Y	Y	ENSG00000140264	SERF2	n/a
WBGene00001033	dnj-15	This gene encodes a protein containing a DnaJ ("J") domain.	7.88	Y			ENSG00000100209	HSCB	DnaJ domain
WBGene00001716	grl-7	grl-7 encodes a hedgehog-like protein, with an N-terminal signal sequence, a central low-complexity region, and a C-terminal Ground-like (Grl) domain; GRL-7 is expressed in intestine, hypodermis, and seam cells; the Grl domain is predicted to form a cysteine-crosslinked protein involved in intercellular signalling, and it has subtle similarity to the N-terminal Hedge domain of HEDGEHOG proteins.	7.88				n/a	n/a	n/a
WBGene00004754	sec-23	sec-23 encodes a component of COPII (coat protein complex II)-coated vesicles orthologous to Saccharomyces cerevisiae Sec23p; by homology, SEC-23 is predicted to be involved in endoplasmic reticulum (ER)-to-Golgi transport; loss of sec-23 activity results in defects in oogenesis, morphogenesis, and extracellular matrix secretion; a SEC-23::GFP fusion protein localizes to the apical region of the …	7.88			Y	ENSG00000101310	SEC23B	von Willebrand factor, type A
WBGene00002000	hrp-2	none available	7.87	Y			ENSG00000256453	DND1	RNA recognition motif domain
WBGene00010478	K01G5.5	The K01G5.5 gene encodes an ortholog of human DYSKERIN (DKC1; OMIM:300126), which when mutated leads to X-linked dyskeratosis congenita (OMIM:305000); the K01G5.5 protein is predicted to be mitochondrial with 68% accuracy.	7.87	Y			ENSG00000165832	TRUB1	PUA domain
WBGene00013034	tat-1	tat-1 encodes one of six C. elegans subfamily IV P-type ATPase that, by sequence similarity, is proposed to function as an aminophospholipid translocase (flippase); TAT-1 activity is required for regulating phosphatidylserine asymmetry on the plasma membrane and thus, for regulation of phagocytic engulfment of cells; in addition, TAT-1 activity is required for phosphatidylserine transport across …	7.87	Y			ENSG00000130270	ATP8B3	P-type ATPase
WBGene00022749	ZK484.3	none available	7.87	Y			n/a	n/a	n/a
WBGene00044113	C54F6.15	none available	7.86				n/a	n/a	n/a
WBGene00010450	K01A11.2	none available	7.86				ENSG00000171806	METTL18	Lysine methyltransferase
WBGene00019732	M02D8.6	none available	7.86				n/a	n/a	n/a
WBGene00012015	T25B9.9	none available	7.86				ENSG00000142657	PGD	6-phosphogluconate dehydrogenase, decarboxylating
WBGene00012216	W02D9.10	none available	7.86	Y			n/a	n/a	n/a
WBGene00020937	W02D3.12	none available	7.85				ENSG00000154079	SDHAF4	Protein of unknown function DUF1674
WBGene00021843	Y54E10BR.4	none available	7.85	Y			ENSG00000141101	NOB1	Nin one binding (NOB1) Zn-ribbon-like
WBGene00003400	dapk-1	dapk-1 encodes the C. elegans ortholog of the tumor suppressor death-associated protein (DAP) kinase; dapk-1 functions in epidermal cells to regulate epithelial damage responses; specifically dapk-1 acts as a negative regulator of barrier repair and the TIR-1-mediated innate immune response to wounding; dapk-1 also functions downstream of, or in parallel to, muscarinic signaling in the regulation…	7.84	Y		Y	ENSG00000167657	DAPK3	Death domain
WBGene00003982	pes-9	pes-9 encodes a zinc metallopeptidase; pes-9 was originally identified in a promoter trap screen for sequences that direct reporter gene expression in specific cell types during C. elegans development; pes-9 sequences direct expression in a limited number of cells in the early embryo and in putative head and tail hypodermal cells in adults; after some confusion, the pes-9 reporter gene fusion was…	7.84				ENSG00000150656	CNDP1	Peptidase M20
WBGene00022280	Y74C10AL.2	none available	7.84				ENSG00000263160	TMEM50B	Uncharacterised protein family UPF0220
WBGene00016663	C45E1.4	none available	7.83				n/a	n/a	n/a
WBGene00001714	grl-5	grl-5 encodes a hedgehog-like protein, with an N-terminal signal sequence, a central proline-rich low-complexity region, and a C-terminal Ground-like (Grl) domain; the Grl domain is predicted to form a cysteine-crosslinked protein involved in intercellular signalling, and it has subtle similarity to the N-terminal Hedge domain of HEDGEHOG proteins.	7.83				n/a	n/a	n/a
WBGene00002024	hsp-43	hsp-43 encodes a member of the hsp20 family.	7.82	Y			ENSG00000276076	n/a	Alpha crystallin/Heat shock protein
WBGene00000210	asg-2	asg-2 encodes a homolog of subunit G of the membrane-bound F0 proton channel portion of ATP synthase (mitochondrial respiratory chain [MRC] complex V); asg-2 activity is required for growth at a normally high rate and for normal osmoregulation; in addition, asg-2 activity is required for response to hermaphrodite contact, the first step in a series of stereotypical male mating behaviors; an ASG-2…	7.81	Y	Y		ENSG00000249222	ATP5L2	ATPase, F0 complex, subunit G, mitochondrial
WBGene00001595	gld-1	gld-1 encodes a protein containing a K homology (KH) RNA binding domain; GLD-1 is required for regulation of the mitosis/meiosis decision during germline development (promotion of meiotic entry) in parallel with gld-2, gld-3, and nos-3 and also affects spermatogenesis; GLD-1 physically interacts with the 3"- and 5"UTR of its putative mRNA targets in vitro to negatively regulate their translation;…	7.81	Y	Y		ENSG00000112531	QKI	K Homology domain
WBGene00003636	nhr-46	none available	7.81	Y			n/a	n/a	n/a
WBGene00022450	ubc-26	none available	7.81	Y			ENSG00000160087	UBE2J2	Ubiquitin-conjugating enzyme E2
WBGene00012245	W04D2.6	W04D2.6 encodes, by alternative splicing, two isoforms of an ortholog of human RBM25 (RED120); W04D2.6 is required (in conjunction with RSP-6) for normally rapid growth and (in conjunction with CPF-1 and F59A2.4) for oogenesis and embryonic viability; the long isoform of W04D2.6 has both an N-terminal RNA recognition domain (RRM) that is isoform-specific, and a C-terminal nucleic acid-binding dom…	7.81	Y			ENSG00000119707	RBM25	RNA recognition motif domain
WBGene00012765	Y41E3.7	none available	7.81			Y	ENSG00000100580	TMED8	Acyl-CoA-binding protein, ACBP
WBGene00019249	H28G03.1	none available	7.8	Y			ENSG00000177733	HNRNPA0	RNA recognition motif domain
WBGene00019250	H28G03.2	none available	7.8	Y			n/a	n/a	n/a
WBGene00019381	K04C2.3	none available	7.8	Y			n/a	n/a	n/a
WBGene00019479	K07C11.7	K07C11.7 encodes one of three C. elegans metallophoshopesterase that are related to human 239FB, which is encoded by a gene in the 11p13-p14 chromosomal region associated with various tumors and WAGR (Wilms" tumor, aniridia, genitourinary anomalies, and mental retardation) syndrome.	7.79				ENSG00000186732	MPPED1	Calcineurin-like phosphoesterase domain, apaH type
WBGene00004134	myrf-1	myrf-1 encodes a protein with a glutamine/asparagine-rich domain, orthologous to human MYRF (myelin regulatory factor); in C. elegans, MYRF-1 activity is required for regulation of the molting cycle, specifically the completion of larval molts and cessation of molting in reproductively mature adult animals; a MYRF-1::GFP fusion protein is expressed in a wide variety of cells and tissues, includin…	7.79	Y			ENSG00000124920	MYRF	p53-like transcription factor, DNA-binding
WBGene00000636	col-60	none available	7.78	Y			ENSG00000133661	SFTPD	Nematode cuticle collagen, N-terminal
WBGene00003941	pbo-1	pbo-1 encodes a calcium binding protein with homology to calcineurin; pbo-1 was identified in screens for mutations that disrupt the normal defecation cycle; a pbo-1 mutation results in weak or absent posterior body contractions, the first step in the defecation cycle; pbo-1 mutant animals are also slow growing and constipated.	7.78				ENSG00000088992	TESC	EF-hand domain
WBGene00008948	F19B6.1	none available	7.77				ENSG00000094841	UPRT	Uridine kinase-like
WBGene00006733	ufd-1	ufd-1 encodes the C. elegans ortholog of Saccharomyces cerevisiae Ufd1p, a protein that is part of the Cdc48/Ufd1/Npl4 complex that mediates endoplasmic reticulum (ER)-associated protein degradation; loss of ufd-1 function via RNAi results in increased sensitivity to ER stress indicating that, like its yeast ortholog, ufd-1 plays a role in ER-associated protein degradation; ufd-1 is also essentia…	7.77		Y		ENSG00000070010	UFD1	Ubiquitin fusion degradation protein UFD1
WBGene00021443	Y39A3CL.7	none available	7.77	Y			n/a	n/a	n/a
WBGene00015683	C10G8.4	C10G8.4 encodes a putative secreted TIL-domain protease inhibitor paralogous to SWM-1, ISL-1, and the products of 11 other C. elegans genes; C10G8.4 and its relatives are collectively similar to other TIL-domain protease inhibitors from nematodes, insects, and vertebrates; C10G8.4 has no obvious function in mass RNAi assays.	7.76				n/a	n/a	n/a
WBGene00000379	cct-4	cct-4 encodes a putative delta subunit of the eukaryotic cytosolic ("T complex") chaperonin, orthologous to human CCT4 (OMIM:605142); CCT-4 represses SKN-1-dependent transcription of gst-4; CCT-4 is expressed in pharynx, pharyngeal gland cells, intestine, renal gland cells, and neurons; CCT-4 is expressed in touch receptor neurons in a MEC-3-dependent fashion.	7.76		Y		ENSG00000115484	CCT4	Chaperonin Cpn60/TCP-1 family
WBGene00013366	Y60A3A.21	none available	7.76				n/a	n/a	n/a
WBGene00022119	copa-1	Y71F9AL.17 encodes an alpha subunit of the coatomer (COPI) complex; in mass RNAi assays, Y71F9AL.17 is required for embryonic viability, fertility, normal locomotion, and normally rapid growth.	7.75				ENSG00000122218	COPA	WD40 repeat
WBGene00007017	mdt-17	none available	7.75			Y	ENSG00000284057	n/a	n/a
WBGene00011736	T12D8.9	none available	7.75	Y	Y		n/a	n/a	n/a
WBGene00012920	Y46G5A.35	none available	7.75				ENSG00000125652	ALKBH7	Alpha-ketoglutarate-dependent dioxygenase AlkB-like
WBGene00004465	rpn-9	rpn-9 is predicted to encode a non-ATPase subunit of the 19S regulatory complex of the proteasome that that affects body morphology, embryonic viability, locomotion, larval viability, fertility, and growth; interacts with RPN-11 in yeast two-hybrid assays.	7.74	Y			ENSG00000185627	PSMD13	Proteasome component (PCI) domain
WBGene00011119	R07E5.13	This gene encodes a homolog of mammalian BRAIN PROTEIN 44-LIKE (BRP44L).	7.73			Y	ENSG00000238205	MPC1L	Mitochondrial pyruvate carrier
WBGene00021078	unc-132	none available	7.73	Y			n/a	n/a	n/a
WBGene00007750	syg-2	syg-2 encodes a transmembrane protein that is a member of the immunoglobulin superfamily of proteins; during larval development, SYG-2 activity is required in vulval epithelial cells for proper synaptic specificity of the HSNL neuron; in regulating synapse formation, SYG-2 acts as a guidepost protein for the SYG-1 receptor that interacts with SYG-2 and acts within HSNL to regulate synaptic specif…	7.72		Y		ENSG00000161270	NPHS1	Immunoglobulin subtype 2
WBGene00022363	Y92H12BL.1	none available	7.72				ENSG00000101391	CDK5RAP1	TRAM domain
WBGene00007969	acs-19	none available	7.71	Y		Y	ENSG00000154930	ACSS1	AMP-dependent synthetase/ligase
WBGene00002020	hsp-16.49	hsp-16.49 encodes a 16-kD heat shock protein (HSP) that is a member of the hsp16/hsp20/alphaB-crystallin (HSP16) family of heat shock proteins, and that is identical to the protein encoded by hsp-16.48; HSP-16.49 is likely to function as a passive ligand temporarily preventing unfolded proteins from aggregating.	7.71	Y		Y	ENSG00000170276	HSPB2	Alpha crystallin/Heat shock protein
WBGene00013343	prp-6	none available	7.71				ENSG00000101161	PRPF6	HAT (Half-A-TPR) repeat
WBGene00015741	C13F10.1	none available	7.7		Y		n/a	n/a	n/a
WBGene00008686	F11A10.5	none available	7.7				ENSG00000007341	ST7L	ST7
WBGene00001428	fkb-3	fkb-3 encodes a peptidylprolyl cis/trans isomerase homologous to mammalian FK506 immunosuppressant-binding protein 9; FKB-3 expression is positively regulated by signaling through the DAF-2 insulin receptor-like pathway and the activity of the DAF-16 fork-head transcription factor suggesting that FKB-3 could play a role in metabolism and longevity; however, as loss of FKB-3 function via RNA-media…	7.7	Y			ENSG00000134285	FKBP11	FKBP-type peptidyl-prolyl cis-trans isomerase domain
WBGene00012829	Y43F8C.7	none available	7.7			Y	ENSG00000161671	EMC10	ER membrane protein complex subunit 10
WBGene00006053	ssq-4	none available	7.69				ENSG00000049540	ELN	n/a
WBGene00013789	Y116A8C.9	none available	7.69				ENSG00000269556	TMEM185A	Transmembrane Fragile-X-F-associated protein
WBGene00044468	Y69A2AL.2	none available	7.69			Y	ENSG00000170890	PLA2G1B	Phospholipase A2
WBGene00016027	C23H5.8	none available	7.68				n/a	n/a	n/a
WBGene00000812	csk-1	csk-1 encodes an ortholog of C-terminal Src kinase (Csk) that probably inhibits SRC-like tyrosine kinases in pharyngeal muscle cells; the C-terminal tyrosines of the SRC-like kinases SRC-2/KIN-22 and SRC-1 are evolutionarily conserved, and phosphorylated by CSK-1, which inhibits SRC-2/KIN-22 and SRC-1 in vivo; csk-1 is co-expressed with src-2/kin-22 and src-1 in pharyngeal procorpus and metacorpu…	7.68			Y	ENSG00000007264	MATK	SH2 domain
WBGene00019001	ipgm-1	ipgm-1 encodes an experimentally confirmed cofactor-independent phosphoglycerate mutase that is essential for embryonic and larval viability, and for normal body morphology; paradoxically, ipgm-1 is also required for normally short lifespan (in mass RNAi screens for Age phenotypes); IPGM-1 exhibits phosphoglycerate mutase activity when expressed in vitro; ipgm-1 is expressed widely in larvae and …	7.68	Y			n/a	n/a	n/a
WBGene00020507	vha-15	vha-15 encodes an ortholog of subunit H of the cytoplasmic (V1) domain of vacuolar proton-translocating ATPase (V-ATPase); VHA-15 and VHA-18 are co-orthologs; VHA-15, along with VHA-2 and probably all V-ATPase subunits, is required for systemic RNAi, probably during endocytotic RNAi uptake; VHA-15 is a predicted cytosolic stator (stalk) component; neurons).	7.68	Y		Y	ENSG00000047249	ATP6V1H	ATPase, V1 complex, subunit H
WBGene00008856	F15D3.6	none available	7.67	Y			ENSG00000186314	PRELID2	PRELI/MSF1 domain
WBGene00001454	flp-11	none available	7.67				n/a	n/a	n/a
WBGene00004138	pqn-53	The protein product of this gene is predicted to contain a glutamine/asparagine (Q/N)-rich ("prion") domain, by the algorithm of Michelitsch and Weissman (as of the WS77 release of WormBase, i.e., in wormpep77).	7.67	Y		Y	n/a	n/a	n/a
WBGene00021854	Y54F10AR.1	none available	7.67	Y			ENSG00000174238	PITPNA	Phosphatidylinositol transfer protein
WBGene00007000	tufm-1	none available	7.66	Y			ENSG00000178952	TUFM	Transcription factor, GTP-binding domain
WBGene00007720	C25D7.10	none available	7.65	Y		Y	n/a	n/a	n/a
WBGene00020082	gcp-2.1	none available	7.65				ENSG00000134612	n/a	PA domain
WBGene00007718	otub-1	none available	7.65	Y	Y		ENSG00000277276	OTUB2	Ubiquitin thioesterase Otubain
WBGene00022194	Y71H2B.4	none available	7.65			Y	n/a	n/a	n/a
WBGene00000283	cah-5	cah-5 encodes a member of the carbonic anhydrase family.	7.64	Y	Y	Y	ENSG00000167434	CA4	Alpha carbonic anhydrase
WBGene00001177	egl-8	egl-8 encodes a phospholipase C beta; egl-8 activity is required for pharyngeal pumping, defecation, activity levels, and innate immunity; egl-8 is genetically downstream of egl-30 with respect to aldicarb-induced paralysis, and is expressed in most or all neurons, with the strongest staining in the head and tail ganglia, and in the intestine.	7.64	Y		Y	ENSG00000182621	PLCB1	C2 domain
WBGene00015083	egg-1	egg-1 encodes a LDL-receptor repeat-containing protein that is required for fertilization; egg-1 acts redundantly with a similar protein, egg-2, and both proteins are expressed in the developing oocyte; egg-1 is not required for male fertility; egg-1 localizes to the oocyte plasma membrane; the structure and localization of the egg-1 protein suggest that it is required together with egg-2, for ga…	7.63	Y		Y	ENSG00000197324	LRP10	Low-density lipoprotein (LDL) receptor class A repeat
WBGene00004984	spn-4	spn-4 encodes a protein containing an RNP-type RNA-binding domain; SPN-4 is required for rotation, but not polarization, of the mitotic spindle in the P1 blastomere of the two-cell stage embryo; SPN-4 is also required for mesectoderm and mesendoderm formation in conjunction with proper localization of maternal cell-fate determinants such as SKN-1; in addition, SPN-4 binds the glp-1 3" UTR and is …	7.63	Y			ENSG00000167281	RBFOX3	RNA recognition motif domain
WBGene00021277	Y23H5B.6	Y23H5B.6 encodes a DEAD-box helicase; loss of Y23H5B.6 activity via RNAi indicates that Y23H5B.6 activity is required for positive regulation of growth rate, reproduction, and embryonic and larval development.	7.63				ENSG00000178105	DDX10	Helicase, C-terminal
WBGene00002226	klp-16	klp-16 encodes a C-terminal motor kinesin orthologous to the Drosophila melanogaster Ncd and Saccharomyces cerevisiae Kar3; however KLP-16 along with KLP-3, KLP-15 and KLP-17 form an unique subgroup based on amino acid sequence and secondary structure analysis; klp-16 is involved in development of the nervous system in embryos and in chromosome segregation; in situ RNA hybridization experiments i…	7.62				ENSG00000237649	KIFC1	Kinesin motor domain
WBGene00002717	let-526	let-526 encodes a homolog of a component of the SWI/SNF complex; the let-526(h185) mutation results in early larval lethality.	7.62				ENSG00000117713	ARID1A	ARID DNA-binding domain
WBGene00009624	cnc-8	cnc-8 encodes one of eleven C. elegans caenacin peptides.	7.61				n/a	n/a	n/a
WBGene00008764	dylt-1	dylt-1 encodes a putative dynein light chain subunit that inhibits DHC-1 in vivo, but is otherwise dispensable for viability; DYLT-1 is paralogous to DYLT-3, and orthologous to human DYNLT1 and DYNLT3 (OMIM: 300302); dylt-1(RNAi) and dylt-1(ok417) both suppress the lethality of conditional dhc-1 mutations, and dylt-1(RNAi) suppresses dhc-1(or195) spindle length and cytokinesis defects as well, in…	7.6	Y			ENSG00000146425	DYNLT1	Tctex-1
WBGene00008763	F13G3.3	none available	7.6				n/a	n/a	n/a
WBGene00019354	K03B4.2	none available	7.6	Y			n/a	n/a	n/a
WBGene00012033	T26C5.3	none available	7.6				ENSG00000169359	SLC33A1	Major facilitator superfamily domain
WBGene00006392	taf-10	none available	7.6	Y			ENSG00000166337	TAF10	Transcription initiation factor TFIID, 23-30kDa subunit
WBGene00219456	ZK822.10	none available	7.6				n/a	n/a	n/a
WBGene00009664	idha-1	F43G9.1 encodes the C. elegans homolog of the alpha subunit of an NAD+-dependent mitochondrial isocitrate dehydrogenase; by homology, the product of F43G9.1 is predicted to catalyze the formation of alpha-ketoglutarate from isocitrate as part of the citric acid cycle.	7.59	Y	Y		ENSG00000166411	IDH3A	Isocitrate and isopropylmalate dehydrogenases family
WBGene00006770	unc-34	unc-34 encodes an EVH1 domain-containing protein that is the sole C. elegans Enabled/VASP homolog; during development, unc-34 activity is required for proper cell migration and axon guidance and for normal locomotion and posterior body morphology; in regulating axon guidance, genetic analyses suggest that unc-34 likely functions downstream of slt-1/Slit and sax-3/Robo as well as unc-6/Netrin and …	7.59	Y		Y	ENSG00000125753	VASP	WH1/EVH1 domain
WBGene00009645	F42G10.1	F42G10.1 encodes a neprilysin; neprilysins are thermolysin-like zinc metallopeptidases, found on the outer surface of animal cells, that negatively regulate small signalling peptides (e.g., enkephalin, tachykinin, insulin, and natriuretic peptides) by cleaving them; F42G10.1 has no clear orthologs in other organisms.	7.58		Y		n/a	n/a	n/a
WBGene00006805	unc-73	unc-73 encodes a guanine nucleotide exchange factor (GNEF) similar to the Trio protein; UNC-73 is required for vulval morphogenesis, for the migration of QL, QR, CAN, and hypodermal P cells, the commissure outgrowth of D type motoneurons, and amphid axon outgrowth; UNC-73 has GNEF activity for both CED-10 and MIG-2 in vitro; the requirement for UNC-73 in P cell migration can be suppressed by tran…	7.58	Y	Y		ENSG00000240771	ARHGEF25	Dbl homology (DH) domain
WBGene00000366	cbp-1	cbp-1 encodes a homolog of the mammalian transcriptional cofactors CBP (OMIM:600140) and p300 (E1A-BINDING PROTEIN, 300-KD; OMIM:602700) that have been shown to possess histone acetyltransferase activity, and which, when mutated, lead to Rubinstein-Taybi syndrome (OMIM:180849) and colorectal cancer (OMIM:114500); at least one splicing form of CBP-1 exhibits histone acetyltransferase (HAT) activit…	7.57	Y		Y	ENSG00000100393	EP300	Zinc finger, TAZ-type
WBGene00018819	rog-1	rog-1 encodes a protein with an insulin receptor substrate-1 (IRS-type) phosphotyrosine-binding (PTB) domain that is required for the progression from pachytene to diakinesis in meiosis; rog-1 is primarily transcribed in germ cells, and this expression is required for oocyte development; ROG-1 is orthologous to human FRS2 (OMIM:607743) and FRS3 (OMIM:607744); rog-1(tm1031) mutant oocytes fail to …	7.57				ENSG00000166225	FRS2	IRS-type PTB domain
WBGene00015484	atgl-1	none available	7.56	Y			ENSG00000180316	PNPLA1	Patatin/Phospholipase A2-related
WBGene00000252	bli-2	A cuticle collagen involved in strut assembly in the adult cuticle.	7.56			Y	ENSG00000019169	MARCO	Nematode cuticle collagen, N-terminal
WBGene00001629	gly-4	gly-4 encodes a UDP-GalNAc:polypeptide N-acetylgalactosaminyltransferase; GLY-4 exhibits UDP-GalNAc:polypeptide N-acetylgalactosaminyltransferase activity in vitro.	7.56				ENSG00000158089	GALNT14	Ricin B, lectin domain
WBGene00006705	ubc-8	none available	7.56			Y	ENSG00000186591	UBE2H	Ubiquitin-conjugating enzyme E2
WBGene00012362	W09D10.4	none available	7.56	Y		Y	ENSG00000196850	PPTC7	PPM-type phosphatase domain
WBGene00013275	btb-14	none available	7.54	Y	Y		n/a	n/a	n/a
WBGene00001441	fkh-9	fkh-9 encodes a member of the forkhead domain transcription factor family.	7.54	Y			ENSG00000111206	FOXM1	Fork head domain
WBGene00000532	clh-5	The clh-5 gene encodes a chloride channel, whose human homologs include CLC1 and CLCN5; the latter homolog is imvolved in receptor-mediated endocytosis.	7.53				ENSG00000171365	CLCN5	CBS domain
WBGene00015778	got-2.2	none available	7.53	Y	Y		ENSG00000120053	GOT1	Aspartate/other aminotransferase
WBGene00013740	hut-1	hut-1 encodes a nucleotide sugar transporter that is related to members of the solute carrier 35B1 (SLC35B1) subfamily of SLC35 transporters; HUT-1 activity is required for proper organization of the endoplasmic reticulum and for normal larval development; in the intestine, HUT-1 localizes to the endoplasmic reticulum and the Golgi apparatus.	7.53	Y			ENSG00000157593	SLC35B2	UAA transporter
WBGene00003230	mex-5	mex-5 encodes a novel protein that contains two CCCH zinc finger motifs; maternally provided MEX-5, which functions partly redundantly with the highly similar CCCH finger protein MEX-6, is essential for transducing polarity cues and establishing soma/germline asymmetry in the early embryo; in regulating soma/germline asymmetry, MEX-5 interacts with, and activates, the SOCS-box protein ZIF-1, whic…	7.53	Y			n/a	n/a	n/a
WBGene00010778	gpdh-2	gpdh-2 encodes one of two C. elegans glycerol 3-phosphate dehydrogenases; although loss of gpdh-2 activity via large-scale RNAi screens results in no obvious defects, expression of a gpdh-2 cDNA in Saccharomyces cerevisiae hog1 mutants is able to rescue the high osmolarity-sensitive growth phenotype of these mutants, suggesting that gpdh-2 encodes a functional glycerol 3-phosphate dehydrogenase.	7.52	Y	Y		ENSG00000152642	GPD1L	Glycerol-3-phosphate dehydrogenase, NAD-dependent, C-terminal
WBGene00020379	T09B4.5	none available	7.52	Y			n/a	n/a	n/a
WBGene00006648	ttb-1	none available	7.52				ENSG00000137947	GTF2B	Transcription factor TFIIB
WBGene00022434	Y108G3AL.2	none available	7.52				ENSG00000134186	PRPF38B	Pre-mRNA-splicing factor 38
WBGene00003834	nxf-1	nxf-1 encodes a homolog of human TAP protein, a member of the NXF family of shuttling transport receptors for nuclear export of mRNA; binds RNA directly and its function has been shown to be conserved with the NXF family.	7.51	Y		Y	ENSG00000269405	NXF2	TAP C-terminal (TAP-C) domain
WBGene00006730	uev-1	uev-1 encodes a ubiquitin-conjugating enzyme (UBC or E2) variant that contains the characteristic UBC motif, but lacks the critical active-site cysteine residue necessary for catalytic activity; UEV-1 activity is required cell autonomously for normal trafficking of the GLR-1 glutamate receptor and consequently, for normal locomotory behavior; UEV-1 physically interacts with the UBC-13 ubiquitin c…	7.51	Y			ENSG00000169139	UBE2V2	Ubiquitin-conjugating enzyme E2
WBGene00012850	Y44A6C.1	none available	7.51	Y	Y		n/a	n/a	n/a
WBGene00000863	cya-1	cya-1 encodes an A-type cyclin; loss of cya-1 via RNAi results in sterility but no defects in embryonic cell divisions, or embryonic lethality, is observed; CYA-1 is predicted to be a substrate of germ-line MPK-1/ERK activity that functions to regulate oocyte organization and differentiation.	7.5				ENSG00000157456	CCNB2	Cyclin, C-terminal domain
WBGene00001855	hil-4	none available	7.5				ENSG00000189060	H1F0	Linker histone H1/H5, domain H15
WBGene00004130	ketn-1	ketn-1 encodes an ortholog of kettin (in D. melanogaster, SALLIMUS), an invertebrate isoform or paralog of titin; ketn-1 is transcriptionally upregulated two-fold by hypoxia, requires both HIF-1 and VHL-1 for this induction, and contains three predicted HIF-1 binding sites in its predicted 5" regulatory region; ketn-1"s induction by hypoxia correlates with upregulation of other genes required for…	7.5	Y	Y		ENSG00000072195	SPEG	Immunoglobulin subtype 2
WBGene00020581	T19D12.6	none available	7.5	Y			ENSG00000188157	AGRN	Laminin G domain
WBGene00000292	cap-1	cap-1 encodes an F-actin capping protein alpha subunit that affects fertility; likely expressed in touch receptor neurons.	7.49				ENSG00000177938	CAPZA3	F-actin-capping protein subunit alpha
WBGene00017053	D2024.5	none available	7.49				n/a	n/a	n/a
WBGene00045038	F13G11.3	none available	7.49				n/a	n/a	n/a
WBGene00000070	acy-3	acy-3 encodes a predicted member of the adenylyl cyclase family with highest similarity to human adenylate cyclase type 5; expressed in the support cells of ciliated neurons, in the head and tail ganglia, in two pairs of neurons in the retrovesicular ganglia, and in the spermatheca.	7.48		Y		ENSG00000164742	ADCY1	Adenylyl cyclase class-3/4/guanylyl cyclase
WBGene00020246	clic-1	none available	7.48	Y		Y	ENSG00000175416	CLTB	Clathrin light chain
WBGene00044342	T05B11.7	none available	7.48	Y		Y	n/a	n/a	n/a
WBGene00017342	F10D7.5	F10D7.5 encodes an ortholog of Drosophila NEURALIZED, and thus may participate in GLP-1/LIN-12 signalling; the promoter or 5" protein-coding regions of F10D7.5 are bound by DAF-16 in vivo, and F10D7.5 expression drops by roughly one-half in daf-16(mu86) mutants.	7.47	Y			ENSG00000163121	NEURL3	Zinc finger, RING-type
WBGene00018101	math-27	The F36H5.2 gene encodes a protein with a meprin-associated Traf homology (MATH) domain that may be involved in apoptosis.	7.47				n/a	n/a	n/a
WBGene00012543	nkcc-1	The Y37A1C.1 gene encodes a homolog of the human gene NKCC2, which when mutated leads to hypokalemicalkalosis (OMIM:241200); the Y37A1C.1A protein is predicted to be mitochondrial with 52% accuracy.	7.47				ENSG00000221955	SLC12A8	Amino acid permease/ SLC12A domain
WBGene00011181	R09H10.3	R09H10.3 is orthologous to the human gene TRANSTHYRETIN (PREALBUMIN, AMYLOIDOSIS TYPE I) (TTR; OMIM:176300), which when mutated leads to disease.	7.47	Y			ENSG00000118271	TTR	Transthyretin/hydroxyisourate hydrolase
WBGene00007016	mdt-15	mdt-15 encodes, by alternative splicing, two isoforms of a Mediator subunit orthologous to human MED15 (OMIM:607372, deleted in DiGeorge syndrome); together with NHR-49 and SBP-1, MDT-15 is required for normal fat accumulation, for expression of fatty acid (FA) desaturase genes (fat-5, fat-6, and fat-7), for normal levels of mono- and polyunsaturated FAs (PUFAs), and for viability, fecundity, mob…	7.46	Y		Y	ENSG00000099917	MED15	Mediator of RNA polymerase II transcription subunit 15
WBGene00011804	T16G12.3	none available	7.46				n/a	n/a	n/a
WBGene00044370	C41H7.9	none available	7.44				n/a	n/a	n/a
WBGene00000898	daf-2	daf-2 encodes a receptor tyrosine kinase that is the C. elegans insulin/IGF receptor ortholog; DAF-2 activity is required for a number of processes in C. elegans, including embryonic and larval development, formation of the developmentally arrested dauer larval stage (diapause), larval developmental timing, adult longevity, reproduction, fat storage, salt chemotaxis learning, and stress resistanc…	7.44	Y			ENSG00000171105	INSR	Receptor L-domain
WBGene00011034	paxt-1	none available	7.44	Y			n/a	n/a	n/a
WBGene00011032	R05D11.4	none available	7.44	Y			ENSG00000277594	DDX52	Helicase, C-terminal
WBGene00011037	R05D11.9	none available	7.44				n/a	n/a	n/a
WBGene00001457	flp-14	flp-14 encodes four copies of a single FMRFamide-related short peptide neurotransmitter; FLP-14 can increase pharyngeal action potential frequency, although its exact role in C. elegans neurotransmission is not yet clear.	7.43	Y			n/a	n/a	n/a
WBGene00011102	R07E3.1	none available	7.43			Y	ENSG00000172543	CTSW	Peptidase C1A, papain C-terminal
WBGene00011604	T08A11.1	none available	7.43	Y			ENSG00000100150	DEPDC5	DEP domain
WBGene00015633	C09D4.2	none available	7.42		Y	Y	n/a	n/a	n/a
WBGene00017641	csr-1	csr-1 encodes, by alternative splicing, two isoforms of an Argonaute protein required for chromosome segregation, embryonic viability, Slicer activity induced by secondary siRNAs, and (partially) for germline RNAi; csr-1(RNAi) embryos are generally inviable, with disordered metaphase chromosomes and anaphase DNA bridges; CSR-1 is found in secondary-type siRNA/Slicer complexes, and isolated recomb…	7.42			Y	n/a	n/a	n/a
WBGene00012559	epg-3	none available	7.42	Y			ENSG00000062716	VMP1	n/a
WBGene00018181	F38E1.9	none available	7.42				ENSG00000129255	MPDU1	PQ-loop repeat
WBGene00005003	spp-18	none available	7.42				n/a	n/a	n/a
WBGene00008366	tpra-1	none available	7.41	Y			ENSG00000163870	TPRA1	Transmembrane protein adipocyte-associated 1
WBGene00008419	wdr-23	wdr-23 encodes a WD40 repeat-containing protein; WDR-23 functions as part of a CUL-4/DDB-1 ubiquitin ligase complex that negatively regulates accumulation and hence, transcriptional activation activity of the SKN-1 transcription factor in intestinal nuclei; wdr-23 activity is thus required for regulation of stress resistance, longevity, and normal growth and development; WDR-23 physically interac…	7.41	Y			ENSG00000259371	n/a	WD40 repeat
WBGene00001064	dpy-2	The dpy-2 gene encodes an unusual cuticular collagen that is required for maintaining the normal body length of the animal in later larval stages; dpy-2 interacts with other cuticular collagens such as dpy-10 and sqt-1, and suppresses mutations in glp-1, mup-1, and emb-5.	7.4	Y			ENSG00000019169	MARCO	Nematode cuticle collagen, N-terminal
WBGene00010007	F53H4.2	none available	7.4				n/a	n/a	n/a
WBGene00019402	K04G7.11	none available	7.4	Y		Y	ENSG00000117614	SYF2	mRNA splicing factor SYF2
WBGene00004390	rnp-7	none available	7.4	Y			ENSG00000184209	SNRNP35	RNA recognition motif domain
WBGene00013391	Y62H9A.3	none available	7.4				n/a	n/a	n/a
WBGene00012277	ccch-3	none available	7.39				n/a	n/a	n/a
WBGene00004132	ifet-1	none available	7.39			Y	ENSG00000184708	EIF4ENIF1	Eukaryotic translation initiation factor 4E binding protein
WBGene00010234	ttr-50	none available	7.39	Y			n/a	n/a	n/a
WBGene00017720	F22F7.2	none available	7.38				ENSG00000143653	SCCPDH	Saccharopine dehydrogenase, NADP binding domain
WBGene00017814	F26A10.2	F26A10.2 encodes a protein with four zinc-finger domains and a glutamine/asparagine-rich domain, that is required for maintenance of the germline and for locomotion; F26A10.2(RNAi) animals are uncoordinated and have sterile progeny.	7.38	Y			ENSG00000141946	ZIM3	Zinc finger C2H2-type/integrase DNA-binding domain
WBGene00022855	tcer-1	none available	7.38	Y		Y	ENSG00000176769	TCERG1L	WW domain
WBGene00000617	col-40	col-40 encodes a cuticle collagen protein that belongs to the col-6 cuticle collagen family; col-40 transcript is present in L1 larvae and at the L2d-dauer molt.	7.37	Y		Y	ENSG00000019169	MARCO	Nematode cuticle collagen, N-terminal
WBGene00016162	crh-2	none available	7.36	Y			ENSG00000143578	CREB3L4	Basic-leucine zipper domain
WBGene00016677	C45G9.6	none available	7.35				n/a	n/a	n/a
WBGene00008601	F09A5.4	F09A5.4 encodes one of three C. elegans proteins orthologous to members of the MOB (Mps One Binder) family of proteins, a group of highly conserved proteins that function as binding partners and co-activators of NDR/LATS protein kinases; in metazoans, MOB proteins are core components of the Hippo signaling pathway that regulates cell proliferation and survival.	7.35	Y			ENSG00000182208	MOB2	MOB kinase activator family
WBGene00002218	klp-6	klp-6 encodes a predicted monomeric kinesin and member of the UNC-104 family.	7.35				ENSG00000130294	KIF1A	C2 domain
WBGene00000865	cyb-1	cyb-1 encodes a cyclin B homolog that appears to be required both for embryogenesis (via maternally encoded CYB-1) and for postembryonic development and fertility (via zygotically encoded CYB-1); removing maternal product in cyb-1(RNAi) embryos causes multiple nuclei, and affected embryos arrest development at an early embryonic stage.	7.34				ENSG00000145386	CCNA2	Cyclin, C-terminal domain
WBGene00006579	tlk-1	tlk-1 encodes, through alternative splicing, two isoforms of a Tousled-class serine/threonine protein kinase; TLK-1A/B are orthologous to Tousled from A. thaliana; tlk-1(RNAi) embryos have, compared to normal embryos, reduced phosphorylation of the RNA polymerase II C-terminal domain at Serine-2 and methylation of histone H3 at Lysine-36 (posttranslational modifications associated with transcript…	7.34	Y			ENSG00000226049	n/a	Protein kinase domain
WBGene00022381	ubxn-2	ubxn-2 encodes one of six C. elegans UBX (ubiquitin regulatory X) domain-containing proteins.	7.33	Y			ENSG00000173960	UBXN2A	UBX domain
WBGene00009521	F38A1.8	none available	7.32	Y			ENSG00000182934	SRPRA	Signal recognition particle, SRP54 subunit, GTPase domain
WBGene00001075	dpy-14	dpy-14 encodes a type III (alpha 1) collagen that is required for embryonic, larval, and vulval development, proper amphid morphology, and regulation of body shape and size; a dpy-14 promoter-GFP fusion construct is reportedly expressed in embryonic neurons.	7.31				ENSG00000019169	MARCO	Nematode cuticle collagen, N-terminal
WBGene00020509	hex-1	hex-1 encodes a beta-N-acetylhexosaminidase that is orthologous to the human gene CERVICAL CANCER PROTO-ONCOGENE 7 (HEXB; OMIM:606873), which when mutated leads to disease.	7.31			Y	ENSG00000260729	n/a	Glycoside hydrolase, catalytic domain
WBGene00004075	pod-1	The pod-1 gene encodes a coronin-like protein required for asymmetry along the anterior-posterior axis at the beginning of embryonic development.	7.31	Y			ENSG00000282725	CORO7	WD40 repeat
WBGene00004268	rab-5	rab-5 encodes the C. elegans Rab5 GTPase ortholog; RAB-5 activity is required for receptor-mediated yolk endocytosis and for phagosome maturation involved in apoptotic cell clearance; rab-5 mutations also affect localization of P granules and PAR-2, as well as the cytoplasmic appearance of cells in the early embryo and larval development; RAB-5 localizes to early endosomes and maturing phagosomes.	7.31	Y			ENSG00000124209	RAB22A	Small GTPase superfamily
WBGene00016987	CC8.2	none available	7.3		Y		ENSG00000219607	PPP1R3G	CBM21 (carbohydrate binding type-21) domain
WBGene00012316	ctps-1	none available	7.3			Y	ENSG00000047230	CTPS2	CTP synthase
WBGene00018361	F42G8.10	none available	7.3			Y	ENSG00000147123	NDUFB11	NADH:ubiquinone oxidoreductase, ESSS subunit
[truncated: 1,018 more rows]

## Sheet: protein_coding_sharewBlazie
WBgene	alias	description	set12_cuff_median	Blazie	Fox	Kotagama
WBGene00021350	Y37E3.8	none available	15351.1	21.35		Y
[truncated: 1,417 more rows]

## Sheet: RNA Binding Domain
WBgene	alias	description	set12_cuff_median	Blazie	Fox	Kotagama
[truncated: 206 more rows]

[truncated: 6 more sheets: Transcription Factors, lincRNAs, snoRNAs, ncRNAs, snRNAs, miRNAs]
