# Supplementary material for: An updated C. elegans nuclear body muscle transcriptome for studies in muscle formation and function
Source: Skelet Muscle. 2023 Mar 2;13:4. doi: 10.1186/s13395-023-00314-2 (PMC9979539; doi:10.1186/s13395-023-00314-2)
Supplement: Supplementary file 4 — Additional file 4: Supplemental Table S3. miRNA target prediction of the 16 miRNAs identified in this study using the miRanda algorithm. [file 13395_2023_314_MOESM4_ESM.xlsx]

## Sheet: miRanda prediction STRINGENT 
miRNA	WBGene target	Name	Pairing Score	Energy Score	Description
cel-miR-241-5p	WBGene00011304	mnk-1	288	-37.69	mnk-1 encodes the C. elegans ortholog of the Mnk MAP kinase-interacting kinase
cel-miR-241-5p	WBGene00000912	daf-16	445	-44.08	daf-16 encodes the sole C. elegans forkhead box O (FOXO) homologue; DAF-16 functions as a transcription factor that acts in the insulin/IGF-1-mediated signaling (IIS) pathway that regulates dauer formation, longevity, fat metabolism, stress response, and innate immunity; DAF-16 regulates these various processes through isoform-specific expression, isoform-specific regulation by different AKT kina…
cel-miR-241-5p	WBGene00007646	nkb-1	292	-41.89	none available
cel-miR-241-5p	WBGene00003003	lin-14	748	-104.42	lin-14 encodes a novel protein whose activity is required for specifying the division timings of a specific group of cells during postembryonic development; lin-14 loss-of-function mutations result in the premature appearance of later larval lineages, while gain-of-function mutations result in reiteration of L1 larval stages lineages; in addition, lin-14 acts as a positive regulator of AVM, PVM, …
cel-miR-241-5p	WBGene00012435	flh-1	308	-44.12	none available
cel-miR-241-5p	WBGene00003826	ntl-3	157	-24.07	ntl-3 is the ortholog of NOT3/NOT5, a member of a protein complex also predicted to contain ccf-1/Y56A3A.20 (CAF1/POP2); ntl-3 is required for embryonic viability in mass RNAi assays.
cel-miR-241-5p	WBGene00018285	smk-1	162	-19.69	smk-1 encodes a novel, evolutionarily conserved protein that is orthologous to the mammalian and Dictyostelium discoideum SMEK (suppressor of MEK null) proteins; smk-1 activity is essential for several aspects of DAF-16-mediated longevity namely, the defense response to pathogenic bacteria and increased resistance to oxidative and UV-induced damage; in regulating DAF-16 activity, SMK-1 appears to…
cel-miR-241-5p	WBGene00008121	C46F11.6	157	-19.15	none available
cel-miR-241-5p	WBGene00004739	scd-1	292	-35.75	scd-1 encodes a novel protein with several regions that are extremely glutamine (Q) rich, interspersed with other residues (usually alanine); SCD-1 affects signalling by proteins in the DAF-7/transforming growth factor (TGF)-beta pathway (DAF-1, DAF-8, and DAF-14), and the Q-rich regions of SCD-1 protein may mediate epigenetic changes of stably heritable tertiary conformation.
cel-miR-230-3p	WBGene00020230	nep-2	157	-16.35	T05A8.4 encodes a neprilysin; neprilysins are thermolysin-like zinc metallopeptidases, found on the outer surface of animal cells, that negatively regulate small signalling peptides (e.g., enkephalin, tachykinin, insulin, and natriuretic peptides) by cleaving them; while T05A8.4 is an ortholog of mammalian neutral endopeptidase (NEP), expressed on the brush-border membranes of kidney; more genera…
cel-miR-230-3p	WBGene00009141	ncbp-2	161	-14.67	ncbp-2 encodes the C. elegans ortholog of the CBP20 subunit of the nuclear cap binding complex; by homology, NCBP-2 is predicted to play a role in mRNA decay; loss of ncbp-2 activity via RNAi indicates that this gene is essential for embryonic and larval development and in addition, plays a role in reproduction and vulval morphogenesis; staining of C. elegans embryos with an antibody to human CBP…
cel-miR-230-3p	WBGene00016913	lam-2	317	-32.84	lam-2 encodes a laminin gamma subunit; lam-2 activity is required for embryonic development and for regulation of muscle arm extension; loss of lam-2 function via large-scale RNAi screens results in embryonic, larval, and adult lethality, sterility, body morphology defects, and abnormal locomotion.
cel-miR-230-3p	WBGene00009532	ccch-1	307	-26.66	ccch-1 encodes a CCCH tandem zinc finger (TZF) protein; based upon its sequence similarity to human tristetraprolin and ERF-2 the product of F38B7.1 is predicted to function as an RNA-binding protein that specifically binds to UAUU repeats.
cel-miR-230-3p	WBGene00019628	pup-2	164	-18.36	pup-2 encodes a template-independent poly(U) polymerase with 3"" end RNA substrates, orthologous to human ZCCHC6 and ZCCHC11, and paralogous to CID-1; like its paralog CID-1, PUP-2 is required for normally rapid growth and normally short lifespan; pup-2(RNAi) animals are slow-growing and abnormally long-lived; PUP-2 is paralogous to the GLD-2 family of poly(A) polymerases.
cel-miR-230-3p	WBGene00006805	unc-73	160	-14.5	unc-73 encodes a guanine nucleotide exchange factor (GNEF) similar to the Trio protein; UNC-73 is required for vulval morphogenesis, for the migration of QL, QR, CAN, and hypodermal P cells, the commissure outgrowth of D type motoneurons, and amphid axon outgrowth; UNC-73 has GNEF activity for both CED-10 and MIG-2 in vitro; the requirement for UNC-73 in P cell migration can be suppressed by tran…
cel-miR-230-3p	WBGene00044698	K09F5.6	286	-21.23	none available
cel-miR-230-3p	WBGene00021626	rft-2	156	-15.1	none available
cel-miR-77-3p	WBGene00003003	lin-14	290	-34.51	lin-14 encodes a novel protein whose activity is required for specifying the division timings of a specific group of cells during postembryonic development; lin-14 loss-of-function mutations result in the premature appearance of later larval lineages, while gain-of-function mutations result in reiteration of L1 larval stages lineages; in addition, lin-14 acts as a positive regulator of AVM, PVM, …
cel-miR-5551-5p	WBGene00006781	unc-45	299	-25.93	unc-45 encodes a conserved, muscle-specific protein that contains an N-terminal TRP (tetratricopeptide repeat) and a C-terminal UCS (UNC-45-CRO1-She4p) domain; during body wall muscle development, UNC-45 activity is essential for proper thick filament formation and sarcomere organization; in addition, maternally provided UNC-45 is required for embryonic polarity, cytokinesis, and germline cellula…
cel-miR-5551-5p	WBGene00018512	trpp-8	160	-14.91	F46F11.9 encodes an ortholog of S. cerevisiae GSG1, involved in intracellular transport and meiosis; F46F11.9 shares an operon with vha-10, and thus might be a previously undescribed V-ATPase component or ancillary protein.
cel-miR-5551-5p	WBGene00008404	D2013.6	298	-32.37	none available
cel-miR-5551-5p	WBGene00044134	D1025.10	165	-27.08	none available
cel-miR-5551-5p	WBGene00022037	acs-13	294	-24.17	none available
cel-miR-5551-5p	WBGene00000277	cab-1	164	-16.56	Novel protein which has a C-terminal motif weakly homologous to mouse NPDC-1 and is involved in synaptic regulation; it is expressed in various neurons including ventral cord and tail ganglion neurons; it physically interacts with AEX-3, which is a guanine nucleotide exchange factor for the Rab3 GTPase.
cel-miR-5551-5p	WBGene00010408	mboa-2	297	-28.08	mboa-2 encodes a sterol O-acyltransferase orthologous to Drosophila MIDWAY, and to human DGAT1 (OMIM:604900); MBOA-2 has acyl-CoA:diacylglycerol O-acyltransferase activity when expressed in yeast; MBOA-2 has no obvious function in mass RNAi assays.
cel-miR-5551-5p	WBGene00000041	aco-2	156	-12.38	aco-2 encodes an aconitase homolog that is required for embryonic viability, fertility, locomotion, and vulval morphogenesis, and perhaps for normal lifespan.
cel-miR-5551-5p	WBGene00009812	suca-1	293	-16.75	none available
cel-miR-5551-5p	WBGene00002981	lgg-2	161	-16.93	lgg-2 encodes an ortholog of the autophagic budding yeast protein Atg8p; LGG-2 is also homologous the light chain 3 (LC3) subunit of the microtubule-associated proteins 1A and 1B (MAP1A and MAP1B); LGG-2 is predicted to associate with MAP1A and MAP1B and with microtubules and to perhaps play a role in regulating the microtubule-binding activity of MAP1A and MAP1B; LGG-2 has no obvious function in…
cel-miR-5551-5p	WBGene00003003	lin-14	297	-25.3	lin-14 encodes a novel protein whose activity is required for specifying the division timings of a specific group of cells during postembryonic development; lin-14 loss-of-function mutations result in the premature appearance of later larval lineages, while gain-of-function mutations result in reiteration of L1 larval stages lineages; in addition, lin-14 acts as a positive regulator of AVM, PVM, …
cel-miR-5551-5p	WBGene00000113	alh-7	440	-46.23	alh-7 encodes an ortholog of the human gene DJ73M23.2 (NAD+-DEPENDENT SUCCINIC SEMIALDEHYDE DEHYDROGENASE; ALDH5A1), which when mutated leads to SSADH deficiency (OMIM:271980).
cel-miR-5551-5p	WBGene00003777	nmy-2	160	-10.89	nmy-2 encodes a non-muscle myosin II; NMY-2 is required for polarized cytoplasmic flow, polarized distribution of the PAR proteins, cytokinesis, and for proper anterior-posterior polarity in early embryos; NMY-2 functions with PAR-5 in the onset of the establishment phase of polarization in the C. elegans zygote along the anterior-posterior axis, and nmy-2 is partially redundant with nmy-1 with r…
cel-miR-5551-5p	WBGene00006833	unc-108	294	-27.12	unc-108 encodes a small GTPase homologous to the Rab GTPases that function in endocytosis, membrane fusion, and vesicular trafficking events; unc-108 function is required in neurons for normal locomotion; unc-108 also functions in the removal of apoptotic cells, specifically it functions in engulfing cells for the recruitment and fusion of the lysosome to the phagosome; unc-108 is expressed in ne…
cel-miR-5551-5p	WBGene00019347	mbl-1	304	-37.44	mbl-1 encodes, by alternative splicing, two isoforms of a putative MUSCLEBLIND-type mRNA splicing regulator required in adults for normal muscle dense body organization, locomotion, and vulval morphogenesis; MBL-1 is orthologous to Drosophila MBL and human MBNL1 (OMIM:606516), MBNL2 (OMIM:607327), and MBNL3 (OMIM:300413); mbl-1 is transcribed in larvae and adults; mbl-1(RNAi) animals show protrud…
cel-miR-5551-5p	WBGene00010425	lpin-1	160	-19.47	lpin-1 encodes a putative phosphatidic acid phosphatase orthologous to budding yeast PAH1 and human LPIN1 (OMIM:605518), LPIN2 (OMIM:605519, mutated in Majeed syndrome), and LPIN3 (OMIM:605520); lpin-1 is expressed in vulval muscle; in mass RNAi assays, lpin-1 is required for the osmotic integrity of eggs and for normal larval growth, body thickness, locomotion, and fertility; by orthology, LPIN-…
cel-miR-5551-5p	WBGene00003400	dapk-1	294	-30.1	dapk-1 encodes the C. elegans ortholog of the tumor suppressor death-associated protein (DAP) kinase; dapk-1 functions in epidermal cells to regulate epithelial damage responses; specifically dapk-1 acts as a negative regulator of barrier repair and the TIR-1-mediated innate immune response to wounding; dapk-1 also functions downstream of, or in parallel to, muscarinic signaling in the regulation…
cel-miR-5551-5p	WBGene00004268	rab-5	283	-30.67	rab-5 encodes the C. elegans Rab5 GTPase ortholog; RAB-5 activity is required for receptor-mediated yolk endocytosis and for phagosome maturation involved in apoptotic cell clearance; rab-5 mutations also affect localization of P granules and PAR-2, as well as the cytoplasmic appearance of cells in the early embryo and larval development; RAB-5 localizes to early endosomes and maturing phagosomes.
cel-miR-5551-5p	WBGene00006407	lim-9	287	-22.75	lim-9 encodes a protein containing one PET domain and six LIM domains and is orthologous to Drosophila LIMPET and vertebrate FHL2; in vitro binding and yeast two-hybrid assays indicate that LIM-9 physically interacts with UNC-96 and UNC-97 and thus, is likely a component of a protein complex that links muscle focal adhesions to thick filaments; LIM-9 also enables Wnt-directed planar cell polarity…
cel-miR-5551-5p	WBGene00016158	ari-1	159	-14.28	none available
cel-miR-5551-5p	WBGene00000942	deb-1	299	-25.15	The deb-1 gene encodes a vinculin ortholog highly conserved amongst metazoans including Drosophila, chick, and humans (OMIM:193065); DEB-1 is a muscle attachment protein found in dense bodies, and is required for attaching actin thin filaments to the basal sarcolemma; DEB-1 requires PAT-4/integrin-linked kinase for full assembly into nascent attachments.
cel-miR-5551-5p	WBGene00003052	lmn-1	157	-19.55	lmn-1 encodes the sole C. elegans nuclear lamin; lmn-1 is an essential gene that is required for a number of nuclear processes, including chromatin organization, cell cycle progression, chromosome segregation, and nuclear pore complex spacing; LMN-1 is also required for nuclear envelope localization of EMR-1/Emerin during early development; LMN-1 localizes to the nuclear periphery of all cell typ…
cel-miR-5551-5p	WBGene00001496	frm-10	156	-11.46	frm-10 encodes a protein that contains an N-terminal FERM (Band 4.1-ezrin-radixin-moesin) domain; by homology, FRM-10 is predicted to function as a membrane-cytoskeleton linker protein that plays a role in cell adhesion, migration, or organization of cell surface structures; however, as loss of frm-10 activity via large-scale RNAi screens does not result in any obvious abnormalities, the precise …
cel-miR-34-5p	WBGene00007645	C17E4.6	302	-38.71	none available
cel-miR-34-5p	WBGene00001208	egl-44	159	-24.52	egl-44 encodes a transcription enhancer factor of the TEA domain (TEAD) class; egl-44 activity is required to repress the touch cell fate in some cells and to promote aspects of HSN differentiation; EGL-44 physically interacts with YAP-1, a C. elegans Yes-associated protein (YAP) homolog, and when co-expressed, the two proteins are able to activate a TEAD reporter; an EGL-44::GFP fusion protein i…
cel-miR-228-5p	WBGene00000465	cpg-1	160	-17.92	cpg-1 encodes, by alternative splicing, two isoforms of a chondroitin proteoglycan; CPG-1 contains three chitin-binding peritrophin-A domains and two mucin-like regions; CPG-1 is individually dispensable for normal embryonic development; however, CPG-1 and CPG-2 are jointly required for osmotic integrity of early embryos, error-free chromosomal segregation during meiosis, polar body extrusion, as…
cel-miR-228-5p	WBGene00006807	unc-75	168	-30.4	unc-75 encodes an RNA-binding protein with two N-terminal RNA recognition motifs (RRMs), a glutamine/asparagine-rich linker domain, and a third C-terminal RRM that is orthologous to the mammalian CELF/BrunoL proteins that control pre-mRNA splicing; UNC-75 is required for neuron-specific splicing of unc-32 mRNA; UNC-75 binds the unc-32 intron 7a in vitro; both UNC-75 and EXC-7 are required in para…
cel-miR-228-5p	WBGene00010408	mboa-2	159	-18.01	mboa-2 encodes a sterol O-acyltransferase orthologous to Drosophila MIDWAY, and to human DGAT1 (OMIM:604900); MBOA-2 has acyl-CoA:diacylglycerol O-acyltransferase activity when expressed in yeast; MBOA-2 has no obvious function in mass RNAi assays.
cel-miR-228-5p	WBGene00000113	alh-7	288	-30.99	alh-7 encodes an ortholog of the human gene DJ73M23.2 (NAD+-DEPENDENT SUCCINIC SEMIALDEHYDE DEHYDROGENASE; ALDH5A1), which when mutated leads to SSADH deficiency (OMIM:271980).
cel-miR-228-5p	WBGene00022286	rga-4	164	-16.34	rga-4 encodes a GTPase-activating protein (GAP); RNAi experiments predicted to target rga-4 and the related rga-3 gene result in early embryonic defects, specifically defects in cortical contractility, non-muscle myosin NMY-2 distribution, and the relative size of PAR protein domains; in vitro, RGA-4 positively regulates RHO-1 GTPase activity, consistent with genetic studies showing that the rga-…
cel-miR-228-5p	WBGene00001993	hpd-1	164	-21.13	hpd-1 encodes a putative 4-hydroxyphenylpyruvate dioxygenase required for normally short lifespan and for negative regulation of the dauer larval stage, with loss of hpd-1 function prolonging lifespan and promoting dauer formation; hpd-1 is a (perhaps evolutionarily conserved) target of transcriptional activation by DAF-16; HPD-1 is orthologous to human HPD (OMIM:609695, mutated in tyrosinemia ty…
cel-miR-228-5p	WBGene00000617	col-40	160	-16.87	col-40 encodes a cuticle collagen protein that belongs to the col-6 cuticle collagen family; col-40 transcript is present in L1 larvae and at the L2d-dauer molt.
cel-let-7-5p	WBGene00000912	daf-16	442	-44.71	daf-16 encodes the sole C. elegans forkhead box O (FOXO) homologue; DAF-16 functions as a transcription factor that acts in the insulin/IGF-1-mediated signaling (IIS) pathway that regulates dauer formation, longevity, fat metabolism, stress response, and innate immunity; DAF-16 regulates these various processes through isoform-specific expression, isoform-specific regulation by different AKT kina…
cel-let-7-5p	WBGene00006942	wrk-1	157	-15.82	wrk-1 encodes, by alternative splicing, at least three isoforms of a GPI-anchored immunoglobulin superfamily (IgSF) protein orthologous to Drosophila KLINGON, WRAPPER, CG7166, and CG13506; WRK-1 is expressed in the pioneering embryonic motoneurons (eMNs) DA, DB, and DD; WRK-1 expression in DA, DB, and DD is necessary and sufficient to prevent follower axons from inappropriately crossing the ventr…
cel-let-7-5p	WBGene00003003	lin-14	739	-87.6	lin-14 encodes a novel protein whose activity is required for specifying the division timings of a specific group of cells during postembryonic development; lin-14 loss-of-function mutations result in the premature appearance of later larval lineages, while gain-of-function mutations result in reiteration of L1 larval stages lineages; in addition, lin-14 acts as a positive regulator of AVM, PVM, …
cel-let-7-5p	WBGene00012435	flh-1	158	-14.64	none available
cel-let-7-5p	WBGene00001595	gld-1	163	-20.61	gld-1 encodes a protein containing a K homology (KH) RNA binding domain; GLD-1 is required for regulation of the mitosis/meiosis decision during germline development (promotion of meiotic entry) in parallel with gld-2, gld-3, and nos-3 and also affects spermatogenesis; GLD-1 physically interacts with the 3"- and 5"UTR of its putative mRNA targets in vitro to negatively regulate their translation;…
cel-let-7-5p	WBGene00017814	F26A10.2	289	-32.1	F26A10.2 encodes a protein with four zinc-finger domains and a glutamine/asparagine-rich domain, that is required for maintenance of the germline and for locomotion; F26A10.2(RNAi) animals are uncoordinated and have sterile progeny.
cel-let-7-5p	WBGene00022447	hpo-20	163	-15.38	none available
cel-miR-80-3p	WBGene00011156	R09B3.3	161	-18.84	none available
cel-miR-80-3p	WBGene00000479	cgh-1	166	-21.24	cgh-1 encodes a putative DEAD-box RNA helicase, orthologous to budding yeast Dhh1p, fission yeast Ste13p, Drosophila ME31B, and human DDX6 (OMIM:600326); CGH-1 inhibits physiological apoptosis in oocytes, keeping it down to a normal level of ~50% in hermaphrodite gonads; independently of apoptosis, CGH-1 is also required for sperm function, oocyte fertilization, and early embryonic cytokinesis; b…
cel-miR-80-3p	WBGene00009141	ncbp-2	169	-21.56	ncbp-2 encodes the C. elegans ortholog of the CBP20 subunit of the nuclear cap binding complex; by homology, NCBP-2 is predicted to play a role in mRNA decay; loss of ncbp-2 activity via RNAi indicates that this gene is essential for embryonic and larval development and in addition, plays a role in reproduction and vulval morphogenesis; staining of C. elegans embryos with an antibody to human CBP…
cel-miR-80-3p	WBGene00022048	fln-1	164	-19.9	fln-1 encodes three protein isoforms, a full length filamin (fln-1a) orthologous to human filamin A, alpha (FLNA; OMIM:300017), of 2257 amino acids containing a well conserved N-terminal ABD and 20 Ig-like repeats and two trans-sliced versions with C- and N- terminal truncations are 1084 and 836 amino-acids respectively; expression of full-length filamin in hermaphrodites is required for normal b…
cel-miR-80-3p	WBGene00001038	dnj-20	293	-24.79	none available
cel-miR-80-3p	WBGene00004208	ptc-1	156	-14.67	ptc-1 encodes an ortholog of Drosophila PATCHED (PTC) and human PTCH which defines one of seven paralogous families of sterol sensing domain (SSD) proteins; PTC-1 is required for cytokinesis in the germline, but not in somatic cells (the converse of PTR-2"s function, and a role conserved in C. briggsae); PTC-1 is also required to isolate meiotic germline nuclei from one another so that their nucl…
cel-miR-80-3p	WBGene00006888	vbh-1	165	-15.06	vbh-1 encodes a DEAD-box RNA helicase with similarity to Drosophila Vasa and Belle; vbh-1 activity is required for the proper timing of the sperm-oocyte switch during germ line development; vbh-1 also plays a role in embryonic development; in regulating germ line development, vbh-1 appears to function at least partially redundantly with laf-1, which also encodes a DEAD-box RNA helicase; VBH-1 is …
cel-miR-80-3p	WBGene00003955	pcn-1	158	-15.5	pcn-1 encodes the C. elegans ortholog of proliferating cell nuclear antigen (PCNA), an acidic protein that is an essential component of the DNA replication and repair machinery and serves as a processivity factor for DNA polymerase delta; PCN-1 is required for early embryogenesis and for proper germ-line development, and directly interacts with CKI-2, a cyclin-dependent kinase inhibitor homolog t…
cel-miR-80-3p	WBGene00006391	taf-9	157	-13.18	none available
cel-miR-80-3p	WBGene00016115	mdt-26	159	-17.09	none available
cel-miR-80-3p	WBGene00012182	osta-3	320	-25.78	none available
cel-miR-80-3p	WBGene00002000	hrp-2	156	-21.01	none available
cel-miR-80-3p	WBGene00017814	F26A10.2	300	-32.8	F26A10.2 encodes a protein with four zinc-finger domains and a glutamine/asparagine-rich domain, that is required for maintenance of the germline and for locomotion; F26A10.2(RNAi) animals are uncoordinated and have sterile progeny.
cel-miR-80-3p	WBGene00006830	unc-103	169	-25.02	unc-103 encodes an ether-a-go-go-related (ERG) K+ channel homolog, orthologous to human KCNH6 (OMIM:608168); UNC-103 regulates muscle activation in motility, egg-laying and male spicule protraction; UNC-103 is expressed highly in many neurons; gain-of-function unc-103 alleles can be uncoordinated, while loss-of-function alleles have a more subtle defect in copulatory spicule protraction.
cel-miR-80-3p	WBGene00004751	sea-2	287	-25.79	sea-2 encodes a zinc finger protein; SEA-2 is an autosomal signal element (ASE) that functions to interpret the X:A chromosomal ratio; in addition, SEA-2 functions autonomously in the intestine to regulate adult lifespan and autonomously in seam cells to regulate larval developmental timing; in regulating lifespan and developmental timing, SEA-2 functions as a post-transcriptional negative regula…
cel-miR-80-3p	WBGene00007227	C01G6.5	159	-17.58	none available
cel-miR-80-3p	WBGene00001431	fkb-6	161	-19.02	fkb-6 encodes a peptidyl-prolyl cis-trans isomerase that is most closely related to mammalian FK506-binding protein 4; loss of fkb-6 activity via large-scale RNAi screens indicates that fkb-6 is required for embryonic and vulval development as well as wild type brood size; FKB-6 exhibits peptidyl-prolyl cis-trans isomerase activity in vitro, and physically interacts with the Hsp90 ortholog DAF-21…
cel-miR-80-3p	WBGene00012982	jmjd-2	159	-14.45	none available
cel-miR-250-3p	WBGene00022037	acs-13	156	-16.81	none available
cel-miR-250-3p	WBGene00001038	dnj-20	156	-17.5	none available
cel-miR-250-3p	WBGene00001262	emb-8	300	-25.48	emb-8 encodes the C. elegans NADPH-cytochrome P450 reductase ortholog; by homology, EMB-8 is predicted to function in the enzymatic reduction of the cytochrome P450 monooxygenase enzymes that play a role in fatty acid modification; during embryonic development, emb-8 activity is essential for normal interactions between the pronucleus/centrosome complex and the posterior cortex and thus, for prop…
cel-miR-250-3p	WBGene00001562	lin-66	283	-26.78	lin-66 encodes an unfamiliar protein, with visible homologs only in nematodes, that was identified in screens for molecules that interact with GEX-3, a homolog of mammalian protein ligands of the small GTPase Rac1, that is essential for ventral enclosure during embryonic development; LIN-66 is expressed in body wall and vulval muscles, and is also detected in the intestine, neurons, and probably …
cel-miR-250-3p	WBGene00022114	Y71F9AL.9	301	-30.77	none available
cel-miR-250-3p	WBGene00019351	lron-7	159	-15.22	none available
cel-miR-250-3p	WBGene00004755	sec-24.1	297	-27.95	sec-24.1 encodes one of two C. elegans Sec24 homologs; in Saccharomyces cerevisiae, Sec24 is a member of the Sec24-Sec23 subunit of the COPII coat complex, assembly of which is essential for the first step of secretory protein transport from the endoplasmic reticulum (ER) to the Golgi; by homology with Sec24, SEC-24.1 is predicted to facilitate vesicle cargo selection, and likely contains multipl…
cel-miR-250-3p	WBGene00015404	nstp-4	285	-21.91	nstp-4 encodes a transporter of UDP-N-acetylglucosamine (UDP-GlcNAc) and UDP-N-acetylgalactosamine (UDP-GalNAc), orthologous to human SLC35A3 (OMIM:605632); NSTP-4 is redundantly required, with its paralog SRF-3, for normal progression of oocytes through proximal gonads and for normal gonad morphology; nstp-4 is expressed in many tissues, including pharynx, intestine, pharyngeal gland cells, seam…
cel-miR-239a-5p	WBGene00010557	mspn-1	163	-19.73	none available
cel-miR-239a-5p	WBGene00001393	fat-1	156	-17.81	fat-1 encodes an omega-3 fatty acyl desaturase that acts on substrates of 16-20 carbons with a preference for omega-6 fatty acids; FAT-1 dehydrogenates its substrates 3 carbons from the methyl terminus; FAT-1 is required in vivo for n3 polyunsaturated fatty acid (PUFA) synthesis; the fatty acids of fat-1(wa9) mutants consist of 20% arachidonic acid (20:4n6), instead of the 20% eicosapentaenoic ac…
cel-miR-239b-5p	WBGene00010557	mspn-1	163	-15.91	none available
cel-miR-239b-5p	WBGene00003762	nlp-24	156	-12.69	none available
cel-miR-239b-5p	WBGene00001393	fat-1	156	-10.03	fat-1 encodes an omega-3 fatty acyl desaturase that acts on substrates of 16-20 carbons with a preference for omega-6 fatty acids; FAT-1 dehydrogenates its substrates 3 carbons from the methyl terminus; FAT-1 is required in vivo for n3 polyunsaturated fatty acid (PUFA) synthesis; the fatty acids of fat-1(wa9) mutants consist of 20% arachidonic acid (20:4n6), instead of the 20% eicosapentaenoic ac…
cel-miR-392-5p	WBGene00001595	gld-1	158	-17.32	gld-1 encodes a protein containing a K homology (KH) RNA binding domain; GLD-1 is required for regulation of the mitosis/meiosis decision during germline development (promotion of meiotic entry) in parallel with gld-2, gld-3, and nos-3 and also affects spermatogenesis; GLD-1 physically interacts with the 3"- and 5"UTR of its putative mRNA targets in vitro to negatively regulate their translation;…
cel-miR-392-5p	WBGene00044342	T05B11.7	163	-24.83	none available
cel-miR-392-5p	WBGene00003048	lit-1	162	-17.58	lit-1 encodes a serine threonine protein kinase homolog related to the Drosophila protein Nemo; lit-1 is required for embryonic viability and plays a central role in controlling the asymmetry of cell divisions during embryogenesis; lit-1 acts downstream of mom-2 with respect to polarity defects and mediates larval cell fate decisions that involve POP-1; lit-1 is also required for amphid channel m…
cel-miR-392-3p	WBGene00006536	tbb-1	163	-18.52	This gene encodes a homolog of mammalian beta-tubulin (TUBB) that is expressed at high levels in the germline; TBB-1 is redundant for embryonic viability, due to its paralog TBB-2.
cel-miR-392-3p	WBGene00000277	cab-1	281	-37.49	Novel protein which has a C-terminal motif weakly homologous to mouse NPDC-1 and is involved in synaptic regulation; it is expressed in various neurons including ventral cord and tail ganglion neurons; it physically interacts with AEX-3, which is a guanine nucleotide exchange factor for the Rab3 GTPase.
cel-miR-392-3p	WBGene00002363	let-92	162	-18.83	let-92 encodes a homolog of PP2AC, the catalytic subunit of protein phosphatase 2A (PP2A); let-92 was identified genetically in screens for essential genes on chromosome IV; LET-92 may regulate a number of signal transduction pathways as it is required for embryogenesis, larval development, Ras-mediated vulval development, and axonal guidance in the DD and VD neurons; let-92 interacts genetically…
cel-miR-270-5p	WBGene00000066	act-4	289	-37.92	act-4 encodes an actin isoform that is most similar to act-2 in amino acid sequence; an act-4 reporter gene is expressed in body wall and vulval muscles and the spermatheca.
cel-miR-270-5p	WBGene00001137	eat-6	156	-12.78	eat-6 encodes an ortholog of the alpha subunit of a sodium/potassium ATPase, which in turn affects Na+,K(+)-ATPase activity of membranes by affecting the level of the phosphorylated intermediate of the Na+,K(+)-ATPase; EAT-6 affects relaxation of the pharyngeal muscles, fertility (and thus affects feeding); EAT-6 also affects body length, life span, and ASE, ASI and ASJ axonal outgrowth.
cel-miR-270-5p	WBGene00016981	C56G2.7	161	-19.63	none available
cel-miR-270-5p	WBGene00016509	adss-1	158	-23.79	none available
cel-miR-270-5p	WBGene00019726	bris-1	156	-17.6	none available
cel-miR-4937-5p	WBGene00004336	ret-1	159	-22.91	none available
cel-miR-4937-5p	WBGene00001502	ftt-2	166	-26.05	ftt-2 encodes a 14-3-3 protein; FTT-2 is required for regulating the localization of the product of YAP-1, a Yes-associated protein (Yap) homolog, between the cytoplasm and the nucleus.
cel-miR-4937-5p	WBGene00003559	ncl-1	294	-42.51	ncl-1 encodes a cytoplasmic B-box zinc finger protein that negatively regulates rRNA and 5S RNA transcription, nucleolus size, and body size; NCL-1 is orthologous to Drosophila BRAIN TUMOR (BRAT), and ncl-1 mutants can be rescued by brat transgenes; NCL-1 is required for the normally small size of neuronal, muscle, and hypodermal nucleoli, and is already active in 4-cell embryos; NCL-1 may be a r…
cel-miR-4937-5p	WBGene00007696	tram-1	290	-52.71	tram-1 encodes the C. elegans ortholog of translocating chain-associated membrane protein 1; by homology, TRAM-1 is predicted to function in translocation of protein across the endoplasmic reticulum membrane; TRAM-1 localizes to the rough endoplasmic reticulum (ER) as well as to post-ER compartments such as the ciliary base.
cel-miR-4937-5p	WBGene00007058	dmd-6	289	-48	none available
cel-miR-4937-5p	WBGene00000793	crh-1	162	-22.74	crh-1 encodes a homolog of the cyclic AMP-response element binding protein (CREB); crh-1 is involved in the transcription of CRE-sequence dependant genes activated by a CaM kinase cascade; crh-1 is required in the bilateral thermosensory neuron AFD, for a memory-related behaviour and for response to tap (nonlocalized mechanosensory stimulation) and tap habituation; crh-1 appears to be ubiquitousl…
cel-miR-4937-5p	WBGene00022286	rga-4	281	-45.47	rga-4 encodes a GTPase-activating protein (GAP); RNAi experiments predicted to target rga-4 and the related rga-3 gene result in early embryonic defects, specifically defects in cortical contractility, non-muscle myosin NMY-2 distribution, and the relative size of PAR protein domains; in vitro, RGA-4 positively regulates RHO-1 GTPase activity, consistent with genetic studies showing that the rga-…
cel-miR-4937-5p	WBGene00003144	max-2	437	-82.02	max-2 encodes, by alternative splicing, at least two isoforms of a putative p21-activated kinase that is required (redundantly with its paralog, PAK-1) for normal axonal guidance of motoneurons, P cell migration, and locomotion, with max-2(cy2);pak-1(ok448) double mutants phenotypically resembling unc-73 or ced-10;mig-2 mutants; max-2 is expressed ubiquitously in early embryos, then localizes to …
cel-miR-4937-5p	WBGene00002190	kin-2	163	-32.38	kin-2 encodes a predicted regulatory subunit of a cAMP-dependent protein kinase that may act downstream of, or in parallel to, ric-8.
cel-miR-4937-5p	WBGene00001595	gld-1	296	-40.71	gld-1 encodes a protein containing a K homology (KH) RNA binding domain; GLD-1 is required for regulation of the mitosis/meiosis decision during germline development (promotion of meiotic entry) in parallel with gld-2, gld-3, and nos-3 and also affects spermatogenesis; GLD-1 physically interacts with the 3"- and 5"UTR of its putative mRNA targets in vitro to negatively regulate their translation;…
cel-miR-4937-5p	WBGene00020507	vha-15	290	-47.08	vha-15 encodes an ortholog of subunit H of the cytoplasmic (V1) domain of vacuolar proton-translocating ATPase (V-ATPase); VHA-15 and VHA-18 are co-orthologs; VHA-15, along with VHA-2 and probably all V-ATPase subunits, is required for systemic RNAi, probably during endocytotic RNAi uptake; VHA-15 is a predicted cytosolic stator (stalk) component; neurons).
cel-miR-4937-5p	WBGene00009082	dlat-1	167	-30.12	F23B12.5 is orthologous to the human gene DIHYDROLIPOAMIDE DEHYDROGENASE (DLD; OMIM:109720), which when mutated leads to lactic acidosis due to lipoamide dehydrogenase deficiency.
cel-miR-4937-5p	WBGene00012988	ztf-22	156	-20.93	none available
cel-miR-793-5p	WBGene00000912	daf-16	159	-11.37	daf-16 encodes the sole C. elegans forkhead box O (FOXO) homologue; DAF-16 functions as a transcription factor that acts in the insulin/IGF-1-mediated signaling (IIS) pathway that regulates dauer formation, longevity, fat metabolism, stress response, and innate immunity; DAF-16 regulates these various processes through isoform-specific expression, isoform-specific regulation by different AKT kina…
cel-miR-793-5p	WBGene00016250	hsp-110	159	-11.13	C30C11.4 encodes a member of the Hsp70 family of heat shock proteins; loss of C30C11.4 activity via large-scale RNAi screens results in a variety of defects including embryonic and larval lethality, slow growth rates, and locomotory and morphological defects; in addition loss of C30C11.4 has been reported to result in a small but reproducible reduction in adult lifespan in otherwise long-lived an…
cel-miR-793-5p	WBGene00001320	ent-1	160	-13.12	ent-1 encodes a predicted equilibrative nucleoside transporter 1 that affects growth.
cel-miR-793-5p	WBGene00004804	skn-1	156	-12.83	skn-1 encodes a bZip transcription factor orthologous to the mammalian Nrf (Nuclear factor-erythroid-related factor) transcription factors; during early embryogenesis, maternally provided SKN-1 is required for specification of the EMS blastomere, a mesendodermal precursor that gives rise to pharyngeal, muscle, and intestinal cells; later, during postembryonic development, SKN-1 functions in the p…
cel-miR-793-5p	WBGene00003618	nhr-19	159	-14.5	none available
cel-miR-799-5p	WBGene00003964	pdi-3	156	-17.57	pdi-3 encodes a protein disulfide isomerase (PDI) required for normal cuticle collagen deposition and, subliminally, for maintenance of normal body shape; PDI-3 has both PDI and calcium-dependent transglutaminase activity in vitro, crosslinking proteins through a gamma-glutamyl epsilon-lysine dual residue; PDI-3 is homologous to the human PDI ERp60, as well as a homolog in the dog heartworm Dirof…

## Sheet: miRanda prediction ALL
miRNA	WBGene target	Name	Pairing Score	Energy Score	Description
cel-miR-241-5p	WBGene00000225	atgp-2	144	-17.27	atgp-2 encodes an amino acid transporter glycoprotein subunit; when co-expressed in Xenopus oocytes with either the AAT-1 or AAT-3 catalytic subunit, ATGP-2 facilitates amino acid uptake and exchange, showing a relatively high affinity for small and some large neutral amino acids; when co-expressed with AAT-9, ATGP-2 is able to enhance the activity of this catalytic subunit; ATGP-2 can covalently…
cel-miR-241-5p	WBGene00006930	vit-6	140	-11.9	vit-6 encodes a vitellogenin precursor protein that is cleaved in the body cavity into two smaller yolk proteins, YP115 and YP88; in C. elegans, vitellogenin genes exhibit stage-, sex-, and tissue-specific expression being expressed exclusively in the adult hermaphrodite intestine.
cel-miR-241-5p	WBGene00002280	let-2	140	-17.94	let-2 encodes an alpha-2 type IV collagen, probably most closely equivalent to the human gene COL4A2 (OMIM:120090) on the basis of biological function; LET-2 is required for embryonic development and is a component of the basement membrane between muscle and hypodermis; LET-2 interacts with UNC-105, a mechanosensory ion channel of the degenerin ion channel superfamily that is expressed in muscle …
cel-miR-241-5p	WBGene00013311	sec-61	144	-15.12	none available
cel-miR-241-5p	WBGene00015248	mai-2	143	-16.36	mai-2/B0546.1 is orthologous to mitochondrial intrinsic ATPase inhibitor protein (IF(1)), which blocks reverse action (ATP hydrolysis) by F(0)F(1)-ATPase when its (normally required) proton gradient is lost; MAI-2 has a mitochondrial import signal at its N-terminus, and is transported to yeast mitochondria; MAI-2 can inhibit yeast F(0)F(1)-ATPase, and this inhibition is pH-dependent; MAI-2"s tert…
cel-miR-241-5p	WBGene00011304	mnk-1	288	-37.69	mnk-1 encodes the C. elegans ortholog of the Mnk MAP kinase-interacting kinase
cel-miR-241-5p	WBGene00006784	unc-49	147	-19.02	unc-49 encodes multiple subunits of a heteromeric GABA receptor; unc-49 activity is required for postsynaptic GABA responsiveness and thus for normal regulation of locomotion; UNC-49::GFP reporter fusions for at least two isoforms are expressed in dorsal and ventral head and body wall muscles, with isoform-specific expression also seen in the sphincter muscle; UNC-49::GFP subcellular localization…
cel-miR-241-5p	WBGene00010244	F58D5.5	149	-19.15	none available
cel-miR-241-5p	WBGene00021952	vha-19	142	-16.01	vha-19 encodes an ortholog of subunit Ac45 of the membrane-bound (V0) domain of vacuolar proton-translocating ATPase (V-ATPase); VHA-19 is a predicted V-ATPase transmembrane rotor component; Ac45 is a nonhomologous replacement for subunit c", which is found in fungi but not in animals; conversely, orthologs of Ac45 are only found in animals; VHA-19 is predicted to help carry protons from the cyto…
cel-miR-241-5p	WBGene00022235	sqd-1	141	-16.84	none available
cel-miR-241-5p	WBGene00019510	K07H8.10	147	-20.39	none available
cel-miR-241-5p	WBGene00000912	daf-16	445	-44.08	daf-16 encodes the sole C. elegans forkhead box O (FOXO) homologue; DAF-16 functions as a transcription factor that acts in the insulin/IGF-1-mediated signaling (IIS) pathway that regulates dauer formation, longevity, fat metabolism, stress response, and innate immunity; DAF-16 regulates these various processes through isoform-specific expression, isoform-specific regulation by different AKT kina…
cel-miR-241-5p	WBGene00007646	nkb-1	292	-41.89	none available
cel-miR-241-5p	WBGene00021597	spsb-1	142	-20.22	none available
cel-miR-241-5p	WBGene00010681	mak-1	150	-18.51	none available
cel-miR-241-5p	WBGene00003567	ncx-2	146	-14.89	ncx-2 encodes, by alternative splicing, three full-length isoforms of a putative 3Na[+]/1Ca[2+] exchanger, orthologous to human SLC8A1-3 and paralogous to NCX-1 and NCX-3; NCX-2 is predicted to export free cytoplasmic Ca[2+] with low affinity but high capacity, being complemented by low-capacity/high-affinity Ca[2+] ATPase pumps such as MCA-1/-3; NCX-3 has tandem Calx-alpha and Calx-beta domains …
cel-miR-241-5p	WBGene00009772	ztf-7	154	-16.21	none available
cel-miR-241-5p	WBGene00006942	wrk-1	143	-14.51	wrk-1 encodes, by alternative splicing, at least three isoforms of a GPI-anchored immunoglobulin superfamily (IgSF) protein orthologous to Drosophila KLINGON, WRAPPER, CG7166, and CG13506; WRK-1 is expressed in the pioneering embryonic motoneurons (eMNs) DA, DB, and DD; WRK-1 expression in DA, DB, and DD is necessary and sufficient to prevent follower axons from inappropriately crossing the ventr…
cel-miR-241-5p	WBGene00016422	noah-1	140	-13.82	noah-1 encodes a PAN and ZP domain-containing protein that is related to the Drosophila extracellular matrix component NompA (no-mechanoreceptor-potential A); loss of noah-1 function via RNAi indicates that NOAH-1 activity is essential for molting; in addition, NOAH-1 appears to be required for embryonic and larval development, vulval development, coordinated locomotion, and normal body morpholog…
cel-miR-241-5p	WBGene00003687	nhr-97	141	-13.74	none available
cel-miR-241-5p	WBGene00006331	sup-26	141	-14.69	sup-26 encodes an RRM domain-containing protein; SUP-26 functions in somatic sex determination via negative regulation of tra-2 translation; SUP-26 binds the tra-2 28-nucleotide repeat element known as the TRA-2/GLI element (TGE), which is located in tra-2 3";untranslated region (UTR); SUP-26 physically interacts with the poly(A)-binding protein PAB-1, suggesting that it may control tra-2 transla…
cel-miR-241-5p	WBGene00006888	vbh-1	140	-21.85	vbh-1 encodes a DEAD-box RNA helicase with similarity to Drosophila Vasa and Belle; vbh-1 activity is required for the proper timing of the sperm-oocyte switch during germ line development; vbh-1 also plays a role in embryonic development; in regulating germ line development, vbh-1 appears to function at least partially redundantly with laf-1, which also encodes a DEAD-box RNA helicase; VBH-1 is …
cel-miR-241-5p	WBGene00015776	dct-1	142	-21.71	dct-1 encodes a protein with similarity to the mammalian BNIP3 proteins that interact with Bcl-2 and the Adenovirus E1B 19kDa protein and that have been shown to have pro-apoptotic activity; loss of dct-1 activity via RNAi in daf-2 mutants and in gld-1; daf-2 doubly mutant animals indicates that dct-1 can function to regulate both lifespan and tumor cell proliferation; when expressed in mammalian…
cel-miR-241-5p	WBGene00002783	let-607	142	-19.42	let-607 encodes an ortholog of the Cyclic AMP-responsive Element-Binding (CREB) family of transcription factors.
cel-miR-241-5p	WBGene00003003	lin-14	748	-104.42	lin-14 encodes a novel protein whose activity is required for specifying the division timings of a specific group of cells during postembryonic development; lin-14 loss-of-function mutations result in the premature appearance of later larval lineages, while gain-of-function mutations result in reiteration of L1 larval stages lineages; in addition, lin-14 acts as a positive regulator of AVM, PVM, …
cel-miR-241-5p	WBGene00016115	mdt-26	150	-18.51	none available
cel-miR-241-5p	WBGene00012435	flh-1	308	-44.12	none available
cel-miR-241-5p	WBGene00006751	unc-11	147	-16.51	unc-11 encodes multiple isoforms of a clathrin-adaptor protein AP180 (OMIM:603025) that functions in clathrin-mediated endocytosis; UNC-11 is essential for embryogenesis, locomotion, and pharyngeal pumping, and regulates neurotransmitter release by controlling vesicle trafficking and fusion; UNC-11 is also required for localization of SNB-1/synaptobrevin to synaptic vesicles, thus acting as a sor…
cel-miR-241-5p	WBGene00007135	cdk-12	143	-21.18	none available
cel-miR-241-5p	WBGene00008973	F20D1.1	148	-15.13	none available
cel-miR-241-5p	WBGene00003826	ntl-3	157	-24.07	ntl-3 is the ortholog of NOT3/NOT5, a member of a protein complex also predicted to contain ccf-1/Y56A3A.20 (CAF1/POP2); ntl-3 is required for embryonic viability in mass RNAi assays.
cel-miR-241-5p	WBGene00001595	gld-1	145	-15.81	gld-1 encodes a protein containing a K homology (KH) RNA binding domain; GLD-1 is required for regulation of the mitosis/meiosis decision during germline development (promotion of meiotic entry) in parallel with gld-2, gld-3, and nos-3 and also affects spermatogenesis; GLD-1 physically interacts with the 3"- and 5"UTR of its putative mRNA targets in vitro to negatively regulate their translation;…
cel-miR-241-5p	WBGene00004984	spn-4	150	-21.98	spn-4 encodes a protein containing an RNP-type RNA-binding domain; SPN-4 is required for rotation, but not polarization, of the mitotic spindle in the P1 blastomere of the two-cell stage embryo; SPN-4 is also required for mesectoderm and mesendoderm formation in conjunction with proper localization of maternal cell-fate determinants such as SKN-1; in addition, SPN-4 binds the glp-1 3" UTR and is …
cel-miR-241-5p	WBGene00001457	flp-14	149	-17.99	flp-14 encodes four copies of a single FMRFamide-related short peptide neurotransmitter; FLP-14 can increase pharyngeal action potential frequency, although its exact role in C. elegans neurotransmission is not yet clear.
cel-miR-241-5p	WBGene00017814	F26A10.2	143	-20.14	F26A10.2 encodes a protein with four zinc-finger domains and a glutamine/asparagine-rich domain, that is required for maintenance of the germline and for locomotion; F26A10.2(RNAi) animals are uncoordinated and have sterile progeny.
cel-miR-241-5p	WBGene00016162	crh-2	144	-18.27	none available
cel-miR-241-5p	WBGene00018285	smk-1	162	-19.69	smk-1 encodes a novel, evolutionarily conserved protein that is orthologous to the mammalian and Dictyostelium discoideum SMEK (suppressor of MEK null) proteins; smk-1 activity is essential for several aspects of DAF-16-mediated longevity namely, the defense response to pathogenic bacteria and increased resistance to oxidative and UV-induced damage; in regulating DAF-16 activity, SMK-1 appears to…
cel-miR-241-5p	WBGene00002889	let-765	145	-21.15	none available
cel-miR-241-5p	WBGene00000496	chs-1	151	-20.52	chs-1 encodes a chitin synthase, paralogous to CHS-2; chs-1 is required for embryonic chitin synthesis, eggshell synthesis and osmotic integrity, error-free chromosomal segregation during meiosis, polar body extrusion, association of the sperm pronucleus/centrosome complex (SPCC) with the early embryonic cortex, localization of PAR-2 in early embryos, posterior localization of P granules or PIE-1…
cel-miR-241-5p	WBGene00021009	afd-1	146	-19.49	none available
cel-miR-241-5p	WBGene00001999	hrp-1	142	-18.35	hrp-1 encodes a putative heterogeneous nuclear ribonucleoprotein (hnRNP) required for mRNA surveillance, normally rapid growth, normally short lifespan, normally short body length, vulval development, DAF-18 function, fertility, and general viability; HRP-1 has two N-terminal RRM domains and a low-complexity C-terminal domain; HRP-1"s homologs include HNRNPA0 (OMIM:609409), HNRNPA1 (HNRPA1; OMIM:…
cel-miR-241-5p	WBGene00016611	bicd-1	145	-23.58	bicd-1 encodes the C. elegans homolog of Drosophila BicaudalD, a dynein regulator; in C. elegans, bicd-1 is an essential gene and is also required for hyp7 nuclear migrations; BICD-1 physically interacts with UNC-83 and EGAL-1, and thus likely functions as part of a dynein regulatory complex (that also includes DLC-1) that controls the directionality and extent of nuclear migrations; a bicd-1::GF…
cel-miR-241-5p	WBGene00002203	kin-20	143	-16.15	none available
cel-miR-241-5p	WBGene00008121	C46F11.6	157	-19.15	none available
cel-miR-241-5p	WBGene00010700	nipi-3	144	-15.93	nipi-3 encodes a kinase similar to the human kinase Tribbles homolog 1; nipi-3 functions in the innate immune response, likely upstream of the SEK-1 MAPKK, to upregulate expression of NLP-29, an antimicrobial peptide, in response to fungal infection.
cel-miR-241-5p	WBGene00003404	mpz-1	149	-18.37	mpz-1 encodes a multi-PDZ domain scaffold protein; mpz-1(RNAi) animals have reduced serotonin (5-HT)-stimulated egg laying unless truncated SER-1 is transgenically expressed in vulval muscle; overexpressed MPZ-1 PDZ domain 10 also reduces SER-1-mediated egg laying; the PDZ domain 10 of MPZ-1 binds the C-terminal PDZ-binding motif (ETFL) of the 5-HT receptor SER-1; MPZ-1 also physically interacts …
cel-miR-241-5p	WBGene00022447	hpo-20	146	-15.76	none available
cel-miR-241-5p	WBGene00010221	F57G12.1	145	-15.98	none available
cel-miR-241-5p	WBGene00019883	met-2	143	-21.7	met-2 encodes a histone methyltransferase similar to human SETDB1; during development, met-2 acts as a class B synMuv gene: loss of met-2 activity in the background of a class A or class C synMuv mutant, such as lin-15A or trr-1, respectively, results in a multivulval phenotype, indicating that met-2 acts to negatively regulate vulval cell fate specification; as met-2 is required for normal level…
cel-miR-241-5p	WBGene00004739	scd-1	292	-35.75	scd-1 encodes a novel protein with several regions that are extremely glutamine (Q) rich, interspersed with other residues (usually alanine); SCD-1 affects signalling by proteins in the DAF-7/transforming growth factor (TGF)-beta pathway (DAF-1, DAF-8, and DAF-14), and the Q-rich regions of SCD-1 protein may mediate epigenetic changes of stably heritable tertiary conformation.
cel-miR-241-5p	WBGene00006342	sup-37	148	-21.32	none available
cel-miR-241-5p	WBGene00015301	C01F1.6	151	-18.77	none available
cel-miR-241-5p	WBGene00002979	lfe-2	148	-14.71	lfe-2 encodes an inositol (1,4,5) triphosphate-3-kinase (IP3K); lfe-2 activity is required for normal levels of hermaphrodite fertility and for tissue-specific negative regulation of the LET-23 signaling pathway that controls spermathecal dilation and ovulation; in vitro, LFE-2 can exhibit catalytic activity, converting IP3 to IP4; an lfe-2::GFP transcriptional fusion is expressed in the adult sp…
cel-miR-241-5p	WBGene00003052	lmn-1	149	-22.36	lmn-1 encodes the sole C. elegans nuclear lamin; lmn-1 is an essential gene that is required for a number of nuclear processes, including chromatin organization, cell cycle progression, chromosome segregation, and nuclear pore complex spacing; LMN-1 is also required for nuclear envelope localization of EMR-1/Emerin during early development; LMN-1 localizes to the nuclear periphery of all cell typ…
cel-miR-241-5p	WBGene00009717	dep-1	148	-20.07	dep-1 encodes a class III receptor protein tyrosine phosphatase (R-PTP) orthologous to human R-PTPs such as PTPRJ/Dep-1 (mutated in epithelial cancers; OMIM:600925); DEP-1 is required, redundantly with LIP-1 and LET-60, and downstream of LIN-12, to promote secondary over primary vulval fate in the P5.p and P7.p lineages; DEP-1 is expressed in P5.p and P7.p lineages, and dep-1 acts cell-autonomous…
cel-miR-241-5p	WBGene00017699	flcn-1	151	-18.59	F22D3.2 encodes an ortholog of human folliculin (OMIM:607273, mutated in Birt-Hogg-Dube syndrome).
cel-miR-241-5p	WBGene00004187	prp-8	151	-23.22	prp-8 is orthologous to the human gene SIMILAR TO U5 SNRNP-SPECIFIC PROTEIN (220 KD), ORTHOLOG OF S.
cel-miR-230-3p	WBGene00003148	mbf-1	145	-6.76	none available
cel-miR-230-3p	WBGene00010557	mspn-1	151	-7.88	none available
cel-miR-230-3p	WBGene00000219	asp-6	155	-13.79	aspartic protease.
cel-miR-230-3p	WBGene00001137	eat-6	155	-12.93	eat-6 encodes an ortholog of the alpha subunit of a sodium/potassium ATPase, which in turn affects Na+,K(+)-ATPase activity of membranes by affecting the level of the phosphorylated intermediate of the Na+,K(+)-ATPase; EAT-6 affects relaxation of the pharyngeal muscles, fertility (and thus affects feeding); EAT-6 also affects body length, life span, and ASE, ASI and ASJ axonal outgrowth.
cel-miR-230-3p	WBGene00020230	nep-2	157	-16.35	T05A8.4 encodes a neprilysin; neprilysins are thermolysin-like zinc metallopeptidases, found on the outer surface of animal cells, that negatively regulate small signalling peptides (e.g., enkephalin, tachykinin, insulin, and natriuretic peptides) by cleaving them; while T05A8.4 is an ortholog of mammalian neutral endopeptidase (NEP), expressed on the brush-border membranes of kidney; more genera…
cel-miR-230-3p	WBGene00011304	mnk-1	146	-16.43	mnk-1 encodes the C. elegans ortholog of the Mnk MAP kinase-interacting kinase
cel-miR-230-3p	WBGene00011869	dod-6	151	-10.33	none available
cel-miR-230-3p	WBGene00003375	mlp-1	146	-11.62	mlp-1 encodes a LIM domain-containing protein that is a member of the MLP/CRP family of muscle LIM domain proteins.
cel-miR-230-3p	WBGene00009141	ncbp-2	161	-14.67	ncbp-2 encodes the C. elegans ortholog of the CBP20 subunit of the nuclear cap binding complex; by homology, NCBP-2 is predicted to play a role in mRNA decay; loss of ncbp-2 activity via RNAi indicates that this gene is essential for embryonic and larval development and in addition, plays a role in reproduction and vulval morphogenesis; staining of C. elegans embryos with an antibody to human CBP…
cel-miR-230-3p	WBGene00021952	vha-19	140	-8.78	vha-19 encodes an ortholog of subunit Ac45 of the membrane-bound (V0) domain of vacuolar proton-translocating ATPase (V-ATPase); VHA-19 is a predicted V-ATPase transmembrane rotor component; Ac45 is a nonhomologous replacement for subunit c", which is found in fungi but not in animals; conversely, orthologs of Ac45 are only found in animals; VHA-19 is predicted to help carry protons from the cyto…
cel-miR-230-3p	WBGene00008205	sams-1	145	-19.18	sams-1 encodes an S-adenosyl methionine synthetase; by homology, SAMS-1 is predicted to function as a methyl-group donor in many biochemical reactions; sams-1 expression levels are negatively regulated by dietary restriction (as seen in eat-2 mutant animals), suggesting that increased lifespan due to dietary restriction is due, in part, to reducing the activity of key metabolic enzymes; loss of s…
cel-miR-230-3p	WBGene00020114	pde-4	153	-13.17	pde-4 encodes a cAMP phosphodiesterase orthologous to Drosophila dunce and the mammalian PDE4 family of phosphodiesterases; genetic analysis indicates that pde-4 activity is required for negative regulation of cAMP pools in the synaptic signaling network that controls locomotory rates and for regulation of sleep-like behavior (lethargus) during larval development; antibody staining of adult anima…
cel-miR-230-3p	WBGene00007709	clec-87	141	-14	clec-87 encodes a C-type lectin, paralogous to CLEC-88, C25B8.4, F26D10.12, and ZK858.3; CLEC-87 has a single chondroitin attachment site verified by mass spectrometry; clec-87 expression is upregulated in response to pathogen infection.
cel-miR-230-3p	WBGene00006519	tag-174	140	-20.15	none available
cel-miR-230-3p	WBGene00016913	lam-2	317	-32.84	lam-2 encodes a laminin gamma subunit; lam-2 activity is required for embryonic development and for regulation of muscle arm extension; loss of lam-2 function via large-scale RNAi screens results in embryonic, larval, and adult lethality, sterility, body morphology defects, and abnormal locomotion.
cel-miR-230-3p	WBGene00009920	abts-1	144	-11.38	abts-1 encodes a sodium-driven chloride-bicarbonate transporter; when expressed in Xenopus oocytes, ABTS-1 exhibits robust chloride transport, as well as chloride/bicarbonate exchange activity; abts-1 responds to arsenite in the environment with an increase in mRNA levels and is required for protection against toxicity of arsenite; abts-1 is involved in cholinergic signaling as abts-1 mutant worm…
cel-miR-230-3p	WBGene00010993	vha-20	140	-10.92	none available
cel-miR-230-3p	WBGene00010579	K05C4.2	141	-14.86	none available
cel-miR-230-3p	WBGene00000113	alh-7	143	-15.46	alh-7 encodes an ortholog of the human gene DJ73M23.2 (NAD+-DEPENDENT SUCCINIC SEMIALDEHYDE DEHYDROGENASE; ALDH5A1), which when mutated leads to SSADH deficiency (OMIM:271980).
cel-miR-230-3p	WBGene00016115	mdt-26	140	-11.38	none available
cel-miR-230-3p	WBGene00004384	rnp-1	145	-8.69	none available
cel-miR-230-3p	WBGene00013164	Y53F4B.18	143	-16.5	none available
cel-miR-230-3p	WBGene00001747	gsp-1	140	-16.72	none available
cel-miR-230-3p	WBGene00012435	flh-1	146	-11.56	none available
cel-miR-230-3p	WBGene00002190	kin-2	142	-10.12	kin-2 encodes a predicted regulatory subunit of a cAMP-dependent protein kinase that may act downstream of, or in parallel to, ric-8.
cel-miR-230-3p	WBGene00006751	unc-11	140	-12.76	unc-11 encodes multiple isoforms of a clathrin-adaptor protein AP180 (OMIM:603025) that functions in clathrin-mediated endocytosis; UNC-11 is essential for embryogenesis, locomotion, and pharyngeal pumping, and regulates neurotransmitter release by controlling vesicle trafficking and fusion; UNC-11 is also required for localization of SNB-1/synaptobrevin to synaptic vesicles, thus acting as a sor…
cel-miR-230-3p	WBGene00009532	ccch-1	307	-26.66	ccch-1 encodes a CCCH tandem zinc finger (TZF) protein; based upon its sequence similarity to human tristetraprolin and ERF-2 the product of F38B7.1 is predicted to function as an RNA-binding protein that specifically binds to UAUU repeats.
cel-miR-230-3p	WBGene00010701	ent-2	140	-13.42	none available
cel-miR-230-3p	WBGene00019628	pup-2	164	-18.36	pup-2 encodes a template-independent poly(U) polymerase with 3"" end RNA substrates, orthologous to human ZCCHC6 and ZCCHC11, and paralogous to CID-1; like its paralog CID-1, PUP-2 is required for normally rapid growth and normally short lifespan; pup-2(RNAi) animals are slow-growing and abnormally long-lived; PUP-2 is paralogous to the GLD-2 family of poly(A) polymerases.
cel-miR-230-3p	WBGene00001595	gld-1	140	-12.72	gld-1 encodes a protein containing a K homology (KH) RNA binding domain; GLD-1 is required for regulation of the mitosis/meiosis decision during germline development (promotion of meiotic entry) in parallel with gld-2, gld-3, and nos-3 and also affects spermatogenesis; GLD-1 physically interacts with the 3"- and 5"UTR of its putative mRNA targets in vitro to negatively regulate their translation;…
cel-miR-230-3p	WBGene00000283	cah-5	142	-12.25	cah-5 encodes a member of the carbonic anhydrase family.
cel-miR-230-3p	WBGene00006805	unc-73	160	-14.5	unc-73 encodes a guanine nucleotide exchange factor (GNEF) similar to the Trio protein; UNC-73 is required for vulval morphogenesis, for the migration of QL, QR, CAN, and hypodermal P cells, the commissure outgrowth of D type motoneurons, and amphid axon outgrowth; UNC-73 has GNEF activity for both CED-10 and MIG-2 in vitro; the requirement for UNC-73 in P cell migration can be suppressed by tran…
cel-miR-230-3p	WBGene00044342	T05B11.7	147	-15.18	none available
cel-miR-230-3p	WBGene00007016	mdt-15	144	-13.76	mdt-15 encodes, by alternative splicing, two isoforms of a Mediator subunit orthologous to human MED15 (OMIM:607372, deleted in DiGeorge syndrome); together with NHR-49 and SBP-1, MDT-15 is required for normal fat accumulation, for expression of fatty acid (FA) desaturase genes (fat-5, fat-6, and fat-7), for normal levels of mono- and polyunsaturated FAs (PUFAs), and for viability, fecundity, mob…
cel-miR-230-3p	WBGene00008448	E01G4.6	143	-10.43	none available
cel-miR-230-3p	WBGene00017921	F29B9.5	143	-9.7	none available
cel-miR-230-3p	WBGene00014115	gld-4	151	-17.2	gld-4 encodes a noncanonical poly(A) polymerase orthologous to Saccharomyces cerevisiae Trf4/5p; GLD-4 activity is required for early meiotic progression of male and female gametes in the absence of GLD-2 and for regulation of gld-1 mRNA levels; GLD-4 physically interacts with GLS-1 which stimulates GLD-4 poly(A) polymerase activity in vivo; GLD-4 is expressed predominantly in germ cells and loca…
cel-miR-230-3p	WBGene00006366	sym-1	153	-14.24	sym-1 encodes a protein containing 15 contiguous leucine-rich repeats (LRRs) that functionally overlaps with sym-5 and interacts with mec-8 with respect to embryonic viability and attachment of body muscle to the extracellular cuticle; expression begins at the time of embryonic elongation and SYM-1 is secreted from the apical hypodermal surface of the embryo; microarray analyses indicate that sym…
cel-miR-230-3p	WBGene00044698	K09F5.6	286	-21.23	none available
cel-miR-230-3p	WBGene00006741	unc-1	140	-10.5	unc-1 encodes one of ten C. elegans stomatin-like proteins (SLPs) homologous to human erythrocyte surface protein band 7.2 (EPB72/Stomatin) (OMIM:133090; deficient in stomatocytosis); UNC-1 activity regulates electrical coupling between body wall muscles and is required in neurons for normal locomotion; unc-1 is also required for anesthetic sensitivity; an unc-1 promoter::DsRED2 fusion is express…
cel-miR-230-3p	WBGene00011528	T06D8.7	140	-11.08	none available
cel-miR-230-3p	WBGene00010935	M163.1	152	-17.81	none available
cel-miR-230-3p	WBGene00006801	unc-68	145	-15.55	unc-68 encodes a ryanodine receptor ortholog that is expressed in body-wall muscle cells and is required for normal body tension and locomotion; unc-68 mutants are flaccid, sluggish, and resistant to ryanodine, but have normal muscle ultrastructure; UNC-68 is dispensable for excitation-contraction coupling itself, but may amplify its calcium signals; the unc-68/kra-1(kh30) mutation is an S1444N s…
cel-miR-230-3p	WBGene00000228	atn-1	152	-11.64	atn-1 encodes an alpha-actinin homolog.
cel-miR-230-3p	WBGene00004767	sel-10	155	-14.98	sel-10 encodes two isoforms of an F-box and WD-repeat-containing protein that is a component of an E3 ubiquitin ligase; SEL-10 functions as a negative regulator of the LIN-12/Notch-like signaling pathway in C. elegans and thus may contribute to cell fate decisions mediated by LIN-12; SEL-10 physically interacts with LIN-12 and with SEL-12, a C. elegans presenilin, and as such, is proposed to regu…
cel-miR-230-3p	WBGene00022776	perm-3	143	-14	none available
cel-miR-230-3p	WBGene00003990	pfn-2	145	-14.52	none available
cel-miR-230-3p	WBGene00001679	gpb-1	140	-13.99	gpb-1 encodes a heterotrimeric G protein beta subunit that is required during embryonic development for the proper orientation of the mitotic spindle during early cell divisions and thus affects the orientation of early cell division axes, and is also required for larval viability, negatively regulates locomotion and egg-laying, and may affect germline development and osmotic balance; expressed i…
cel-miR-230-3p	WBGene00002267	lec-4	140	-11.41	lec-4 encodes a predicted galectin that exhibits sugar binding properties in vitro.
cel-miR-230-3p	WBGene00004755	sec-24.1	142	-11.04	sec-24.1 encodes one of two C. elegans Sec24 homologs; in Saccharomyces cerevisiae, Sec24 is a member of the Sec24-Sec23 subunit of the COPII coat complex, assembly of which is essential for the first step of secretory protein transport from the endoplasmic reticulum (ER) to the Golgi; by homology with Sec24, SEC-24.1 is predicted to facilitate vesicle cargo selection, and likely contains multipl…
cel-miR-230-3p	WBGene00010059	F54E4.3	145	-7.9	none available
cel-miR-230-3p	WBGene00012735	sptf-3	140	-17.07	sptf-3 encodes a C2H2 zinc finger domain-containing protein that is a member of the Sp1 family of transcription factors; SPTF-3 activity is required for caspase-dependent and -independent apoptotic cell death of the sisters of two cells: the M4 pharyngeal motor neuron and the AQR sensory neuron; in addition, SPTF-3 plays a role in cell fate specification, embryonic and larval development, and mor…
cel-miR-230-3p	WBGene00001187	egl-19	144	-11.96	egl-19 encodes the pore-forming alpha1 subunit of a voltage-gated calcium channel orthologous to the alpha subunit of mammalian L-type calcium ion channels; EGL-19 carries L-type currents in pharyngeal and body wall muscle, and its activity is essential and required for muscle contraction during late embryonic morphogenesis, locomotion, egg laying, mating and feeding; recordings of voltage-depend…
cel-miR-230-3p	WBGene00021626	rft-2	156	-15.1	none available
cel-miR-230-3p	WBGene00010783	mrpl-36	146	-11.83	none available
cel-miR-77-3p	WBGene00022042	icd-2	151	-14.32	none available
cel-miR-77-3p	WBGene00002110	ins-27	140	-15.59	ins-27 encodes an insulin-like peptide.
cel-miR-77-3p	WBGene00001694	grd-5	140	-13.17	grd-5 encodes a hedgehog-like protein, with an N-terminal signal sequence and a C-terminal Ground domain; GRD-5 is expressed in adult anterior and posterior seam cells, overlapping GRD-3 expression; the Ground domain is predicted to form a cysteine-crosslinked protein involved in intercellular signalling, and it has subtle similarity to the N-terminal Hedge domain of HEDGEHOG proteins; GRD-5 is w…
cel-miR-77-3p	WBGene00022235	sqd-1	147	-16.84	none available
cel-miR-77-3p	WBGene00008205	sams-1	147	-15.8	sams-1 encodes an S-adenosyl methionine synthetase; by homology, SAMS-1 is predicted to function as a methyl-group donor in many biochemical reactions; sams-1 expression levels are negatively regulated by dietary restriction (as seen in eat-2 mutant animals), suggesting that increased lifespan due to dietary restriction is due, in part, to reducing the activity of key metabolic enzymes; loss of s…
cel-miR-77-3p	WBGene00020114	pde-4	145	-15.58	pde-4 encodes a cAMP phosphodiesterase orthologous to Drosophila dunce and the mammalian PDE4 family of phosphodiesterases; genetic analysis indicates that pde-4 activity is required for negative regulation of cAMP pools in the synaptic signaling network that controls locomotory rates and for regulation of sleep-like behavior (lethargus) during larval development; antibody staining of adult anima…
cel-miR-77-3p	WBGene00003053	lmp-1	145	-16.59	lmp-1 encodes a protein with similarity to vertebrate lysosome-associated membrane proteins CD68, and appears to be the only protein in C. elegans that has a GYXX (phi) vertebrate lysosomal targeting sequence at its carboxy terminus; LMP-1 is widely expressed in the early embryo, with later expression seen in the intestine, coelomocytes, and neurons; LMP-1 localizes to lysosomes and is recruited …
cel-miR-77-3p	WBGene00000472	cey-1	143	-14.23	cey-1 encodes a protein with a cold-shock/Y-box domain that is expressed in early embryonic blastomeres (at the 15-cell stage, i.e., pre-gastrulation), but is normally repressed in early germline blastomeres by PIE-1.
cel-miR-77-3p	WBGene00001840	hel-1	140	-20.76	hel-1 encodes an ortholog of human 56-kD U2AF65 associated protein (UAP56) that is required for exporting mRNAs from the nucleus; unlike animals with RNAi against several other splicing factors, hel-1(RNAi) animals fail to export transgenic GFP mRNA from the nucleus; conversely, hel-1 overexpression is lethal, with failed transgene expression as well.
cel-miR-77-3p	WBGene00006331	sup-26	141	-15.45	sup-26 encodes an RRM domain-containing protein; SUP-26 functions in somatic sex determination via negative regulation of tra-2 translation; SUP-26 binds the tra-2 28-nucleotide repeat element known as the TRA-2/GLI element (TGE), which is located in tra-2 3";untranslated region (UTR); SUP-26 physically interacts with the poly(A)-binding protein PAB-1, suggesting that it may control tra-2 transla…
cel-miR-77-3p	WBGene00003003	lin-14	290	-34.51	lin-14 encodes a novel protein whose activity is required for specifying the division timings of a specific group of cells during postembryonic development; lin-14 loss-of-function mutations result in the premature appearance of later larval lineages, while gain-of-function mutations result in reiteration of L1 larval stages lineages; in addition, lin-14 acts as a positive regulator of AVM, PVM, …
cel-miR-77-3p	WBGene00002066	ifg-1	148	-13.34	ifg-1 encodes, by alternative splicing, two orthologs of the translation initiation factor 4F, ribosome/mRNA-bridging subunit (eIF-4G); by homology, IFG-1 is predicted to function in poly(A) tail-dependent translation initiation; loss of ifg-1 activity in adult animals extends lifespan.
cel-miR-77-3p	WBGene00021852	Y54F10AM.8	152	-16.82	none available
cel-miR-77-3p	WBGene00001229	eif-3.F	142	-14.58	none available
cel-miR-77-3p	WBGene00021078	unc-132	147	-15.7	none available
cel-miR-77-3p	WBGene00006770	unc-34	142	-16.91	unc-34 encodes an EVH1 domain-containing protein that is the sole C. elegans Enabled/VASP homolog; during development, unc-34 activity is required for proper cell migration and axon guidance and for normal locomotion and posterior body morphology; in regulating axon guidance, genetic analyses suggest that unc-34 likely functions downstream of slt-1/Slit and sax-3/Robo as well as unc-6/Netrin and …
cel-miR-77-3p	WBGene00000366	cbp-1	147	-14.39	cbp-1 encodes a homolog of the mammalian transcriptional cofactors CBP (OMIM:600140) and p300 (E1A-BINDING PROTEIN, 300-KD; OMIM:602700) that have been shown to possess histone acetyltransferase activity, and which, when mutated, lead to Rubinstein-Taybi syndrome (OMIM:180849) and colorectal cancer (OMIM:114500); at least one splicing form of CBP-1 exhibits histone acetyltransferase (HAT) activit…
cel-miR-77-3p	WBGene00012850	Y44A6C.1	145	-13.15	none available
cel-miR-77-3p	WBGene00219271	F36H5.14	140	-16.84	none available
cel-miR-77-3p	WBGene00015608	math-3	141	-14.13	The C08F1.4 gene encodes a protein closely similar to F36H5.2, which has a meprin-associated Traf homology (MATH) domain and may be involved in apoptosis.
cel-miR-77-3p	WBGene00011279	asd-1	141	-12.65	asd-1 encodes an ortholog of human RBM9 et al., and paralog of FOX-1 and SPN-4; ASD-1 isoforms have an RNA recognition motif and 1-2 glutamine/asparagine-rich domains; ASD-1 and FOX-1 both bind a site in egl-15 mRNA that is required to repress exon 5B splicing into mature mRNA; ASD-1 alone is partly required for exon 5A expression in muscle cells, while FOX-1 alone is dispensable for it; double a…
cel-miR-77-3p	WBGene00000528	clh-1	154	-19.03	clh-1 encodes two CLC-type chloride channels via alternative splicing, homologous to human CLC1 (OMIM:118425) and CLC2 (OMIM:600570); CLH-1a and CLH-1b are required for maintenance of normal body shape; null mutations of clh-1 cause abnormal alae and a wider body than normal, with the body phenotype being reversible by culture medium of high osmolarity.
cel-miR-77-3p	WBGene00007317	C05A9.2	148	-18.38	none available
cel-miR-77-3p	WBGene00006808	unc-76	143	-13.86	unc-76 encodes a predicted coiled-coil protein that belongs to the FEZ (fasciculation and elongation protein; zygin/zeta-1) family of proteins; UNC-76 activity is required for normal axonal outgrowth and fasciculation and hence, normal locomotion; UNC-76 expression begins during embryogenesis and is present in all axons throughout development; UNC-76 localizes to both axons and cell bodies.
cel-miR-5551-5p	WBGene00006781	unc-45	299	-25.93	unc-45 encodes a conserved, muscle-specific protein that contains an N-terminal TRP (tetratricopeptide repeat) and a C-terminal UCS (UNC-45-CRO1-She4p) domain; during body wall muscle development, UNC-45 activity is essential for proper thick filament formation and sarcomere organization; in addition, maternally provided UNC-45 is required for embryonic polarity, cytokinesis, and germline cellula…
cel-miR-5551-5p	WBGene00001263	emb-9	145	-14.58	emb-9 encodes the alpha-1 chain of Type IV basement membrane collagen most closely equivalent to human COL4A1 (OMIM:120130) on the basis of biological function; EMB-9 forms heterotrimeric Type IV collagen with LET-2, the alpha-2-like chain, and is required for the assembly and/or secretion of LET-2; EMB-9 is essential for embryonic morphogenesis, particularly epidermal elongation, and for larval …
cel-miR-5551-5p	WBGene00000063	act-1	143	-14.71	act-1 encodes an actin isoform that is required for proper body wall muscle and pharyngeal muscle structures and the motility of animals; actins have highly similar amino acid sequences; ACT-1 is identical to ACT-3; act-1 functions redundantly with two other actin isoforms, act-2 and act-3, to control cytoplasmic microfilament function in the early embryo.
cel-miR-5551-5p	WBGene00006910	vha-1	144	-13.35	vha-1 encodes an ortholog of subunit c of the membrane-bound (V0) domain of vacuolar proton-translocating ATPase (V-ATPase); VHA-1 is a predicted V-ATPase transmembrane rotor component; VHA-1 and VHA-2/3 comprise a closely related family of subunit c co-orthologs, predicted to carry protons from the cytosol to a-subunits (VHA-5, VHA-6, VHA-7, or UNC-32) for transmembrane export; VHA-1, like VHA-1…
cel-miR-5551-5p	WBGene00000370	ccg-1	142	-12.92	none available
cel-miR-5551-5p	WBGene00012553	cco-2	151	-14.4	cco-2 encodes the C. elegans ortholog of the cytochrome c oxidase (COX) subunit Va (COX Va); loss of cco-2 activity via RNAi results in a shortened life span, reduced fertility, and defects in mitochondrial respiratory chain function.
cel-miR-5551-5p	WBGene00015248	mai-2	149	-14.85	mai-2/B0546.1 is orthologous to mitochondrial intrinsic ATPase inhibitor protein (IF(1)), which blocks reverse action (ATP hydrolysis) by F(0)F(1)-ATPase when its (normally required) proton gradient is lost; MAI-2 has a mitochondrial import signal at its N-terminus, and is transported to yeast mitochondria; MAI-2 can inhibit yeast F(0)F(1)-ATPase, and this inhibition is pH-dependent; MAI-2"s tert…
cel-miR-5551-5p	WBGene00003369	mlc-1	147	-16.81	mlc-1 encodes a muscle regulatory myosin light chain that is nearly identical to MLC-2 and functions redundantly with MLC-2 in the body-wall and in pharyngeal muscle to affect L1 larval viability, elongation, and pharyngeal and body-wall muscle development, and also affects locomotion and growth; expressed in the body-wall muscles, pharyngeal muscles, and vulval muscles.
cel-miR-5551-5p	WBGene00011869	dod-6	140	-9.83	none available
cel-miR-5551-5p	WBGene00009982	F53F1.4	143	-11.65	none available
cel-miR-5551-5p	WBGene00004300	ram-2	140	-9.65	ram-2 encodes a cuticle collagen that interacts with unc-6 to affect ray cell migration, and interacts with unc-5 and unc-6 to affect embryonic viability; also affects ray morphology in males such that the structural cells and the hypodermis of the rays are swollen in mutants.
cel-miR-5551-5p	WBGene00003515	myo-3	145	-14.65	myo-3 encodes MHC A, the minor isoform of MHC (myosin heavy chain) that is essential for thick filament formation, and for viability, movement, and embryonic elongation; expressed in body muscle, the somatic sheath cell covering the hermaphrodite gonad, and also expressed in enteric muscle, vulval muscles of the hermaphrodite and the diagonal muscles of the male tail.
cel-miR-5551-5p	WBGene00000473	cey-2	140	-14.22	cey-2 encodes a cold-shock/Y-box domain-containing protein; by homology, CEY-2 is predicted to function as either an RNA-binding protein involved in translation or RNA processing, or a DNA-binding protein involved in transcriptional regulation; cey-2 mRNA is expressed maternally in the early embryo, in a pattern characteristic of class II maternal RNAs, which are initially detected throughout the…
cel-miR-5551-5p	WBGene00003511	mxl-3	148	-9.11	mxl-3 encodes a basic helix-loop-helix transcription factor; an mxl-3 deletion mutation, tm2580, has been reported to exhibit a slight growth delay; in vitro, MXL-3 binds E-box and/or E-box-like sequences; an mxl-3 reporter fusion is expressed in larvae and adults and seen in head muscles and neurons, part of the intestine, and body hypodermis.
cel-miR-5551-5p	WBGene00006919	vha-10	146	-14.83	vha-10 encodes an ortholog of subunit G of the cytoplasmic (V1) domain of vacuolar proton-translocating ATPase (V-ATPase); VHA-10 is required for necrosis, since vha-10(RNAi) suppresses necrotic neurodegeneration and thapsigargin-induced cell death; VHA-10 is a predicted cytosolic stator (stalk) component.
cel-miR-5551-5p	WBGene00018512	trpp-8	160	-14.91	F46F11.9 encodes an ortholog of S. cerevisiae GSG1, involved in intracellular transport and meiosis; F46F11.9 shares an operon with vha-10, and thus might be a previously undescribed V-ATPase component or ancillary protein.
cel-miR-5551-5p	WBGene00003559	ncl-1	149	-13.29	ncl-1 encodes a cytoplasmic B-box zinc finger protein that negatively regulates rRNA and 5S RNA transcription, nucleolus size, and body size; NCL-1 is orthologous to Drosophila BRAIN TUMOR (BRAT), and ncl-1 mutants can be rescued by brat transgenes; NCL-1 is required for the normally small size of neuronal, muscle, and hypodermal nucleoli, and is already active in 4-cell embryos; NCL-1 may be a r…
cel-miR-5551-5p	WBGene00000380	cct-5	148	-15.56	cct-5 encodes, by alternative splicing, two isoforms of a putative epsilon subunit of the eukaryotic cytosolic ("T complex") chaperonin, orthologous to human CCT5 (OMIM:610150, mutated in sensory neuropathy with spastic paraplegia); CCT-5 represses SKN-1-dependent transcription of gst-4; in mass RNAi assays, cct-5 is required for normal embryonic osmotic integrity, transgene subcellular localizat…
cel-miR-5551-5p	WBGene00008404	D2013.6	298	-32.37	none available
cel-miR-5551-5p	WBGene00044134	D1025.10	165	-27.08	none available
cel-miR-5551-5p	WBGene00206419	R106.5	146	-14.15	none available
cel-miR-5551-5p	WBGene00001604	gln-3	143	-11.43	none available
cel-miR-5551-5p	WBGene00002010	hsp-6	141	-12.07	hsp-6 encodes a nuclear-encoded mitochondrion-specific chaperone that is a member of the DnaK/Hsp70 superfamily of molecular chaperones; hsp-6 is involved in the mitochondrial unfolded protein response, as hsp-6 expression, normally broadly detected from the L1 larval through adult stages of development, is greatly increased in response to treatments that disrupt mitochondrial protein handling; l…
cel-miR-5551-5p	WBGene00044650	Y71G10AR.4	144	-10.75	none available
cel-miR-5551-5p	WBGene00007645	C17E4.6	142	-14.72	none available
cel-miR-5551-5p	WBGene00022037	acs-13	294	-24.17	none available
cel-miR-5551-5p	WBGene00000277	cab-1	164	-16.56	Novel protein which has a C-terminal motif weakly homologous to mouse NPDC-1 and is involved in synaptic regulation; it is expressed in various neurons including ventral cord and tail ganglion neurons; it physically interacts with AEX-3, which is a guanine nucleotide exchange factor for the Rab3 GTPase.
cel-miR-5551-5p	WBGene00000552	cmd-1	145	-17.74	cmd-1 encodes a putative homolog of calmodulin 1 that affects growth rate and fertility.
cel-miR-5551-5p	WBGene00010408	mboa-2	297	-28.08	mboa-2 encodes a sterol O-acyltransferase orthologous to Drosophila MIDWAY, and to human DGAT1 (OMIM:604900); MBOA-2 has acyl-CoA:diacylglycerol O-acyltransferase activity when expressed in yeast; MBOA-2 has no obvious function in mass RNAi assays.
cel-miR-5551-5p	WBGene00003567	ncx-2	146	-13.8	ncx-2 encodes, by alternative splicing, three full-length isoforms of a putative 3Na[+]/1Ca[2+] exchanger, orthologous to human SLC8A1-3 and paralogous to NCX-1 and NCX-3; NCX-2 is predicted to export free cytoplasmic Ca[2+] with low affinity but high capacity, being complemented by low-capacity/high-affinity Ca[2+] ATPase pumps such as MCA-1/-3; NCX-3 has tandem Calx-alpha and Calx-beta domains …
cel-miR-5551-5p	WBGene00000814	csn-2	140	-11.41	csn-2 encodes a homolog of COP9 signalosome complex subunit 2 that affects embryonic viability and growth rate.
cel-miR-5551-5p	WBGene00013735	Y111B2A.12	149	-15.05	none available
cel-miR-5551-5p	WBGene00000041	aco-2	156	-12.38	aco-2 encodes an aconitase homolog that is required for embryonic viability, fertility, locomotion, and vulval morphogenesis, and perhaps for normal lifespan.
cel-miR-5551-5p	WBGene00011971	lron-9	145	-16.89	none available
cel-miR-5551-5p	WBGene00004274	rab-11.1	149	-14.6	rab-11.1 encodes a small GTPase homologous to the Rab GTPases that function in endocytosis, membrane fusion, and vesicular trafficking events; RAB-11.1 activity is required for completion of the final stages of cytokinesis during early embryogenesis and for efficient uptake of yolk proteins during oocyte development; RAB-11.1 is also required for normal peripheral localization of nuclei in the sy…
cel-miR-5551-5p	WBGene00001149	bcat-1	142	-13.71	bcat-1 encodes a branched-chain amino acid aminotransferase that, by homology, is predicted to catalyze the first reaction in the catabolism of essential branched-chain amino acids such as leucine, isoleucine, and valine; in C. elegans, large-scale RNA-mediated interference (RNAi) screens indicate that bcat-1 activity is required for embryonic and larval development.
cel-miR-5551-5p	WBGene00001840	hel-1	141	-7.28	hel-1 encodes an ortholog of human 56-kD U2AF65 associated protein (UAP56) that is required for exporting mRNAs from the nucleus; unlike animals with RNAi against several other splicing factors, hel-1(RNAi) animals fail to export transgenic GFP mRNA from the nucleus; conversely, hel-1 overexpression is lethal, with failed transgene expression as well.
cel-miR-5551-5p	WBGene00010135	F55H12.4	143	-17.98	none available
cel-miR-5551-5p	WBGene00010130	vha-14	140	-15.87	vha-14 encodes an ortholog of subunit D of the cytoplasmic (V1) domain of vacuolar proton-translocating ATPase (V-ATPase); VHA-14 is a predicted cytosolic rotor (stalk) component.
cel-miR-5551-5p	WBGene00006331	sup-26	141	-16.83	sup-26 encodes an RRM domain-containing protein; SUP-26 functions in somatic sex determination via negative regulation of tra-2 translation; SUP-26 binds the tra-2 28-nucleotide repeat element known as the TRA-2/GLI element (TGE), which is located in tra-2 3";untranslated region (UTR); SUP-26 physically interacts with the poly(A)-binding protein PAB-1, suggesting that it may control tra-2 transla…
cel-miR-5551-5p	WBGene00017016	snap-1	146	-12.19	none available
cel-miR-5551-5p	WBGene00009342	fasn-1	145	-15.93	fasn-1 encodes a fatty acid synthase, orthologous to human FASN (OMIM:600212); CEP-1 is required for fully normal fasn-1 expression in vivo; CEP-1 drives transcription of luciferase reporters whose promoters contains either of two putative CEP-1 binding sites (FAS-T1 and FAS-T2) found in the fasn-1 gene, and this activity is partially lost by mutation of conserved CEP-1 residues (R298 or H310); i…
cel-miR-5551-5p	WBGene00006888	vbh-1	143	-13.78	vbh-1 encodes a DEAD-box RNA helicase with similarity to Drosophila Vasa and Belle; vbh-1 activity is required for the proper timing of the sperm-oocyte switch during germ line development; vbh-1 also plays a role in embryonic development; in regulating germ line development, vbh-1 appears to function at least partially redundantly with laf-1, which also encodes a DEAD-box RNA helicase; VBH-1 is …
cel-miR-5551-5p	WBGene00014023	lnkn-1	143	-21.02	lnkn-1 encodes a conserved, single-pass type I transmembrane glycoprotein with seven atypical FG-GAP domains in the extracellular domain, which potentially folds into a beta-propeller structure resembling the alpha-integrin ligand-binding domain; LNKN-1 is necessary for attachment of the male linker cell to the developing vas deferens and thus for normal male gonad migration; LNKN-1 is also requi…
cel-miR-5551-5p	WBGene00009812	suca-1	293	-16.75	none available
cel-miR-5551-5p	WBGene00006768	unc-32	148	-14.73	unc-32 encodes, by alternative splicing, six isoforms of an ortholog of subunit a of the membrane-bound (V0) domain of vacuolar proton-translocating ATPase (V-ATPase); UNC-32 is orthologous to human ATP6N1A (OMIM:192130), ATP6V0A2, ATP6V0A4 (OMIM:605239, mutated in distal renal tubular acidosis), and TCIRG1 (OMIM:604592, mutated in osteopetrosis); one UNC-32 isoform is essential for locomotion an…
cel-miR-5551-5p	WBGene00002981	lgg-2	161	-16.93	lgg-2 encodes an ortholog of the autophagic budding yeast protein Atg8p; LGG-2 is also homologous the light chain 3 (LC3) subunit of the microtubule-associated proteins 1A and 1B (MAP1A and MAP1B); LGG-2 is predicted to associate with MAP1A and MAP1B and with microtubules and to perhaps play a role in regulating the microtubule-binding activity of MAP1A and MAP1B; LGG-2 has no obvious function in…
cel-miR-5551-5p	WBGene00008019	C38H2.2	148	-13.54	C38H2.2 encodes a core 1 UDP-Gal:GalNAcalpha1-Ser/Thr beta1,3-galactosyltransferase (core 1 beta3-Gal-T or T-synthase, EC2.4.1.122); C38H2.2 protein is predicted to be primarily extracellular, with an N-terminal transmembrane domain; C38H2.2 shares 6 conserved cysteine residues with all known T-synthases, and is ubiquitously expressed; enzymatically active C38H2.2 can be generated from insect but…
cel-miR-5551-5p	WBGene00002783	let-607	149	-18.77	let-607 encodes an ortholog of the Cyclic AMP-responsive Element-Binding (CREB) family of transcription factors.
cel-miR-5551-5p	WBGene00003003	lin-14	297	-25.3	lin-14 encodes a novel protein whose activity is required for specifying the division timings of a specific group of cells during postembryonic development; lin-14 loss-of-function mutations result in the premature appearance of later larval lineages, while gain-of-function mutations result in reiteration of L1 larval stages lineages; in addition, lin-14 acts as a positive regulator of AVM, PVM, …
cel-miR-5551-5p	WBGene00000113	alh-7	440	-46.23	alh-7 encodes an ortholog of the human gene DJ73M23.2 (NAD+-DEPENDENT SUCCINIC SEMIALDEHYDE DEHYDROGENASE; ALDH5A1), which when mutated leads to SSADH deficiency (OMIM:271980).
cel-miR-5551-5p	WBGene00003777	nmy-2	160	-10.89	nmy-2 encodes a non-muscle myosin II; NMY-2 is required for polarized cytoplasmic flow, polarized distribution of the PAR proteins, cytokinesis, and for proper anterior-posterior polarity in early embryos; NMY-2 functions with PAR-5 in the onset of the establishment phase of polarization in the C. elegans zygote along the anterior-posterior axis, and nmy-2 is partially redundant with nmy-1 with r…
cel-miR-5551-5p	WBGene00010117	nkb-3	152	-13.35	none available
cel-miR-5551-5p	WBGene00011481	imp-2	151	-18.62	none available
cel-miR-5551-5p	WBGene00010619	K07A1.15	144	-9.7	none available
cel-miR-5551-5p	WBGene00007030	epc-1	149	-13.91	none available
cel-miR-5551-5p	WBGene00003030	lin-45	148	-18.35	The lin-45 gene encodes an ortholog of the vertebrate protein RAF which is required for larval viability, fertility and the induction of vulval cell fates.
cel-miR-5551-5p	WBGene00010738	K10D3.4	142	-12.33	none available
cel-miR-5551-5p	WBGene00002190	kin-2	143	-19.31	kin-2 encodes a predicted regulatory subunit of a cAMP-dependent protein kinase that may act downstream of, or in parallel to, ric-8.
cel-miR-5551-5p	WBGene00009580	xbx-6	143	-27.48	none available
cel-miR-5551-5p	WBGene00002023	hsp-25	143	-12.4	hsp-25 encodes a member of the small heat shock family of proteins; HSP-25 is expressed throughout development and in vitro, exhibits chaperone activity; HSP-25 localizes to: 1) dense bodies and M lines in body wall muscle, 2) the lining of the pharynx, and 3) to cell-cell junctions in the spermathecal wall; consistent with a role in myofibril organization, HSP-25 binds vinculin and alpha-actinin…
cel-miR-5551-5p	WBGene00006833	unc-108	294	-27.12	unc-108 encodes a small GTPase homologous to the Rab GTPases that function in endocytosis, membrane fusion, and vesicular trafficking events; unc-108 function is required in neurons for normal locomotion; unc-108 also functions in the removal of apoptotic cells, specifically it functions in engulfing cells for the recruitment and fusion of the lysosome to the phagosome; unc-108 is expressed in ne…
cel-miR-5551-5p	WBGene00004110	pqn-20	140	-15.05	The protein product of this gene is predicted to contain a glutamine/asparagine (Q/N)-rich ("prion") domain, by the algorithm of Michelitsch and Weissman (as of the WS77 release of WormBase, i.e., in wormpep77).
cel-miR-5551-5p	WBGene00019347	mbl-1	304	-37.44	mbl-1 encodes, by alternative splicing, two isoforms of a putative MUSCLEBLIND-type mRNA splicing regulator required in adults for normal muscle dense body organization, locomotion, and vulval morphogenesis; MBL-1 is orthologous to Drosophila MBL and human MBNL1 (OMIM:606516), MBNL2 (OMIM:607327), and MBNL3 (OMIM:300413); mbl-1 is transcribed in larvae and adults; mbl-1(RNAi) animals show protrud…
cel-miR-5551-5p	WBGene00001340	etr-1	143	-16.85	etr-1 encodes a muscle-specific ELAV-type RNA-binding protein, whose homologs include Drosophila ELAV and human CUG-BINDING PROTEIN (CUGBP1; OMIM:601074); etr-1 function is required for embryonic muscle development, which suggests that ETR-1"s homology to CUG-BP (implicated in myotonic dystrophy) might reflect conserved roles in development.
cel-miR-5551-5p	WBGene00020738	T23F2.5	145	-15.09	none available
cel-miR-5551-5p	WBGene00010425	lpin-1	160	-19.47	lpin-1 encodes a putative phosphatidic acid phosphatase orthologous to budding yeast PAH1 and human LPIN1 (OMIM:605518), LPIN2 (OMIM:605519, mutated in Majeed syndrome), and LPIN3 (OMIM:605520); lpin-1 is expressed in vulval muscle; in mass RNAi assays, lpin-1 is required for the osmotic integrity of eggs and for normal larval growth, body thickness, locomotion, and fertility; by orthology, LPIN-…
cel-miR-5551-5p	WBGene00006423	asd-2	140	-14.64	asd-2 encodes, by alternative splicing, three isoforms of a signal transduction and activation of RNA (STAR protein) orthologous to human QKI (OMIM:609590) and Drosophila HOW, and paralogous to C. elegans GLD-1; ASD-2 is required for normal axonal guidance, developmentally regulated mRNA splicing, and correct protein folding in vivo; ASD-2 is required for the mutually exclusive splicing of let-2 …
cel-miR-5551-5p	WBGene00001229	eif-3.F	151	-17.03	none available
cel-miR-5551-5p	WBGene00004744	scp-1	152	-12.62	scp-1 encodes PTC-related protein that contains a sterol-sensing domain related to human Sterol regulatory element binding protein (SREBP) cleavage activating protein.
cel-miR-5551-5p	WBGene00003826	ntl-3	145	-11.95	ntl-3 is the ortholog of NOT3/NOT5, a member of a protein complex also predicted to contain ccf-1/Y56A3A.20 (CAF1/POP2); ntl-3 is required for embryonic viability in mass RNAi assays.
cel-miR-5551-5p	WBGene00012216	W02D9.10	140	-22.01	none available
cel-miR-5551-5p	WBGene00003400	dapk-1	294	-30.1	dapk-1 encodes the C. elegans ortholog of the tumor suppressor death-associated protein (DAP) kinase; dapk-1 functions in epidermal cells to regulate epithelial damage responses; specifically dapk-1 acts as a negative regulator of barrier repair and the TIR-1-mediated innate immune response to wounding; dapk-1 also functions downstream of, or in parallel to, muscarinic signaling in the regulation…
cel-miR-5551-5p	WBGene00004134	myrf-1	144	-16.97	myrf-1 encodes a protein with a glutamine/asparagine-rich domain, orthologous to human MYRF (myelin regulatory factor); in C. elegans, MYRF-1 activity is required for regulation of the molting cycle, specifically the completion of larval molts and cessation of molting in reproductively mature adult animals; a MYRF-1::GFP fusion protein is expressed in a wide variety of cells and tissues, includin…
cel-miR-5551-5p	WBGene00008764	dylt-1	140	-14.55	dylt-1 encodes a putative dynein light chain subunit that inhibits DHC-1 in vivo, but is otherwise dispensable for viability; DYLT-1 is paralogous to DYLT-3, and orthologous to human DYNLT1 and DYNLT3 (OMIM: 300302); dylt-1(RNAi) and dylt-1(ok417) both suppress the lethality of conditional dhc-1 mutations, and dylt-1(RNAi) suppresses dhc-1(or195) spindle length and cytokinesis defects as well, in…
cel-miR-5551-5p	WBGene00006770	unc-34	145	-9.02	unc-34 encodes an EVH1 domain-containing protein that is the sole C. elegans Enabled/VASP homolog; during development, unc-34 activity is required for proper cell migration and axon guidance and for normal locomotion and posterior body morphology; in regulating axon guidance, genetic analyses suggest that unc-34 likely functions downstream of slt-1/Slit and sax-3/Robo as well as unc-6/Netrin and …
cel-miR-5551-5p	WBGene00012362	W09D10.4	148	-14.66	none available
cel-miR-5551-5p	WBGene00012850	Y44A6C.1	144	-12.08	none available
cel-miR-5551-5p	WBGene00007016	mdt-15	148	-10.72	mdt-15 encodes, by alternative splicing, two isoforms of a Mediator subunit orthologous to human MED15 (OMIM:607372, deleted in DiGeorge syndrome); together with NHR-49 and SBP-1, MDT-15 is required for normal fat accumulation, for expression of fatty acid (FA) desaturase genes (fat-5, fat-6, and fat-7), for normal levels of mono- and polyunsaturated FAs (PUFAs), and for viability, fecundity, mob…
cel-miR-5551-5p	WBGene00017814	F26A10.2	147	-15.08	F26A10.2 encodes a protein with four zinc-finger domains and a glutamine/asparagine-rich domain, that is required for maintenance of the germline and for locomotion; F26A10.2(RNAi) animals are uncoordinated and have sterile progeny.
cel-miR-5551-5p	WBGene00004268	rab-5	283	-30.67	rab-5 encodes the C. elegans Rab5 GTPase ortholog; RAB-5 activity is required for receptor-mediated yolk endocytosis and for phagosome maturation involved in apoptotic cell clearance; rab-5 mutations also affect localization of P granules and PAR-2, as well as the cytoplasmic appearance of cells in the early embryo and larval development; RAB-5 localizes to early endosomes and maturing phagosomes.
cel-miR-5551-5p	WBGene00008733	F13B12.6	145	-11.64	none available
cel-miR-5551-5p	WBGene00001837	hda-4	149	-16.91	hda-4 encodes a class II histone deacetylase that contains a putative MEF-2 DNA binding domain, a nuclear localization signal domain, and a single catalytic domain and may affect locomotion, body morphology, and growth; interacts with MEF-2 in in vitro assays and is expressed in body-wall muscle, neurons, and hypodermal seam cells
cel-miR-5551-5p	WBGene00017921	F29B9.5	143	-9.04	none available
cel-miR-5551-5p	WBGene00002889	let-765	151	-17.37	none available
cel-miR-5551-5p	WBGene00009164	hrdl-1	144	-17.18	none available
cel-miR-5551-5p	WBGene00015061	cpna-2	141	-8.5	cpna-2 encodes proteins with similarity to several InterPro domains including those of polycystin cation channels, von Willebrand factor, the DNA recombination repair protein BRCA2, protein-tyrosine phosphatase, non-receptor type-13, glyoxylate carboligase, and copines, Ca2+-dependent phosphatidylserine binding proteins; cpna-2::gfp reporter fusions are expressed in body wall muscle.
cel-miR-5551-5p	WBGene00006697	uaf-1	144	-15.03	uaf-1 encodes the large subunit of splicing factor U2AF (U2 Auxiliary Factor), orthologous to mammalian and Drosophila U2AF65; UAF-1 has been shown to bind RNA and this binding is enhanced by UAF-2; the abundance of one alternative transcript appears to be increased during starvation and this transcript is retained in the nucleus; uaf-1 affects embryonic viability, based on RNAi analysis.
cel-miR-5551-5p	WBGene00008218	nasp-2	141	-21.58	none available
cel-miR-5551-5p	WBGene00006936	vars-2	148	-14.8	vrs-2 encodes a predicted cytoplasmic valyl-tRNA synthetase (ValRS), a class I aminoacyl-tRNA synthetase that catalyzes the attachment of valine to its cognate tRNA and is thus required for protein biosynthesis; in C. elegans, VRS-2 activity is required for embryonic and germline development.
cel-miR-5551-5p	WBGene00004951	spc-1	153	-13.4	spc-1 encodes the C. elegans alpha spectrin ortholog; during development, spc-1 activity is required for body morphogenesis, formation of body wall muscles, locomotion, and larval development.
cel-miR-5551-5p	WBGene00011146	pde-2	143	-11.74	none available
cel-miR-5551-5p	WBGene00007227	C01G6.5	141	-14.79	none available
cel-miR-5551-5p	WBGene00007505	pezo-1	142	-13.3	none available
cel-miR-5551-5p	WBGene00002203	kin-20	143	-14.57	none available
cel-miR-5551-5p	WBGene00006407	lim-9	287	-22.75	lim-9 encodes a protein containing one PET domain and six LIM domains and is orthologous to Drosophila LIMPET and vertebrate FHL2; in vitro binding and yeast two-hybrid assays indicate that LIM-9 physically interacts with UNC-96 and UNC-97 and thus, is likely a component of a protein complex that links muscle focal adhesions to thick filaments; LIM-9 also enables Wnt-directed planar cell polarity…
cel-miR-5551-5p	WBGene00012600	Y38E10A.22	143	-12.73	none available
cel-miR-5551-5p	WBGene00003404	mpz-1	145	-15.53	mpz-1 encodes a multi-PDZ domain scaffold protein; mpz-1(RNAi) animals have reduced serotonin (5-HT)-stimulated egg laying unless truncated SER-1 is transgenically expressed in vulval muscle; overexpressed MPZ-1 PDZ domain 10 also reduces SER-1-mediated egg laying; the PDZ domain 10 of MPZ-1 binds the C-terminal PDZ-binding motif (ETFL) of the 5-HT receptor SER-1; MPZ-1 also physically interacts …
cel-miR-5551-5p	WBGene00016158	ari-1	159	-14.28	none available
cel-miR-5551-5p	WBGene00000068	acy-1	155	-16.47	acy-1 encodes an adenylyl cyclase that is most closely related to the divergent mouse isoform type IX; acy-1 is required for viability, muscle contraction, locomotion, molting, and regulation of sleep-like behavior (lethargus) during larval development; acy-1 acts genetically downstream of gsa-1 and is expressed in excitable cells.
cel-miR-5551-5p	WBGene00000518	ckk-1	140	-17.66	ckk-1 encodes a serine/threonine protein kinase that is the C. elegans calcium and calmodulin-dependent protein kinase kinase (CaM-KK) ortholog; ckk-1 activity is required for CRE-dependent transcription in neurons; when expressed in vitro, CKK-1 is capable of stimulating the kinase activity of a downstream kinase, either C. elegans CMK-1 or recombinant mouse CaM-KIV, in a Ca2+/calmodulin-depende…
cel-miR-5551-5p	WBGene00009285	F31C3.3	155	-17.59	none available
cel-miR-5551-5p	WBGene00006321	sup-12	148	-21.77	sup-12 encodes an RNA-binding protein that contains a conserved RNA recognition motif (RRM); during development, SUP-12 functions as a muscle-specific splicing factor to regulate alternative pre-mRNA processing of unc-60 and egl-15 transcripts; in vitro, SUP-12 can bind intronic regions of the unc-60 and egl-15 pre-mRNAs; specifically, SUP-12 binds the unc-60 intron 1A cooperatively with ASD-2, w…
cel-miR-5551-5p	WBGene00006798	unc-64	143	-11.06	unc-64 encodes syntaxin, a plasma membrane receptor for intracellular vesicles that is orthologous to vertebrate syntaxin 1A (OMIM:186590) and Drosophila Syx1A; UNC-64 is required for normal locomotion and possibly also for insulin secretion; as an essential component of the core synaptic vesicle fusion machinery, UNC-64 interacts with UNC-13, a diacylglycerol-binding protein, and SNB-1/synaptobr…
cel-miR-5551-5p	WBGene00003793	npp-7	146	-17.85	none available
cel-miR-5551-5p	WBGene00004739	scd-1	141	-12.72	scd-1 encodes a novel protein with several regions that are extremely glutamine (Q) rich, interspersed with other residues (usually alanine); SCD-1 affects signalling by proteins in the DAF-7/transforming growth factor (TGF)-beta pathway (DAF-1, DAF-8, and DAF-14), and the Q-rich regions of SCD-1 protein may mediate epigenetic changes of stably heritable tertiary conformation.
cel-miR-5551-5p	WBGene00000040	aco-1	144	-13.43	aco-1 encodes an aconitase that is homologous to mammalian iron regulatory protein-1 (IRP1); aco-1 activity is required for normal brood sizes and, under iron stress conditions, for normal lifespan and L4-to-adult growth rates; ACO-1 physically interacts with GEX-3; like IRP1, ACO-1 has aconitase activity and is post-translationally regulated by iron, but, unlike IRP1, it lacks RNA-binding activi…
cel-miR-5551-5p	WBGene00003903	pab-2	142	-11.47	pab-2 encodes a polyadenylate-binding protein 1 homolog with high similarity to human PABP 1.
cel-miR-5551-5p	WBGene00008577	F08G2.5	153	-19.43	none available
cel-miR-5551-5p	WBGene00000942	deb-1	299	-25.15	The deb-1 gene encodes a vinculin ortholog highly conserved amongst metazoans including Drosophila, chick, and humans (OMIM:193065); DEB-1 is a muscle attachment protein found in dense bodies, and is required for attaching actin thin filaments to the basal sarcolemma; DEB-1 requires PAT-4/integrin-linked kinase for full assembly into nascent attachments.
cel-miR-5551-5p	WBGene00012730	xrn-1	144	-14.11	xrn-1 encodes a 5"-3" exoribonuclease that is orthologous to Saccharomyces cerevisiae Xrnp1, a key component of the yeast 5"-3" mRNA degradation pathway; in C. elegans, XRN-1 activity is required during embryogenesis for completion of ventral enclosure, the morphogenetic process whereby the ventral epithelial cells cover and seal the interior cells of the embryo; in addition, XRN-1 also plays a r…
cel-miR-5551-5p	WBGene00008878	ppfr-1	143	-18.95	ppfr-1 encodes a protein phosphatase regulatory subunit; PPFR-1 functions as a regulatory subunit of a protein phosphatase 4 complex that regulates the phosphorylation status, and activity of, the MEI-1/katanin microtubule severing activity during meiosis; ppfr-1(RNAi) in wild-type animals results in fertility defects in F1 hermaphrodites, who exhibit a 90-95% decrease in the total number of eggs…
cel-miR-5551-5p	WBGene00000393	cdf-1	151	-15.85	cdf-1 encodes a protein similar to members of the cation diffusion facilitator (CDF) family of transmembrane proteins and is most similar to vertebrate ZnT-1; two other elegans CDF proteins, cdf-2 and sur-7 have also been identified; CDF proteins regulate the transport of heavy metal ions like zinc; cdf-1 positively regulates Ras-mediated signaling during vulval development, most likely by promot…
cel-miR-5551-5p	WBGene00001574	gei-17	144	-17.08	gei-17 encodes a SUMO E3 ligase; during embryonic development, GEI-17 activity is required for maintaining normal levels of the DNA polymerase eta POLH-1, and hence checkpoint silencing, in embryos exposed to DNA damage; gei-17 mutations affect embryonic viability, vulval development, and body morphology; in vitro, GEI-17 has been demonstrated to sumoylate AIR-2, MUS-101, POLH-1, as well as to un…
cel-miR-5551-5p	WBGene00003741	nlp-3	140	-14.97	nlp-3 encodes a neuropeptide-like protein of the GFxGF family with similarity to orcokinins, highly conserved peptides native to crustaceans that enhance hindgut contractions; NLP-3 is expressed in neurons in the head, pharynx, and vulva, and in the intestine; the precise role of NLP-3 in nervous system function and development is not yet clear.
cel-miR-5551-5p	WBGene00016194	C28H8.3	147	-13.11	none available
cel-miR-5551-5p	WBGene00001329	epn-1	141	-13.93	none available
cel-miR-5551-5p	WBGene00014096	ZK829.7	149	-9.55	none available
cel-miR-5551-5p	WBGene00003052	lmn-1	157	-19.55	lmn-1 encodes the sole C. elegans nuclear lamin; lmn-1 is an essential gene that is required for a number of nuclear processes, including chromatin organization, cell cycle progression, chromosome segregation, and nuclear pore complex spacing; LMN-1 is also required for nuclear envelope localization of EMR-1/Emerin during early development; LMN-1 localizes to the nuclear periphery of all cell typ…
cel-miR-5551-5p	WBGene00009004	pfd-6	155	-19.53	pfd-6 encodes a putative prefoldin 6 subunit, orthologous to human PFDN6 (OMIM:605660), required for normal microtubule growth and distal tip cell migration; PFD-6 is expressed cytoplasmically in most, if not all, tissues, including the germline; in mass RNAi assays, PFD-6 is required for normal mitotic spindle position, embryonic and larval viability, fertility, body shape, vulval development, a…
cel-miR-5551-5p	WBGene00010621	egg-6	151	-13.25	egg-6 encodes an extracellular leucine-rich repeat protein; egg-6 is required for proper organization of the apical extracellular matrix.
cel-miR-5551-5p	WBGene00004063	pmr-1	140	-16.03	The pmr-1 gene encodes a Golgi P-type ATPase Ca^2+/Mn^2+-pump; mutations in its human ortholog, ATP2C1, cause Hailey-Hailey disease (OMIM:169600).
cel-miR-5551-5p	WBGene00004749	sdn-1	144	-13.49	sdn-1 encodes a homolog of vertebrate syndecan-2, a type I transmembrane heparan sulfate proteoglycan; by homology, SDN-1 is predicted to play a role in cell-cell and cell-matrix adhesion; loss of sdn-1 activity via RNA-mediated interference (RNAi) indicates that SDN-1 is required for backward locomotion and for normal development of the egg-laying system, particularly gonadal and vulval structur…
cel-miR-5551-5p	WBGene00002179	jph-1	140	-15.64	jph-1 encodes a junctophilin, a protein that belongs to a transmembrane family of proteins implicated in the formation of the junctional membrane complex that forms between the plasma membrane and the endoplasmic reticulum in excitable cells; this complex facilitates cross-talk between the cell surface and intracellular ionic channels; RNA interference of jph-1 results in a locomotion defect sugg…
cel-miR-5551-5p	WBGene00019593	K09F6.10	141	-14.3	none available
cel-miR-5551-5p	WBGene00001056	dpf-3	142	-13.38	none available
cel-miR-5551-5p	WBGene00004729	sax-3	142	-13.74	sax-3 encodes, by alternative splicing, two isoforms of an ortholog of Drosophila ROUNDABOUT, ROBO3, and LEAK, and of human ROBO1, ROBO2 (OMIM:602431, mutated in vesicoureteral reflux), and ROBO3 (OMIM:608630, mutated in horizontal gaze palsy with progressive scoliosis); in larval hermaphrodites, SAX-3 is required to confine migrating sex myoblasts to the ventral muscle quadrants during their mig…
cel-miR-5551-5p	WBGene00006975	zfp-1	143	-16.42	zfp-1 encodes a leucine zipper, zinc finger, and PHD/LAP domain (plant homeodomain/leukemia-associated protein)-containing protein homologous to human AF10 (OMIM:602409, which is involved in chromosomal translocations associated with acute leukemia); loss of zfp-1 activity via RNA-mediated interference (RNAi) results in suppression of RNAi, suggesting that ZFP-1 plays a role in gene silencing; ba…
cel-miR-5551-5p	WBGene00010280	rde-12	146	-15.72	none available
cel-miR-5551-5p	WBGene00001496	frm-10	156	-11.46	frm-10 encodes a protein that contains an N-terminal FERM (Band 4.1-ezrin-radixin-moesin) domain; by homology, FRM-10 is predicted to function as a membrane-cytoskeleton linker protein that plays a role in cell adhesion, migration, or organization of cell surface structures; however, as loss of frm-10 activity via large-scale RNAi screens does not result in any obvious abnormalities, the precise …
cel-miR-5551-5p	WBGene00004855	sma-1	148	-10.82	sma-1 encodes a beta-H spectrin; during embryonic morphogenesis, SMA-1 activity is required for a normal rate of elongation and thus, for a wild-type body length upon hatching; in addition, SMA-1 is required for proper morphogenesis of the pharynx and the excretory cell; sma-1 mRNA transcripts are first detected in hypodermal cells at the beginning of embryonic morphogenesis with later expression…
cel-miR-5551-5p	WBGene00021948	kvs-5	142	-11.94	none available
cel-miR-34-5p	WBGene00003893	ost-1	147	-27.83	ost-1 encodes the C. elegans ortholog of the conserved basement membrane glycoprotein component osteonectin/SPARC/BM-40; loss of ost-1 function via RNAi indicates that ost-1 activity is required for embryonic and larval development, as well as for normal gut development, body size, and fecundity; an OST-1::GFP reporter fusion protein localizes to the basement membranes along body wall and sex mus…
cel-miR-34-5p	WBGene00002280	let-2	148	-21.07	let-2 encodes an alpha-2 type IV collagen, probably most closely equivalent to the human gene COL4A2 (OMIM:120090) on the basis of biological function; LET-2 is required for embryonic development and is a component of the basement membrane between muscle and hypodermis; LET-2 interacts with UNC-105, a mechanosensory ion channel of the degenerin ion channel superfamily that is expressed in muscle …
cel-miR-34-5p	WBGene00000088	aex-5	140	-16.49	an ortholog of calcium-dependent serine endoproteinases, the kex2/subtilisin-like proprotein convertase that affects defecation cycle and anterior body contractions; and is expressed in all muscle cells except pharyngeal muscles.
cel-miR-34-5p	WBGene00004798	sip-1	145	-20.36	sip-1 encodes a member of the small heat shock family of proteins; loss of sip-1 function via antisense or large-scale RNAi experiments results in embryonic lethality and in a small but reproducible reduction in lifespan in otherwise long-lived animals, respectively, suggesting that sip-1 plays a role in embryonic development as well as regulation of adult lifespan; in addition, expression of sip…
cel-miR-34-5p	WBGene00019947	htz-1	150	-22.25	htz-1 encodes the C. elegans ortholog of the H2A.Z histone variant; htz-1 is an essential gene and during development, HTZ-1 functions with the PHA-4/FoxA transcription factor and the MYS-1/TIP60-SSL-1/SWR1 remodeling complex to regulate gene expression during pharyngeal (foregut) organogenesis; a YFP::HTZ-1 fusion protein localizes to pharyngeal gene promoters at the onset of transcription, in a…
cel-miR-34-5p	WBGene00000473	cey-2	140	-21.6	cey-2 encodes a cold-shock/Y-box domain-containing protein; by homology, CEY-2 is predicted to function as either an RNA-binding protein involved in translation or RNA processing, or a DNA-binding protein involved in transcriptional regulation; cey-2 mRNA is expressed maternally in the early embryo, in a pattern characteristic of class II maternal RNAs, which are initially detected throughout the…
cel-miR-34-5p	WBGene00011880	T21B6.3	145	-15.61	The protein product of this gene is predicted to contain a glutamine/asparagine (Q/N)-rich ("prion") domain, by the algorithm of Michelitsch and Weissman (as of the WS77 release of WormBase, i.e., in wormpep77).
cel-miR-34-5p	WBGene00006754	unc-15	149	-19.26	The unc-15 gene encodes a paramyosin ortholog; UNC-15 protein physically interacts with MHC A, one isoform of myosin heavy chain (MHC) in striated muscle; UNC-15 accumulation is decreased in the absence of UNC-54 (myosin B), implying that degradation of UNC-15 is inhibited by its binding myosin B; conversely, myosin B (but not MYO-3/myosin A) fails to accumulate in unc-15 mutants.
cel-miR-34-5p	WBGene00006787	unc-52	141	-16.95	The unc-52 gene encodes perlecan, a protein orthologous to human basement membrane-specific heparan sulfate proteoglycan core protein (HSPG2; OMIM:142461, which when mutated leads to Schwartz-Jampel syndrome or dyssegmental dysplasia); UNC-52 plays essential roles in muscle structure development and regulation of growth factor-like signaling pathways; UNC-52 is synthesized by the hypodermis and l…
cel-miR-34-5p	WBGene00013682	Y105E8A.25	146	-20.08	none available
cel-miR-34-5p	WBGene00007645	C17E4.6	302	-38.71	none available
cel-miR-34-5p	WBGene00004274	rab-11.1	145	-18.83	rab-11.1 encodes a small GTPase homologous to the Rab GTPases that function in endocytosis, membrane fusion, and vesicular trafficking events; RAB-11.1 activity is required for completion of the final stages of cytokinesis during early embryogenesis and for efficient uptake of yolk proteins during oocyte development; RAB-11.1 is also required for normal peripheral localization of nuclei in the sy…
cel-miR-34-5p	WBGene00003989	pfn-1	141	-17.08	pfn-1 encodes a profilin; pfn-1 is required for embryonic cytokinesis, specifically for the assembly or maintenance of cortical microfilaments and myosin; PFN-1 physically interacts with the CYK-1 Formin Homology protein; PFN-1 localizes to the cell cortex.
cel-miR-34-5p	WBGene00006803	unc-70	148	-25.8	unc-70 encodes two isoforms of a beta-spectrin ortholog required for normal body curvature and shape, normal movement, and correct localization of the alpha-spectrin SPC-1; the predominant UNC-70 isoform is expressed in all embryonic cells except the intestine, at the plasma membrane at sites of intercellular contact; UNC-70 becomes largely restricted to muscles and neurons from hatching to adult…
cel-miR-34-5p	WBGene00004175	pqn-96	147	-24.57	The protein product of this gene is predicted to contain a glutamine/asparagine (Q/N)-rich ("prion") domain, by the algorithm of Michelitsch and Weissman (as of the WS77 release of WormBase, i.e., in wormpep77).
cel-miR-34-5p	WBGene00004465	rpn-9	146	-16.34	rpn-9 is predicted to encode a non-ATPase subunit of the 19S regulatory complex of the proteasome that that affects body morphology, embryonic viability, locomotion, larval viability, fertility, and growth; interacts with RPN-11 in yeast two-hybrid assays.
cel-miR-34-5p	WBGene00021854	Y54F10AR.1	147	-21.36	none available
cel-miR-34-5p	WBGene00004130	ketn-1	140	-15.73	ketn-1 encodes an ortholog of kettin (in D. melanogaster, SALLIMUS), an invertebrate isoform or paralog of titin; ketn-1 is transcriptionally upregulated two-fold by hypoxia, requires both HIF-1 and VHL-1 for this induction, and contains three predicted HIF-1 binding sites in its predicted 5" regulatory region; ketn-1"s induction by hypoxia correlates with upregulation of other genes required for…
cel-miR-34-5p	WBGene00002915	let-805	144	-14.12	let-805 encodes myotactin, a novel single-transmembrane protein containing extracellular fibronectin repeats; genetic analyses indicate that LET-805 is essential for proper association between hypodermal fibrous organelles and the contractile apparatus of muscle cells; LET-805 is expressed in hypodermal cells and in the pharynx and localizes to basolateral membranes.
cel-miR-34-5p	WBGene00003397	mom-5	142	-22.66	mom-5 encodes one of four C. elegans members of the Frizzled (Fz) family of seven transmembrane receptors; during development, MOM-5 activity is required for asymmetric cell division in the early embryo and during neuronal development, and for attachment of the pharynx to the buccal cavity; MOM-5 is also required for distal tip cell migration in the gonad and for the engulfment of apoptotic cells…
cel-miR-34-5p	WBGene00006798	unc-64	150	-15.9	unc-64 encodes syntaxin, a plasma membrane receptor for intracellular vesicles that is orthologous to vertebrate syntaxin 1A (OMIM:186590) and Drosophila Syx1A; UNC-64 is required for normal locomotion and possibly also for insulin secretion; as an essential component of the core synaptic vesicle fusion machinery, UNC-64 interacts with UNC-13, a diacylglycerol-binding protein, and SNB-1/synaptobr…
cel-miR-34-5p	WBGene00001208	egl-44	159	-24.52	egl-44 encodes a transcription enhancer factor of the TEA domain (TEAD) class; egl-44 activity is required to repress the touch cell fate in some cells and to promote aspects of HSN differentiation; EGL-44 physically interacts with YAP-1, a C. elegans Yes-associated protein (YAP) homolog, and when co-expressed, the two proteins are able to activate a TEAD reporter; an EGL-44::GFP fusion protein i…
cel-miR-34-5p	WBGene00001955	hlh-11	151	-19.25	none available
cel-miR-34-5p	WBGene00001560	gei-3	144	-20.1	gei-3 encodes a member of the high mobility group (HMG) protein family; interacts with GEX-3 in yeast two-hybrid assays.
cel-miR-34-5p	WBGene00003052	lmn-1	149	-16.15	lmn-1 encodes the sole C. elegans nuclear lamin; lmn-1 is an essential gene that is required for a number of nuclear processes, including chromatin organization, cell cycle progression, chromosome segregation, and nuclear pore complex spacing; LMN-1 is also required for nuclear envelope localization of EMR-1/Emerin during early development; LMN-1 localizes to the nuclear periphery of all cell typ…
cel-miR-34-5p	WBGene00002266	lec-3	142	-20.24	none available
cel-miR-34-5p	WBGene00011279	asd-1	140	-15.23	asd-1 encodes an ortholog of human RBM9 et al., and paralog of FOX-1 and SPN-4; ASD-1 isoforms have an RNA recognition motif and 1-2 glutamine/asparagine-rich domains; ASD-1 and FOX-1 both bind a site in egl-15 mRNA that is required to repress exon 5B splicing into mature mRNA; ASD-1 alone is partly required for exon 5A expression in muscle cells, while FOX-1 alone is dispensable for it; double a…
cel-miR-34-5p	WBGene00004501	rpt-1	146	-23.6	rpt-1 encodes a predicted ATPase subunit of the 19S regulatory complex of the proteasome that affects fertility and embryonic viability.
cel-miR-34-5p	WBGene00018532	F47B7.1	151	-16.1	none available
cel-miR-228-5p	WBGene00017121	cyc-2.1	140	-10	cyc-2.1 encodes, along with cyc-2.2, one of two C. elegans cytochrome c proteins; the product of cyc-2.1 is predicted to function in the electron transport chain by transferring electrons from respiratory chain Complex III to Complex IV; large-scale RNAi screens indicate the cyc-2.1 activity is required for embryonic and larval development as well as for normal brood sizes and growth rates.
cel-miR-228-5p	WBGene00000465	cpg-1	160	-17.92	cpg-1 encodes, by alternative splicing, two isoforms of a chondroitin proteoglycan; CPG-1 contains three chitin-binding peritrophin-A domains and two mucin-like regions; CPG-1 is individually dispensable for normal embryonic development; however, CPG-1 and CPG-2 are jointly required for osmotic integrity of early embryos, error-free chromosomal segregation during meiosis, polar body extrusion, as…
cel-miR-228-5p	WBGene00001444	flp-1	143	-14.83	flp-1 can encode up to seven distinct, yet highly similar, FMRFamide-related peptides (FaRPs), small neuromodulatory peptides that are characterized by a C-terminal Arg-Phe-amide motif; in C. elegans, FLP-1 peptides are required for regulation of several behaviors, including well-coordinated, sinusoidal movement and the transition between active and inactive states of egg-laying; receptors for th…
cel-miR-228-5p	WBGene00006807	unc-75	168	-30.4	unc-75 encodes an RNA-binding protein with two N-terminal RNA recognition motifs (RRMs), a glutamine/asparagine-rich linker domain, and a third C-terminal RRM that is orthologous to the mammalian CELF/BrunoL proteins that control pre-mRNA splicing; UNC-75 is required for neuron-specific splicing of unc-32 mRNA; UNC-75 binds the unc-32 intron 7a in vitro; both UNC-75 and EXC-7 are required in para…
cel-miR-228-5p	WBGene00001393	fat-1	140	-13.91	fat-1 encodes an omega-3 fatty acyl desaturase that acts on substrates of 16-20 carbons with a preference for omega-6 fatty acids; FAT-1 dehydrogenates its substrates 3 carbons from the methyl terminus; FAT-1 is required in vivo for n3 polyunsaturated fatty acid (PUFA) synthesis; the fatty acids of fat-1(wa9) mutants consist of 20% arachidonic acid (20:4n6), instead of the 20% eicosapentaenoic ac…
cel-miR-228-5p	WBGene00022037	acs-13	150	-17.36	none available
cel-miR-228-5p	WBGene00010408	mboa-2	159	-18.01	mboa-2 encodes a sterol O-acyltransferase orthologous to Drosophila MIDWAY, and to human DGAT1 (OMIM:604900); MBOA-2 has acyl-CoA:diacylglycerol O-acyltransferase activity when expressed in yeast; MBOA-2 has no obvious function in mass RNAi assays.
cel-miR-228-5p	WBGene00022134	Y71G10AL.1	146	-14.28	none available
cel-miR-228-5p	WBGene00009342	fasn-1	151	-15.06	fasn-1 encodes a fatty acid synthase, orthologous to human FASN (OMIM:600212); CEP-1 is required for fully normal fasn-1 expression in vivo; CEP-1 drives transcription of luciferase reporters whose promoters contains either of two putative CEP-1 binding sites (FAS-T1 and FAS-T2) found in the fasn-1 gene, and this activity is partially lost by mutation of conserved CEP-1 residues (R298 or H310); i…
cel-miR-228-5p	WBGene00009142	F26A3.4	154	-19.96	none available
cel-miR-228-5p	WBGene00000113	alh-7	288	-30.99	alh-7 encodes an ortholog of the human gene DJ73M23.2 (NAD+-DEPENDENT SUCCINIC SEMIALDEHYDE DEHYDROGENASE; ALDH5A1), which when mutated leads to SSADH deficiency (OMIM:271980).
cel-miR-228-5p	WBGene00010427	hpo-11	140	-24.81	none available
cel-miR-228-5p	WBGene00022286	rga-4	164	-16.34	rga-4 encodes a GTPase-activating protein (GAP); RNAi experiments predicted to target rga-4 and the related rga-3 gene result in early embryonic defects, specifically defects in cortical contractility, non-muscle myosin NMY-2 distribution, and the relative size of PAR protein domains; in vitro, RGA-4 positively regulates RHO-1 GTPase activity, consistent with genetic studies showing that the rga-…
cel-miR-228-5p	WBGene00006769	unc-33	141	-18.95	unc-33 encodes a conserved member of the CRMP/TOAD/Ulip/DRP family of proteins that includes mammalian CRMP-2 (Collapsin response mediator protein-2), which is essential for axon guidance and axonogenesis; in C. elegans, unc-33 activity is required for several biological processes including outgrowth and guidance of sensory, motor, and interneurons, sex myoblast migration, normal body movement an…
cel-miR-228-5p	WBGene00001993	hpd-1	164	-21.13	hpd-1 encodes a putative 4-hydroxyphenylpyruvate dioxygenase required for normally short lifespan and for negative regulation of the dauer larval stage, with loss of hpd-1 function prolonging lifespan and promoting dauer formation; hpd-1 is a (perhaps evolutionarily conserved) target of transcriptional activation by DAF-16; HPD-1 is orthologous to human HPD (OMIM:609695, mutated in tyrosinemia ty…
cel-miR-228-5p	WBGene00015484	atgl-1	140	-14.34	none available
cel-miR-228-5p	WBGene00003834	nxf-1	143	-19.95	nxf-1 encodes a homolog of human TAP protein, a member of the NXF family of shuttling transport receptors for nuclear export of mRNA; binds RNA directly and its function has been shown to be conserved with the NXF family.
cel-miR-228-5p	WBGene00000617	col-40	160	-16.87	col-40 encodes a cuticle collagen protein that belongs to the col-6 cuticle collagen family; col-40 transcript is present in L1 larvae and at the L2d-dauer molt.
cel-miR-228-5p	WBGene00008218	nasp-2	148	-13.17	none available
cel-miR-228-5p	WBGene00013379	Y62E10A.13	155	-13.35	none available
cel-miR-228-5p	WBGene00010868	somi-1	152	-17	none available
cel-miR-228-5p	WBGene00006321	sup-12	149	-18	sup-12 encodes an RNA-binding protein that contains a conserved RNA recognition motif (RRM); during development, SUP-12 functions as a muscle-specific splicing factor to regulate alternative pre-mRNA processing of unc-60 and egl-15 transcripts; in vitro, SUP-12 can bind intronic regions of the unc-60 and egl-15 pre-mRNAs; specifically, SUP-12 binds the unc-60 intron 1A cooperatively with ASD-2, w…
cel-miR-228-5p	WBGene00006798	unc-64	146	-16.2	unc-64 encodes syntaxin, a plasma membrane receptor for intracellular vesicles that is orthologous to vertebrate syntaxin 1A (OMIM:186590) and Drosophila Syx1A; UNC-64 is required for normal locomotion and possibly also for insulin secretion; as an essential component of the core synaptic vesicle fusion machinery, UNC-64 interacts with UNC-13, a diacylglycerol-binding protein, and SNB-1/synaptobr…
cel-miR-228-5p	WBGene00001330	eps-8	145	-17.67	eps-8 is encodes a cell signaling adaptor protein that contains and N-terminal PTB domain, and C-terminal SH3 and actin-binding domains; EPS-8 is essential for epidermal and intestinal cells morphogenesis; eps-8 is also involved in trafficking of the LET-23 EGF receptor during vulval development; EPS-8 physically interacts with the ankyrin repeat protein VAB-19 and demonstrates a novel actin barb…
cel-miR-228-5p	WBGene00015301	C01F1.6	149	-12.11	none available
cel-miR-228-5p	WBGene00004749	sdn-1	141	-14.58	sdn-1 encodes a homolog of vertebrate syndecan-2, a type I transmembrane heparan sulfate proteoglycan; by homology, SDN-1 is predicted to play a role in cell-cell and cell-matrix adhesion; loss of sdn-1 activity via RNA-mediated interference (RNAi) indicates that SDN-1 is required for backward locomotion and for normal development of the egg-laying system, particularly gonadal and vulval structur…
cel-miR-228-5p	WBGene00000846	cup-5	152	-20.08	The cup-5 gene encodes an ortholog of the human mucolipin 1 gene; cup-5 is required for viability, endo-lysosomal transport and the normal degradation of lysosomes; cup-5 mutants also show increased cell death, which might be a secondary consequence of lysosomal dysfunction; the inactivation of mrp-4 which is a ABCC transporter rescues most of the defects in cup-5 mutants, suggesting that the acc…
cel-miR-228-5p	WBGene00009374	F34D10.4	146	-13.42	none available
cel-miR-228-5p	WBGene00007317	C05A9.2	145	-12.63	none available
cel-miR-228-5p	WBGene00000894	dab-1	152	-14.53	dab-1 encodes an ortholog of the cytoplasmic adaptor protein DISABLED, required for normal molting and meiotic arrest; DAB-1 is also required for EGL-17 secretion from vulval cells, and thus indirectly for normal sex myoblast (SM) migration and egg-laying; DAB-1 contains a conserved PTB domain and signals that confer localization to Golgi-proximal vesicles, and DAB-1 localizes to vesicular struct…
cel-let-7-5p	WBGene00006930	vit-6	145	-12.02	vit-6 encodes a vitellogenin precursor protein that is cleaved in the body cavity into two smaller yolk proteins, YP115 and YP88; in C. elegans, vitellogenin genes exhibit stage-, sex-, and tissue-specific expression being expressed exclusively in the adult hermaphrodite intestine.
cel-let-7-5p	WBGene00000776	cpl-1	144	-20.17	cpl-1 encodes a member of the cathepsin L-like cysteine protease family required for embryonic viability and normal growth; expressed in eggshells and throughout early embryos, accumulates in intestinal cells during late embryogenesis, and expressed in the cuticle, gonad, and pharynx later in development.
cel-let-7-5p	WBGene00003963	pdi-2	144	-17.15	pdi-2 encodes a protein disulfide isomerase beta subunit; by homology, PDI-2 is predicted to function in oxidative protein folding in the endoplasmic reticulum (ER); PDI-2 activity is required for several organismal processes including body morphology, locomotion, fertility, molting, and collagen deposition; pdi-2 transcript levels are increased in response to ER stress; pdi-2 is expressed in the…
cel-let-7-5p	WBGene00000170	aqp-2	147	-16.97	aqp-2 encodes, by alternative splicing, two isoforms of an biochemically atypical aquaglyceroporin; when expressed in Xenopus oocytes, AQP-2 increases water permeability 5- to 11-fold, and urea permeability 4.5-fold, but has no effect on glycerol permeability; AQP-2::GFP fusion proteins are expressed predominantly in the excretory cell and more weakly in muscle, motor neurons, and hypodermis; AQP…
cel-let-7-5p	WBGene00011561	ttr-15	140	-13.73	none available
cel-let-7-5p	WBGene00019947	htz-1	140	-17.89	htz-1 encodes the C. elegans ortholog of the H2A.Z histone variant; htz-1 is an essential gene and during development, HTZ-1 functions with the PHA-4/FoxA transcription factor and the MYS-1/TIP60-SSL-1/SWR1 remodeling complex to regulate gene expression during pharyngeal (foregut) organogenesis; a YFP::HTZ-1 fusion protein localizes to pharyngeal gene promoters at the onset of transcription, in a…
cel-let-7-5p	WBGene00000479	cgh-1	146	-17.52	cgh-1 encodes a putative DEAD-box RNA helicase, orthologous to budding yeast Dhh1p, fission yeast Ste13p, Drosophila ME31B, and human DDX6 (OMIM:600326); CGH-1 inhibits physiological apoptosis in oocytes, keeping it down to a normal level of ~50% in hermaphrodite gonads; independently of apoptosis, CGH-1 is also required for sperm function, oocyte fertilization, and early embryonic cytokinesis; b…
cel-let-7-5p	WBGene00022235	sqd-1	140	-13.8	none available
cel-let-7-5p	WBGene00000149	apl-1	146	-15.45	apl-1 encodes two almost identical isoforms orthologous to human Amyloid precursor protein (APP); although native APL-1 is predicted to be membrane-bound until proteolytically cleaved, neuronal expression of a partial N-terminal extracellular region of APL-1 alone, containing either the E1 or the E2 domain, is sufficient for APL-1"s normal functions in vivo (molting and morphogenesis, pharyngeal …
cel-let-7-5p	WBGene00016739	pitr-1	144	-16.62	none available
cel-let-7-5p	WBGene00003559	ncl-1	150	-14.23	ncl-1 encodes a cytoplasmic B-box zinc finger protein that negatively regulates rRNA and 5S RNA transcription, nucleolus size, and body size; NCL-1 is orthologous to Drosophila BRAIN TUMOR (BRAT), and ncl-1 mutants can be rescued by brat transgenes; NCL-1 is required for the normally small size of neuronal, muscle, and hypodermal nucleoli, and is already active in 4-cell embryos; NCL-1 may be a r…
cel-let-7-5p	WBGene00000912	daf-16	442	-44.71	daf-16 encodes the sole C. elegans forkhead box O (FOXO) homologue; DAF-16 functions as a transcription factor that acts in the insulin/IGF-1-mediated signaling (IIS) pathway that regulates dauer formation, longevity, fat metabolism, stress response, and innate immunity; DAF-16 regulates these various processes through isoform-specific expression, isoform-specific regulation by different AKT kina…
cel-let-7-5p	WBGene00000277	cab-1	141	-13.56	Novel protein which has a C-terminal motif weakly homologous to mouse NPDC-1 and is involved in synaptic regulation; it is expressed in various neurons including ventral cord and tail ganglion neurons; it physically interacts with AEX-3, which is a guanine nucleotide exchange factor for the Rab3 GTPase.
cel-let-7-5p	WBGene00010681	mak-1	144	-16.54	none available
cel-let-7-5p	WBGene00000472	cey-1	140	-13.48	cey-1 encodes a protein with a cold-shock/Y-box domain that is expressed in early embryonic blastomeres (at the 15-cell stage, i.e., pre-gastrulation), but is normally repressed in early germline blastomeres by PIE-1.
cel-let-7-5p	WBGene00007058	dmd-6	150	-18.71	none available
cel-let-7-5p	WBGene00009772	ztf-7	152	-16.32	none available
cel-let-7-5p	WBGene00006942	wrk-1	157	-15.82	wrk-1 encodes, by alternative splicing, at least three isoforms of a GPI-anchored immunoglobulin superfamily (IgSF) protein orthologous to Drosophila KLINGON, WRAPPER, CG7166, and CG13506; WRK-1 is expressed in the pioneering embryonic motoneurons (eMNs) DA, DB, and DD; WRK-1 expression in DA, DB, and DD is necessary and sufficient to prevent follower axons from inappropriately crossing the ventr…
cel-let-7-5p	WBGene00003687	nhr-97	144	-11.42	none available
cel-let-7-5p	WBGene00000036	ace-2	140	-17.65	An acetylcholineesterase involved in the termination of cholinergic nerve transmission; it is predominantly expressed in motoneurons.
cel-let-7-5p	WBGene00000390	cdc-42	140	-15.25	cdc-42 encodes a RHO GTPase; cdc-42 controls polarity of both individual cells and developing embryos by regulating the localization of PAR proteins; cdc-42 is also required for regulation of receptor-mediated endocytosis; CDC-42 is widely expressed and localizes to a number of different locations, including the cell cortex, centrosomes, recycling endosomes, and at the time of hypodermal cell fus…
cel-let-7-5p	WBGene00003003	lin-14	739	-87.6	lin-14 encodes a novel protein whose activity is required for specifying the division timings of a specific group of cells during postembryonic development; lin-14 loss-of-function mutations result in the premature appearance of later larval lineages, while gain-of-function mutations result in reiteration of L1 larval stages lineages; in addition, lin-14 acts as a positive regulator of AVM, PVM, …
cel-let-7-5p	WBGene00001178	egl-9	148	-21.77	egl-9 encodes a proline hydroxylase; EGL-9 functions in a conserved hypoxia-sensing pathway to negatively regulate HIF-1 (hypoxia inducible factor) by hydroxylating prolyl HIF-1 residues; EGL-9 activity is negatively regulated by its physical association with CYSL-1, a protein with similarity to cysteine synthases that acts to transduce information about the environmental O2 levels through H2S (h…
cel-let-7-5p	WBGene00016115	mdt-26	150	-16.93	none available
cel-let-7-5p	WBGene00010041	F54C9.3	142	-11.48	none available
cel-let-7-5p	WBGene00012435	flh-1	158	-14.64	none available
cel-let-7-5p	WBGene00006833	unc-108	149	-16.63	unc-108 encodes a small GTPase homologous to the Rab GTPases that function in endocytosis, membrane fusion, and vesicular trafficking events; unc-108 function is required in neurons for normal locomotion; unc-108 also functions in the removal of apoptotic cells, specifically it functions in engulfing cells for the recruitment and fusion of the lysosome to the phagosome; unc-108 is expressed in ne…
cel-let-7-5p	WBGene00001595	gld-1	163	-20.61	gld-1 encodes a protein containing a K homology (KH) RNA binding domain; GLD-1 is required for regulation of the mitosis/meiosis decision during germline development (promotion of meiotic entry) in parallel with gld-2, gld-3, and nos-3 and also affects spermatogenesis; GLD-1 physically interacts with the 3"- and 5"UTR of its putative mRNA targets in vitro to negatively regulate their translation;…
cel-let-7-5p	WBGene00004984	spn-4	144	-14.87	spn-4 encodes a protein containing an RNP-type RNA-binding domain; SPN-4 is required for rotation, but not polarization, of the mitotic spindle in the P1 blastomere of the two-cell stage embryo; SPN-4 is also required for mesectoderm and mesendoderm formation in conjunction with proper localization of maternal cell-fate determinants such as SKN-1; in addition, SPN-4 binds the glp-1 3" UTR and is …
cel-let-7-5p	WBGene00008764	dylt-1	142	-18.81	dylt-1 encodes a putative dynein light chain subunit that inhibits DHC-1 in vivo, but is otherwise dispensable for viability; DYLT-1 is paralogous to DYLT-3, and orthologous to human DYNLT1 and DYNLT3 (OMIM: 300302); dylt-1(RNAi) and dylt-1(ok417) both suppress the lethality of conditional dhc-1 mutations, and dylt-1(RNAi) suppresses dhc-1(or195) spindle length and cytokinesis defects as well, in…
cel-let-7-5p	WBGene00017814	F26A10.2	289	-32.1	F26A10.2 encodes a protein with four zinc-finger domains and a glutamine/asparagine-rich domain, that is required for maintenance of the germline and for locomotion; F26A10.2(RNAi) animals are uncoordinated and have sterile progeny.
cel-let-7-5p	WBGene00016162	crh-2	144	-14.31	none available
cel-let-7-5p	WBGene00004075	pod-1	140	-19.46	The pod-1 gene encodes a coronin-like protein required for asymmetry along the anterior-posterior axis at the beginning of embryonic development.
cel-let-7-5p	WBGene00018285	smk-1	144	-14.56	smk-1 encodes a novel, evolutionarily conserved protein that is orthologous to the mammalian and Dictyostelium discoideum SMEK (suppressor of MEK null) proteins; smk-1 activity is essential for several aspects of DAF-16-mediated longevity namely, the defense response to pathogenic bacteria and increased resistance to oxidative and UV-induced damage; in regulating DAF-16 activity, SMK-1 appears to…
cel-let-7-5p	WBGene00000496	chs-1	143	-17.87	chs-1 encodes a chitin synthase, paralogous to CHS-2; chs-1 is required for embryonic chitin synthesis, eggshell synthesis and osmotic integrity, error-free chromosomal segregation during meiosis, polar body extrusion, association of the sperm pronucleus/centrosome complex (SPCC) with the early embryonic cortex, localization of PAR-2 in early embryos, posterior localization of P granules or PIE-1…
cel-let-7-5p	WBGene00021009	afd-1	140	-18.87	none available
cel-let-7-5p	WBGene00015061	cpna-2	146	-19.04	cpna-2 encodes proteins with similarity to several InterPro domains including those of polycystin cation channels, von Willebrand factor, the DNA recombination repair protein BRCA2, protein-tyrosine phosphatase, non-receptor type-13, glyoxylate carboligase, and copines, Ca2+-dependent phosphatidylserine binding proteins; cpna-2::gfp reporter fusions are expressed in body wall muscle.
cel-let-7-5p	WBGene00002053	ifb-1	147	-15.88	ifb-1 (also known as vab-21) encodes two isoforms of an essential intermediate filament protein that is coexpressed with the essential IF proteins IFA-1, IFA-2, and IFA-3, along with IFA-4; IFB-1 is required for embryonic development and epidermal morphogenesis; IFB-1 forms heteropolymeric intermediate filaments in vitro with an equimolar mixture of IFA-1, IFA-2, or IFA-3, and binds IFA-4 in blot…
cel-let-7-5p	WBGene00002203	kin-20	143	-18.11	none available
cel-let-7-5p	WBGene00008121	C46F11.6	147	-15.76	none available
cel-let-7-5p	WBGene00010700	nipi-3	155	-19.36	nipi-3 encodes a kinase similar to the human kinase Tribbles homolog 1; nipi-3 functions in the innate immune response, likely upstream of the SEK-1 MAPKK, to upregulate expression of NLP-29, an antimicrobial peptide, in response to fungal infection.
cel-let-7-5p	WBGene00022447	hpo-20	163	-15.38	none available
cel-let-7-5p	WBGene00019883	met-2	145	-17.49	met-2 encodes a histone methyltransferase similar to human SETDB1; during development, met-2 acts as a class B synMuv gene: loss of met-2 activity in the background of a class A or class C synMuv mutant, such as lin-15A or trr-1, respectively, results in a multivulval phenotype, indicating that met-2 acts to negatively regulate vulval cell fate specification; as met-2 is required for normal level…
cel-let-7-5p	WBGene00015301	C01F1.6	147	-15.52	none available
cel-let-7-5p	WBGene00002979	lfe-2	154	-14.84	lfe-2 encodes an inositol (1,4,5) triphosphate-3-kinase (IP3K); lfe-2 activity is required for normal levels of hermaphrodite fertility and for tissue-specific negative regulation of the LET-23 signaling pathway that controls spermathecal dilation and ovulation; in vitro, LFE-2 can exhibit catalytic activity, converting IP3 to IP4; an lfe-2::GFP transcriptional fusion is expressed in the adult sp…
cel-let-7-5p	WBGene00001650	gon-1	143	-14.57	gon-1 encodes a functional metalloprotease that defines a new sub-family of secreted proteases known as MPT (metalloprotease with thrombospondin type 1 repeats); the other two members of this family are the bovine procollagen I N-protease ( PINP ) and the murine enzyme ADAMTS-1; gon-1 is essential for hermaphrodite gonadal morphogenesis and sequence homology with other metalloproteases suggests t…
cel-let-7-5p	WBGene00017699	flcn-1	143	-16.24	F22D3.2 encodes an ortholog of human folliculin (OMIM:607273, mutated in Birt-Hogg-Dube syndrome).
cel-let-7-5p	WBGene00001510	fzr-1	143	-13.05	fzr-1 encodes a WD repeat-containing protein homologous to Cdh1/Hct1/FZR (OMIM:603619), a regulatory subunit of the anaphase-promoting complex/cyclosome (APC/C) required for anaphase initiation and exit from mitosis; FZR-1 is required for fertility, and also functions redundantly with lin-35/Rb to for normal embryogensis and control of postembryonic cell proliferation; FZR-1 probably regulates th…
cel-let-7-5p	WBGene00011662	T09F3.2	151	-18.33	none available
cel-let-7-5p	WBGene00006975	zfp-1	141	-16.1	zfp-1 encodes a leucine zipper, zinc finger, and PHD/LAP domain (plant homeodomain/leukemia-associated protein)-containing protein homologous to human AF10 (OMIM:602409, which is involved in chromosomal translocations associated with acute leukemia); loss of zfp-1 activity via RNA-mediated interference (RNAi) results in suppression of RNAi, suggesting that ZFP-1 plays a role in gene silencing; ba…
cel-let-7-5p	WBGene00002036	hum-2	142	-13.45	hum-2 encodes a class V unconventional myosin similar to human MYO5A, MYO5B and MYO5C.
cel-miR-80-3p	WBGene00002005	hsp-1	143	-13.73	hsp-1 encodes hsp70A, a member of the heat shock family of proteins; hsp70A is closely related to the Drosophila heat inducible hsp70s and the S. cerevisiae SSA hsp70 subfamily; the hsp-1 gene is normally expressed throughout development and upon heat-shock the hsp-1 mRNA is enhanced 2-6 fold; down-regulation of hsp-1 via RNA interference results in a small reduction in the life-span of an age-1 …
cel-miR-80-3p	WBGene00006781	unc-45	142	-16.63	unc-45 encodes a conserved, muscle-specific protein that contains an N-terminal TRP (tetratricopeptide repeat) and a C-terminal UCS (UNC-45-CRO1-She4p) domain; during body wall muscle development, UNC-45 activity is essential for proper thick filament formation and sarcomere organization; in addition, maternally provided UNC-45 is required for embryonic polarity, cytokinesis, and germline cellula…
cel-miR-80-3p	WBGene00004916	snr-3	152	-10.72	snr-3 encodes an ortholog of human small nuclear ribonucleoprotein Sm D1, a protein that forms part of a heptameric complex required for biogenesis and function of the snRNPs that catalyze mRNA splicing; in combination with the gene that encodes the human Sm D2 ortholog (snr-4), snr-3 affects embryonic viability and nuclear association and localization of P granules in embryos, based on an RNAi a…
cel-miR-80-3p	WBGene00011156	R09B3.3	161	-18.84	none available
cel-miR-80-3p	WBGene00003934	pat-10	141	-15.98	pat-10 encodes body wall muscle troponin C, the calcium-binding component of the troponin complex of actin thin filaments; PAT-10 is essential for muscle contraction and thus for completion of embryonic morphogenesis and elongation; by homology, PAT-10 likely functions to regulate body wall muscle contraction in response to changes in intracellular calcium; PAT-10 is expressed in body wall muscle…
cel-miR-80-3p	WBGene00001426	fkb-1	151	-12.63	fkb-1 encodes a homolog of mouse FK506-binding protein 2.
cel-miR-80-3p	WBGene00000273	brp-1	140	-15.48	brp-1 encodes a glutamine-rich protein that is conserved in nematodes, but that has no known homologies or sequence motifs; BRP-1 is able to bypass the need for the S. cerevisiae mating pheromone MAP kinase cascade to activate the mating pheromone-responsive gene FUSl.
cel-miR-80-3p	WBGene00001684	gpd-2	143	-16.62	gpd-2 encodes one of four C. elegans glyceraldehyde-3-phosphate dehydrogenases (GAPDHs); by homology, GPD-2 is predicted to reversibly catalyze the oxidation and phosphorylation of glyceraldehyde-3-phosphate to 1,3-diphosphoglycerate during glycolysis; in C. elegans, GPD-2 and GPD-3 constitute the major GAPDH isoenzymes and are expressed at highest levels during postembryonic development, primari…
cel-miR-80-3p	WBGene00011869	dod-6	143	-13.92	none available
cel-miR-80-3p	WBGene00003090	lys-1	153	-11.43	lys-1 encodes a putative lysozyme, whose overexpression increases resistance to infection by Serratia marcescens; lys-1(RNAi) animals have normal resistance to S. marcescens, perhaps because of genetic redundancy with the LYS-1 paralogs LYS-2 to -8 and LYS-10; in uninfected animals, LYS-1 is expressed in the intestine and in IL1/IL2 neurons, along with a few unidentified head neurons; in intestin…
cel-miR-80-3p	WBGene00003511	mxl-3	147	-13.36	mxl-3 encodes a basic helix-loop-helix transcription factor; an mxl-3 deletion mutation, tm2580, has been reported to exhibit a slight growth delay; in vitro, MXL-3 binds E-box and/or E-box-like sequences; an mxl-3 reporter fusion is expressed in larvae and adults and seen in head muscles and neurons, part of the intestine, and body hypodermis.
cel-miR-80-3p	WBGene00000479	cgh-1	166	-21.24	cgh-1 encodes a putative DEAD-box RNA helicase, orthologous to budding yeast Dhh1p, fission yeast Ste13p, Drosophila ME31B, and human DDX6 (OMIM:600326); CGH-1 inhibits physiological apoptosis in oocytes, keeping it down to a normal level of ~50% in hermaphrodite gonads; independently of apoptosis, CGH-1 is also required for sperm function, oocyte fertilization, and early embryonic cytokinesis; b…
cel-miR-80-3p	WBGene00009141	ncbp-2	169	-21.56	ncbp-2 encodes the C. elegans ortholog of the CBP20 subunit of the nuclear cap binding complex; by homology, NCBP-2 is predicted to play a role in mRNA decay; loss of ncbp-2 activity via RNAi indicates that this gene is essential for embryonic and larval development and in addition, plays a role in reproduction and vulval morphogenesis; staining of C. elegans embryos with an antibody to human CBP…
cel-miR-80-3p	WBGene00003915	pan-1	144	-10.76	pan-1 encodes a novel predicted transmembrane protein with extracellular leucine-rich repeats; loss of PAN-1 activity via RNAi results in molting defects and arrested L2-sized larvae, indicating that PAN-1 is required for completion of the larval molts; pan-1 expression is enriched in the germline and upregulated in animals mutant for unc-95, which encodes a LIM domain-containing protein that loc…
cel-miR-80-3p	WBGene00022048	fln-1	164	-19.9	fln-1 encodes three protein isoforms, a full length filamin (fln-1a) orthologous to human filamin A, alpha (FLNA; OMIM:300017), of 2257 amino acids containing a well conserved N-terminal ABD and 20 Ig-like repeats and two trans-sliced versions with C- and N- terminal truncations are 1084 and 836 amino-acids respectively; expression of full-length filamin in hermaphrodites is required for normal b…
cel-miR-80-3p	WBGene00003559	ncl-1	144	-10.82	ncl-1 encodes a cytoplasmic B-box zinc finger protein that negatively regulates rRNA and 5S RNA transcription, nucleolus size, and body size; NCL-1 is orthologous to Drosophila BRAIN TUMOR (BRAT), and ncl-1 mutants can be rescued by brat transgenes; NCL-1 is required for the normally small size of neuronal, muscle, and hypodermal nucleoli, and is already active in 4-cell embryos; NCL-1 may be a r…
cel-miR-80-3p	WBGene00044134	D1025.10	141	-16.87	none available
cel-miR-80-3p	WBGene00000912	daf-16	146	-12.3	daf-16 encodes the sole C. elegans forkhead box O (FOXO) homologue; DAF-16 functions as a transcription factor that acts in the insulin/IGF-1-mediated signaling (IIS) pathway that regulates dauer formation, longevity, fat metabolism, stress response, and innate immunity; DAF-16 regulates these various processes through isoform-specific expression, isoform-specific regulation by different AKT kina…
cel-miR-80-3p	WBGene00018152	acs-4	144	-9.54	none available
cel-miR-80-3p	WBGene00022037	acs-13	144	-13.09	none available
cel-miR-80-3p	WBGene00016509	adss-1	151	-18.76	none available
cel-miR-80-3p	WBGene00000552	cmd-1	148	-16.83	cmd-1 encodes a putative homolog of calmodulin 1 that affects growth rate and fertility.
cel-miR-80-3p	WBGene00010351	cbd-1	146	-13.43	cbd-1 encodes a large (1319-residue) protein with 12 chitin-binding peritrophin-A domains; cbd-1(RNAi) animals have an osmotically-sensitive embryonic lethal phenotype, perhaps because of defects in chitin and eggshell synthesis; like CEJ-1 and CPG-2, CBD-1 may participate in eggshell synthesis and early embryonic development; CBD-1"s multiple peritrophin-A domains might enable mechanical cross-l…
cel-miR-80-3p	WBGene00001038	dnj-20	293	-24.79	none available
cel-miR-80-3p	WBGene00010178	yif-1	151	-16.8	none available
cel-miR-80-3p	WBGene00004208	ptc-1	156	-14.67	ptc-1 encodes an ortholog of Drosophila PATCHED (PTC) and human PTCH which defines one of seven paralogous families of sterol sensing domain (SSD) proteins; PTC-1 is required for cytokinesis in the germline, but not in somatic cells (the converse of PTR-2"s function, and a role conserved in C. briggsae); PTC-1 is also required to isolate meiotic germline nuclei from one another so that their nucl…
cel-miR-80-3p	WBGene00021248	Y22D7AL.10	148	-14.8	none available
cel-miR-80-3p	WBGene00000793	crh-1	140	-12.18	crh-1 encodes a homolog of the cyclic AMP-response element binding protein (CREB); crh-1 is involved in the transcription of CRE-sequence dependant genes activated by a CaM kinase cascade; crh-1 is required in the bilateral thermosensory neuron AFD, for a memory-related behaviour and for response to tap (nonlocalized mechanosensory stimulation) and tap habituation; crh-1 appears to be ubiquitousl…
cel-miR-80-3p	WBGene00010038	rheb-1	146	-10.75	rheb-1 encodes a GTPase orthologous to the mammalian Rheb and Rheb1 GTPases; by homology, RHEB-1 is predicted to function as a regulator of LET_363/TOR function; in C. elegans, rheb-1 plays an essential role in mediating intermittent fasting (IF)-induced longevity; further, loss of rheb-1 activity via RNAi indicates that rheb-1 is involved in the mitochondrial unfolded protein response and that i…
cel-miR-80-3p	WBGene00006739	ulp-4	145	-13.72	none available
cel-miR-80-3p	WBGene00020097	larp-1	140	-12.32	larp-1 encodes an La-related protein containing an La RNA-binding motif and a conserved LARP1 domain; loss of larp-1 activity results in defective oogenesis, which is suppressed by loss of function mutations in Ras-MAPK signaling components, suggesting that in the germline, LARP-1 functions to negatively regulate Ras-MAPK pathway activity; as LARP-1 binds RNA homopolymers in vitro and larp-1 muta…
cel-miR-80-3p	WBGene00001452	flp-9	152	-16.53	flp-9 encodes a predicted FMRFamide-like peptide neurotransmitter that inhibits action potentials in the pharyngeal muscle when applied to the pharynx of dissected worms and inhibits movement when injected into A. suum; expressed at highest levels prior to adulthood.
cel-miR-80-3p	WBGene00016781	C49G7.3	143	-10.38	none available
cel-miR-80-3p	WBGene00077761	zip-9	142	-14	none available
cel-miR-80-3p	WBGene00006331	sup-26	147	-11.41	sup-26 encodes an RRM domain-containing protein; SUP-26 functions in somatic sex determination via negative regulation of tra-2 translation; SUP-26 binds the tra-2 28-nucleotide repeat element known as the TRA-2/GLI element (TGE), which is located in tra-2 3";untranslated region (UTR); SUP-26 physically interacts with the poly(A)-binding protein PAB-1, suggesting that it may control tra-2 transla…
cel-miR-80-3p	WBGene00006888	vbh-1	165	-15.06	vbh-1 encodes a DEAD-box RNA helicase with similarity to Drosophila Vasa and Belle; vbh-1 activity is required for the proper timing of the sperm-oocyte switch during germ line development; vbh-1 also plays a role in embryonic development; in regulating germ line development, vbh-1 appears to function at least partially redundantly with laf-1, which also encodes a DEAD-box RNA helicase; VBH-1 is …
cel-miR-80-3p	WBGene00003955	pcn-1	158	-15.5	pcn-1 encodes the C. elegans ortholog of proliferating cell nuclear antigen (PCNA), an acidic protein that is an essential component of the DNA replication and repair machinery and serves as a processivity factor for DNA polymerase delta; PCN-1 is required for early embryogenesis and for proper germ-line development, and directly interacts with CKI-2, a cyclin-dependent kinase inhibitor homolog t…
cel-miR-80-3p	WBGene00012894	tbc-17	143	-11.73	none available
cel-miR-80-3p	WBGene00006391	taf-9	157	-13.18	none available
cel-miR-80-3p	WBGene00019465	acl-14	151	-14.8	none available
cel-miR-80-3p	WBGene00003003	lin-14	149	-13.8	lin-14 encodes a novel protein whose activity is required for specifying the division timings of a specific group of cells during postembryonic development; lin-14 loss-of-function mutations result in the premature appearance of later larval lineages, while gain-of-function mutations result in reiteration of L1 larval stages lineages; in addition, lin-14 acts as a positive regulator of AVM, PVM, …
cel-miR-80-3p	WBGene00002048	ida-1	142	-12.2	ida-1 encodes a protein tyrosine phosphatase-like receptor, orthologous to the mammalian type I diabetes autoantigens IA-2 and phogrin that are expressed in dense core vesicles of neuroendocrine tissue and involved in regulated protein secretion; in C. elegans, IDA-1 appears to be required for regulating presynaptic neurotransmission and in particular, for the neuropeptidergic control of egg-layi…
cel-miR-80-3p	WBGene00016115	mdt-26	159	-17.09	none available
cel-miR-80-3p	WBGene00001196	egl-30	141	-11.72	egl-30 encodes an ortholog of the heterotrimeric G protein alpha subunit Gq (Gq/G11 class) that affects viability, locomotion, egg laying, synaptic transmission, and pharyngeal pumping; it genetically interacts with the goa-1 pathway, and is probably expressed ubiquitously, with highest expression in excitable cells.
cel-miR-80-3p	WBGene00017663	F21D12.3	144	-16.97	none available
cel-miR-80-3p	WBGene00010259	ric-7	145	-12.48	none available
cel-miR-80-3p	WBGene00008224	C50B8.1	145	-11.5	none available
cel-miR-80-3p	WBGene00007030	epc-1	145	-13.31	none available
cel-miR-80-3p	WBGene00006803	unc-70	151	-16.75	unc-70 encodes two isoforms of a beta-spectrin ortholog required for normal body curvature and shape, normal movement, and correct localization of the alpha-spectrin SPC-1; the predominant UNC-70 isoform is expressed in all embryonic cells except the intestine, at the plasma membrane at sites of intercellular contact; UNC-70 becomes largely restricted to muscles and neurons from hatching to adult…
cel-miR-80-3p	WBGene00001562	lin-66	142	-15.22	lin-66 encodes an unfamiliar protein, with visible homologs only in nematodes, that was identified in screens for molecules that interact with GEX-3, a homolog of mammalian protein ligands of the small GTPase Rac1, that is essential for ventral enclosure during embryonic development; LIN-66 is expressed in body wall and vulval muscles, and is also detected in the intestine, neurons, and probably …
cel-miR-80-3p	WBGene00004175	pqn-96	141	-12.56	The protein product of this gene is predicted to contain a glutamine/asparagine (Q/N)-rich ("prion") domain, by the algorithm of Michelitsch and Weissman (as of the WS77 release of WormBase, i.e., in wormpep77).
cel-miR-80-3p	WBGene00012182	osta-3	320	-25.78	none available
cel-miR-80-3p	WBGene00019971	ergo-1	147	-15.21	ergo-1 encodes an Argonaute protein; ERGO-1 is required for somatic gene regulation via the production or stabilization of endogenous (endo)-siRNAs, specifically the initial class of endo-siRNAs which are 26-nt, 5"-monophosphorylated, 5"-G-enriched antisense siRNAs; ERGO-1 activity is also required for the subcellular redistribution of the NRDE-3 Argonaute protein which, upon binding secondary si…
cel-miR-80-3p	WBGene00004914	snr-1	150	-12.15	snr-1 encodes an ortholog of human small nuclear ribonucleoprotein Sm D3, a protein that forms part of a heptameric complex required for the biogenesis and function of the snRNPs that catalyze mRNA splicing; in combination with the gene that encodes the human Sm B ortholog (snr-2) snr-1 affects embryonic viability and the nuclear association and localization of P granules in embryos based on an R…
cel-miR-80-3p	WBGene00019628	pup-2	140	-16.16	pup-2 encodes a template-independent poly(U) polymerase with 3"" end RNA substrates, orthologous to human ZCCHC6 and ZCCHC11, and paralogous to CID-1; like its paralog CID-1, PUP-2 is required for normally rapid growth and normally short lifespan; pup-2(RNAi) animals are slow-growing and abnormally long-lived; PUP-2 is paralogous to the GLD-2 family of poly(A) polymerases.
cel-miR-80-3p	WBGene00006369	sym-4	146	-14.59	sym-4 encodes a large (1,043-residue) protein that is required for viability in a mec-8 mutant background, and is also required by itself for normally rapid growth and locomotion; SYM-4 is orthologous to human WDR44, and has a nondescript N-terminal domain, with a C-terminal domain containing seven WD repeats; SYM-4 is broadly expressed, in larval and adult pharynx, digestive tract, neurons, vulv…
cel-miR-80-3p	WBGene00009691	F44E5.4	147	-11.55	F44E5.4 encodes a member of the Hsp70 family of heat shock proteins; as loss of F44E5.4 activity via large-scale RNAi screens results in no obvious defects, the precise role of F44E5.4 in C. elegans development and/or behavior is not yet known.
cel-miR-80-3p	WBGene00002000	hrp-2	156	-21.01	none available
cel-miR-80-3p	WBGene00019001	ipgm-1	148	-14.8	ipgm-1 encodes an experimentally confirmed cofactor-independent phosphoglycerate mutase that is essential for embryonic and larval viability, and for normal body morphology; paradoxically, ipgm-1 is also required for normally short lifespan (in mass RNAi screens for Age phenotypes); IPGM-1 exhibits phosphoglycerate mutase activity when expressed in vitro; ipgm-1 is expressed widely in larvae and …
cel-miR-80-3p	WBGene00000283	cah-5	150	-11.8	cah-5 encodes a member of the carbonic anhydrase family.
cel-miR-80-3p	WBGene00001441	fkh-9	151	-14.43	fkh-9 encodes a member of the forkhead domain transcription factor family.
cel-miR-80-3p	WBGene00011034	paxt-1	141	-13.07	none available
cel-miR-80-3p	WBGene00012559	epg-3	147	-13.96	none available
cel-miR-80-3p	WBGene00017814	F26A10.2	300	-32.8	F26A10.2 encodes a protein with four zinc-finger domains and a glutamine/asparagine-rich domain, that is required for maintenance of the germline and for locomotion; F26A10.2(RNAi) animals are uncoordinated and have sterile progeny.
cel-miR-80-3p	WBGene00002073	ima-2	154	-14.34	ima-2 encodes one of three C. elegans importin alpha proteins; IMA-2 is predicted to function as an adaptor protein that regulates import of nuclear proteins; during development, ima-2 activity is required for normal germline and embryonic mitoses, specifically for proper chromosome segregration and nuclear reassembly; IMA-2 expression is detected in germ cells, oocytes, and early embryonic cells…
cel-miR-80-3p	WBGene00002348	myo-1	146	-12.88	none available
cel-miR-80-3p	WBGene00001456	flp-13	141	-12.05	none available
cel-miR-80-3p	WBGene00004706	rsr-1	147	-13.17	rsr-1 encodes the C. elegans homolog of the SRm160 (serine/arginine-repeat related nuclear matrix protein of 160kDa) splicing coactivator; rsr-1 is an essential gene that is required for development, including normal pharyngeal morphology.
cel-miR-80-3p	WBGene00016716	acs-17	146	-15.04	none available
cel-miR-80-3p	WBGene00006830	unc-103	169	-25.02	unc-103 encodes an ether-a-go-go-related (ERG) K+ channel homolog, orthologous to human KCNH6 (OMIM:608168); UNC-103 regulates muscle activation in motility, egg-laying and male spicule protraction; UNC-103 is expressed highly in many neurons; gain-of-function unc-103 alleles can be uncoordinated, while loss-of-function alleles have a more subtle defect in copulatory spicule protraction.
cel-miR-80-3p	WBGene00002915	let-805	146	-18.62	let-805 encodes myotactin, a novel single-transmembrane protein containing extracellular fibronectin repeats; genetic analyses indicate that LET-805 is essential for proper association between hypodermal fibrous organelles and the contractile apparatus of muscle cells; LET-805 is expressed in hypodermal cells and in the pharynx and localizes to basolateral membranes.
cel-miR-80-3p	WBGene00001258	emb-4	148	-13.14	emb-4 (also known as mal-2 or sel-6) encodes a nuclear protein orthologous to human AQR/IBP160, an intron-binding spliceosomal "Aquarius" protein with a helicase-like domain; EMB-4 is required for the loss of PIE-1 and H3meK4 histones from the germline at its Z2/Z3 stage, and thus for the condensation of germline chromatin in Z2/Z3; EMB-4 is also required for normal embryonic and postembryonic de…
cel-miR-80-3p	WBGene00001331	erd-2	141	-13.13	erd-2 encodes a protein with homology to human ER lumen protein retaining receptor 1.
cel-miR-80-3p	WBGene00004152	pqn-70	148	-9.66	The protein product of this gene is predicted to contain a glutamine/asparagine (Q/N)-rich ("prion") domain, by the algorithm of Michelitsch and Weissman (as of the WS77 release of WormBase, i.e., in wormpep77).
cel-miR-80-3p	WBGene00004751	sea-2	287	-25.79	sea-2 encodes a zinc finger protein; SEA-2 is an autosomal signal element (ASE) that functions to interpret the X:A chromosomal ratio; in addition, SEA-2 functions autonomously in the intestine to regulate adult lifespan and autonomously in seam cells to regulate larval developmental timing; in regulating lifespan and developmental timing, SEA-2 functions as a post-transcriptional negative regula…
cel-miR-80-3p	WBGene00006956	wrt-10	150	-15.84	wrt-10 encodes a hedgehog-like protein, with an N-terminal signal sequence, a Wart domain, and a C-terminal region of low-complexity sequence; WRT-10 is expressed in both male and hermaphrodite intestine; the Wart domain is predicted to form a cysteine-crosslinked protein involved in intercellular signalling, and it has subtle similarity to the N-terminal Hedge domain of HEDGEHOG proteins; WRT-10…
cel-miR-80-3p	WBGene00007227	C01G6.5	159	-17.58	none available
cel-miR-80-3p	WBGene00001607	gln-6	145	-13.29	none available
cel-miR-80-3p	WBGene00012600	Y38E10A.22	142	-21.68	none available
cel-miR-80-3p	WBGene00003085	lst-3	154	-17.67	none available
cel-miR-80-3p	WBGene00000376	ccr-4	147	-22.45	none available
cel-miR-80-3p	WBGene00001972	hmg-1.2	141	-14.26	none available
cel-miR-80-3p	WBGene00001431	fkb-6	161	-19.02	fkb-6 encodes a peptidyl-prolyl cis-trans isomerase that is most closely related to mammalian FK506-binding protein 4; loss of fkb-6 activity via large-scale RNAi screens indicates that fkb-6 is required for embryonic and vulval development as well as wild type brood size; FKB-6 exhibits peptidyl-prolyl cis-trans isomerase activity in vitro, and physically interacts with the Hsp90 ortholog DAF-21…
cel-miR-80-3p	WBGene00019227	sgca-1	144	-15.87	sgca-1 encodes a protein orthologous to the human gene SARCOGLYCAN, ALPHA (50KD DYSTROPHIN-ASSOCIATED GLYCOPROTEIN) (SGCA; OMIM:600119), which when mutated leads to disease.
cel-miR-80-3p	WBGene00010621	egg-6	141	-17.67	egg-6 encodes an extracellular leucine-rich repeat protein; egg-6 is required for proper organization of the apical extracellular matrix.
cel-miR-80-3p	WBGene00007384	swt-3	147	-13.63	none available
cel-miR-80-3p	WBGene00003986	mct-4	145	-9.75	pes-22 encodes a predicted transmembrane protein that is a member of the monocarboxylate porter subfamily of the major facilitator superfamily of transmembrane transporters; pes-22 was identified in promoter-trapping screens and by homology, is predicted to function in the transport of lactate and pyruvate across cell membranes, possibly as part of a metabolic pathway that allows these metabolite…
cel-miR-80-3p	WBGene00000846	cup-5	149	-14.41	The cup-5 gene encodes an ortholog of the human mucolipin 1 gene; cup-5 is required for viability, endo-lysosomal transport and the normal degradation of lysosomes; cup-5 mutants also show increased cell death, which might be a secondary consequence of lysosomal dysfunction; the inactivation of mrp-4 which is a ABCC transporter rescues most of the defects in cup-5 mutants, suggesting that the acc…
cel-miR-80-3p	WBGene00011662	T09F3.2	149	-15.99	none available
cel-miR-80-3p	WBGene00012982	jmjd-2	159	-14.45	none available
cel-miR-80-3p	WBGene00006975	zfp-1	152	-19.82	zfp-1 encodes a leucine zipper, zinc finger, and PHD/LAP domain (plant homeodomain/leukemia-associated protein)-containing protein homologous to human AF10 (OMIM:602409, which is involved in chromosomal translocations associated with acute leukemia); loss of zfp-1 activity via RNA-mediated interference (RNAi) results in suppression of RNAi, suggesting that ZFP-1 plays a role in gene silencing; ba…
cel-miR-80-3p	WBGene00010280	rde-12	146	-16.83	none available
cel-miR-80-3p	WBGene00011230	nud-2	140	-14.96	nud-2 encodes an ortholog of human NDE1 and NDEL1, effectors of LIS1; NUD-2, along with other orthologs of LIS1-associated proteins (NUD-1, DHC-1, CDK-5, and CDKA-1), is required to prevent convulsions induced by exposure to the GABA antagonist pentylenetetrazole (PTZ); nud-2(RNAi), like RNAi of nud-1 et al., not only induces PTZ susceptibility but also causes GABA-containing synaptic vesicles in…
cel-miR-80-3p	WBGene00008166	saps-1	144	-16.15	none available
cel-miR-250-3p	WBGene00000881	cyn-5	150	-11.65	cyn-5 encodes a cyclophilin that is functional in vitro and is predicted to be a secreted protein that is structurally most similar to human cyclophilin B; expressed in the intestine.
cel-miR-250-3p	WBGene00010204	F57F5.1	144	-13.76	none available
cel-miR-250-3p	WBGene00019946	chat-1	141	-10.17	none available
cel-miR-250-3p	WBGene00003962	pdi-1	143	-20.28	pdi-1 encodes a protein disulfide isomerase; loss of function mutations in pdi-1 result in no obvious abnormalities, but animals triply mutant for three C. elegans PDI"s, encoded by pdi-1, pdi-2, and pdi-3, display embryonic lethality characterized by loss of vermiform morphology after elongation, suggesting that the pdi genes function redundantly in embryonic morphogenesis; PDI-1 exhibits protei…
cel-miR-250-3p	WBGene00001303	emo-1	142	-11.98	emo-1 encodes an ortholog of S. cerevisiae Sec61p gamma subunit, which is required for translocation of secreted and membrane proteins into the endoplasmic reticulum; EMO-1 is required for oogenesis and ovulation.
cel-miR-250-3p	WBGene00016655	acbp-1	140	-11.4	acbp-1 encodes a highly conserved protein containing a functional acyl-CoA-binding binding domain orthologous to human DBI (Diazepam Binding inhibitor) (OMIM: 125950) required for protein stability and ligand binding; acyl-CoA proteins are required for lipid droplet morphology and lipid storage function; acbp-1 mutants have reduced triglycerides, aberrant lipid droplet morphology and number in th…
cel-miR-250-3p	WBGene00012097	abcf-2	151	-10.6	none available
cel-miR-250-3p	WBGene00018512	trpp-8	150	-13.13	F46F11.9 encodes an ortholog of S. cerevisiae GSG1, involved in intracellular transport and meiosis; F46F11.9 shares an operon with vha-10, and thus might be a previously undescribed V-ATPase component or ancillary protein.
cel-miR-250-3p	WBGene00006920	vha-11	147	-13.6	vha-11 encodes, by alternative splicing, two isoforms of an ortholog of subunit C of the cytoplasmic (V1) domain of vacuolar proton-translocating ATPase (V-ATPase); VHA-11 is a predicted cytosolic stator (stalk) component; VHA-11 is found in dot-like structures around embryonic nuclei, with diffuse distribution in embryonic cytoplasm; in later embryos (comma stage onward), VHA-11 is found in gut …
cel-miR-250-3p	WBGene00011128	R07H5.8	141	-9.13	none available
cel-miR-250-3p	WBGene00006918	vha-9	140	-11.08	vha-9 encodes an ortholog of subunit F of the cytoplasmic (V1) domain of vacuolar proton-translocating ATPase (V-ATPase); VHA-9 is a predicted cytosolic rotor (stalk) component.
cel-miR-250-3p	WBGene00010317	idh-1	148	-12.47	idh-1 encodes a predicted cytosolic isocitrate dehydrogenase; by homology, IDH-1 is predicted to catalyze the formation of alpha-ketoglutarate from isocitrate.
cel-miR-250-3p	WBGene00022037	acs-13	156	-16.81	none available
cel-miR-250-3p	WBGene00001038	dnj-20	156	-17.5	none available
cel-miR-250-3p	WBGene00000793	crh-1	143	-10.47	crh-1 encodes a homolog of the cyclic AMP-response element binding protein (CREB); crh-1 is involved in the transcription of CRE-sequence dependant genes activated by a CaM kinase cascade; crh-1 is required in the bilateral thermosensory neuron AFD, for a memory-related behaviour and for response to tap (nonlocalized mechanosensory stimulation) and tap habituation; crh-1 appears to be ubiquitousl…
cel-miR-250-3p	WBGene00003564	ncs-2	148	-13.82	none available
cel-miR-250-3p	WBGene00004076	pod-2	144	-11.2	pod-2 encodes an acetyl-CoA carboxylase; by sequence similarity, POD-2 is predicted to catalyze the first step in de novo fatty acid biosynthesis; pod-2 is required for proper embryonic polarity and for osmotic protection of the eggshell; pod-2 activity is also required for molting.
cel-miR-250-3p	WBGene00004274	rab-11.1	143	-17.02	rab-11.1 encodes a small GTPase homologous to the Rab GTPases that function in endocytosis, membrane fusion, and vesicular trafficking events; RAB-11.1 activity is required for completion of the final stages of cytokinesis during early embryogenesis and for efficient uptake of yolk proteins during oocyte development; RAB-11.1 is also required for normal peripheral localization of nuclei in the sy…
cel-miR-250-3p	WBGene00004266	rab-1	144	-13.05	rab-1 encodes an ortholog of the small Ras-like GTPase Rab1; by homology, RAB-1 is predicted to play a role in intracellular vesicle trafficking, and consistent with this broad role, large-scale RNAi screens indicate that rab-1 activity is required for fertility, movement, and survival; in yeast two-hybrid assays, RAB-1 interacts with TIR-1, a C. elegans SARM ortholog that is required for innate …
cel-miR-250-3p	WBGene00016500	memo-1	143	-16.95	none available
cel-miR-250-3p	WBGene00077761	zip-9	140	-10.83	none available
cel-miR-250-3p	WBGene00021047	zfp-3	143	-14.64	none available
cel-miR-250-3p	WBGene00003916	par-1	140	-12.66	par-1 encodes a serine-threonine kinase; maternally provided PAR-1 is essential for establishing early embryonic polarity; PAR-1 is present in the cytoplasm and in the cell cortex and asymmetrically localized to the posterior cortex of late one-cell stage embryos; PAR-1 is continuously asymmetrically localized to the P lineage (germline blastomeres) at each subsequent division, and evenly distrib…
cel-miR-250-3p	WBGene00003476	mtm-3	145	-11.71	mtm-3 encodes, by alternative splicing, two isoforms of a myotubularin lipid phosphatase orthologous to human MTMR3 and MTMR4 and paralogous to MTM1; MTM-3 is required for normal locomotion in older adults and for normally long lifespan; MTM-3 has phosphatidylinositol 3-phosphate (PI3P) phosphatase activity; MTM-3 contains a C-terminal FYVE domain that binds PI3P in vitro; MTM-3 is expressed thro…
cel-miR-250-3p	WBGene00014023	lnkn-1	149	-14.29	lnkn-1 encodes a conserved, single-pass type I transmembrane glycoprotein with seven atypical FG-GAP domains in the extracellular domain, which potentially folds into a beta-propeller structure resembling the alpha-integrin ligand-binding domain; LNKN-1 is necessary for attachment of the male linker cell to the developing vas deferens and thus for normal male gonad migration; LNKN-1 is also requi…
cel-miR-250-3p	WBGene00010697	uda-1	144	-13.92	none available
cel-miR-250-3p	WBGene00001262	emb-8	300	-25.48	emb-8 encodes the C. elegans NADPH-cytochrome P450 reductase ortholog; by homology, EMB-8 is predicted to function in the enzymatic reduction of the cytochrome P450 monooxygenase enzymes that play a role in fatty acid modification; during embryonic development, emb-8 activity is essential for normal interactions between the pronucleus/centrosome complex and the posterior cortex and thus, for prop…
cel-miR-250-3p	WBGene00001089	dre-1	152	-11.32	dre-1 encodes an ortholog of human FBXO11/PRMT9 (OMIM:607871, associated with vitiligo and otitis media) that is required, in conjunction with DAF-12 and its partners, for global developmental timing of the transistion from larval to adult cell fates; DRE-1 has an N-terminal F-box domain, three central tandem C-terminal CASH domains, and a C-terminal zinc finger; hypomorphic dre-1 mutations are s…
cel-miR-250-3p	WBGene00010427	hpo-11	154	-11.74	none available
cel-miR-250-3p	WBGene00003620	nhr-21	140	-11.51	none available
cel-miR-250-3p	WBGene00013350	slr-2	145	-16.54	none available
cel-miR-250-3p	WBGene00007030	epc-1	140	-11.68	none available
cel-miR-250-3p	WBGene00013690	hprt-1	146	-12.82	hprt-1 encodes an ortholog of human HYPOXANTHINE PHOSPHORIBOSYLTRANSFERASE 1 (HPRT1), which when mutated leads to Lesch-Nyhan syndrome (OMIM:308000).
cel-miR-250-3p	WBGene00001562	lin-66	283	-26.78	lin-66 encodes an unfamiliar protein, with visible homologs only in nematodes, that was identified in screens for molecules that interact with GEX-3, a homolog of mammalian protein ligands of the small GTPase Rac1, that is essential for ventral enclosure during embryonic development; LIN-66 is expressed in body wall and vulval muscles, and is also detected in the intestine, neurons, and probably …
cel-miR-250-3p	WBGene00022114	Y71F9AL.9	301	-30.77	none available
cel-miR-250-3p	WBGene00015752	C14B9.2	155	-12.72	C14B9.2 encodes a protein disulfide isomerase; by homology, the product of C14B9.2 is predicted to function in oxidative protein folding in the endoplasmic reticulum (ER); C14B9.2 transcript levels are increased in response to ER stress.
cel-miR-250-3p	WBGene00004175	pqn-96	149	-14.41	The protein product of this gene is predicted to contain a glutamine/asparagine (Q/N)-rich ("prion") domain, by the algorithm of Michelitsch and Weissman (as of the WS77 release of WormBase, i.e., in wormpep77).
cel-miR-250-3p	WBGene00012182	osta-3	144	-9.91	none available
cel-miR-250-3p	WBGene00006833	unc-108	140	-10.05	unc-108 encodes a small GTPase homologous to the Rab GTPases that function in endocytosis, membrane fusion, and vesicular trafficking events; unc-108 function is required in neurons for normal locomotion; unc-108 also functions in the removal of apoptotic cells, specifically it functions in engulfing cells for the recruitment and fusion of the lysosome to the phagosome; unc-108 is expressed in ne…
cel-miR-250-3p	WBGene00007135	cdk-12	146	-14.06	none available
cel-miR-250-3p	WBGene00022425	plst-1	145	-17.12	none available
cel-miR-250-3p	WBGene00022450	ubc-26	140	-9.74	none available
cel-miR-250-3p	WBGene00003636	nhr-46	140	-10.92	none available
cel-miR-250-3p	WBGene00006770	unc-34	144	-15.9	unc-34 encodes an EVH1 domain-containing protein that is the sole C. elegans Enabled/VASP homolog; during development, unc-34 activity is required for proper cell migration and axon guidance and for normal locomotion and posterior body morphology; in regulating axon guidance, genetic analyses suggest that unc-34 likely functions downstream of slt-1/Slit and sax-3/Robo as well as unc-6/Netrin and …
cel-miR-250-3p	WBGene00007016	mdt-15	147	-13.8	mdt-15 encodes, by alternative splicing, two isoforms of a Mediator subunit orthologous to human MED15 (OMIM:607372, deleted in DiGeorge syndrome); together with NHR-49 and SBP-1, MDT-15 is required for normal fat accumulation, for expression of fatty acid (FA) desaturase genes (fat-5, fat-6, and fat-7), for normal levels of mono- and polyunsaturated FAs (PUFAs), and for viability, fecundity, mob…
cel-miR-250-3p	WBGene00016162	crh-2	144	-10.55	none available
cel-miR-250-3p	WBGene00004268	rab-5	142	-17.06	rab-5 encodes the C. elegans Rab5 GTPase ortholog; RAB-5 activity is required for receptor-mediated yolk endocytosis and for phagosome maturation involved in apoptotic cell clearance; rab-5 mutations also affect localization of P granules and PAR-2, as well as the cytoplasmic appearance of cells in the early embryo and larval development; RAB-5 localizes to early endosomes and maturing phagosomes.
cel-miR-250-3p	WBGene00004032	pkc-1	140	-17.37	pkc-1 encodes a serine/threonine protein kinase that is orthologous to mammalian protein kinase C epsilon (PRKCE), a member of the nPKC subgroup of the protein kinase C superfamily; together with UNC-13, PKC-1 may act downstream of goa-1 to modulate phorbol ester-induced stimulation of acetylcholine release at NMJs; PKC-1 positively regulates locomotion, and affects thermotaxis and chemotaxis tog…
cel-miR-250-3p	WBGene00016611	bicd-1	142	-10.3	bicd-1 encodes the C. elegans homolog of Drosophila BicaudalD, a dynein regulator; in C. elegans, bicd-1 is an essential gene and is also required for hyp7 nuclear migrations; BICD-1 physically interacts with UNC-83 and EGAL-1, and thus likely functions as part of a dynein regulatory complex (that also includes DLC-1) that controls the directionality and extent of nuclear migrations; a bicd-1::GF…
cel-miR-250-3p	WBGene00008121	C46F11.6	140	-14.96	none available
cel-miR-250-3p	WBGene00009259	hpo-34	140	-9.29	none available
cel-miR-250-3p	WBGene00021644	Y47G6A.18	154	-13	none available
cel-miR-250-3p	WBGene00004739	scd-1	141	-13.72	scd-1 encodes a novel protein with several regions that are extremely glutamine (Q) rich, interspersed with other residues (usually alanine); SCD-1 affects signalling by proteins in the DAF-7/transforming growth factor (TGF)-beta pathway (DAF-1, DAF-8, and DAF-14), and the Q-rich regions of SCD-1 protein may mediate epigenetic changes of stably heritable tertiary conformation.
cel-miR-250-3p	WBGene00000040	aco-1	144	-8.97	aco-1 encodes an aconitase that is homologous to mammalian iron regulatory protein-1 (IRP1); aco-1 activity is required for normal brood sizes and, under iron stress conditions, for normal lifespan and L4-to-adult growth rates; ACO-1 physically interacts with GEX-3; like IRP1, ACO-1 has aconitase activity and is post-translationally regulated by iron, but, unlike IRP1, it lacks RNA-binding activi…
cel-miR-250-3p	WBGene00019351	lron-7	159	-15.22	none available
cel-miR-250-3p	WBGene00001560	gei-3	146	-15.53	gei-3 encodes a member of the high mobility group (HMG) protein family; interacts with GEX-3 in yeast two-hybrid assays.
cel-miR-250-3p	WBGene00021237	crtc-1	142	-12.4	crtc-1 encodes a CREB-regulated transcriptional coactivator orthologous to mammalian CRTCs (OMIM: 608972); CRTC-1 is a central node linking the upstream lifespan modifiers AMPK and calcineurin to CREB activity via a shared signal-transduction pathway; posttranslational modification of CRTC-1 is required for their effects on longevity; CRTC-1 is both a critical and direct target of aak-2-mediated …
cel-miR-250-3p	WBGene00002979	lfe-2	152	-12.61	lfe-2 encodes an inositol (1,4,5) triphosphate-3-kinase (IP3K); lfe-2 activity is required for normal levels of hermaphrodite fertility and for tissue-specific negative regulation of the LET-23 signaling pathway that controls spermathecal dilation and ovulation; in vitro, LFE-2 can exhibit catalytic activity, converting IP3 to IP4; an lfe-2::GFP transcriptional fusion is expressed in the adult sp…
cel-miR-250-3p	WBGene00019077	F59A3.4	148	-11.96	none available
cel-miR-250-3p	WBGene00004755	sec-24.1	297	-27.95	sec-24.1 encodes one of two C. elegans Sec24 homologs; in Saccharomyces cerevisiae, Sec24 is a member of the Sec24-Sec23 subunit of the COPII coat complex, assembly of which is essential for the first step of secretory protein transport from the endoplasmic reticulum (ER) to the Golgi; by homology with Sec24, SEC-24.1 is predicted to facilitate vesicle cargo selection, and likely contains multipl…
cel-miR-250-3p	WBGene00011953	ppm-2	140	-11.61	none available
cel-miR-250-3p	WBGene00006996	zyg-11	144	-17.56	zyg-11 encodes a protein containing four diverged leucine-rich repeats and an armadillo-like helical domain and is conserved in metazoa, but not found in Drosophila; during development, ZYG-11 functions as the substrate-recognition subunit for a CUL-2-based ubiquitin-ligase complex that is required for a number of biological processes including progression through meiotic anaphase II, mitotic chr…
cel-miR-250-3p	WBGene00004927	snx-1	144	-10.38	snx-1 encodes a PX and BAR domain-containing protein that is the C. elegans ortholog of the Vps5/SNX1 subunit of the core retromer complex; in C. elegans, SNX-1 functions as a component of the retromer complex that, along with RME-8 and HSP-1, regulates retrograde endosome-to-Golgi transport through control of endosomal clathrin dynamics; SNX-1 binds RME-8 in vitro; SNX-1 is expressed in several …
cel-miR-250-3p	WBGene00021626	rft-2	147	-12.93	none available
cel-miR-250-3p	WBGene00020092	pcf-11	146	-16.99	none available
cel-miR-250-3p	WBGene00000289	cam-1	142	-11.37	cam-1 encodes a receptor tyrosine kinase of the immunoglobulin superfamily that is orthologous to human ROR1 (OMIM:602336) and ROR2 (OMIM:602337, mutation of which leads to type B brachydactyly); cam-1 is required for locomotion, cell migration, asymmetric cell division, axon outgrowth, and dauer formation; CAM-1, along with LIN-17, CWN-2, and DSH-1, functions as part of a Wnt signaling pathway t…
cel-miR-250-3p	WBGene00017687	ets-4	143	-16.12	none available
cel-miR-250-3p	WBGene00015404	nstp-4	285	-21.91	nstp-4 encodes a transporter of UDP-N-acetylglucosamine (UDP-GlcNAc) and UDP-N-acetylgalactosamine (UDP-GalNAc), orthologous to human SLC35A3 (OMIM:605632); NSTP-4 is redundantly required, with its paralog SRF-3, for normal progression of oocytes through proximal gonads and for normal gonad morphology; nstp-4 is expressed in many tissues, including pharynx, intestine, pharyngeal gland cells, seam…
cel-miR-250-3p	WBGene00003639	nhr-49	140	-12.89	nhr-49 encodes a nuclear hormone receptor (NHR) related to the mammalian HNF4 (hepatocyte nuclear factor 4) family of NHRs; nhr-49 functions as a key regulator of fat metabolism and lifespan by regulating induction of beta-oxidation genes upon food deprivation and activation of stearoyl-CoA desaturase in fed animals, respectively; NHR-49 activates transcription in conjunction with the MDT-15 medi…
cel-miR-250-3p	WBGene00000894	dab-1	144	-15.89	dab-1 encodes an ortholog of the cytoplasmic adaptor protein DISABLED, required for normal molting and meiotic arrest; DAB-1 is also required for EGL-17 secretion from vulval cells, and thus indirectly for normal sex myoblast (SM) migration and egg-laying; DAB-1 contains a conserved PTB domain and signals that confer localization to Golgi-proximal vesicles, and DAB-1 localizes to vesicular struct…
cel-miR-239a-5p	WBGene00010557	mspn-1	163	-19.73	none available
cel-miR-239a-5p	WBGene00019466	tos-1	146	-11.92	none available
cel-miR-239a-5p	WBGene00015248	mai-2	149	-9.39	mai-2/B0546.1 is orthologous to mitochondrial intrinsic ATPase inhibitor protein (IF(1)), which blocks reverse action (ATP hydrolysis) by F(0)F(1)-ATPase when its (normally required) proton gradient is lost; MAI-2 has a mitochondrial import signal at its N-terminus, and is transported to yeast mitochondria; MAI-2 can inhibit yeast F(0)F(1)-ATPase, and this inhibition is pH-dependent; MAI-2"s tert…
cel-miR-239a-5p	WBGene00003762	nlp-24	149	-11.67	none available
cel-miR-239a-5p	WBGene00001113	dur-1	152	-12.3	The dur-1 ("Dauer UpRegulated") gene encodes proteins (DUR-1A and DUR-1C) that are predicted to be hydrophilic and heat-resistant, and that might participate in anhydrobiosis; expression of at least one dur-1 transcript is upregulated in dauer larvae and other transcripts may be specifically expressed in dauer larvae.
cel-miR-239a-5p	WBGene00006784	unc-49	146	-14.08	unc-49 encodes multiple subunits of a heteromeric GABA receptor; unc-49 activity is required for postsynaptic GABA responsiveness and thus for normal regulation of locomotion; UNC-49::GFP reporter fusions for at least two isoforms are expressed in dorsal and ventral head and body wall muscles, with isoform-specific expression also seen in the sphincter muscle; UNC-49::GFP subcellular localization…
cel-miR-239a-5p	WBGene00000473	cey-2	148	-10.97	cey-2 encodes a cold-shock/Y-box domain-containing protein; by homology, CEY-2 is predicted to function as either an RNA-binding protein involved in translation or RNA processing, or a DNA-binding protein involved in transcriptional regulation; cey-2 mRNA is expressed maternally in the early embryo, in a pattern characteristic of class II maternal RNAs, which are initially detected throughout the…
cel-miR-239a-5p	WBGene00010244	F58D5.5	145	-15.3	none available
cel-miR-239a-5p	WBGene00001393	fat-1	156	-17.81	fat-1 encodes an omega-3 fatty acyl desaturase that acts on substrates of 16-20 carbons with a preference for omega-6 fatty acids; FAT-1 dehydrogenates its substrates 3 carbons from the methyl terminus; FAT-1 is required in vivo for n3 polyunsaturated fatty acid (PUFA) synthesis; the fatty acids of fat-1(wa9) mutants consist of 20% arachidonic acid (20:4n6), instead of the 20% eicosapentaenoic ac…
cel-miR-239a-5p	WBGene00003053	lmp-1	147	-21.2	lmp-1 encodes a protein with similarity to vertebrate lysosome-associated membrane proteins CD68, and appears to be the only protein in C. elegans that has a GYXX (phi) vertebrate lysosomal targeting sequence at its carboxy terminus; LMP-1 is widely expressed in the early embryo, with later expression seen in the intestine, coelomocytes, and neurons; LMP-1 localizes to lysosomes and is recruited …
cel-miR-239a-5p	WBGene00000472	cey-1	141	-10.66	cey-1 encodes a protein with a cold-shock/Y-box domain that is expressed in early embryonic blastomeres (at the 15-cell stage, i.e., pre-gastrulation), but is normally repressed in early germline blastomeres by PIE-1.
cel-miR-239a-5p	WBGene00004208	ptc-1	140	-8.72	ptc-1 encodes an ortholog of Drosophila PATCHED (PTC) and human PTCH which defines one of seven paralogous families of sterol sensing domain (SSD) proteins; PTC-1 is required for cytokinesis in the germline, but not in somatic cells (the converse of PTR-2"s function, and a role conserved in C. briggsae); PTC-1 is also required to isolate meiotic germline nuclei from one another so that their nucl…
cel-miR-239a-5p	WBGene00020131	gcy-28	143	-9.81	gcy-28 encodes a membrane-bound guanylyl cyclase with an extracellular ligand binding domain, a transmembrane domain, and a guanylyl cyclase domain; GCY-28 regulates odor preferences in AWC sensory neurons; gcy-28 regulates the sensory integration in the nervous system and that function of gcy-28 at adulthood is sufficient for normal sensory integration; GCY-28 in AIA interneurons is important fo…
cel-miR-239a-5p	WBGene00001089	dre-1	142	-13.5	dre-1 encodes an ortholog of human FBXO11/PRMT9 (OMIM:607871, associated with vitiligo and otitis media) that is required, in conjunction with DAF-12 and its partners, for global developmental timing of the transistion from larval to adult cell fates; DRE-1 has an N-terminal F-box domain, three central tandem C-terminal CASH domains, and a C-terminal zinc finger; hypomorphic dre-1 mutations are s…
cel-miR-239a-5p	WBGene00003989	pfn-1	144	-12.78	pfn-1 encodes a profilin; pfn-1 is required for embryonic cytokinesis, specifically for the assembly or maintenance of cortical microfilaments and myosin; PFN-1 physically interacts with the CYK-1 Formin Homology protein; PFN-1 localizes to the cell cortex.
cel-miR-239a-5p	WBGene00015547	ain-1	153	-18.02	ain-1 encodes an unfamiliar protein synergistically required, with LIN-31, for the normal timing of vulval differentiation, independently of LET-60/RAS, and parallel to or downstream of LIN-14/LIN-28/HBL-1; AIN-1 is expressed in cytoplasmic foci (that are probably P bodies) in several tissues, including vulval precursor cells and neurons; AIN-1 coimmunoprecipitates with DCR-1 and ALG-1, also bind…
cel-miR-239a-5p	WBGene00000301	cav-1	141	-13.24	cav-1 encodes one of two C. elegans caveolin orthologs; cav-1 is required for viability and Ras/MAP-kinase-dependent progression through the meiotic cell cycle; CAV-1 is expressed in the adult germ line and during embryonic development; CAV-1::GFP localizes to cortical granules that function to secrete chondroitin and mucin-like proteoglycans to the extracellular space following fertilization.
cel-miR-239a-5p	WBGene00001851	hif-1	150	-13.29	hif-1 encodes an ortholog of the mammalian hypoxia-induced factor HIF-1, and is required for survival in hypoxic environments (1% oxygen) that have no effect on wild-type C. elegans.
cel-miR-239a-5p	WBGene00019001	ipgm-1	140	-7.14	ipgm-1 encodes an experimentally confirmed cofactor-independent phosphoglycerate mutase that is essential for embryonic and larval viability, and for normal body morphology; paradoxically, ipgm-1 is also required for normally short lifespan (in mass RNAi screens for Age phenotypes); IPGM-1 exhibits phosphoglycerate mutase activity when expressed in vitro; ipgm-1 is expressed widely in larvae and …
cel-miR-239a-5p	WBGene00006579	tlk-1	144	-12.07	tlk-1 encodes, through alternative splicing, two isoforms of a Tousled-class serine/threonine protein kinase; TLK-1A/B are orthologous to Tousled from A. thaliana; tlk-1(RNAi) embryos have, compared to normal embryos, reduced phosphorylation of the RNA polymerase II C-terminal domain at Serine-2 and methylation of histone H3 at Lysine-36 (posttranslational modifications associated with transcript…
cel-miR-239a-5p	WBGene00002889	let-765	143	-10.59	none available
cel-miR-239a-5p	WBGene00001330	eps-8	140	-11.81	eps-8 is encodes a cell signaling adaptor protein that contains and N-terminal PTB domain, and C-terminal SH3 and actin-binding domains; EPS-8 is essential for epidermal and intestinal cells morphogenesis; eps-8 is also involved in trafficking of the LET-23 EGF receptor during vulval development; EPS-8 physically interacts with the ankyrin repeat protein VAB-19 and demonstrates a novel actin barb…
cel-miR-239a-5p	WBGene00001208	egl-44	148	-18.5	egl-44 encodes a transcription enhancer factor of the TEA domain (TEAD) class; egl-44 activity is required to repress the touch cell fate in some cells and to promote aspects of HSN differentiation; EGL-44 physically interacts with YAP-1, a C. elegans Yes-associated protein (YAP) homolog, and when co-expressed, the two proteins are able to activate a TEAD reporter; an EGL-44::GFP fusion protein i…
cel-miR-239a-5p	WBGene00022598	ztf-8	144	-22.88	none available
cel-miR-239a-5p	WBGene00008878	ppfr-1	152	-23.91	ppfr-1 encodes a protein phosphatase regulatory subunit; PPFR-1 functions as a regulatory subunit of a protein phosphatase 4 complex that regulates the phosphorylation status, and activity of, the MEI-1/katanin microtubule severing activity during meiosis; ppfr-1(RNAi) in wild-type animals results in fertility defects in F1 hermaphrodites, who exhibit a 90-95% decrease in the total number of eggs…
cel-miR-239a-5p	WBGene00001679	gpb-1	146	-11.82	gpb-1 encodes a heterotrimeric G protein beta subunit that is required during embryonic development for the proper orientation of the mitotic spindle during early cell divisions and thus affects the orientation of early cell division axes, and is also required for larval viability, negatively regulates locomotion and egg-laying, and may affect germline development and osmotic balance; expressed i…
cel-miR-239a-5p	WBGene00008411	mans-1	143	-19.54	none available
cel-miR-239b-5p	WBGene00010557	mspn-1	163	-15.91	none available
cel-miR-239b-5p	WBGene00019466	tos-1	141	-10.07	none available
cel-miR-239b-5p	WBGene00015248	mai-2	149	-9.39	mai-2/B0546.1 is orthologous to mitochondrial intrinsic ATPase inhibitor protein (IF(1)), which blocks reverse action (ATP hydrolysis) by F(0)F(1)-ATPase when its (normally required) proton gradient is lost; MAI-2 has a mitochondrial import signal at its N-terminus, and is transported to yeast mitochondria; MAI-2 can inhibit yeast F(0)F(1)-ATPase, and this inhibition is pH-dependent; MAI-2"s tert…
cel-miR-239b-5p	WBGene00003762	nlp-24	156	-12.69	none available
cel-miR-239b-5p	WBGene00000779	cpn-3	143	-12.65	cpn-3 encodes a calponin homolog, most closely related to its paralog CPN-4 in C. elegans; CPN-3 is more similar to the calponin paralogs transgelin (SM22 alpha) or neuronal protein NP25 than to calponin per se.
cel-miR-239b-5p	WBGene00001113	dur-1	152	-12.9	The dur-1 ("Dauer UpRegulated") gene encodes proteins (DUR-1A and DUR-1C) that are predicted to be hydrophilic and heat-resistant, and that might participate in anhydrobiosis; expression of at least one dur-1 transcript is upregulated in dauer larvae and other transcripts may be specifically expressed in dauer larvae.
cel-miR-239b-5p	WBGene00006784	unc-49	140	-12.33	unc-49 encodes multiple subunits of a heteromeric GABA receptor; unc-49 activity is required for postsynaptic GABA responsiveness and thus for normal regulation of locomotion; UNC-49::GFP reporter fusions for at least two isoforms are expressed in dorsal and ventral head and body wall muscles, with isoform-specific expression also seen in the sphincter muscle; UNC-49::GFP subcellular localization…
cel-miR-239b-5p	WBGene00000473	cey-2	140	-9.21	cey-2 encodes a cold-shock/Y-box domain-containing protein; by homology, CEY-2 is predicted to function as either an RNA-binding protein involved in translation or RNA processing, or a DNA-binding protein involved in transcriptional regulation; cey-2 mRNA is expressed maternally in the early embryo, in a pattern characteristic of class II maternal RNAs, which are initially detected throughout the…
cel-miR-239b-5p	WBGene00010244	F58D5.5	146	-11.31	none available
cel-miR-239b-5p	WBGene00001393	fat-1	156	-10.03	fat-1 encodes an omega-3 fatty acyl desaturase that acts on substrates of 16-20 carbons with a preference for omega-6 fatty acids; FAT-1 dehydrogenates its substrates 3 carbons from the methyl terminus; FAT-1 is required in vivo for n3 polyunsaturated fatty acid (PUFA) synthesis; the fatty acids of fat-1(wa9) mutants consist of 20% arachidonic acid (20:4n6), instead of the 20% eicosapentaenoic ac…
cel-miR-239b-5p	WBGene00004208	ptc-1	142	-12.94	ptc-1 encodes an ortholog of Drosophila PATCHED (PTC) and human PTCH which defines one of seven paralogous families of sterol sensing domain (SSD) proteins; PTC-1 is required for cytokinesis in the germline, but not in somatic cells (the converse of PTR-2"s function, and a role conserved in C. briggsae); PTC-1 is also required to isolate meiotic germline nuclei from one another so that their nucl…
cel-miR-239b-5p	WBGene00020131	gcy-28	143	-9.81	gcy-28 encodes a membrane-bound guanylyl cyclase with an extracellular ligand binding domain, a transmembrane domain, and a guanylyl cyclase domain; GCY-28 regulates odor preferences in AWC sensory neurons; gcy-28 regulates the sensory integration in the nervous system and that function of gcy-28 at adulthood is sufficient for normal sensory integration; GCY-28 in AIA interneurons is important fo…
cel-miR-239b-5p	WBGene00001178	egl-9	144	-8.97	egl-9 encodes a proline hydroxylase; EGL-9 functions in a conserved hypoxia-sensing pathway to negatively regulate HIF-1 (hypoxia inducible factor) by hydroxylating prolyl HIF-1 residues; EGL-9 activity is negatively regulated by its physical association with CYSL-1, a protein with similarity to cysteine synthases that acts to transduce information about the environmental O2 levels through H2S (h…
cel-miR-239b-5p	WBGene00001089	dre-1	142	-10.48	dre-1 encodes an ortholog of human FBXO11/PRMT9 (OMIM:607871, associated with vitiligo and otitis media) that is required, in conjunction with DAF-12 and its partners, for global developmental timing of the transistion from larval to adult cell fates; DRE-1 has an N-terminal F-box domain, three central tandem C-terminal CASH domains, and a C-terminal zinc finger; hypomorphic dre-1 mutations are s…
cel-miR-239b-5p	WBGene00003989	pfn-1	148	-7.07	pfn-1 encodes a profilin; pfn-1 is required for embryonic cytokinesis, specifically for the assembly or maintenance of cortical microfilaments and myosin; PFN-1 physically interacts with the CYK-1 Formin Homology protein; PFN-1 localizes to the cell cortex.
cel-miR-239b-5p	WBGene00015547	ain-1	148	-13.9	ain-1 encodes an unfamiliar protein synergistically required, with LIN-31, for the normal timing of vulval differentiation, independently of LET-60/RAS, and parallel to or downstream of LIN-14/LIN-28/HBL-1; AIN-1 is expressed in cytoplasmic foci (that are probably P bodies) in several tissues, including vulval precursor cells and neurons; AIN-1 coimmunoprecipitates with DCR-1 and ALG-1, also bind…
cel-miR-239b-5p	WBGene00001747	gsp-1	141	-14.52	none available
cel-miR-239b-5p	WBGene00001851	hif-1	150	-12.59	hif-1 encodes an ortholog of the mammalian hypoxia-induced factor HIF-1, and is required for survival in hypoxic environments (1% oxygen) that have no effect on wild-type C. elegans.
cel-miR-239b-5p	WBGene00019001	ipgm-1	140	-7.14	ipgm-1 encodes an experimentally confirmed cofactor-independent phosphoglycerate mutase that is essential for embryonic and larval viability, and for normal body morphology; paradoxically, ipgm-1 is also required for normally short lifespan (in mass RNAi screens for Age phenotypes); IPGM-1 exhibits phosphoglycerate mutase activity when expressed in vitro; ipgm-1 is expressed widely in larvae and …
cel-miR-239b-5p	WBGene00006579	tlk-1	152	-13.75	tlk-1 encodes, through alternative splicing, two isoforms of a Tousled-class serine/threonine protein kinase; TLK-1A/B are orthologous to Tousled from A. thaliana; tlk-1(RNAi) embryos have, compared to normal embryos, reduced phosphorylation of the RNA polymerase II C-terminal domain at Serine-2 and methylation of histone H3 at Lysine-36 (posttranslational modifications associated with transcript…
cel-miR-239b-5p	WBGene00018285	smk-1	145	-10.22	smk-1 encodes a novel, evolutionarily conserved protein that is orthologous to the mammalian and Dictyostelium discoideum SMEK (suppressor of MEK null) proteins; smk-1 activity is essential for several aspects of DAF-16-mediated longevity namely, the defense response to pathogenic bacteria and increased resistance to oxidative and UV-induced damage; in regulating DAF-16 activity, SMK-1 appears to…
cel-miR-239b-5p	WBGene00004032	pkc-1	145	-14.29	pkc-1 encodes a serine/threonine protein kinase that is orthologous to mammalian protein kinase C epsilon (PRKCE), a member of the nPKC subgroup of the protein kinase C superfamily; together with UNC-13, PKC-1 may act downstream of goa-1 to modulate phorbol ester-induced stimulation of acetylcholine release at NMJs; PKC-1 positively regulates locomotion, and affects thermotaxis and chemotaxis tog…
cel-miR-239b-5p	WBGene00016158	ari-1	145	-9.82	none available
cel-miR-239b-5p	WBGene00001208	egl-44	141	-15.19	egl-44 encodes a transcription enhancer factor of the TEA domain (TEAD) class; egl-44 activity is required to repress the touch cell fate in some cells and to promote aspects of HSN differentiation; EGL-44 physically interacts with YAP-1, a C. elegans Yes-associated protein (YAP) homolog, and when co-expressed, the two proteins are able to activate a TEAD reporter; an EGL-44::GFP fusion protein i…
cel-miR-239b-5p	WBGene00001679	gpb-1	144	-9.35	gpb-1 encodes a heterotrimeric G protein beta subunit that is required during embryonic development for the proper orientation of the mitotic spindle during early cell divisions and thus affects the orientation of early cell division axes, and is also required for larval viability, negatively regulates locomotion and egg-laying, and may affect germline development and osmotic balance; expressed i…
cel-miR-392-5p	WBGene00006781	unc-45	146	-20	unc-45 encodes a conserved, muscle-specific protein that contains an N-terminal TRP (tetratricopeptide repeat) and a C-terminal UCS (UNC-45-CRO1-She4p) domain; during body wall muscle development, UNC-45 activity is essential for proper thick filament formation and sarcomere organization; in addition, maternally provided UNC-45 is required for embryonic polarity, cytokinesis, and germline cellula…
cel-miR-392-5p	WBGene00001426	fkb-1	149	-20.74	fkb-1 encodes a homolog of mouse FK506-binding protein 2.
cel-miR-392-5p	WBGene00006913	vha-4	144	-15.06	vha-4 encodes an ortholog of subunit c"" of the membrane-bound (V0) domain of vacuolar proton-translocating ATPase (V-ATPase); VHA-4 is a predicted V-ATPase transmembrane rotor component; VHA-4 is paralogous to the c subunits VHA-1/-2/-3, and is predicted to help carry protons from the cytosol to a-subunits (VHA-5, VHA-6, VHA-7, or UNC-32) for transmembrane export; VHA-4 is required for ovulation…
cel-miR-392-5p	WBGene00002980	lgg-1	146	-17.45	lgg-1 encodes the C. elegans ortholog of Saccharomyces cerevisiae Atg8p and mammalian MAP-LC3; by homology, LGG-1 is predicted to be required for the degradation of cellular components by autophagy; loss of lgg-1 function via RNAi indicates that, like several other C. elegans genes involved in autophagy, lgg-1 is essential for normal dauer morphogenesis and life-span extension; a GFP::LGG-1 repor…
cel-miR-392-5p	WBGene00022515	ttr-48	143	-17.1	none available
cel-miR-392-5p	WBGene00001000	dim-1	146	-14.77	dim-1 encodes novel proteins containing three immunoglobulin-like repeats in the carboxy terminus; dim-1 was originally identified in screens for mutations that suppress locomotion defects caused by aberrant muscle assembly in animals carrying a missense mutation in unc-112, which encodes a pleckstrin homology domain-containing protein required for the early stages of muscle assembly; loss-of-fun…
cel-miR-392-5p	WBGene00015755	C14B9.10	140	-20.76	none available
cel-miR-392-5p	WBGene00003003	lin-14	143	-18.57	lin-14 encodes a novel protein whose activity is required for specifying the division timings of a specific group of cells during postembryonic development; lin-14 loss-of-function mutations result in the premature appearance of later larval lineages, while gain-of-function mutations result in reiteration of L1 larval stages lineages; in addition, lin-14 acts as a positive regulator of AVM, PVM, …
cel-miR-392-5p	WBGene00000113	alh-7	143	-19.07	alh-7 encodes an ortholog of the human gene DJ73M23.2 (NAD+-DEPENDENT SUCCINIC SEMIALDEHYDE DEHYDROGENASE; ALDH5A1), which when mutated leads to SSADH deficiency (OMIM:271980).
cel-miR-392-5p	WBGene00016115	mdt-26	142	-14.83	none available
cel-miR-392-5p	WBGene00001196	egl-30	149	-16.13	egl-30 encodes an ortholog of the heterotrimeric G protein alpha subunit Gq (Gq/G11 class) that affects viability, locomotion, egg laying, synaptic transmission, and pharyngeal pumping; it genetically interacts with the goa-1 pathway, and is probably expressed ubiquitously, with highest expression in excitable cells.
cel-miR-392-5p	WBGene00010427	hpo-11	146	-22.31	none available
cel-miR-392-5p	WBGene00002190	kin-2	142	-12.91	kin-2 encodes a predicted regulatory subunit of a cAMP-dependent protein kinase that may act downstream of, or in parallel to, ric-8.
cel-miR-392-5p	WBGene00001595	gld-1	158	-17.32	gld-1 encodes a protein containing a K homology (KH) RNA binding domain; GLD-1 is required for regulation of the mitosis/meiosis decision during germline development (promotion of meiotic entry) in parallel with gld-2, gld-3, and nos-3 and also affects spermatogenesis; GLD-1 physically interacts with the 3"- and 5"UTR of its putative mRNA targets in vitro to negatively regulate their translation;…
cel-miR-392-5p	WBGene00044342	T05B11.7	163	-24.83	none available
cel-miR-392-5p	WBGene00003048	lit-1	162	-17.58	lit-1 encodes a serine threonine protein kinase homolog related to the Drosophila protein Nemo; lit-1 is required for embryonic viability and plays a central role in controlling the asymmetry of cell divisions during embryogenesis; lit-1 acts downstream of mom-2 with respect to polarity defects and mediates larval cell fate decisions that involve POP-1; lit-1 is also required for amphid channel m…
cel-miR-392-5p	WBGene00002915	let-805	141	-18.26	let-805 encodes myotactin, a novel single-transmembrane protein containing extracellular fibronectin repeats; genetic analyses indicate that LET-805 is essential for proper association between hypodermal fibrous organelles and the contractile apparatus of muscle cells; LET-805 is expressed in hypodermal cells and in the pharynx and localizes to basolateral membranes.
cel-miR-392-5p	WBGene00006593	tol-1	143	-18.25	tol-1 encodes a predicted transmembrane protein that is the sole C. elegans Toll-like receptor (TLR); TOL-1 is required for proper embryonic development and for pathogen avoidance behavior, and is expressed primarily in the nervous system.
cel-miR-392-5p	WBGene00011730	drr-2	142	-21.6	none available
cel-miR-392-3p	WBGene00002045	icd-1	149	-15.91	icd-1 encodes the C. elegans ortholog of the beta-subunit of the nascent polypeptide-associated complex (betaNAC); during development, icd-1 activity is required for prevention of ced-4-dependent, but ced-3-independent, programmed cell death and for normal embryonic development; ICD-1 is widely expressed throughout development and colocalizes primarily with mitochondria.
cel-miR-392-3p	WBGene00000229	atp-2	141	-10.07	atp-2 encodes the beta subunit of the soluble, catalytic F1 portion of ATP synthase (mitochondrial respiratory chain [MRC] complex V); atp-2 activity is required for embryonic and larval development past the L3 stage, as well as for normal mobility, pharyngeal pumping, defecation, growth rate, and larval lifespan; in males, atp-2 activity is also required cell autonomously in male-specific sensor…
cel-miR-392-3p	WBGene00020230	nep-2	140	-17.35	T05A8.4 encodes a neprilysin; neprilysins are thermolysin-like zinc metallopeptidases, found on the outer surface of animal cells, that negatively regulate small signalling peptides (e.g., enkephalin, tachykinin, insulin, and natriuretic peptides) by cleaving them; while T05A8.4 is an ortholog of mammalian neutral endopeptidase (NEP), expressed on the brush-border membranes of kidney; more genera…
cel-miR-392-3p	WBGene00003153	mca-3	143	-13.25	mca-3 encodes one of three C. elegans plasma membrane Ca2+ ATPases (PMCAs); by homology, MCA-3 is predicted to function as a molecular pump that couples ATP hydrolysis to extrusion of cytosolic Ca2+; mca-3 activity is required for coelomoycte endocytosis, normal coordinated locomotion, and embryonic and larval development; in regulating endocytosis, MCA-3 is required specifically in the early sta…
cel-miR-392-3p	WBGene00006913	vha-4	148	-24.74	vha-4 encodes an ortholog of subunit c"" of the membrane-bound (V0) domain of vacuolar proton-translocating ATPase (V-ATPase); VHA-4 is a predicted V-ATPase transmembrane rotor component; VHA-4 is paralogous to the c subunits VHA-1/-2/-3, and is predicted to help carry protons from the cytosol to a-subunits (VHA-5, VHA-6, VHA-7, or UNC-32) for transmembrane export; VHA-4 is required for ovulation…
cel-miR-392-3p	WBGene00006787	unc-52	150	-14.66	The unc-52 gene encodes perlecan, a protein orthologous to human basement membrane-specific heparan sulfate proteoglycan core protein (HSPG2; OMIM:142461, which when mutated leads to Schwartz-Jampel syndrome or dyssegmental dysplasia); UNC-52 plays essential roles in muscle structure development and regulation of growth factor-like signaling pathways; UNC-52 is synthesized by the hypodermis and l…
cel-miR-392-3p	WBGene00044134	D1025.10	151	-14.82	none available
cel-miR-392-3p	WBGene00006917	vha-8	154	-14.05	vha-8 encodes an ortholog of subunit E of the cytoplasmic (V1) domain of vacuolar proton-translocating ATPase (V-ATPase); VHA-8 is a predicted cytosolic stator (stalk) component; VHA-8 is required for embryonic and larval viability, for ovulation, and for receptor-mediated endocytosis of yolk protein; VHA-8 is highly expressed in the cytoplasm of excretory canals throughout development, and in th…
cel-miR-392-3p	WBGene00006536	tbb-1	163	-18.52	This gene encodes a homolog of mammalian beta-tubulin (TUBB) that is expressed at high levels in the germline; TBB-1 is redundant for embryonic viability, due to its paralog TBB-2.
cel-miR-392-3p	WBGene00012664	Y39B6A.1	141	-18.17	none available
cel-miR-392-3p	WBGene00000277	cab-1	281	-37.49	Novel protein which has a C-terminal motif weakly homologous to mouse NPDC-1 and is involved in synaptic regulation; it is expressed in various neurons including ventral cord and tail ganglion neurons; it physically interacts with AEX-3, which is a guanine nucleotide exchange factor for the Rab3 GTPase.
cel-miR-392-3p	WBGene00016509	adss-1	146	-11.91	none available
cel-miR-392-3p	WBGene00009772	ztf-7	147	-12.35	none available
cel-miR-392-3p	WBGene00011971	lron-9	140	-13.86	none available
cel-miR-392-3p	WBGene00020296	T07A9.8	142	-11.13	none available
cel-miR-392-3p	WBGene00002363	let-92	162	-18.83	let-92 encodes a homolog of PP2AC, the catalytic subunit of protein phosphatase 2A (PP2A); let-92 was identified genetically in screens for essential genes on chromosome IV; LET-92 may regulate a number of signal transduction pathways as it is required for embryogenesis, larval development, Ras-mediated vulval development, and axonal guidance in the DD and VD neurons; let-92 interacts genetically…
cel-miR-392-3p	WBGene00011648	cni-1	140	-12.33	none available
cel-miR-392-3p	WBGene00003916	par-1	140	-16.23	par-1 encodes a serine-threonine kinase; maternally provided PAR-1 is essential for establishing early embryonic polarity; PAR-1 is present in the cytoplasm and in the cell cortex and asymmetrically localized to the posterior cortex of late one-cell stage embryos; PAR-1 is continuously asymmetrically localized to the P lineage (germline blastomeres) at each subsequent division, and evenly distrib…
cel-miR-392-3p	WBGene00001620	glt-1	147	-14.47	glt-1 encodes a predicted plasma membrane glutamate transporter that is functional when expressed in Xenopus oocytes; expressed in the M3 pharyngeal neuron, the male tail, some anterior hypodermal cells, and in cells in the terminal bulb of the pharynx.
cel-miR-392-3p	WBGene00011735	hip-1	153	-12.31	none available
cel-miR-392-3p	WBGene00007024	plin-1	143	-14.57	none available
cel-miR-392-3p	WBGene00001196	egl-30	142	-15.46	egl-30 encodes an ortholog of the heterotrimeric G protein alpha subunit Gq (Gq/G11 class) that affects viability, locomotion, egg laying, synaptic transmission, and pharyngeal pumping; it genetically interacts with the goa-1 pathway, and is probably expressed ubiquitously, with highest expression in excitable cells.
cel-miR-392-3p	WBGene00004892	sms-1	140	-13.13	none available
cel-miR-392-3p	WBGene00006751	unc-11	145	-13.74	unc-11 encodes multiple isoforms of a clathrin-adaptor protein AP180 (OMIM:603025) that functions in clathrin-mediated endocytosis; UNC-11 is essential for embryogenesis, locomotion, and pharyngeal pumping, and regulates neurotransmitter release by controlling vesicle trafficking and fusion; UNC-11 is also required for localization of SNB-1/synaptobrevin to synaptic vesicles, thus acting as a sor…
cel-miR-392-3p	WBGene00006472	tag-123	140	-15.2	none available
cel-miR-392-3p	WBGene00022450	ubc-26	146	-15.51	none available
cel-miR-392-3p	WBGene00012559	epg-3	149	-12	none available
cel-miR-392-3p	WBGene00004075	pod-1	145	-20.55	The pod-1 gene encodes a coronin-like protein required for asymmetry along the anterior-posterior axis at the beginning of embryonic development.
cel-miR-392-3p	WBGene00004751	sea-2	145	-19.18	sea-2 encodes a zinc finger protein; SEA-2 is an autosomal signal element (ASE) that functions to interpret the X:A chromosomal ratio; in addition, SEA-2 functions autonomously in the intestine to regulate adult lifespan and autonomously in seam cells to regulate larval developmental timing; in regulating lifespan and developmental timing, SEA-2 functions as a post-transcriptional negative regula…
cel-miR-392-3p	WBGene00011146	pde-2	142	-11.84	none available
cel-miR-392-3p	WBGene00016611	bicd-1	140	-16.94	bicd-1 encodes the C. elegans homolog of Drosophila BicaudalD, a dynein regulator; in C. elegans, bicd-1 is an essential gene and is also required for hyp7 nuclear migrations; BICD-1 physically interacts with UNC-83 and EGAL-1, and thus likely functions as part of a dynein regulatory complex (that also includes DLC-1) that controls the directionality and extent of nuclear migrations; a bicd-1::GF…
cel-miR-392-3p	WBGene00010935	M163.1	145	-16.42	none available
cel-miR-392-3p	WBGene00000421	ced-7	140	-10.92	ced-7 encodes an ATP binding cassette (ABC) transporter that is a member of the ABCA subfamily of transporter proteins; CED-7 activity is required in both apoptotic and phagocytic cells for engulfment of apoptotic cell corpses; in regulating apoptotic cell clearance, CED-7 functions upstream of CED-10/Rac, and together with CED-1 and CED-6, to mediate actin reorganization around the apoptotic cel…
cel-miR-392-3p	WBGene00001439	fkh-7	149	-12.52	fkh-7 encodes one of 15 forkhead transcriptional regulators encoded by the C. elegans genome; by homology, FKH-7 is predicted to function as a transcription factor that regulates gene expression during development; however, as loss of fkh-7 activity via RNA-mediated interference (RNAi) does not result in any obvious abnormalities, the precise role of FKH-7 in C. elegans development and/or behavio…
cel-miR-392-3p	WBGene00008121	C46F11.6	149	-12.74	none available
cel-miR-392-3p	WBGene00003936	pat-12	141	-15.44	pat-12 encodes several isoforms containing a novel hemidesmosome component that has strong homology to antigen B20 from filarial nematode onchocerca volvulus, which partly protects different hosts against infection when used for immunization; PAT-12 activity is important to maintain FO integrity and might have distinct functions apically and basally based on differential loss of VAB-10A, CIFs and…
cel-miR-392-3p	WBGene00000894	dab-1	141	-16.39	dab-1 encodes an ortholog of the cytoplasmic adaptor protein DISABLED, required for normal molting and meiotic arrest; DAB-1 is also required for EGL-17 secretion from vulval cells, and thus indirectly for normal sex myoblast (SM) migration and egg-laying; DAB-1 contains a conserved PTB domain and signals that confer localization to Golgi-proximal vesicles, and DAB-1 localizes to vesicular struct…
cel-miR-242-5p	WBGene00016913	lam-2	140	-13.3	lam-2 encodes a laminin gamma subunit; lam-2 activity is required for embryonic development and for regulation of muscle arm extension; loss of lam-2 function via large-scale RNAi screens results in embryonic, larval, and adult lethality, sterility, body morphology defects, and abnormal locomotion.
cel-miR-242-5p	WBGene00004732	sax-7	141	-22.29	sax-7 encodes an ortholog of human L1CAM, and a paralog of lad-2; L1CAM is a member of the group of highly conserved transmembrane cell adhesion receptor molecules which belong to the immunuglobulin superfamily; SAX-7 is required for axon guidance, neurite outgrowth and maintenance of neuronal positioning through homophilic and heterophilic interactions; sax-7 also affects germline development, e…
cel-miR-242-5p	WBGene00001149	bcat-1	141	-13.17	bcat-1 encodes a branched-chain amino acid aminotransferase that, by homology, is predicted to catalyze the first reaction in the catabolism of essential branched-chain amino acids such as leucine, isoleucine, and valine; in C. elegans, large-scale RNA-mediated interference (RNAi) screens indicate that bcat-1 activity is required for embryonic and larval development.
cel-miR-242-5p	WBGene00003229	mex-3	140	-10.64	mex-3 encodes two KH domain-containing RNA binding proteins; in the early embryo, maternally provided MEX-3 is required for specifying the identities of the anterior AB blastomere and its descendants, as well as for the identity of the P3 blastomere and proper segregation of the germline P granules; mex-3 mRNA is distributed uniformly in the syncytial core of the adult distal gonad, mature oocyte…
cel-miR-242-5p	WBGene00006321	sup-12	141	-16.2	sup-12 encodes an RNA-binding protein that contains a conserved RNA recognition motif (RRM); during development, SUP-12 functions as a muscle-specific splicing factor to regulate alternative pre-mRNA processing of unc-60 and egl-15 transcripts; in vitro, SUP-12 can bind intronic regions of the unc-60 and egl-15 pre-mRNAs; specifically, SUP-12 binds the unc-60 intron 1A cooperatively with ASD-2, w…
cel-miR-242-5p	WBGene00004063	pmr-1	150	-14.37	The pmr-1 gene encodes a Golgi P-type ATPase Ca^2+/Mn^2+-pump; mutations in its human ortholog, ATP2C1, cause Hailey-Hailey disease (OMIM:169600).
cel-miR-270-5p	WBGene00000066	act-4	289	-37.92	act-4 encodes an actin isoform that is most similar to act-2 in amino acid sequence; an act-4 reporter gene is expressed in body wall and vulval muscles and the spermatheca.
cel-miR-270-5p	WBGene00000063	act-1	153	-18.29	act-1 encodes an actin isoform that is required for proper body wall muscle and pharyngeal muscle structures and the motility of animals; actins have highly similar amino acid sequences; ACT-1 is identical to ACT-3; act-1 functions redundantly with two other actin isoforms, act-2 and act-3, to control cytoplasmic microfilament function in the early embryo.
cel-miR-270-5p	WBGene00001137	eat-6	156	-12.78	eat-6 encodes an ortholog of the alpha subunit of a sodium/potassium ATPase, which in turn affects Na+,K(+)-ATPase activity of membranes by affecting the level of the phosphorylated intermediate of the Na+,K(+)-ATPase; EAT-6 affects relaxation of the pharyngeal muscles, fertility (and thus affects feeding); EAT-6 also affects body length, life span, and ASE, ASI and ASJ axonal outgrowth.
cel-miR-270-5p	WBGene00022089	Y69A2AR.18	142	-14.24	none available
cel-miR-270-5p	WBGene00016981	C56G2.7	161	-19.63	none available
cel-miR-270-5p	WBGene00011880	T21B6.3	141	-18.03	The protein product of this gene is predicted to contain a glutamine/asparagine (Q/N)-rich ("prion") domain, by the algorithm of Michelitsch and Weissman (as of the WS77 release of WormBase, i.e., in wormpep77).
cel-miR-270-5p	WBGene00008205	sams-1	140	-15.58	sams-1 encodes an S-adenosyl methionine synthetase; by homology, SAMS-1 is predicted to function as a methyl-group donor in many biochemical reactions; sams-1 expression levels are negatively regulated by dietary restriction (as seen in eat-2 mutant animals), suggesting that increased lifespan due to dietary restriction is due, in part, to reducing the activity of key metabolic enzymes; loss of s…
cel-miR-270-5p	WBGene00013682	Y105E8A.25	153	-14.09	none available
cel-miR-270-5p	WBGene00016977	akap-1	148	-17.62	none available
cel-miR-270-5p	WBGene00016509	adss-1	158	-23.79	none available
cel-miR-270-5p	WBGene00022069	eel-1	141	-17.55	eel-1 encodes a predicted Hect E3 ubiquitin ligase that contains multiple domains of similarity to the mammalian Mcl1 ubiquitin ligase Mule; eel-1 (enhancer of efl-1) was identified in a screen for modifiers of the transcription factor efl-1/E2F which is involved in the generation of SKN-1 protein asymmetry in the early embryo, a process essential for proper embryonic patterning; EEL-1 binds SKN-…
cel-miR-270-5p	WBGene00002202	kin-19	148	-16.53	kin-19 encodes a serine/threonine kinase orthologous to Casein Kinase I (CKI); in the early embryo, kin-19 is a component of both the non-canonical Wnt signaling pathway that regulates endoderm formation in the early embryo as well as the Wnt spindle orientation pathway; during larval development, kin-19 functions in a non-canonical Wnt signaling pathway to control asymmetric division and fate sp…
cel-miR-270-5p	WBGene00001149	bcat-1	150	-13.95	bcat-1 encodes a branched-chain amino acid aminotransferase that, by homology, is predicted to catalyze the first reaction in the catabolism of essential branched-chain amino acids such as leucine, isoleucine, and valine; in C. elegans, large-scale RNA-mediated interference (RNAi) screens indicate that bcat-1 activity is required for embryonic and larval development.
cel-miR-270-5p	WBGene00019726	bris-1	156	-17.6	none available
cel-miR-270-5p	WBGene00002196	kin-10	150	-17.08	kin-10 encodes a putative regulatory (beta) subunit of casein kinase II required for both viability and male mating behavior, the latter of which probably reflects activation of LOV-1 and PKD-2 by KIN-10; KIN-10 is orthologous to human CSNK2B (LY6G5B; OMIM:610433); a C-terminal domain of KIN-10 (residues 109-174) bind the PLAT domain of LOV-1 in two-hybrid and GST pulldown assays, and KIN-10 colo…
cel-miR-270-5p	WBGene00001088	dpy-30	141	-13.71	The dpy-30 gene encodes an essential nuclear protein required for hermaphrodite dosage compensation as well as normal male development; DPY-30 is expressed ubiquitously throughout development and can be detected in two different multiprotein complexes: the SDC complex involved in dosage compensation and a second complex containing NOX-1 (a WD repeat-containing protein) and ASH-2 (a trithorax-rela…
cel-miR-270-5p	WBGene00015752	C14B9.2	153	-18.42	C14B9.2 encodes a protein disulfide isomerase; by homology, the product of C14B9.2 is predicted to function in oxidative protein folding in the endoplasmic reticulum (ER); C14B9.2 transcript levels are increased in response to ER stress.
cel-miR-270-5p	WBGene00020738	T23F2.5	147	-13.03	none available
cel-miR-270-5p	WBGene00019628	pup-2	142	-11.07	pup-2 encodes a template-independent poly(U) polymerase with 3"" end RNA substrates, orthologous to human ZCCHC6 and ZCCHC11, and paralogous to CID-1; like its paralog CID-1, PUP-2 is required for normally rapid growth and normally short lifespan; pup-2(RNAi) animals are slow-growing and abnormally long-lived; PUP-2 is paralogous to the GLD-2 family of poly(A) polymerases.
cel-miR-270-5p	WBGene00022749	ZK484.3	140	-16.88	none available
cel-miR-270-5p	WBGene00001441	fkh-9	142	-17.59	fkh-9 encodes a member of the forkhead domain transcription factor family.
cel-miR-270-5p	WBGene00017814	F26A10.2	142	-14.87	F26A10.2 encodes a protein with four zinc-finger domains and a glutamine/asparagine-rich domain, that is required for maintenance of the germline and for locomotion; F26A10.2(RNAi) animals are uncoordinated and have sterile progeny.
cel-miR-270-5p	WBGene00014115	gld-4	145	-19.36	gld-4 encodes a noncanonical poly(A) polymerase orthologous to Saccharomyces cerevisiae Trf4/5p; GLD-4 activity is required for early meiotic progression of male and female gametes in the absence of GLD-2 and for regulation of gld-1 mRNA levels; GLD-4 physically interacts with GLS-1 which stimulates GLD-4 poly(A) polymerase activity in vivo; GLD-4 is expressed predominantly in germ cells and loca…
cel-miR-270-5p	WBGene00011528	T06D8.7	147	-25.07	none available
cel-miR-270-5p	WBGene00010935	M163.1	140	-15.55	none available
cel-miR-270-5p	WBGene00000566	cnt-2	146	-12.03	cnt-2 encodes an Arf GTPase-activating protein (GAP) of the AGAP family; cnt-2 is required for asymmetric cell divisions; genetic analyses suggest that cnt-2 influences asymmetric cell divisions through regulation of receptor-mediated endocytosis and regulation of actomyosin dynamics at the cell cortex.
cel-miR-270-5p	WBGene00008439	mfb-1	148	-15.11	This gene encodes a protein containing an F-box, a motif predicted to mediate protein-protein interactions either with homologs of yeast Skp-1p or with other proteins.
cel-miR-270-5p	WBGene00011230	nud-2	155	-17.33	nud-2 encodes an ortholog of human NDE1 and NDEL1, effectors of LIS1; NUD-2, along with other orthologs of LIS1-associated proteins (NUD-1, DHC-1, CDK-5, and CDKA-1), is required to prevent convulsions induced by exposure to the GABA antagonist pentylenetetrazole (PTZ); nud-2(RNAi), like RNAi of nud-1 et al., not only induces PTZ susceptibility but also causes GABA-containing synaptic vesicles in…
cel-miR-4937-5p	WBGene00019322	ahcy-1	145	-24.23	ahcy-1 encodes the C. elegans S-adenosylhomocysteine hydrolase (SAHH) ortholog; by homology, AHCY-1 is predicted to catalyze the hydrolysis of S-adenosyl-L-homocysteine to adenosine and L-homocysteine; loss of ahcy-1 activity via RNAi results in embryonic and larval lethality, abnormal body morphology, sick animals, and uncoordinated locomotion; Northern blot analyses indicate the ahcy-1 mRNA is …
cel-miR-4937-5p	WBGene00015248	mai-2	143	-27.87	mai-2/B0546.1 is orthologous to mitochondrial intrinsic ATPase inhibitor protein (IF(1)), which blocks reverse action (ATP hydrolysis) by F(0)F(1)-ATPase when its (normally required) proton gradient is lost; MAI-2 has a mitochondrial import signal at its N-terminus, and is transported to yeast mitochondria; MAI-2 can inhibit yeast F(0)F(1)-ATPase, and this inhibition is pH-dependent; MAI-2"s tert…
cel-miR-4937-5p	WBGene00011304	mnk-1	144	-22.16	mnk-1 encodes the C. elegans ortholog of the Mnk MAP kinase-interacting kinase
cel-miR-4937-5p	WBGene00004336	ret-1	159	-22.91	none available
cel-miR-4937-5p	WBGene00002247	lam-1	140	-26.9	lam-1 encodes a laminin beta that affects degenerin-induced cell death and is required redundantly with lam-2 for morphogenesis.
cel-miR-4937-5p	WBGene00001502	ftt-2	166	-26.05	ftt-2 encodes a 14-3-3 protein; FTT-2 is required for regulating the localization of the product of YAP-1, a Yes-associated protein (Yap) homolog, between the cytoplasm and the nucleus.
cel-miR-4937-5p	WBGene00019947	htz-1	144	-27.01	htz-1 encodes the C. elegans ortholog of the H2A.Z histone variant; htz-1 is an essential gene and during development, HTZ-1 functions with the PHA-4/FoxA transcription factor and the MYS-1/TIP60-SSL-1/SWR1 remodeling complex to regulate gene expression during pharyngeal (foregut) organogenesis; a YFP::HTZ-1 fusion protein localizes to pharyngeal gene promoters at the onset of transcription, in a…
cel-miR-4937-5p	WBGene00022211	Y73B3A.9	141	-19.96	none available
cel-miR-4937-5p	WBGene00003559	ncl-1	294	-42.51	ncl-1 encodes a cytoplasmic B-box zinc finger protein that negatively regulates rRNA and 5S RNA transcription, nucleolus size, and body size; NCL-1 is orthologous to Drosophila BRAIN TUMOR (BRAT), and ncl-1 mutants can be rescued by brat transgenes; NCL-1 is required for the normally small size of neuronal, muscle, and hypodermal nucleoli, and is already active in 4-cell embryos; NCL-1 may be a r…
cel-miR-4937-5p	WBGene00000912	daf-16	140	-16.72	daf-16 encodes the sole C. elegans forkhead box O (FOXO) homologue; DAF-16 functions as a transcription factor that acts in the insulin/IGF-1-mediated signaling (IIS) pathway that regulates dauer formation, longevity, fat metabolism, stress response, and innate immunity; DAF-16 regulates these various processes through isoform-specific expression, isoform-specific regulation by different AKT kina…
cel-miR-4937-5p	WBGene00004905	snf-6	148	-26.61	snf-6 encodes a member of the sodium:neurotransmitter symporter family.
cel-miR-4937-5p	WBGene00022037	acs-13	142	-25	none available
cel-miR-4937-5p	WBGene00001745	gsa-1	140	-19.61	The gsa-1 gene encodes a Gs alpha subunit of heterotrimeric G proteins which affects L1 larval stage viability, movement, and egg laying; it is genetically upstream of sgs-1 with respect to neuronal degeneration, as defined by gain-of-function analysis, and is expressed in excitable cells.
cel-miR-4937-5p	WBGene00007696	tram-1	290	-52.71	tram-1 encodes the C. elegans ortholog of translocating chain-associated membrane protein 1; by homology, TRAM-1 is predicted to function in translocation of protein across the endoplasmic reticulum membrane; TRAM-1 localizes to the rough endoplasmic reticulum (ER) as well as to post-ER compartments such as the ciliary base.
cel-miR-4937-5p	WBGene00001971	hmg-1.1	146	-17.49	hmg-1.1 encodes a member of the high mobility group (HMG) family of proteins.
cel-miR-4937-5p	WBGene00007058	dmd-6	289	-48	none available
cel-miR-4937-5p	WBGene00012557	Y37D8A.19	144	-19.04	none available
cel-miR-4937-5p	WBGene00017675	F21F3.6	146	-23.23	none available
cel-miR-4937-5p	WBGene00000793	crh-1	162	-22.74	crh-1 encodes a homolog of the cyclic AMP-response element binding protein (CREB); crh-1 is involved in the transcription of CRE-sequence dependant genes activated by a CaM kinase cascade; crh-1 is required in the bilateral thermosensory neuron AFD, for a memory-related behaviour and for response to tap (nonlocalized mechanosensory stimulation) and tap habituation; crh-1 appears to be ubiquitousl…
cel-miR-4937-5p	WBGene00020097	larp-1	140	-27.67	larp-1 encodes an La-related protein containing an La RNA-binding motif and a conserved LARP1 domain; loss of larp-1 activity results in defective oogenesis, which is suppressed by loss of function mutations in Ras-MAPK signaling components, suggesting that in the germline, LARP-1 functions to negatively regulate Ras-MAPK pathway activity; as LARP-1 binds RNA homopolymers in vitro and larp-1 muta…
cel-miR-4937-5p	WBGene00004266	rab-1	147	-20.34	rab-1 encodes an ortholog of the small Ras-like GTPase Rab1; by homology, RAB-1 is predicted to play a role in intracellular vesicle trafficking, and consistent with this broad role, large-scale RNAi screens indicate that rab-1 activity is required for fertility, movement, and survival; in yeast two-hybrid assays, RAB-1 interacts with TIR-1, a C. elegans SARM ortholog that is required for innate …
cel-miR-4937-5p	WBGene00003916	par-1	152	-25.11	par-1 encodes a serine-threonine kinase; maternally provided PAR-1 is essential for establishing early embryonic polarity; PAR-1 is present in the cytoplasm and in the cell cortex and asymmetrically localized to the posterior cortex of late one-cell stage embryos; PAR-1 is continuously asymmetrically localized to the P lineage (germline blastomeres) at each subsequent division, and evenly distrib…
cel-miR-4937-5p	WBGene00018701	pccb-1	150	-20.42	F52E4.1 is orthologous to the human gene PROPIONYL-CoA CARBOXYLASE, BETA SUBUNIT (PCCB; OMIM:232050), which when mutated leads to propionicacidemia; F52E4.1 protein is predicted to be mitochondrial.
cel-miR-4937-5p	WBGene00010697	uda-1	140	-17.35	none available
cel-miR-4937-5p	WBGene00010790	sodh-1	143	-19.62	none available
cel-miR-4937-5p	WBGene00007054	scpl-1	140	-21.73	scpl-1 encodes, by alternative splicing, two protein isoforms of a putative class-C RNA polymerase II (RNAPII) carboxyl-terminal domain (CTD) phosphatase, orthologous to budding yeast PSR1 and PSR2 and human CTDSP1 (OMIM:605323), CTDSP2 (OMIM:608711, amplified in sarcoma), and CTDSPL (OMIM:608592, deleted in epithelial cancer), and paralogous to C. elegans SCPL-3 and human CTDSPL2; more distantly…
cel-miR-4937-5p	WBGene00001089	dre-1	151	-19.13	dre-1 encodes an ortholog of human FBXO11/PRMT9 (OMIM:607871, associated with vitiligo and otitis media) that is required, in conjunction with DAF-12 and its partners, for global developmental timing of the transistion from larval to adult cell fates; DRE-1 has an N-terminal F-box domain, three central tandem C-terminal CASH domains, and a C-terminal zinc finger; hypomorphic dre-1 mutations are s…
cel-miR-4937-5p	WBGene00001196	egl-30	150	-24.44	egl-30 encodes an ortholog of the heterotrimeric G protein alpha subunit Gq (Gq/G11 class) that affects viability, locomotion, egg laying, synaptic transmission, and pharyngeal pumping; it genetically interacts with the goa-1 pathway, and is probably expressed ubiquitously, with highest expression in excitable cells.
cel-miR-4937-5p	WBGene00001488	frm-1	144	-20.97	none available
cel-miR-4937-5p	WBGene00012351	W09C5.1	155	-19.61	none available
cel-miR-4937-5p	WBGene00022286	rga-4	281	-45.47	rga-4 encodes a GTPase-activating protein (GAP); RNAi experiments predicted to target rga-4 and the related rga-3 gene result in early embryonic defects, specifically defects in cortical contractility, non-muscle myosin NMY-2 distribution, and the relative size of PAR protein domains; in vitro, RGA-4 positively regulates RHO-1 GTPase activity, consistent with genetic studies showing that the rga-…
cel-miR-4937-5p	WBGene00003144	max-2	437	-82.02	max-2 encodes, by alternative splicing, at least two isoforms of a putative p21-activated kinase that is required (redundantly with its paralog, PAK-1) for normal axonal guidance of motoneurons, P cell migration, and locomotion, with max-2(cy2);pak-1(ok448) double mutants phenotypically resembling unc-73 or ced-10;mig-2 mutants; max-2 is expressed ubiquitously in early embryos, then localizes to …
cel-miR-4937-5p	WBGene00012435	flh-1	144	-29.41	none available
cel-miR-4937-5p	WBGene00002190	kin-2	163	-32.38	kin-2 encodes a predicted regulatory subunit of a cAMP-dependent protein kinase that may act downstream of, or in parallel to, ric-8.
cel-miR-4937-5p	WBGene00019347	mbl-1	152	-17.67	mbl-1 encodes, by alternative splicing, two isoforms of a putative MUSCLEBLIND-type mRNA splicing regulator required in adults for normal muscle dense body organization, locomotion, and vulval morphogenesis; MBL-1 is orthologous to Drosophila MBL and human MBNL1 (OMIM:606516), MBNL2 (OMIM:607327), and MBNL3 (OMIM:300413); mbl-1 is transcribed in larvae and adults; mbl-1(RNAi) animals show protrud…
cel-miR-4937-5p	WBGene00006820	unc-89	147	-27.01	unc-89 encodes several protein isoforms variably characterized by the presence or absence of SH3, DH, PH, immunoglobulin and myosin light chain kinase (MLCK)-like protein kinase domains; during development, unc-89 is required for proper organization of A bands in striated muscle and thus for fully normal locomotion, pharyngeal muscle contractions, and body size; unc-89 is expressed in body wall m…
cel-miR-4937-5p	WBGene00001595	gld-1	296	-40.71	gld-1 encodes a protein containing a K homology (KH) RNA binding domain; GLD-1 is required for regulation of the mitosis/meiosis decision during germline development (promotion of meiotic entry) in parallel with gld-2, gld-3, and nos-3 and also affects spermatogenesis; GLD-1 physically interacts with the 3"- and 5"UTR of its putative mRNA targets in vitro to negatively regulate their translation;…
cel-miR-4937-5p	WBGene00019001	ipgm-1	143	-27.21	ipgm-1 encodes an experimentally confirmed cofactor-independent phosphoglycerate mutase that is essential for embryonic and larval viability, and for normal body morphology; paradoxically, ipgm-1 is also required for normally short lifespan (in mass RNAi screens for Age phenotypes); IPGM-1 exhibits phosphoglycerate mutase activity when expressed in vitro; ipgm-1 is expressed widely in larvae and …
cel-miR-4937-5p	WBGene00020507	vha-15	290	-47.08	vha-15 encodes an ortholog of subunit H of the cytoplasmic (V1) domain of vacuolar proton-translocating ATPase (V-ATPase); VHA-15 and VHA-18 are co-orthologs; VHA-15, along with VHA-2 and probably all V-ATPase subunits, is required for systemic RNAi, probably during endocytotic RNAi uptake; VHA-15 is a predicted cytosolic stator (stalk) component; neurons).
cel-miR-4937-5p	WBGene00007016	mdt-15	147	-25.26	mdt-15 encodes, by alternative splicing, two isoforms of a Mediator subunit orthologous to human MED15 (OMIM:607372, deleted in DiGeorge syndrome); together with NHR-49 and SBP-1, MDT-15 is required for normal fat accumulation, for expression of fatty acid (FA) desaturase genes (fat-5, fat-6, and fat-7), for normal levels of mono- and polyunsaturated FAs (PUFAs), and for viability, fecundity, mob…
cel-miR-4937-5p	WBGene00016162	crh-2	140	-22.08	none available
cel-miR-4937-5p	WBGene00004268	rab-5	142	-20.33	rab-5 encodes the C. elegans Rab5 GTPase ortholog; RAB-5 activity is required for receptor-mediated yolk endocytosis and for phagosome maturation involved in apoptotic cell clearance; rab-5 mutations also affect localization of P granules and PAR-2, as well as the cytoplasmic appearance of cells in the early embryo and larval development; RAB-5 localizes to early endosomes and maturing phagosomes.
cel-miR-4937-5p	WBGene00004897	snb-1	143	-24.85	The snb-1 gene encodes synaptobrevin, a synaptic vesicle protein orthologous to human vesicle-associated membrane protein 1 (VAMP1 OMIM:185880) and 2 (VAMP2 OMIM:185881), and is required for viability and synaptic transmission; SNB-1 is likely to play a role in vesicle docking and/or fusion and is expressed in neurons where it colocalizes with synaptic vesicle proteins RAB-3 and synaptotagmin.
cel-miR-4937-5p	WBGene00014115	gld-4	141	-16.49	gld-4 encodes a noncanonical poly(A) polymerase orthologous to Saccharomyces cerevisiae Trf4/5p; GLD-4 activity is required for early meiotic progression of male and female gametes in the absence of GLD-2 and for regulation of gld-1 mRNA levels; GLD-4 physically interacts with GLS-1 which stimulates GLD-4 poly(A) polymerase activity in vivo; GLD-4 is expressed predominantly in germ cells and loca…
cel-miR-4937-5p	WBGene00009082	dlat-1	167	-30.12	F23B12.5 is orthologous to the human gene DIHYDROLIPOAMIDE DEHYDROGENASE (DLD; OMIM:109720), which when mutated leads to lactic acidosis due to lipoamide dehydrogenase deficiency.
cel-miR-4937-5p	WBGene00008183	rin-1	143	-21.01	none available
cel-miR-4937-5p	WBGene00016158	ari-1	142	-22.05	none available
cel-miR-4937-5p	WBGene00009285	F31C3.3	144	-21.8	none available
cel-miR-4937-5p	WBGene00000376	ccr-4	141	-20.66	none available
cel-miR-4937-5p	WBGene00006321	sup-12	147	-17.82	sup-12 encodes an RNA-binding protein that contains a conserved RNA recognition motif (RRM); during development, SUP-12 functions as a muscle-specific splicing factor to regulate alternative pre-mRNA processing of unc-60 and egl-15 transcripts; in vitro, SUP-12 can bind intronic regions of the unc-60 and egl-15 pre-mRNAs; specifically, SUP-12 binds the unc-60 intron 1A cooperatively with ASD-2, w…
cel-miR-4937-5p	WBGene00003903	pab-2	140	-23.11	pab-2 encodes a polyadenylate-binding protein 1 homolog with high similarity to human PABP 1.
cel-miR-4937-5p	WBGene00012730	xrn-1	141	-18.31	xrn-1 encodes a 5"-3" exoribonuclease that is orthologous to Saccharomyces cerevisiae Xrnp1, a key component of the yeast 5"-3" mRNA degradation pathway; in C. elegans, XRN-1 activity is required during embryogenesis for completion of ventral enclosure, the morphogenetic process whereby the ventral epithelial cells cover and seal the interior cells of the embryo; in addition, XRN-1 also plays a r…
cel-miR-4937-5p	WBGene00006786	unc-51	144	-26.15	unc-51 encodes a serine/threonine protein kinase orthologous to Saccharomyces cerevisiae autophagy protein Atg1p and the vertebrate ULK proteins; unc-51 is required for axon outgrowth along the anterior-posterior axis and sex myoblast migration; in regulating axon outgrowth, UNC-51 functions together with the VAB-8 kinesin-like protein and UNC-14, both of which physically interact with, and are p…
cel-miR-4937-5p	WBGene00000393	cdf-1	152	-20.32	cdf-1 encodes a protein similar to members of the cation diffusion facilitator (CDF) family of transmembrane proteins and is most similar to vertebrate ZnT-1; two other elegans CDF proteins, cdf-2 and sur-7 have also been identified; CDF proteins regulate the transport of heavy metal ions like zinc; cdf-1 positively regulates Ras-mediated signaling during vulval development, most likely by promot…
cel-miR-4937-5p	WBGene00001560	gei-3	147	-23.86	gei-3 encodes a member of the high mobility group (HMG) protein family; interacts with GEX-3 in yeast two-hybrid assays.
cel-miR-4937-5p	WBGene00007624	hrde-1	141	-18.55	none available
cel-miR-4937-5p	WBGene00015301	C01F1.6	146	-27.26	none available
cel-miR-4937-5p	WBGene00017699	flcn-1	147	-18.67	F22D3.2 encodes an ortholog of human folliculin (OMIM:607273, mutated in Birt-Hogg-Dube syndrome).
cel-miR-4937-5p	WBGene00010405	erfa-3	140	-20.65	none available
cel-miR-4937-5p	WBGene00001510	fzr-1	142	-24.86	fzr-1 encodes a WD repeat-containing protein homologous to Cdh1/Hct1/FZR (OMIM:603619), a regulatory subunit of the anaphase-promoting complex/cyclosome (APC/C) required for anaphase initiation and exit from mitosis; FZR-1 is required for fertility, and also functions redundantly with lin-35/Rb to for normal embryogensis and control of postembryonic cell proliferation; FZR-1 probably regulates th…
cel-miR-4937-5p	WBGene00012988	ztf-22	156	-20.93	none available
cel-miR-4937-5p	WBGene00006996	zyg-11	142	-21.55	zyg-11 encodes a protein containing four diverged leucine-rich repeats and an armadillo-like helical domain and is conserved in metazoa, but not found in Drosophila; during development, ZYG-11 functions as the substrate-recognition subunit for a CUL-2-based ubiquitin-ligase complex that is required for a number of biological processes including progression through meiotic anaphase II, mitotic chr…
cel-miR-793-5p	WBGene00010557	mspn-1	141	-13.93	none available
cel-miR-793-5p	WBGene00002280	let-2	141	-11.1	let-2 encodes an alpha-2 type IV collagen, probably most closely equivalent to the human gene COL4A2 (OMIM:120090) on the basis of biological function; LET-2 is required for embryonic development and is a component of the basement membrane between muscle and hypodermis; LET-2 interacts with UNC-105, a mechanosensory ion channel of the degenerin ion channel superfamily that is expressed in muscle …
cel-miR-793-5p	WBGene00001423	fib-1	148	-11.49	fib-1 encodes the C. elegans ortholog of fibrillarin and Saccharomyces cerevisiae Nop1p, an essential component of the U3 SnoRNP; FIB-1 localizes to the nucleolus.
cel-miR-793-5p	WBGene00019466	tos-1	153	-11.27	none available
cel-miR-793-5p	WBGene00001635	gly-10	140	-12.81	none available
cel-miR-793-5p	WBGene00000779	cpn-3	142	-15	cpn-3 encodes a calponin homolog, most closely related to its paralog CPN-4 in C. elegans; CPN-3 is more similar to the calponin paralogs transgelin (SM22 alpha) or neuronal protein NP25 than to calponin per se.
cel-miR-793-5p	WBGene00000067	act-5	140	-15.79	act-5 encodes an ortholog of human cytoplasmic actin; act-5 is required for formation of the terminal web and microvilli on the apical surface of intestinal cells; act-5 also plays a role in mediating non-lytic exit of intracellular parasites from the intestine; act-5 is expressed only in intestinal cells and in the excretory cell; in the intestine, ACT-5 localizes to microvilli and the terminal …
cel-miR-793-5p	WBGene00019947	htz-1	145	-14.31	htz-1 encodes the C. elegans ortholog of the H2A.Z histone variant; htz-1 is an essential gene and during development, HTZ-1 functions with the PHA-4/FoxA transcription factor and the MYS-1/TIP60-SSL-1/SWR1 remodeling complex to regulate gene expression during pharyngeal (foregut) organogenesis; a YFP::HTZ-1 fusion protein localizes to pharyngeal gene promoters at the onset of transcription, in a…
cel-miR-793-5p	WBGene00003915	pan-1	147	-15.43	pan-1 encodes a novel predicted transmembrane protein with extracellular leucine-rich repeats; loss of PAN-1 activity via RNAi results in molting defects and arrested L2-sized larvae, indicating that PAN-1 is required for completion of the larval molts; pan-1 expression is enriched in the germline and upregulated in animals mutant for unc-95, which encodes a LIM domain-containing protein that loc…
cel-miR-793-5p	WBGene00022235	sqd-1	141	-12.26	none available
cel-miR-793-5p	WBGene00006779	unc-43	140	-10.71	unc-43 encodes the C. elegans ortholog of type II calcium/calmodulin-dependent protein kinase (CaMKII); unc-43 activity is required for a number of processes, including locomotion, neuronal cell fate specification and regulation of synaptic density, egg laying, defecation, and meiotic maturation; in regulating some of these processes, unc-43 acts in concert with MAPKKK and G protein signaling pat…
cel-miR-793-5p	WBGene00004143	pqn-59	142	-11.07	pqn-59 encodes a protein containing a glutamine/asparagine (Q/N)-rich domain and similarity to the vertebrate ubiquitin-associated proteins UBAP2 and UBAP2L; microarray experiments indicate that pqn-59 is expressed maternally and embryonically and in situ hybridization studies show that pqn-59 mRNA exhibits strong germline expression; loss of pqn-59 activity via RNAi in a wild-type background res…
cel-miR-793-5p	WBGene00000912	daf-16	159	-11.37	daf-16 encodes the sole C. elegans forkhead box O (FOXO) homologue; DAF-16 functions as a transcription factor that acts in the insulin/IGF-1-mediated signaling (IIS) pathway that regulates dauer formation, longevity, fat metabolism, stress response, and innate immunity; DAF-16 regulates these various processes through isoform-specific expression, isoform-specific regulation by different AKT kina…
cel-miR-793-5p	WBGene00006807	unc-75	140	-12.78	unc-75 encodes an RNA-binding protein with two N-terminal RNA recognition motifs (RRMs), a glutamine/asparagine-rich linker domain, and a third C-terminal RRM that is orthologous to the mammalian CELF/BrunoL proteins that control pre-mRNA splicing; UNC-75 is required for neuron-specific splicing of unc-32 mRNA; UNC-75 binds the unc-32 intron 7a in vitro; both UNC-75 and EXC-7 are required in para…
cel-miR-793-5p	WBGene00013766	prmt-1	147	-15.58	prmt-1 encodes a type I protein arginine methyltransferase; in C. elegans, PRMT-1 positively regulates adult lifespan and is required for stress response and fat storage in the absence of DAF-2-mediated signaling; PRMT-1 is also required for proper development of myofilament structure; PRMT-1 physically interacts with, and methylates, DAF-16 thereby preventing its phosphorylation and cytoplasmic …
cel-miR-793-5p	WBGene00003891	osm-11	151	-16.61	osm-11 encodes a protein required for normal osmosensation, osmotic resistance, and defecation rhythm, and for fully normal growth rate; OSM-11 has no clear orthologs outside of nematodes, but is paralogous to DOS-1, OSM-7, and K02F3.7, has a predicted signal sequence with 12 conserved cysteine residues, and may be secreted; osm-11 mutants have abnormally high levels of internal glycerol, defecti…
cel-miR-793-5p	WBGene00001173	egl-4	144	-13.13	egl-4 encodes a cyclic GMP-dependent protein kinase that may act through the TGF-beta signaling pathway to relay sensory cues that modulate chemosensory behavior, dauer formation, foraging, egg laying, body size, and endoreduplication in response to dietary restriction; egl-4 is also required for lethargus, a sleep-like state that is induced before each of the four larval molts; in addition, gene…
cel-miR-793-5p	WBGene00010681	mak-1	144	-12.08	none available
cel-miR-793-5p	WBGene00002191	kin-3	141	-16.16	kin-3 encodes an ortholog of the catalytic subunit of casein kinase II alpha, which in Drosophila and mammals is required for normal circadian rhythms, and which directly phosphorylates the Drosophila PERIOD protein (which itself regulates circadian rhythms); by analogy, KIN-3 might be expected to help regulate heterochronic functions dependent on such proteins as LIN-42.
cel-miR-793-5p	WBGene00012929	rsks-1	142	-10.17	rsks-1 encodes a putative ribosomal protein S6 kinase (S6K) required additively with IFG-1 for normally high levels of protein synthesis, and for normally short lifespan; RSKS-1"s effect on lifespan is independent of DAF-16, ISP-1, and SIR-2.1, and does not correlate with juglone resistance, but does correlate with abnormally high resistance to starvation and (perhaps) thermotolerance; RSKS-1 is …
cel-miR-793-5p	WBGene00021227	mct-1	141	-13.12	none available
cel-miR-793-5p	WBGene00002202	kin-19	148	-15.35	kin-19 encodes a serine/threonine kinase orthologous to Casein Kinase I (CKI); in the early embryo, kin-19 is a component of both the non-canonical Wnt signaling pathway that regulates endoderm formation in the early embryo as well as the Wnt spindle orientation pathway; during larval development, kin-19 functions in a non-canonical Wnt signaling pathway to control asymmetric division and fate sp…
cel-miR-793-5p	WBGene00016250	hsp-110	159	-11.13	C30C11.4 encodes a member of the Hsp70 family of heat shock proteins; loss of C30C11.4 activity via large-scale RNAi screens results in a variety of defects including embryonic and larval lethality, slow growth rates, and locomotory and morphological defects; in addition loss of C30C11.4 has been reported to result in a small but reproducible reduction in adult lifespan in otherwise long-lived an…
cel-miR-793-5p	WBGene00015273	mct-2	141	-13.12	none available
cel-miR-793-5p	WBGene00002363	let-92	150	-13.49	let-92 encodes a homolog of PP2AC, the catalytic subunit of protein phosphatase 2A (PP2A); let-92 was identified genetically in screens for essential genes on chromosome IV; LET-92 may regulate a number of signal transduction pathways as it is required for embryogenesis, larval development, Ras-mediated vulval development, and axonal guidance in the DD and VD neurons; let-92 interacts genetically…
cel-miR-793-5p	WBGene00006331	sup-26	140	-9.48	sup-26 encodes an RRM domain-containing protein; SUP-26 functions in somatic sex determination via negative regulation of tra-2 translation; SUP-26 binds the tra-2 28-nucleotide repeat element known as the TRA-2/GLI element (TGE), which is located in tra-2 3";untranslated region (UTR); SUP-26 physically interacts with the poly(A)-binding protein PAB-1, suggesting that it may control tra-2 transla…
cel-miR-793-5p	WBGene00017016	snap-1	146	-9.79	none available
cel-miR-793-5p	WBGene00003955	pcn-1	146	-11.68	pcn-1 encodes the C. elegans ortholog of proliferating cell nuclear antigen (PCNA), an acidic protein that is an essential component of the DNA replication and repair machinery and serves as a processivity factor for DNA polymerase delta; PCN-1 is required for early embryogenesis and for proper germ-line development, and directly interacts with CKI-2, a cyclin-dependent kinase inhibitor homolog t…
cel-miR-793-5p	WBGene00001320	ent-1	160	-13.12	ent-1 encodes a predicted equilibrative nucleoside transporter 1 that affects growth.
cel-miR-793-5p	WBGene00010701	ent-2	152	-14.19	none available
cel-miR-793-5p	WBGene00007135	cdk-12	140	-8.4	none available
cel-miR-793-5p	WBGene00004804	skn-1	156	-12.83	skn-1 encodes a bZip transcription factor orthologous to the mammalian Nrf (Nuclear factor-erythroid-related factor) transcription factors; during early embryogenesis, maternally provided SKN-1 is required for specification of the EMS blastomere, a mesendodermal precursor that gives rise to pharyngeal, muscle, and intestinal cells; later, during postembryonic development, SKN-1 functions in the p…
cel-miR-793-5p	WBGene00003826	ntl-3	147	-9.15	ntl-3 is the ortholog of NOT3/NOT5, a member of a protein complex also predicted to contain ccf-1/Y56A3A.20 (CAF1/POP2); ntl-3 is required for embryonic viability in mass RNAi assays.
cel-miR-793-5p	WBGene00012216	W02D9.10	150	-14.54	none available
cel-miR-793-5p	WBGene00004134	myrf-1	143	-11.07	myrf-1 encodes a protein with a glutamine/asparagine-rich domain, orthologous to human MYRF (myelin regulatory factor); in C. elegans, MYRF-1 activity is required for regulation of the molting cycle, specifically the completion of larval molts and cessation of molting in reproductively mature adult animals; a MYRF-1::GFP fusion protein is expressed in a wide variety of cells and tissues, includin…
cel-miR-793-5p	WBGene00020507	vha-15	147	-16.24	vha-15 encodes an ortholog of subunit H of the cytoplasmic (V1) domain of vacuolar proton-translocating ATPase (V-ATPase); VHA-15 and VHA-18 are co-orthologs; VHA-15, along with VHA-2 and probably all V-ATPase subunits, is required for systemic RNAi, probably during endocytotic RNAi uptake; VHA-15 is a predicted cytosolic stator (stalk) component; neurons).
cel-miR-793-5p	WBGene00007016	mdt-15	151	-16.84	mdt-15 encodes, by alternative splicing, two isoforms of a Mediator subunit orthologous to human MED15 (OMIM:607372, deleted in DiGeorge syndrome); together with NHR-49 and SBP-1, MDT-15 is required for normal fat accumulation, for expression of fatty acid (FA) desaturase genes (fat-5, fat-6, and fat-7), for normal levels of mono- and polyunsaturated FAs (PUFAs), and for viability, fecundity, mob…
cel-miR-793-5p	WBGene00000898	daf-2	147	-8.89	daf-2 encodes a receptor tyrosine kinase that is the C. elegans insulin/IGF receptor ortholog; DAF-2 activity is required for a number of processes in C. elegans, including embryonic and larval development, formation of the developmentally arrested dauer larval stage (diapause), larval developmental timing, adult longevity, reproduction, fat storage, salt chemotaxis learning, and stress resistanc…
cel-miR-793-5p	WBGene00005077	src-1	143	-17.92	src-1 encodes a non-receptor tyrosine kinase; during embryonic development, src-1 functions together with a Wnt signaling pathway to specify endodermal cell fate and division orientation of the EMS blastomere; src-1 also functions in an unc-5-mediated pathway to regulate cell and axon migration; SRC-1 physically interacts with UNC-5; src-1 also functions in the engulfing cell during cell corpse e…
cel-miR-793-5p	WBGene00006436	ttn-1	142	-16.85	ttn-1, through multiple splicing, encodes at least six protein isoforms that are orthologs of titin (OMIM:188840, mutated in cardiomyopathy or tibial muscular dystrophy), with the three largest isoforms being 2.2 MDa, 1.2 MDa and 301 kDa; TTN-1 isoforms are expressed in body wall and vulval muscle, localized to the centers of I-bands, with the two largest isoforms expressed in all muscles except …
cel-miR-793-5p	WBGene00004241	puf-5	141	-13.22	puf-5 encodes a Pumilio protein; PUF-5 is required, redundantly with PUF-6/7, for translational repression of glp-1 mRNA in oocytes (via specific elements in the 3" UTR site), and for normal oocyte maturation (growth, organization, nuclear enlargement, yolk uptake, and localization of RME-2 to the plasma membrane) and early embryogenesis (cell divisions and eggshell formation); since glp-1 mutati…
cel-miR-793-5p	WBGene00010935	M163.1	150	-15.46	none available
cel-miR-793-5p	WBGene00010868	somi-1	141	-12.27	none available
cel-miR-793-5p	WBGene00000421	ced-7	140	-11.27	ced-7 encodes an ATP binding cassette (ABC) transporter that is a member of the ABCA subfamily of transporter proteins; CED-7 activity is required in both apoptotic and phagocytic cells for engulfment of apoptotic cell corpses; in regulating apoptotic cell clearance, CED-7 functions upstream of CED-10/Rac, and together with CED-1 and CED-6, to mediate actin reorganization around the apoptotic cel…
cel-miR-793-5p	WBGene00000376	ccr-4	147	-18.71	none available
cel-miR-793-5p	WBGene00219271	F36H5.14	140	-13.9	none available
cel-miR-793-5p	WBGene00003618	nhr-19	159	-14.5	none available
cel-miR-793-5p	WBGene00011953	ppm-2	144	-11.95	none available
cel-miR-793-5p	WBGene00007317	C05A9.2	144	-13.23	none available
cel-miR-793-5p	WBGene00011662	T09F3.2	141	-16.37	none available
cel-miR-793-5p	WBGene00006975	zfp-1	154	-15.14	zfp-1 encodes a leucine zipper, zinc finger, and PHD/LAP domain (plant homeodomain/leukemia-associated protein)-containing protein homologous to human AF10 (OMIM:602409, which is involved in chromosomal translocations associated with acute leukemia); loss of zfp-1 activity via RNA-mediated interference (RNAi) results in suppression of RNAi, suggesting that ZFP-1 plays a role in gene silencing; ba…
cel-miR-793-5p	WBGene00004855	sma-1	140	-10.44	sma-1 encodes a beta-H spectrin; during embryonic morphogenesis, SMA-1 activity is required for a normal rate of elongation and thus, for a wild-type body length upon hatching; in addition, SMA-1 is required for proper morphogenesis of the pharynx and the excretory cell; sma-1 mRNA transcripts are first detected in hypodermal cells at the beginning of embryonic morphogenesis with later expression…
cel-miR-793-5p	WBGene00000901	daf-5	147	-17.73	daf-5 encodes a proline-rich protein, conserved in C. briggsae but not observed in non-nematode genomes, that promotes dauer formation in the group II branch of the dauer pathway, may regulate chemosensation via AWC neurons, and may regulate egg laying; daf-5 mutations suppress the dauer phenotype of group II Daf-c mutants; daf-5(e1385) partially suppresses dauer formation by aex-6(sa699) mutants…
cel-miR-799-5p	WBGene00003964	pdi-3	156	-17.57	pdi-3 encodes a protein disulfide isomerase (PDI) required for normal cuticle collagen deposition and, subliminally, for maintenance of normal body shape; PDI-3 has both PDI and calcium-dependent transglutaminase activity in vitro, crosslinking proteins through a gamma-glutamyl epsilon-lysine dual residue; PDI-3 is homologous to the human PDI ERp60, as well as a homolog in the dog heartworm Dirof…
cel-miR-799-5p	WBGene00003559	ncl-1	144	-17.98	ncl-1 encodes a cytoplasmic B-box zinc finger protein that negatively regulates rRNA and 5S RNA transcription, nucleolus size, and body size; NCL-1 is orthologous to Drosophila BRAIN TUMOR (BRAT), and ncl-1 mutants can be rescued by brat transgenes; NCL-1 is required for the normally small size of neuronal, muscle, and hypodermal nucleoli, and is already active in 4-cell embryos; NCL-1 may be a r…
cel-miR-799-5p	WBGene00006888	vbh-1	145	-17.36	vbh-1 encodes a DEAD-box RNA helicase with similarity to Drosophila Vasa and Belle; vbh-1 activity is required for the proper timing of the sperm-oocyte switch during germ line development; vbh-1 also plays a role in embryonic development; in regulating germ line development, vbh-1 appears to function at least partially redundantly with laf-1, which also encodes a DEAD-box RNA helicase; VBH-1 is …
cel-miR-799-5p	WBGene00013131	Y52B11C.1	141	-13.77	none available
cel-miR-799-5p	WBGene00001746	gsk-3	142	-15.08	gsk-3 encodes the C. elegans glycogen synthase kinase ortholog; during embryonic development, GSK-3 functions in the Wnt signaling pathway that restricts specification of mesendodermal tissue to the appropriate blastomere; GSK-3 also functions in a Wnt pathway that regulates anteroposterior axon guidance; GSK-3 plays a role in regulating the oocyte-to-embryo transition, by phosphorylating and neg…
cel-miR-799-5p	WBGene00000376	ccr-4	140	-11.48	none available
cel-miR-799-5p	WBGene00017699	flcn-1	140	-15.65	F22D3.2 encodes an ortholog of human folliculin (OMIM:607273, mutated in Birt-Hogg-Dube syndrome).
cel-miR-799-5p	WBGene00021754	hpo-29	142	-16.56	none available
